# Supplementary material
Source: publisher site journal article supplement (https://www.spandidos-publications.com/3143/downloadSupplementary)
Supplement: Supplementary file 1 [file downloadSupplementary]

## Sheet: BP
Table SIIIA. Statistically significant GO terms in the category of biological process for AKI-24 h/CON-24 h.
maxLevel	levels	GO_Name	GO_ID	Pvalue	Pvalue_adjusted	PAS_Value	PAS_Zscore	max_zscore	min_zscore	Genes	Count	Pop_Hit	List_Total	Background_Genes	URL	PATHS
2	2	multicellular organismal process	GO:0032501	7.82e-36	1.86e-32	-85.63	-8.28	4.84136	-12.6834	KRT16|0.1995;VWF|1.3804;PCDH1|0.4285;SEMG1|41.6869;CTSB|0.3105;CD177|2.1878;CD14|0.8241;HBB|1.6749;HSP90AA1|2.466;MME|2.2284;CSTA|0.177;PKM|4.9659;GAA|0.6026;ALDOA|2.9923;GSN|0.0718;LUM|0.2421;LRG1|0.8017;MSN|3.9084;MYLK|0.7516;MGAM|3.5318;SERPINC1|0.6026;DPP4|2.3335;S100A9|0.0619;PGLYRP1|0.1722;VTN|0.0809;LTF|26.7917;KRT2|13.0617;COL6A1|0.3162;PGLYRP2|0.3945;AHSG|0.1432;ACE|8.2414;VCAM1|9.4624;H…	118	8180	185	38520	http://www.ebi.ac.uk/QuickGO/GTerm?id=GO:0032501	[]
3	3	single-multicellular organism process	GO:0044707	1.01e-35	1.86e-32	-83.77	-8.1	4.84136	-12.6834	KRT16|0.1995;VWF|1.3804;PCDH1|0.4285;SEMG1|41.6869;CTSB|0.3105;CD177|2.1878;CD14|0.8241;HBB|1.6749;HSP90AA1|2.466;MME|2.2284;CSTA|0.177;PKM|4.9659;GAA|0.6026;ALDOA|2.9923;GSN|0.0718;LUM|0.2421;LRG1|0.8017;MSN|3.9084;MYLK|0.7516;MGAM|3.5318;SERPINC1|0.6026;DPP4|2.3335;S100A9|0.0619;PGLYRP1|0.1722;VTN|0.0809;LTF|26.7917;KRT2|13.0617;COL6A1|0.3162;PGLYRP2|0.3945;AHSG|0.1432;ACE|8.2414;VCAM1|9.4624;H…	116	7897	185	38520	http://www.ebi.ac.uk/QuickGO/GTerm?id=GO:0044707	[]
3	3	response to stress	GO:0006950	4.02e-32	4.94e-29	-75.04	-7.24	4.84136	-12.6834	KRT16|0.1995;VWF|1.3804;UBA1|0.0107;SEMG1|41.6869;CTSB|0.3105;CD177|2.1878;CD14|0.8241;HBB|1.6749;HSP90AA1|2.466;PKM|4.9659;CPQ|0.3565;ALDOA|2.9923;GSN|0.0718;P06314|0.0809;MYLK|0.7516;MDH1|2.7542;SERPINC1|0.6026;DPP4|2.3335;PRDX6|8.9536;S100A9|0.0619;PGLYRP1|0.1722;VTN|0.0809;LTF|26.7917;LCP1|3.5645;HBA1|1.5996;PGLYRP2|0.3945;BRD1|0.0125;AHSG|0.1432;VCAM1|9.4624;HSPB1|0.3837;AQP1|0.0133;HBD|25.5…	95	5602	185	38520	http://www.ebi.ac.uk/QuickGO/GTerm?id=GO:0006950	[]
4	4	response to wounding	GO:0009611	8.01e-31	7.38e-28	-34.08	-3.21	4.84136	-12.6834	VWF|1.3804;CTSB|0.3105;CD177|2.1878;HBB|1.6749;PKM|4.9659;CPQ|0.3565;ALDOA|2.9923;GSN|0.0718;MYLK|0.7516;SERPINC1|0.6026;S100A9|0.0619;PGLYRP1|0.1722;VTN|0.0809;LCP1|3.5645;PGLYRP2|0.3945;AHSG|0.1432;HSPB1|0.3837;AQP1|0.0133;HBD|25.5859;PROZ|4.1305;SERPINA5|0.0698;FABP5|0.0296;PARK7|5.9704;YWHAZ|2.704;EGF|0.7943;TFF2|0.2655;SPP1|0.1738;FN1|2.3988;SERPINA1|0.6546;CD63|5.7016;TIMP1|18.197;SOD1|5.70…	47	1110	185	38520	http://www.ebi.ac.uk/QuickGO/GTerm?id=GO:0009611	[]
5	5	wound healing	GO:0042060	3.57e-25	2.63e-22	-25.82	-2.4	4.84136	-12.6834	VWF|1.3804;CD177|2.1878;HBB|1.6749;PKM|4.9659;CPQ|0.3565;ALDOA|2.9923;GSN|0.0718;MYLK|0.7516;SERPINC1|0.6026;S100A9|0.0619;VTN|0.0809;LCP1|3.5645;HSPB1|0.3837;AQP1|0.0133;HBD|25.5859;PROZ|4.1305;SERPINA5|0.0698;YWHAZ|2.704;EGF|0.7943;FN1|2.3988;SERPINA1|0.6546;CD63|5.7016;TIMP1|18.197;SOD1|5.7016;APOE|0.5105;ANXA5|14.0605;APOA1|10.8643;S100A8|0.1644;C3|1.3804;A2M|22.9087;PRCP|0.0685;KRT6A|0.1127;…	36	761	185	38520	http://www.ebi.ac.uk/QuickGO/GTerm?id=GO:0042060	[]
6	6	regulation of peptidase activity	GO:0052547	4.64e-24	2.62e-21	-26.74	-2.49	4.84136	-12.6834	SEMG1|41.6869;CST6|0.0614;CD14|0.8241;CSTA|0.177;GSN|0.0718;SERPINC1|0.6026;S100A9|0.0619;VTN|0.0809;SERPINB13|0.3373;AHSG|0.1432;CTSC|0.3076;CTSH|0.4699;AQP1|0.0133;SERPINB3|0.0377;SERPINA5|0.0698;PARK7|5.9704;A2ML1|0.2168;SERPINA6|0.3873;SERPINA3|0.3436;SPINK5|0.1406;CRYAB|0.2333;FN1|2.3988;SERPINA1|0.6546;SERPINI1|12.1339;SERPINA7|0.2188;SPINK1|0.0113;TIMP1|18.197;S100A8|0.1644;C3|1.3804;A2M|2…	32	597	185	38520	http://www.ebi.ac.uk/QuickGO/GTerm?id=GO:0052547	[]
2	2	developmental process	GO:0032502	4.97e-24	2.62e-21	-72.07	-6.95	4.84136	-12.6834	KRT16|0.1995;PCDH1|0.4285;CST6|0.0614;CTSB|0.3105;HSP90AA1|2.466;MME|2.2284;CSTA|0.177;PKM|4.9659;CPQ|0.3565;GAA|0.6026;ALDOA|2.9923;GSN|0.0718;LUM|0.2421;LRG1|0.8017;MSN|3.9084;MYLK|0.7516;OLFM4|10.7647;PGLYRP1|0.1722;VTN|0.0809;LTF|26.7917;LCP1|3.5645;KRT2|13.0617;COL6A1|0.3162;PGLYRP2|0.3945;AHSG|0.1432;CTSC|0.3076;ACE|8.2414;VCAM1|9.4624;HSPB1|0.3837;CTSH|0.4699;AQP1|0.0133;CPM|3.8371;PGK1|2.…	96	7255	185	38520	http://www.ebi.ac.uk/QuickGO/GTerm?id=GO:0032502	[]
4	4	defense response	GO:0006952	8.06e-24	3.72e-21	-39.14	-3.71	4.84136	-12.6834	KRT16|0.1995;SEMG1|41.6869;CTSB|0.3105;CD14|0.8241;HSP90AA1|2.466;P06314|0.0809;MYLK|0.7516;MDH1|2.7542;SERPINC1|0.6026;DPP4|2.3335;S100A9|0.0619;PGLYRP1|0.1722;VTN|0.0809;LTF|26.7917;PGLYRP2|0.3945;AHSG|0.1432;VCAM1|9.4624;LYZ|0.5346;KLK3|65.4636;LCN2|0.2208;PARK7|5.9704;HP|34.3558;SERPINA3|0.3436;EGF|0.7943;TFF2|0.2655;SPP1|0.1738;GAPDH|2.2699;MASP2|0.4446;FN1|2.3988;SERPINA1|0.6546;PRDX1|2.910…	54	2221	185	38520	http://www.ebi.ac.uk/QuickGO/GTerm?id=GO:0006952	[]
7	7	regulation of endopeptidase activity	GO:0052548	1.54e-22	6.32e-20	-25.62	-2.38	4.84136	-12.6834	SEMG1|41.6869;CST6|0.0614;CD14|0.8241;CSTA|0.177;GSN|0.0718;SERPINC1|0.6026;S100A9|0.0619;VTN|0.0809;SERPINB13|0.3373;AHSG|0.1432;CTSC|0.3076;CTSH|0.4699;AQP1|0.0133;SERPINB3|0.0377;SERPINA5|0.0698;PARK7|5.9704;A2ML1|0.2168;SERPINA6|0.3873;SERPINA3|0.3436;SPINK5|0.1406;CRYAB|0.2333;SERPINA1|0.6546;SERPINI1|12.1339;SERPINA7|0.2188;SPINK1|0.0113;TIMP1|18.197;S100A8|0.1644;C3|1.3804;A2M|22.9087;C4A|…	30	562	185	38520	http://www.ebi.ac.uk/QuickGO/GTerm?id=GO:0052548	[]
2	2	response to stimulus	GO:0050896	5.06e-22	1.86e-19	-99.39	-9.63	4.84136	-12.6834	KRT16|0.1995;VWF|1.3804;UBA1|0.0107;SEMG1|41.6869;LASP1|0.0281;CTSB|0.3105;PDZK1|11.695;CD177|2.1878;CD14|0.8241;HBB|1.6749;HSP90AA1|2.466;MME|2.2284;PKM|4.9659;CPQ|0.3565;ALDOA|2.9923;GSN|0.0718;LUM|0.2421;P06314|0.0809;LRG1|0.8017;MSN|3.9084;MYLK|0.7516;MDH1|2.7542;SERPINC1|0.6026;DPP4|2.3335;PRDX6|8.9536;S100A9|0.0619;OLFM4|10.7647;CNDP2|2.6303;PGLYRP1|0.1722;VTN|0.0809;LTF|26.7917;SERPINB13|0…	128	13260	185	38520	http://www.ebi.ac.uk/QuickGO/GTerm?id=GO:0050896	[]
3	3	single-organism developmental process	GO:0044767	5.82e-22	1.86e-19	-68.32	-6.58	4.84136	-12.6834	KRT16|0.1995;PCDH1|0.4285;CTSB|0.3105;HSP90AA1|2.466;MME|2.2284;CSTA|0.177;PKM|4.9659;CPQ|0.3565;GAA|0.6026;ALDOA|2.9923;GSN|0.0718;LUM|0.2421;LRG1|0.8017;MSN|3.9084;MYLK|0.7516;OLFM4|10.7647;PGLYRP1|0.1722;VTN|0.0809;LTF|26.7917;LCP1|3.5645;KRT2|13.0617;COL6A1|0.3162;PGLYRP2|0.3945;AHSG|0.1432;CTSC|0.3076;ACE|8.2414;VCAM1|9.4624;HSPB1|0.3837;CTSH|0.4699;AQP1|0.0133;PGK1|2.0324;PRG4|0.3631;RDX|1.…	92	7127	185	38520	http://www.ebi.ac.uk/QuickGO/GTerm?id=GO:0044767	[]
2	2	immune system process	GO:0002376	6.04e-22	1.86e-19	-44.94	-4.28	4.84136	-12.6834	KRT16|0.1995;SEMG1|41.6869;CTSB|0.3105;CD177|2.1878;CD14|0.8241;HSP90AA1|2.466;GSN|0.0718;P06314|0.0809;MSN|3.9084;MYLK|0.7516;MDH1|2.7542;DPP4|2.3335;S100A9|0.0619;OLFM4|10.7647;PGLYRP1|0.1722;VTN|0.0809;LTF|26.7917;LCP1|3.5645;PGLYRP2|0.3945;CTSC|0.3076;ACE|8.2414;VCAM1|9.4624;CTSH|0.4699;PRG4|0.3631;KLK3|65.4636;LCN2|0.2208;HP|34.3558;EGF|0.7943;SPINK5|0.1406;TFF2|0.2655;CDH1|0.8091;SPP1|0.173…	62	3265	185	38520	http://www.ebi.ac.uk/QuickGO/GTerm?id=GO:0002376	[]
3	3	anatomical structure development	GO:0048856	3.41e-21	9.68e-19	-62.97	-6.05	4.84136	-12.6834	KRT16|0.1995;PCDH1|0.4285;CST6|0.0614;CTSB|0.3105;HSP90AA1|2.466;MME|2.2284;CSTA|0.177;PKM|4.9659;CPQ|0.3565;GAA|0.6026;ALDOA|2.9923;GSN|0.0718;LUM|0.2421;LRG1|0.8017;MSN|3.9084;MYLK|0.7516;OLFM4|10.7647;PGLYRP1|0.1722;VTN|0.0809;LTF|26.7917;LCP1|3.5645;KRT2|13.0617;COL6A1|0.3162;PGLYRP2|0.3945;AHSG|0.1432;ACE|8.2414;VCAM1|9.4624;HSPB1|0.3837;CTSH|0.4699;AQP1|0.0133;CPM|3.8371;PGK1|2.0324;PRG4|0.…	85	6288	185	38520	http://www.ebi.ac.uk/QuickGO/GTerm?id=GO:0048856	[]
5	5	proteolysis	GO:0006508	5.27e-21	1.39e-18	-49.54	-4.73	4.84136	-12.6834	UBA1|0.0107;SEMG1|41.6869;CST6|0.0614;CTSB|0.3105;CD14|0.8241;MME|2.2284;CSTA|0.177;CPQ|0.3565;GSN|0.0718;PDCD6IP|2.0701;SERPINC1|0.6026;DPP4|2.3335;S100A9|0.0619;CNDP2|2.6303;VTN|0.0809;LTF|26.7917;SERPINB13|0.3373;AHSG|0.1432;CTSC|0.3076;ACE|8.2414;CTSH|0.4699;AQP1|0.0133;GGH|0.492;CPM|3.8371;SERPINB3|0.0377;PROZ|4.1305;KLK3|65.4636;SERPINA5|0.0698;PARK7|5.9704;A2ML1|0.2168;PGA3|0.2208;SERPINA6…	61	3295	185	38520	http://www.ebi.ac.uk/QuickGO/GTerm?id=GO:0006508	[]
4	4	response to inorganic substance	GO:0010035	2.18e-20	5.36e-18	21.13	2.21	4.84136	-12.6834	CD14|0.8241;HBB|1.6749;GSN|0.0718;S100A9|0.0619;HBA1|1.5996;AQP1|0.0133;GGH|0.492;PARK7|5.9704;KRT10|5.3951;HP|34.3558;CRYAB|0.2333;AOC1|2.0701;CDH1|0.8091;PRDX2|57.0164;PRDX1|2.9107;SORD|13.1826;CA2|8.7096;CAT|22.4905;IGFBP2|0.0698;SOD1|5.7016;ANXA5|14.0605;S100A8|0.1644;C3|1.3804;SCGB1A1|8.5507;APOA4|3.2211;SOD3|8.7902	26	454	185	38520	http://www.ebi.ac.uk/QuickGO/GTerm?id=GO:0010035	[]
2	2	single-organism process	GO:0044699	7.13e-20	1.64e-17	-130.41	-12.68	4.84136	-12.6834	KRT16|0.1995;VWF|1.3804;IGFBP7|0.0824;PCDH1|0.4285;SEMG1|41.6869;LASP1|0.0281;CTSB|0.3105;PDZK1|11.695;CD177|2.1878;CD14|0.8241;HBB|1.6749;HSP90AA1|2.466;MME|2.2284;CSTA|0.177;PKM|4.9659;CPQ|0.3565;GAA|0.6026;ALDOA|2.9923;GSN|0.0718;LUM|0.2421;P06314|0.0809;LRG1|0.8017;PDCD6IP|2.0701;MSN|3.9084;MYLK|0.7516;MDH1|2.7542;REG1A|0.0258;MGAM|3.5318;SERPINC1|0.6026;DPP4|2.3335;PRDX6|8.9536;S100A9|0.0619…	175	25852	185	38520	http://www.ebi.ac.uk/QuickGO/GTerm?id=GO:0044699	[]
4	4	multicellular organismal development	GO:0007275	1.8e-19	3.92e-17	-57.89	-5.56	4.84136	-12.6834	KRT16|0.1995;PCDH1|0.4285;CTSB|0.3105;HSP90AA1|2.466;MME|2.2284;CSTA|0.177;PKM|4.9659;GAA|0.6026;GSN|0.0718;LUM|0.2421;LRG1|0.8017;MSN|3.9084;MYLK|0.7516;PGLYRP1|0.1722;VTN|0.0809;LTF|26.7917;KRT2|13.0617;COL6A1|0.3162;PGLYRP2|0.3945;AHSG|0.1432;ACE|8.2414;VCAM1|9.4624;HSPB1|0.3837;CTSH|0.4699;AQP1|0.0133;PRG4|0.3631;SERPINB3|0.0377;KLK3|65.4636;CKB|15.1356;FOLR1|0.2188;KRT10|5.3951;KRT13|0.0373;…	78	5689	185	38520	http://www.ebi.ac.uk/QuickGO/GTerm?id=GO:0007275	[]
3	3	regulation of response to stimulus	GO:0048583	3.9e-19	7.99e-17	-54.9	-5.26	4.84136	-12.6834	LASP1|0.0281;CTSB|0.3105;CD14|0.8241;HSP90AA1|2.466;GSN|0.0718;P06314|0.0809;LRG1|0.8017;MYLK|0.7516;MDH1|2.7542;SERPINC1|0.6026;S100A9|0.0619;OLFM4|10.7647;PGLYRP1|0.1722;VTN|0.0809;LTF|26.7917;PGLYRP2|0.3945;AHSG|0.1432;CTSC|0.3076;VCAM1|9.4624;HSPB1|0.3837;CTSH|0.4699;SERPINB3|0.0377;FOLR1|0.2188;PARK7|5.9704;YWHAZ|2.704;HP|34.3558;HSPA8|2.3988;EGF|0.7943;SPINK5|0.1406;TFF2|0.2655;CDH1|0.8091;…	69	4568	185	38520	http://www.ebi.ac.uk/QuickGO/GTerm?id=GO:0048583	[]
7	6,7	negative regulation of peptidase activity	GO:0010466	4.67e-19	9.07e-17	-20.68	-1.9	4.84136	-12.6834	CST6|0.0614;CSTA|0.177;SERPINC1|0.6026;VTN|0.0809;SERPINB13|0.3373;AHSG|0.1432;AQP1|0.0133;SERPINB3|0.0377;SERPINA5|0.0698;PARK7|5.9704;A2ML1|0.2168;SERPINA6|0.3873;SERPINA3|0.3436;SPINK5|0.1406;CRYAB|0.2333;SERPINA1|0.6546;SERPINI1|12.1339;SERPINA7|0.2188;SPINK1|0.0113;TIMP1|18.197;C3|1.3804;A2M|22.9087;PI16|0.182;C4A|0.3467	24	412	185	38520	http://www.ebi.ac.uk/QuickGO/GTerm?id=GO:0010466	[]
4	4	system development	GO:0048731	8.28e-19	1.53e-16	-53.62	-5.14	4.84136	-12.6834	KRT16|0.1995;PCDH1|0.4285;CTSB|0.3105;HSP90AA1|2.466;MME|2.2284;CSTA|0.177;PKM|4.9659;GAA|0.6026;GSN|0.0718;LUM|0.2421;LRG1|0.8017;MSN|3.9084;MYLK|0.7516;PGLYRP1|0.1722;VTN|0.0809;LTF|26.7917;KRT2|13.0617;COL6A1|0.3162;PGLYRP2|0.3945;AHSG|0.1432;ACE|8.2414;VCAM1|9.4624;HSPB1|0.3837;CTSH|0.4699;AQP1|0.0133;PRG4|0.3631;SERPINB3|0.0377;KLK3|65.4636;CKB|15.1356;FOLR1|0.2188;KRT10|5.3951;KRT13|0.0373;…	72	5022	185	38520	http://www.ebi.ac.uk/QuickGO/GTerm?id=GO:0048731	[]
4	4	coagulation	GO:0050817	1.41e-18	2.48e-16	18.66	1.97	4.84136	-12.6834	VWF|1.3804;SEMG1|41.6869;CD177|2.1878;HBB|1.6749;ALDOA|2.9923;SERPINC1|0.6026;S100A9|0.0619;VTN|0.0809;HSPB1|0.3837;HBD|25.5859;PROZ|4.1305;SERPINA5|0.0698;YWHAZ|2.704;EGF|0.7943;FN1|2.3988;SERPINA1|0.6546;CD63|5.7016;TIMP1|18.197;SOD1|5.7016;APOE|0.5105;ANXA5|14.0605;APOA1|10.8643;C3|1.3804;A2M|22.9087;PRCP|0.0685;PLG|0.3908;SLC3A2|0.4742	27	594	185	38520	http://www.ebi.ac.uk/QuickGO/GTerm?id=GO:0050817	[]
4	4	tissue development	GO:0009888	2.39e-18	4e-16	-35.93	-3.4	4.84136	-12.6834	KRT16|0.1995;CST6|0.0614;CTSB|0.3105;CSTA|0.177;PKM|4.9659;CPQ|0.3565;GAA|0.6026;GSN|0.0718;LUM|0.2421;MSN|3.9084;MYLK|0.7516;VTN|0.0809;LTF|26.7917;LCP1|3.5645;KRT2|13.0617;COL6A1|0.3162;AHSG|0.1432;CTSH|0.4699;AQP1|0.0133;PGK1|2.0324;RDX|1.5704;SERPINB3|0.0377;FOLR1|0.2188;FABP5|0.0296;KRT10|5.3951;KRT5|0.3802;EGF|0.7943;SPINK5|0.1406;SPP1|0.1738;KRT4|0.0817;FN1|2.3988;SLC9A3R1|3.8726;CA2|8.709…	44	1916	185	38520	http://www.ebi.ac.uk/QuickGO/GTerm?id=GO:0009888	[]
8	7,8	negative regulation of endopeptidase activity	GO:0010951	2.53e-18	4.06e-16	-19.94	-1.82	4.84136	-12.6834	CST6|0.0614;CSTA|0.177;SERPINC1|0.6026;VTN|0.0809;SERPINB13|0.3373;AHSG|0.1432;AQP1|0.0133;SERPINB3|0.0377;SERPINA5|0.0698;PARK7|5.9704;A2ML1|0.2168;SERPINA6|0.3873;SERPINA3|0.3436;SPINK5|0.1406;CRYAB|0.2333;SERPINA1|0.6546;SERPINI1|12.1339;SERPINA7|0.2188;SPINK1|0.0113;TIMP1|18.197;C3|1.3804;A2M|22.9087;C4A|0.3467	23	394	185	38520	http://www.ebi.ac.uk/QuickGO/GTerm?id=GO:0010951	[]
6	5,6	negative regulation of hydrolase activity	GO:0051346	4.18e-18	6.43e-16	-23.15	-2.14	4.84136	-12.6834	CST6|0.0614;CSTA|0.177;SERPINC1|0.6026;VTN|0.0809;LTF|26.7917;SERPINB13|0.3373;AHSG|0.1432;AQP1|0.0133;SERPINB3|0.0377;SERPINA5|0.0698;PARK7|5.9704;A2ML1|0.2168;SERPINA6|0.3873;SERPINA3|0.3436;SPINK5|0.1406;CRYAB|0.2333;SERPINA1|0.6546;SERPINI1|12.1339;SERPINA7|0.2188;SPINK1|0.0113;TIMP1|18.197;APOA1|10.8643;C3|1.3804;A2M|22.9087;PI16|0.182;C4A|0.3467	26	562	185	38520	http://www.ebi.ac.uk/QuickGO/GTerm?id=GO:0051346	[]
3	3	catabolic process	GO:0009056	5.96e-18	8.79e-16	-1.53	-0.01	4.84136	-12.6834	UBA1|0.0107;CTSB|0.3105;HBB|1.6749;PKM|4.9659;CPQ|0.3565;GAA|0.6026;ALDOA|2.9923;LUM|0.2421;PDCD6IP|2.0701;MSN|3.9084;MYLK|0.7516;MDH1|2.7542;MGAM|3.5318;PRDX6|8.9536;S100A9|0.0619;PGLYRP1|0.1722;COL6A1|0.3162;HBA1|1.5996;PGLYRP2|0.3945;CTSC|0.3076;ACE|8.2414;CTSH|0.4699;PGK1|2.0324;BGN|0.1995;RDX|1.5704;FABP5|0.0296;PARK7|5.9704;HP|34.3558;PGA3|0.2208;COL15A1|0.1556;EGF|0.7943;TPI1|2.0893;GAPDH|…	58	3446	185	38520	http://www.ebi.ac.uk/QuickGO/GTerm?id=GO:0009056	[]
5	5	blood coagulation	GO:0007596	1.15e-17	1.64e-15	17.04	1.81	4.84136	-12.6834	VWF|1.3804;CD177|2.1878;HBB|1.6749;ALDOA|2.9923;SERPINC1|0.6026;S100A9|0.0619;VTN|0.0809;HSPB1|0.3837;HBD|25.5859;PROZ|4.1305;SERPINA5|0.0698;YWHAZ|2.704;EGF|0.7943;FN1|2.3988;SERPINA1|0.6546;CD63|5.7016;TIMP1|18.197;SOD1|5.7016;APOE|0.5105;ANXA5|14.0605;APOA1|10.8643;C3|1.3804;A2M|22.9087;PRCP|0.0685;PLG|0.3908;SLC3A2|0.4742	26	586	185	38520	http://www.ebi.ac.uk/QuickGO/GTerm?id=GO:0007596	[]
5	5	extracellular matrix organization	GO:0030198	1.21e-17	1.65e-15	-15.86	-1.42	4.84136	-12.6834	VWF|1.3804;CTSB|0.3105;GSN|0.0718;LUM|0.2421;DPP4|2.3335;VTN|0.0809;LCP1|3.5645;COL6A1|0.3162;VCAM1|9.4624;BGN|0.1995;PARK7|5.9704;HSPA8|2.3988;NID1|0.5058;COL15A1|0.1556;SPINK5|0.1406;CDH1|0.8091;SPP1|0.1738;FN1|2.3988;FBN1|0.1585;TIMP1|18.197;MMP7|0.0817;A2M|22.9087;PLG|0.3908	23	423	185	38520	http://www.ebi.ac.uk/QuickGO/GTerm?id=GO:0030198	[]
4	4	extracellular structure organization	GO:0043062	1.27e-17	1.68e-15	-15.86	-1.42	4.84136	-12.6834	VWF|1.3804;CTSB|0.3105;GSN|0.0718;LUM|0.2421;DPP4|2.3335;VTN|0.0809;LCP1|3.5645;COL6A1|0.3162;VCAM1|9.4624;BGN|0.1995;PARK7|5.9704;HSPA8|2.3988;NID1|0.5058;COL15A1|0.1556;SPINK5|0.1406;CDH1|0.8091;SPP1|0.1738;FN1|2.3988;FBN1|0.1585;TIMP1|18.197;MMP7|0.0817;A2M|22.9087;PLG|0.3908	23	424	185	38520	http://www.ebi.ac.uk/QuickGO/GTerm?id=GO:0043062	[]
5	5	hemostasis	GO:0007599	1.42e-17	1.8e-15	17.04	1.81	4.84136	-12.6834	VWF|1.3804;CD177|2.1878;HBB|1.6749;ALDOA|2.9923;SERPINC1|0.6026;S100A9|0.0619;VTN|0.0809;HSPB1|0.3837;HBD|25.5859;PROZ|4.1305;SERPINA5|0.0698;YWHAZ|2.704;EGF|0.7943;FN1|2.3988;SERPINA1|0.6546;CD63|5.7016;TIMP1|18.197;SOD1|5.7016;APOE|0.5105;ANXA5|14.0605;APOA1|10.8643;C3|1.3804;A2M|22.9087;PRCP|0.0685;PLG|0.3908;SLC3A2|0.4742	26	591	185	38520	http://www.ebi.ac.uk/QuickGO/GTerm?id=GO:0007599	[]
4	4	response to oxygen-containing compound	GO:1901700	1.54e-17	1.89e-15	-29.62	-2.78	4.84136	-12.6834	CTSB|0.3105;CD14|0.8241;HBB|1.6749;PKM|4.9659;GSN|0.0718;MSN|3.9084;PRDX6|8.9536;S100A9|0.0619;LTF|26.7917;COL6A1|0.3162;HBA1|1.5996;AHSG|0.1432;CTSH|0.4699;AQP1|0.0133;GGH|0.492;FOLR1|0.2188;PARK7|5.9704;KRT13|0.0373;HP|34.3558;CRYAB|0.2333;AOC1|2.0701;CDH1|0.8091;SPP1|0.1738;PRDX2|57.0164;PRDX1|2.9107;FBN1|0.1585;PTPRN|0.7047;CAT|22.4905;SERPINA7|0.2188;IGFBP2|0.0698;TIMP1|18.197;SOD1|5.7016;IL…	39	1555	185	38520	http://www.ebi.ac.uk/QuickGO/GTerm?id=GO:1901700	[]
3	3	response to external stimulus	GO:0009605	1.78e-17	2.12e-15	-40.54	-3.85	4.84136	-12.6834	SEMG1|41.6869;CTSB|0.3105;CD14|0.8241;HSP90AA1|2.466;PKM|4.9659;GSN|0.0718;MYLK|0.7516;MDH1|2.7542;SERPINC1|0.6026;S100A9|0.0619;PGLYRP1|0.1722;VTN|0.0809;LTF|26.7917;COL6A1|0.3162;PGLYRP2|0.3945;AHSG|0.1432;HSPB1|0.3837;AQP1|0.0133;LYZ|0.5346;KLK3|65.4636;FOLR1|0.2188;PARK7|5.9704;HP|34.3558;HSPA8|2.3988;TFF2|0.2655;DSC2|0.118;AOC1|2.0701;SPP1|0.1738;CDH13|0.1706;CD63|5.7016;DCD|4.9204;LRP2|0.14…	52	2847	185	38520	http://www.ebi.ac.uk/QuickGO/GTerm?id=GO:0009605	[]
3	3	regulation of biological quality	GO:0065008	1.95e-17	2.25e-15	45.19	4.58	4.84136	-12.6834	KRT16|0.1995;VWF|1.3804;CD177|2.1878;HBB|1.6749;MME|2.2284;CPQ|0.3565;GAA|0.6026;ALDOA|2.9923;GSN|0.0718;MSN|3.9084;SERPINC1|0.6026;S100A9|0.0619;VTN|0.0809;LTF|26.7917;ACE|8.2414;HSPB1|0.3837;CTSH|0.4699;AQP1|0.0133;HBD|25.5859;LYZ|0.5346;RDX|1.5704;PROZ|4.1305;CKB|15.1356;SERPINA5|0.0698;LCN2|0.2208;PARK7|5.9704;YWHAZ|2.704;HSPA8|2.3988;SERPINA3|0.3436;CUBN|0.1067;EGF|0.7943;DSC2|0.118;SPP1|0.1…	66	4523	185	38520	http://www.ebi.ac.uk/QuickGO/GTerm?id=GO:0065008	[]
4	4	regulation of body fluid levels	GO:0050878	4.09e-17	4.57e-15	19.61	2.06	4.84136	-12.6834	KRT16|0.1995;VWF|1.3804;CD177|2.1878;HBB|1.6749;ALDOA|2.9923;SERPINC1|0.6026;S100A9|0.0619;VTN|0.0809;HSPB1|0.3837;AQP1|0.0133;HBD|25.5859;PROZ|4.1305;SERPINA5|0.0698;YWHAZ|2.704;EGF|0.7943;FN1|2.3988;SERPINA1|0.6546;CD63|5.7016;TIMP1|18.197;SOD1|5.7016;APOE|0.5105;ANXA5|14.0605;APOA1|10.8643;C3|1.3804;A2M|22.9087;PRCP|0.0685;PLG|0.3908;SLC3A2|0.4742	28	744	185	38520	http://www.ebi.ac.uk/QuickGO/GTerm?id=GO:0050878	[]
3	3	response to chemical	GO:0042221	6.43e-17	6.97e-15	22.76	2.37	4.84136	-12.6834	CTSB|0.3105;PDZK1|11.695;CD14|0.8241;HBB|1.6749;HSP90AA1|2.466;MME|2.2284;PKM|4.9659;GSN|0.0718;LUM|0.2421;LRG1|0.8017;MSN|3.9084;SERPINC1|0.6026;PRDX6|8.9536;S100A9|0.0619;CNDP2|2.6303;VTN|0.0809;LTF|26.7917;COL6A1|0.3162;HBA1|1.5996;AHSG|0.1432;CTSC|0.3076;VCAM1|9.4624;HSPB1|0.3837;CTSH|0.4699;AQP1|0.0133;GGH|0.492;FOLR1|0.2188;PARK7|5.9704;KRT10|5.3951;KRT13|0.0373;HP|34.3558;HSPA8|2.3988;EGF|…	69	5027	185	38520	http://www.ebi.ac.uk/QuickGO/GTerm?id=GO:0042221	[]
6	6	regulation of proteolysis	GO:0030162	8.46e-17	8.91e-15	-27.14	-2.53	4.84136	-12.6834	SEMG1|41.6869;CST6|0.0614;CD14|0.8241;CSTA|0.177;GSN|0.0718;SERPINC1|0.6026;S100A9|0.0619;VTN|0.0809;SERPINB13|0.3373;AHSG|0.1432;CTSC|0.3076;CTSH|0.4699;AQP1|0.0133;SERPINB3|0.0377;SERPINA5|0.0698;PARK7|5.9704;A2ML1|0.2168;SERPINA6|0.3873;SERPINA3|0.3436;EGF|0.7943;SPINK5|0.1406;CRYAB|0.2333;FN1|2.3988;SERPINA1|0.6546;SERPINI1|12.1339;SERPINA7|0.2188;SPINK1|0.0113;TIMP1|18.197;APOE|0.5105;S100A8…	34	1209	185	38520	http://www.ebi.ac.uk/QuickGO/GTerm?id=GO:0030162	[]
6	5,6	extracellular matrix disassembly	GO:0022617	1.1e-16	1.11e-14	-10.32	-0.88	4.84136	-12.6834	CTSB|0.3105;GSN|0.0718;DPP4|2.3335;LCP1|3.5645;COL6A1|0.3162;NID1|0.5058;COL15A1|0.1556;CDH1|0.8091;SPP1|0.1738;FN1|2.3988;FBN1|0.1585;TIMP1|18.197;MMP7|0.0817;A2M|22.9087;PLG|0.3908	15	131	185	38520	http://www.ebi.ac.uk/QuickGO/GTerm?id=GO:0022617	[]
3	3	regulation of immune system process	GO:0002682	1.12e-16	1.11e-14	-29.3	-2.74	4.84136	-12.6834	CTSB|0.3105;CD14|0.8241;HSP90AA1|2.466;GSN|0.0718;P06314|0.0809;MSN|3.9084;MYLK|0.7516;MDH1|2.7542;DPP4|2.3335;OLFM4|10.7647;PGLYRP1|0.1722;VTN|0.0809;LTF|26.7917;PGLYRP2|0.3945;ACE|8.2414;VCAM1|9.4624;CTSH|0.4699;EGF|0.7943;SPINK5|0.1406;TFF2|0.2655;CDH1|0.8091;MASP2|0.4446;HLA-DRA|1.406;CA2|8.7096;IGFBP2|0.0698;LAMP1|2.6062;P01594|0.0643;SOD1|5.7016;ANXA5|14.0605;APOA1|10.8643;IGHG3|0.2992;C3|1…	40	1742	185	38520	http://www.ebi.ac.uk/QuickGO/GTerm?id=GO:0002682	[]
6	6	negative regulation of proteolysis	GO:0045861	2.35e-16	2.28e-14	-20.68	-1.9	4.84136	-12.6834	CST6|0.0614;CSTA|0.177;SERPINC1|0.6026;VTN|0.0809;SERPINB13|0.3373;AHSG|0.1432;AQP1|0.0133;SERPINB3|0.0377;SERPINA5|0.0698;PARK7|5.9704;A2ML1|0.2168;SERPINA6|0.3873;SERPINA3|0.3436;SPINK5|0.1406;CRYAB|0.2333;SERPINA1|0.6546;SERPINI1|12.1339;SERPINA7|0.2188;SPINK1|0.0113;TIMP1|18.197;C3|1.3804;A2M|22.9087;PI16|0.182;C4A|0.3467	24	542	185	38520	http://www.ebi.ac.uk/QuickGO/GTerm?id=GO:0045861	[]
3	3	positive regulation of response to stimulus	GO:0048584	5.57e-16	5.27e-14	-35.28	-3.33	4.84136	-12.6834	LASP1|0.0281;CTSB|0.3105;CD14|0.8241;HSP90AA1|2.466;GSN|0.0718;P06314|0.0809;LRG1|0.8017;MYLK|0.7516;MDH1|2.7542;S100A9|0.0619;PGLYRP1|0.1722;VTN|0.0809;LTF|26.7917;PGLYRP2|0.3945;CTSC|0.3076;HSPB1|0.3837;CTSH|0.4699;PARK7|5.9704;YWHAZ|2.704;EGF|0.7943;TFF2|0.2655;MASP2|0.4446;CDH13|0.1706;ACPP|64.2688;CD63|5.7016;SHISA5|0.2704;SLC9A3R1|3.8726;HLA-DRA|1.406;CAT|22.4905;LAMP1|2.6062;P01594|0.0643;…	46	2431	185	38520	http://www.ebi.ac.uk/QuickGO/GTerm?id=GO:0048584	[]
2	2	biological adhesion	GO:0022610	8.57e-16	7.91e-14	-29	-2.72	4.84136	-12.6834	VWF|1.3804;IGFBP7|0.0824;PCDH1|0.4285;HBB|1.6749;CSTA|0.177;GSN|0.0718;MSN|3.9084;DPP4|2.3335;S100A9|0.0619;OLFM4|10.7647;VTN|0.0809;LTF|26.7917;LCP1|3.5645;COL6A1|0.3162;BCAM|0.4875;VCAM1|9.4624;HSPB1|0.3837;NID1|0.5058;COL15A1|0.1556;LYPD3|0.182;SPINK5|0.1406;DSC2|0.118;CDH1|0.8091;SPP1|0.1738;CDH13|0.1706;FN1|2.3988;CD63|5.7016;CRNN|0.0453;SERPINI1|12.1339;HLA-DRA|1.406;IGFBP2|0.0698;SOD1|5.70…	42	2047	185	38520	http://www.ebi.ac.uk/QuickGO/GTerm?id=GO:0022610	[]
5	4,5	negative regulation of catalytic activity	GO:0043086	1.6e-15	1.44e-13	-27.47	-2.56	4.84136	-12.6834	CST6|0.0614;CSTA|0.177;SERPINC1|0.6026;VTN|0.0809;LTF|26.7917;SERPINB13|0.3373;AHSG|0.1432;HSPB1|0.3837;AQP1|0.0133;SERPINB3|0.0377;SERPINA5|0.0698;PARK7|5.9704;HP|34.3558;A2ML1|0.2168;SERPINA6|0.3873;SERPINA3|0.3436;SPINK5|0.1406;CRYAB|0.2333;SERPINA1|0.6546;SERPINI1|12.1339;SERPINA7|0.2188;SPINK1|0.0113;TIMP1|18.197;APOE|0.5105;ANXA5|14.0605;APOA1|10.8643;C3|1.3804;A2M|22.9087;SCGB1A1|8.5507;PI…	31	1088	185	38520	http://www.ebi.ac.uk/QuickGO/GTerm?id=GO:0043086	[]
5	5	inflammatory response	GO:0006954	1.8e-15	1.58e-13	-17.7	-1.6	4.84136	-12.6834	KRT16|0.1995;CD14|0.8241;SERPINC1|0.6026;S100A9|0.0619;PGLYRP1|0.1722;VTN|0.0809;PGLYRP2|0.3945;AHSG|0.1432;LYZ|0.5346;PARK7|5.9704;HP|34.3558;SERPINA3|0.3436;TFF2|0.2655;SPP1|0.1738;FN1|2.3988;SERPINA1|0.6546;IL1RN|0.2729;APOE|0.5105;APOA1|10.8643;S100A8|0.1644;C3|1.3804;A2M|22.9087;PRCP|0.0685;SCGB1A1|8.5507;C4A|0.3467;GGT1|5.0582	26	724	185	38520	http://www.ebi.ac.uk/QuickGO/GTerm?id=GO:0006954	[]
5	5	regulation of response to wounding	GO:1903034	2.26e-15	1.94e-13	-15.18	-1.36	4.84136	-12.6834	GSN|0.0718;MYLK|0.7516;SERPINC1|0.6026;S100A9|0.0619;PGLYRP1|0.1722;VTN|0.0809;PGLYRP2|0.3945;AHSG|0.1432;PARK7|5.9704;TFF2|0.2655;SPP1|0.1738;APOE|0.5105;ANXA5|14.0605;APOA1|10.8643;S100A8|0.1644;C3|1.3804;A2M|22.9087;PLG|0.3908;SCGB1A1|8.5507;C4A|0.3467;GGT1|5.0582	21	425	185	38520	http://www.ebi.ac.uk/QuickGO/GTerm?id=GO:1903034	[]
4	4	response to organic substance	GO:0010033	2.33e-15	1.95e-13	-38.36	-3.64	4.84136	-12.6834	CTSB|0.3105;CD14|0.8241;HSP90AA1|2.466;MME|2.2284;PKM|4.9659;GSN|0.0718;LUM|0.2421;LRG1|0.8017;MSN|3.9084;S100A9|0.0619;VTN|0.0809;LTF|26.7917;COL6A1|0.3162;AHSG|0.1432;CTSC|0.3076;VCAM1|9.4624;HSPB1|0.3837;CTSH|0.4699;AQP1|0.0133;GGH|0.492;FOLR1|0.2188;PARK7|5.9704;KRT13|0.0373;HSPA8|2.3988;EGF|0.7943;TFF2|0.2655;CRYAB|0.2333;AOC1|2.0701;CDH1|0.8091;SPP1|0.1738;GAPDH|2.2699;CDH13|0.1706;CD63|5.7…	54	3440	185	38520	http://www.ebi.ac.uk/QuickGO/GTerm?id=GO:0010033	[]
2	2	positive regulation of biological process	GO:0048518	3e-15	2.43e-13	-60.29	-5.79	4.84136	-12.6834	SEMG1|41.6869;LASP1|0.0281;CTSB|0.3105;PDZK1|11.695;CD14|0.8241;HBB|1.6749;HSP90AA1|2.466;GSN|0.0718;LUM|0.2421;P06314|0.0809;LRG1|0.8017;PDCD6IP|2.0701;MSN|3.9084;MYLK|0.7516;MDH1|2.7542;REG1A|0.0258;DPP4|2.3335;S100A9|0.0619;OLFM4|10.7647;PGLYRP1|0.1722;VTN|0.0809;LTF|26.7917;LCP1|3.5645;HBA1|1.5996;PGLYRP2|0.3945;AHSG|0.1432;CTSC|0.3076;ACE|8.2414;VCAM1|9.4624;HSPB1|0.3837;CTSH|0.4699;AQP1|0.0…	80	7022	185	38520	http://www.ebi.ac.uk/QuickGO/GTerm?id=GO:0048518	[]
3	3	negative regulation of cellular process	GO:0048523	3.03e-15	2.43e-13	-50.85	-4.86	4.84136	-12.6834	KRT16|0.1995;IGFBP7|0.0824;SEMG1|41.6869;CST6|0.0614;CTSB|0.3105;CSTA|0.177;GSN|0.0718;SERPINC1|0.6026;DPP4|2.3335;OLFM4|10.7647;PGLYRP1|0.1722;VTN|0.0809;LTF|26.7917;SERPINB13|0.3373;PGLYRP2|0.3945;AHSG|0.1432;ACE|8.2414;HSPB1|0.3837;CTSH|0.4699;AQP1|0.0133;PRG4|0.3631;RDX|1.5704;SERPINB3|0.0377;SERPINA5|0.0698;PARK7|5.9704;YWHAZ|2.704;HP|34.3558;A2ML1|0.2168;HSPA8|2.3988;SERPINA6|0.3873;SERPINA…	66	5003	185	38520	http://www.ebi.ac.uk/QuickGO/GTerm?id=GO:0048523	[]
3	3	cell adhesion	GO:0007155	4.13e-15	3.24e-13	-27.58	-2.58	4.84136	-12.6834	VWF|1.3804;IGFBP7|0.0824;PCDH1|0.4285;HBB|1.6749;CSTA|0.177;GSN|0.0718;MSN|3.9084;DPP4|2.3335;S100A9|0.0619;OLFM4|10.7647;VTN|0.0809;LCP1|3.5645;COL6A1|0.3162;BCAM|0.4875;VCAM1|9.4624;HSPB1|0.3837;NID1|0.5058;COL15A1|0.1556;LYPD3|0.182;SPINK5|0.1406;DSC2|0.118;CDH1|0.8091;SPP1|0.1738;CDH13|0.1706;FN1|2.3988;CD63|5.7016;CRNN|0.0453;SERPINI1|12.1339;HLA-DRA|1.406;IGFBP2|0.0698;SOD1|5.7016;IL1RN|0.2…	41	2041	185	38520	http://www.ebi.ac.uk/QuickGO/GTerm?id=GO:0007155	[]
5	5	response to reactive oxygen species	GO:0000302	6.04e-15	4.64e-13	13.36	1.45	4.84136	-12.6834	HBB|1.6749;PRDX6|8.9536;HBA1|1.5996;AQP1|0.0133;PARK7|5.9704;HP|34.3558;CRYAB|0.2333;PRDX2|57.0164;PRDX1|2.9107;PTPRN|0.7047;CAT|22.4905;SOD1|5.7016;APOE|0.5105;SCGB1A1|8.5507;APOA4|3.2211;SOD3|8.7902	16	208	185	38520	http://www.ebi.ac.uk/QuickGO/GTerm?id=GO:0000302	[]
5	5	response to metal ion	GO:0010038	7.46e-15	5.61e-13	14.88	1.6	4.84136	-12.6834	CD14|0.8241;GSN|0.0718;S100A9|0.0619;AQP1|0.0133;GGH|0.492;PARK7|5.9704;KRT10|5.3951;AOC1|2.0701;CDH1|0.8091;SORD|13.1826;CA2|8.7096;CAT|22.4905;IGFBP2|0.0698;SOD1|5.7016;ANXA5|14.0605;S100A8|0.1644;C3|1.3804;SOD3|8.7902	18	297	185	38520	http://www.ebi.ac.uk/QuickGO/GTerm?id=GO:0010038	[]
4	4	negative regulation of molecular function	GO:0044092	8.13e-15	6e-13	-29.41	-2.76	4.84136	-12.6834	CST6|0.0614;CSTA|0.177;SERPINC1|0.6026;VTN|0.0809;LTF|26.7917;SERPINB13|0.3373;AHSG|0.1432;HSPB1|0.3837;AQP1|0.0133;SERPINB3|0.0377;SERPINA5|0.0698;PARK7|5.9704;HP|34.3558;A2ML1|0.2168;SERPINA6|0.3873;SERPINA3|0.3436;SPINK5|0.1406;CRYAB|0.2333;SERPINA1|0.6546;SLC9A3R1|3.8726;SERPINI1|12.1339;CAT|22.4905;SERPINA7|0.2188;SPINK1|0.0113;TIMP1|18.197;APOE|0.5105;ANXA5|14.0605;APOA1|10.8643;C3|1.3804;A…	33	1325	185	38520	http://www.ebi.ac.uk/QuickGO/GTerm?id=GO:0044092	[]
5	5	hydrogen peroxide metabolic process	GO:0042743	8.54e-15	6.17e-13	8.53	0.97	4.84136	-12.6834	HBB|1.6749;PRDX6|8.9536;HBA1|1.5996;PARK7|5.9704;HP|34.3558;PRDX2|57.0164;PRDX1|2.9107;CAT|22.4905;SOD1|5.7016;APOA4|3.2211	10	43	185	38520	http://www.ebi.ac.uk/QuickGO/GTerm?id=GO:0042743	[]
3	3	immune response	GO:0006955	8.84e-15	6.27e-13	-30.21	-2.83	4.84136	-12.6834	KRT16|0.1995;SEMG1|41.6869;CTSB|0.3105;CD14|0.8241;HSP90AA1|2.466;P06314|0.0809;S100A9|0.0619;OLFM4|10.7647;PGLYRP1|0.1722;VTN|0.0809;LTF|26.7917;LCP1|3.5645;PGLYRP2|0.3945;CTSC|0.3076;VCAM1|9.4624;CTSH|0.4699;PRG4|0.3631;KLK3|65.4636;LCN2|0.2208;EGF|0.7943;SPINK5|0.1406;CDH1|0.8091;GAPDH|2.2699;MASP2|0.4446;PRDX1|2.9107;HLA-DRA|1.406;LAMP1|2.6062;P01594|0.0643;IL1RN|0.2729;APOA1|10.8643;S100A8|0…	42	2191	185	38520	http://www.ebi.ac.uk/QuickGO/GTerm?id=GO:0006955	[]
4	4	single-organism catabolic process	GO:0044712	9.82e-15	6.83e-13	26.14	2.7	4.84136	-12.6834	CTSB|0.3105;HBB|1.6749;PKM|4.9659;GAA|0.6026;ALDOA|2.9923;LUM|0.2421;MYLK|0.7516;MDH1|2.7542;PRDX6|8.9536;COL6A1|0.3162;HBA1|1.5996;ACE|8.2414;PGK1|2.0324;BGN|0.1995;FABP5|0.0296;PARK7|5.9704;HP|34.3558;COL15A1|0.1556;TPI1|2.0893;GAPDH|2.2699;PRDX2|57.0164;GLB1|0.52;PRDX1|2.9107;GNS|0.4246;SORD|13.1826;CAT|22.4905;APOE|0.5105;ANXA5|14.0605;APOA1|10.8643;MMP7|0.0817;CTBS|0.3908;KRT6A|0.1127;HEXB|1…	37	1699	185	38520	http://www.ebi.ac.uk/QuickGO/GTerm?id=GO:0044712	[]
4	4	regulation of response to stress	GO:0080134	2.63e-14	1.79e-12	-24.93	-2.32	4.84136	-12.6834	CTSB|0.3105;CD14|0.8241;HSP90AA1|2.466;GSN|0.0718;MYLK|0.7516;MDH1|2.7542;SERPINC1|0.6026;S100A9|0.0619;PGLYRP1|0.1722;VTN|0.0809;LTF|26.7917;PGLYRP2|0.3945;AHSG|0.1432;HSPB1|0.3837;SERPINB3|0.0377;PARK7|5.9704;HP|34.3558;HSPA8|2.3988;TFF2|0.2655;SPP1|0.1738;PRDX1|2.9107;LAMP1|2.6062;SOD1|5.7016;IL1RN|0.2729;APOE|0.5105;ANXA5|14.0605;APOA1|10.8643;S100A8|0.1644;C3|1.3804;A2M|22.9087;KRT6A|0.1127;…	35	1564	185	38520	http://www.ebi.ac.uk/QuickGO/GTerm?id=GO:0080134	[]
4	4	protein metabolic process	GO:0019538	3e-14	2.02e-12	-75.69	-7.3	4.84136	-12.6834	VWF|1.3804;UBA1|0.0107;SEMG1|41.6869;CST6|0.0614;CTSB|0.3105;CD14|0.8241;HSP90AA1|2.466;MME|2.2284;CSTA|0.177;CPQ|0.3565;GSN|0.0718;P06314|0.0809;PDCD6IP|2.0701;MSN|3.9084;MYLK|0.7516;SERPINC1|0.6026;DPP4|2.3335;S100A9|0.0619;PPIC|9.6383;MAN2B2|0.3048;CNDP2|2.6303;VTN|0.0809;LTF|26.7917;SERPINB13|0.3373;BRD1|0.0125;AHSG|0.1432;CTSC|0.3076;ACE|8.2414;HSPB1|0.3837;CTSH|0.4699;AQP1|0.0133;GGH|0.492;…	100	10637	185	38520	http://www.ebi.ac.uk/QuickGO/GTerm?id=GO:0019538	[]
4	4	movement of cell or subcellular component	GO:0006928	3.64e-14	2.4e-12	-15.88	-1.43	4.84136	-12.6834	KRT16|0.1995;SEMG1|41.6869;CD177|2.1878;HSP90AA1|2.466;GSN|0.0718;MSN|3.9084;MYLK|0.7516;DPP4|2.3335;S100A9|0.0619;OLFM4|10.7647;VTN|0.0809;LCP1|3.5645;KRT2|13.0617;COL6A1|0.3162;ACE|8.2414;VCAM1|9.4624;HSPB1|0.3837;CTSH|0.4699;AQP1|0.0133;SERPINB3|0.0377;FOLR1|0.2188;HSPA8|2.3988;TFF2|0.2655;DSC2|0.118;SPP1|0.1738;CDH13|0.1706;FN1|2.3988;CD63|5.7016;SLC9A3R1|3.8726;SORD|13.1826;TPM4|0.3076;LAMP1…	43	2392	185	38520	http://www.ebi.ac.uk/QuickGO/GTerm?id=GO:0006928	[]
3	3	cell motility	GO:0048870	4.33e-14	2.75e-12	-13.94	-1.23	4.84136	-12.6834	KRT16|0.1995;SEMG1|41.6869;CD177|2.1878;GSN|0.0718;MSN|3.9084;MYLK|0.7516;DPP4|2.3335;S100A9|0.0619;OLFM4|10.7647;VTN|0.0809;LCP1|3.5645;KRT2|13.0617;ACE|8.2414;VCAM1|9.4624;HSPB1|0.3837;CTSH|0.4699;AQP1|0.0133;SERPINB3|0.0377;FOLR1|0.2188;TFF2|0.2655;SPP1|0.1738;CDH13|0.1706;FN1|2.3988;CD63|5.7016;SLC9A3R1|3.8726;SORD|13.1826;TIMP1|18.197;IL1RN|0.2729;APOE|0.5105;SH3BGRL3|0.0409;ANXA5|14.0605;AP…	35	1591	185	38520	http://www.ebi.ac.uk/QuickGO/GTerm?id=GO:0048870	[]
3	3	localization of cell	GO:0051674	4.33e-14	2.75e-12	-13.94	-1.23	4.84136	-12.6834	KRT16|0.1995;SEMG1|41.6869;CD177|2.1878;GSN|0.0718;MSN|3.9084;MYLK|0.7516;DPP4|2.3335;S100A9|0.0619;OLFM4|10.7647;VTN|0.0809;LCP1|3.5645;KRT2|13.0617;ACE|8.2414;VCAM1|9.4624;HSPB1|0.3837;CTSH|0.4699;AQP1|0.0133;SERPINB3|0.0377;FOLR1|0.2188;TFF2|0.2655;SPP1|0.1738;CDH13|0.1706;FN1|2.3988;CD63|5.7016;SLC9A3R1|3.8726;SORD|13.1826;TIMP1|18.197;IL1RN|0.2729;APOE|0.5105;SH3BGRL3|0.0409;ANXA5|14.0605;AP…	35	1591	185	38520	http://www.ebi.ac.uk/QuickGO/GTerm?id=GO:0051674	[]
4	4	regulation of cellular component organization	GO:0051128	4.85e-14	3.03e-12	-33.85	-3.19	4.84136	-12.6834	IGFBP7|0.0824;PDZK1|11.695;CD14|0.8241;ALDOA|2.9923;GSN|0.0718;PDCD6IP|2.0701;MSN|3.9084;MYLK|0.7516;MDH1|2.7542;DPP4|2.3335;S100A9|0.0619;OLFM4|10.7647;VTN|0.0809;LCP1|3.5645;AHSG|0.1432;ACE|8.2414;AQP1|0.0133;RDX|1.5704;SERPINB3|0.0377;PARK7|5.9704;YWHAZ|2.704;HSPA8|2.3988;LMAN2|0.2466;EGF|0.7943;CRYAB|0.2333;SPP1|0.1738;PAPPA2|8.8716;CDH13|0.1706;FN1|2.3988;CD63|5.7016;SLC9A3R1|3.8726;VASN|0.0…	46	2746	185	38520	http://www.ebi.ac.uk/QuickGO/GTerm?id=GO:0051128	[]
2	2	negative regulation of biological process	GO:0048519	5.09e-14	3.13e-12	-52.67	-5.04	4.84136	-12.6834	KRT16|0.1995;IGFBP7|0.0824;SEMG1|41.6869;CST6|0.0614;CTSB|0.3105;CSTA|0.177;GSN|0.0718;SERPINC1|0.6026;DPP4|2.3335;OLFM4|10.7647;PGLYRP1|0.1722;VTN|0.0809;LTF|26.7917;SERPINB13|0.3373;PGLYRP2|0.3945;AHSG|0.1432;ACE|8.2414;HSPB1|0.3837;CTSH|0.4699;AQP1|0.0133;PRG4|0.3631;RDX|1.5704;SERPINB3|0.0377;KLK3|65.4636;SERPINA5|0.0698;PARK7|5.9704;YWHAZ|2.704;HP|34.3558;A2ML1|0.2168;HSPA8|2.3988;SERPINA6|0…	67	5444	185	38520	http://www.ebi.ac.uk/QuickGO/GTerm?id=GO:0048519	[]
3	3	single-organism metabolic process	GO:0044710	5.46e-14	3.3e-12	-68.41	-6.59	4.84136	-12.6834	VWF|1.3804;CTSB|0.3105;HBB|1.6749;HSP90AA1|2.466;MME|2.2284;PKM|4.9659;GAA|0.6026;ALDOA|2.9923;GSN|0.0718;LUM|0.2421;P06314|0.0809;MYLK|0.7516;MDH1|2.7542;MGAM|3.5318;SERPINC1|0.6026;PRDX6|8.9536;MAN2B2|0.3048;DDT|4.5709;CNDP2|2.6303;VTN|0.0809;COL6A1|0.3162;HBA1|1.5996;BRD1|0.0125;ACE|8.2414;VCAM1|9.4624;CTSH|0.4699;AQP1|0.0133;GGH|0.492;PGK1|2.0324;BGN|0.1995;SERPINB3|0.0377;CKB|15.1356;FOLR1|0…	93	9513	185	38520	http://www.ebi.ac.uk/QuickGO/GTerm?id=GO:0044710	[]
3	3	regulation of localization	GO:0032879	7.08e-14	4.21e-12	-34.71	-3.28	4.84136	-12.6834	KRT16|0.1995;SEMG1|41.6869;PDZK1|11.695;CD14|0.8241;GSN|0.0718;PDCD6IP|2.0701;MSN|3.9084;MYLK|0.7516;S100A9|0.0619;OLFM4|10.7647;VTN|0.0809;LCP1|3.5645;AHSG|0.1432;ACE|8.2414;HSPB1|0.3837;CTSH|0.4699;AQP1|0.0133;AHNAK|0.0643;RDX|1.5704;SERPINB3|0.0377;PARK7|5.9704;YWHAZ|2.704;LMAN2|0.2466;EGF|0.7943;TFF2|0.2655;CRYAB|0.2333;DSC2|0.118;CDH1|0.8091;CDH13|0.1706;FN1|2.3988;CD63|5.7016;SLC9A3R1|3.872…	46	2775	185	38520	http://www.ebi.ac.uk/QuickGO/GTerm?id=GO:0032879	[]
5	4,5	hydrogen peroxide catabolic process	GO:0042744	7.34e-14	4.3e-12	7	0.82	4.84136	-12.6834	HBB|1.6749;PRDX6|8.9536;HBA1|1.5996;HP|34.3558;PRDX2|57.0164;PRDX1|2.9107;CAT|22.4905;APOA4|3.2211	8	22	185	38520	http://www.ebi.ac.uk/QuickGO/GTerm?id=GO:0042744	[]
5	4,5	organ development	GO:0048513	2.65e-13	1.53e-11	-38.98	-3.7	4.84136	-12.6834	KRT16|0.1995;CTSB|0.3105;MME|2.2284;CSTA|0.177;PKM|4.9659;GAA|0.6026;LUM|0.2421;MSN|3.9084;MYLK|0.7516;PGLYRP1|0.1722;LTF|26.7917;KRT2|13.0617;PGLYRP2|0.3945;AHSG|0.1432;ACE|8.2414;VCAM1|9.4624;CTSH|0.4699;AQP1|0.0133;PRG4|0.3631;SERPINB3|0.0377;CKB|15.1356;FOLR1|0.2188;KRT10|5.3951;KRT13|0.0373;NID1|0.5058;EGF|0.7943;SPINK5|0.1406;CRYAB|0.2333;CDH1|0.8091;SPP1|0.1738;PAPPA2|8.8716;SLC9A3R1|3.872…	50	3359	185	38520	http://www.ebi.ac.uk/QuickGO/GTerm?id=GO:0048513	[]
9	6,8,9	platelet degranulation	GO:0002576	4.16e-13	2.36e-11	6.86	0.81	4.84136	-12.6834	VWF|1.3804;ALDOA|2.9923;EGF|0.7943;FN1|2.3988;SERPINA1|0.6546;CD63|5.7016;TIMP1|18.197;SOD1|5.7016;APOA1|10.8643;A2M|22.9087;PLG|0.3908	11	86	185	38520	http://www.ebi.ac.uk/QuickGO/GTerm?id=GO:0002576	[]
4	4	cell activation	GO:0001775	4.34e-13	2.42e-11	17.62	1.87	4.84136	-12.6834	VWF|1.3804;HBB|1.6749;ALDOA|2.9923;GSN|0.0718;DPP4|2.3335;PGLYRP1|0.1722;LCP1|3.5645;KRT2|13.0617;PGLYRP2|0.3945;VCAM1|9.4624;HSPB1|0.3837;YWHAZ|2.704;EGF|0.7943;SPINK5|0.1406;TFF2|0.2655;FN1|2.3988;SERPINA1|0.6546;CD63|5.7016;HLA-DRA|1.406;IGFBP2|0.0698;LAMP1|2.6062;TIMP1|18.197;SOD1|5.7016;APOE|0.5105;APOA1|10.8643;A2M|22.9087;PLG|0.3908;SCGB1A1|8.5507	28	1081	185	38520	http://www.ebi.ac.uk/QuickGO/GTerm?id=GO:0001775	[]
2	2	locomotion	GO:0040011	5.68e-13	3.13e-11	0.22	0.16	4.84136	-12.6834	KRT16|0.1995;SEMG1|41.6869;CD177|2.1878;HSP90AA1|2.466;GSN|0.0718;MSN|3.9084;MYLK|0.7516;DPP4|2.3335;S100A9|0.0619;OLFM4|10.7647;VTN|0.0809;LCP1|3.5645;KRT2|13.0617;COL6A1|0.3162;ACE|8.2414;VCAM1|9.4624;HSPB1|0.3837;CTSH|0.4699;AQP1|0.0133;SERPINB3|0.0377;FOLR1|0.2188;HSPA8|2.3988;TFF2|0.2655;SPP1|0.1738;CDH13|0.1706;FN1|2.3988;CD63|5.7016;SLC9A3R1|3.8726;SORD|13.1826;TIMP1|18.197;IL1RN|0.2729;AP…	38	2047	185	38520	http://www.ebi.ac.uk/QuickGO/GTerm?id=GO:0040011	[]
5	4,5	multicellular organismal homeostasis	GO:0048871	7.26e-13	3.94e-11	-12.01	-1.05	4.84136	-12.6834	KRT16|0.1995;LTF|26.7917;HSPB1|0.3837;CTSH|0.4699;AQP1|0.0133;LYZ|0.5346;SERPINA3|0.3436;CUBN|0.1067;SPP1|0.1738;PRDX1|2.9107;CA2|8.7096;SOD1|5.7016;IL1RN|0.2729;IGHG3|0.2992;AZGP1|1.2246;PRCP|0.0685;IGHA2|1.977	17	334	185	38520	http://www.ebi.ac.uk/QuickGO/GTerm?id=GO:0048871	[]
5	5	negative regulation of protein metabolic process	GO:0051248	8.59e-13	4.59e-11	-23.28	-2.15	4.84136	-12.6834	CST6|0.0614;CSTA|0.177;SERPINC1|0.6026;VTN|0.0809;SERPINB13|0.3373;AHSG|0.1432;HSPB1|0.3837;AQP1|0.0133;PRG4|0.3631;SERPINB3|0.0377;SERPINA5|0.0698;PARK7|5.9704;A2ML1|0.2168;SERPINA6|0.3873;SERPINA3|0.3436;SPINK5|0.1406;CRYAB|0.2333;GAPDH|2.2699;SERPINA1|0.6546;SLC9A3R1|3.8726;SERPINI1|12.1339;SERPINA7|0.2188;SPINK1|0.0113;TIMP1|18.197;APOE|0.5105;C3|1.3804;A2M|22.9087;PI16|0.182;C4A|0.3467;APOA4…	30	1288	185	38520	http://www.ebi.ac.uk/QuickGO/GTerm?id=GO:0051248	[]
4	4	cell migration	GO:0016477	9.46e-13	4.98e-11	-24.48	-2.27	4.84136	-12.6834	KRT16|0.1995;CD177|2.1878;GSN|0.0718;MSN|3.9084;MYLK|0.7516;DPP4|2.3335;S100A9|0.0619;OLFM4|10.7647;VTN|0.0809;LCP1|3.5645;KRT2|13.0617;ACE|8.2414;VCAM1|9.4624;HSPB1|0.3837;CTSH|0.4699;AQP1|0.0133;SERPINB3|0.0377;FOLR1|0.2188;TFF2|0.2655;SPP1|0.1738;CDH13|0.1706;FN1|2.3988;CD63|5.7016;SLC9A3R1|3.8726;TIMP1|18.197;IL1RN|0.2729;APOE|0.5105;SH3BGRL3|0.0409;APOA1|10.8643;S100A8|0.1644;HEXB|1.3804;SLC…	32	1478	185	38520	http://www.ebi.ac.uk/QuickGO/GTerm?id=GO:0016477	[]
5	5	regulation of hydrolase activity	GO:0051336	9.83e-13	5.11e-11	-31.86	-3	4.84136	-12.6834	SEMG1|41.6869;CST6|0.0614;CD14|0.8241;CSTA|0.177;GSN|0.0718;SERPINC1|0.6026;S100A9|0.0619;VTN|0.0809;LTF|26.7917;SERPINB13|0.3373;AHSG|0.1432;CTSC|0.3076;CTSH|0.4699;AQP1|0.0133;SERPINB3|0.0377;SERPINA5|0.0698;PARK7|5.9704;A2ML1|0.2168;SERPINA6|0.3873;SERPINA3|0.3436;SPINK5|0.1406;CRYAB|0.2333;FN1|2.3988;SERPINA1|0.6546;SERPINI1|12.1339;SERPINA7|0.2188;SPINK1|0.0113;TIMP1|18.197;SOD1|5.7016;SH3BG…	37	1979	185	38520	http://www.ebi.ac.uk/QuickGO/GTerm?id=GO:0051336	[]
5	5	vesicle-mediated transport	GO:0016192	1.38e-12	7.07e-11	-29.32	-2.75	4.84136	-12.6834	VWF|1.3804;CD14|0.8241;HBB|1.6749;HSP90AA1|2.466;ALDOA|2.9923;GSN|0.0718;P06314|0.0809;PDCD6IP|2.0701;MSN|3.9084;OLFM4|10.7647;VTN|0.0809;HBA1|1.5996;AHSG|0.1432;PRG4|0.3631;RDX|1.5704;FOLR1|0.2188;HP|34.3558;HSPA8|2.3988;CUBN|0.1067;LMAN2|0.2466;EGF|0.7943;CDH13|0.1706;FN1|2.3988;SERPINA1|0.6546;CD63|5.7016;LRP2|0.1459;LAMP1|2.6062;P01594|0.0643;SPINK1|0.0113;TIMP1|18.197;SOD1|5.7016;APOE|0.5105…	42	2550	185	38520	http://www.ebi.ac.uk/QuickGO/GTerm?id=GO:0016192	[]
5	5	regulation of defense response	GO:0031347	1.6e-12	8.1e-11	-16.69	-1.51	4.84136	-12.6834	CTSB|0.3105;CD14|0.8241;MYLK|0.7516;MDH1|2.7542;SERPINC1|0.6026;S100A9|0.0619;PGLYRP1|0.1722;VTN|0.0809;LTF|26.7917;PGLYRP2|0.3945;AHSG|0.1432;PARK7|5.9704;TFF2|0.2655;LAMP1|2.6062;APOE|0.5105;ANXA5|14.0605;APOA1|10.8643;S100A8|0.1644;C3|1.3804;A2M|22.9087;KRT6A|0.1127;SCGB1A1|8.5507;C4A|0.3467;GGT1|5.0582	24	814	185	38520	http://www.ebi.ac.uk/QuickGO/GTerm?id=GO:0031347	[]
6	5,6	regulation of inflammatory response	GO:0050727	1.74e-12	8.67e-11	-11.59	-1	4.84136	-12.6834	SERPINC1|0.6026;S100A9|0.0619;PGLYRP1|0.1722;VTN|0.0809;PGLYRP2|0.3945;AHSG|0.1432;PARK7|5.9704;TFF2|0.2655;APOE|0.5105;APOA1|10.8643;S100A8|0.1644;C3|1.3804;A2M|22.9087;SCGB1A1|8.5507;C4A|0.3467;GGT1|5.0582	16	300	185	38520	http://www.ebi.ac.uk/QuickGO/GTerm?id=GO:0050727	[]
3	3	positive regulation of cellular process	GO:0048522	1.76e-12	8.68e-11	47.87	4.84	4.84136	-12.6834	SEMG1|41.6869;LASP1|0.0281;PDZK1|11.695;CD14|0.8241;HBB|1.6749;HSP90AA1|2.466;GSN|0.0718;LUM|0.2421;LRG1|0.8017;PDCD6IP|2.0701;MSN|3.9084;MYLK|0.7516;MDH1|2.7542;REG1A|0.0258;DPP4|2.3335;S100A9|0.0619;OLFM4|10.7647;VTN|0.0809;LTF|26.7917;LCP1|3.5645;HBA1|1.5996;AHSG|0.1432;CTSC|0.3076;ACE|8.2414;VCAM1|9.4624;HSPB1|0.3837;CTSH|0.4699;AQP1|0.0133;RDX|1.5704;SERPINB3|0.0377;PARK7|5.9704;YWHAZ|2.704;…	65	5573	185	38520	http://www.ebi.ac.uk/QuickGO/GTerm?id=GO:0048522	[]
2	2	localization	GO:0051179	1.86e-12	9.05e-11	-70.56	-6.8	4.84136	-12.6834	KRT16|0.1995;VWF|1.3804;SEMG1|41.6869;LASP1|0.0281;PDZK1|11.695;CD177|2.1878;CD14|0.8241;HBB|1.6749;HSP90AA1|2.466;GAA|0.6026;ALDOA|2.9923;GSN|0.0718;P06314|0.0809;PDCD6IP|2.0701;MSN|3.9084;MYLK|0.7516;DPP4|2.3335;S100A9|0.0619;OLFM4|10.7647;VTN|0.0809;LTF|26.7917;LCP1|3.5645;KRT2|13.0617;HBA1|1.5996;AHSG|0.1432;ACE|8.2414;VCAM1|9.4624;HSPB1|0.3837;CTSH|0.4699;AQP1|0.0133;HBD|25.5859;PRG4|0.3631;…	93	10064	185	38520	http://www.ebi.ac.uk/QuickGO/GTerm?id=GO:0051179	[]
4	4	regulation of response to external stimulus	GO:0032101	2.09e-12	1e-10	-18.03	-1.64	4.84136	-12.6834	MYLK|0.7516;MDH1|2.7542;SERPINC1|0.6026;S100A9|0.0619;PGLYRP1|0.1722;VTN|0.0809;LTF|26.7917;PGLYRP2|0.3945;AHSG|0.1432;HSPB1|0.3837;PARK7|5.9704;TFF2|0.2655;SPP1|0.1738;CDH13|0.1706;APOE|0.5105;ANXA5|14.0605;APOA1|10.8643;S100A8|0.1644;C3|1.3804;A2M|22.9087;KRT6A|0.1127;PLG|0.3908;SCGB1A1|8.5507;C4A|0.3467;GGT1|5.0582	25	903	185	38520	http://www.ebi.ac.uk/QuickGO/GTerm?id=GO:0032101	[]
2	2	multi-organism process	GO:0051704	2.43e-12	1.15e-10	0.87	0.22	4.84136	-12.6834	SEMG1|41.6869;CTSB|0.3105;CD14|0.8241;GSN|0.0718;PDCD6IP|2.0701;MYLK|0.7516;MDH1|2.7542;DPP4|2.3335;S100A9|0.0619;PGLYRP1|0.1722;LTF|26.7917;PGLYRP2|0.3945;ACE|8.2414;VCAM1|9.4624;HSPB1|0.3837;AQP1|0.0133;LYZ|0.5346;SERPINB3|0.0377;KLK3|65.4636;SERPINA5|0.0698;PARK7|5.9704;HP|34.3558;HSPA8|2.3988;SPP1|0.1738;DCD|4.9204;HLA-DRA|1.406;IGFBP2|0.0698;LAMP1|2.6062;SPINK1|0.0113;TIMP1|18.197;SOD1|5.701…	42	2595	185	38520	http://www.ebi.ac.uk/QuickGO/GTerm?id=GO:0051704	[]
4	4	regulation of cellular component movement	GO:0051270	2.5e-12	1.17e-10	-19.57	-1.79	4.84136	-12.6834	KRT16|0.1995;SEMG1|41.6869;GSN|0.0718;MSN|3.9084;MYLK|0.7516;OLFM4|10.7647;VTN|0.0809;ACE|8.2414;HSPB1|0.3837;CTSH|0.4699;AQP1|0.0133;SERPINB3|0.0377;TFF2|0.2655;DSC2|0.118;CDH13|0.1706;FN1|2.3988;SLC9A3R1|3.8726;LAMP1|2.6062;TIMP1|18.197;IL1RN|0.2729;APOE|0.5105;SH3BGRL3|0.0409;ANXA5|14.0605	23	755	185	38520	http://www.ebi.ac.uk/QuickGO/GTerm?id=GO:0051270	[]
3	3	regulation of multicellular organismal process	GO:0051239	2.78e-12	1.28e-10	-34.26	-3.23	4.84136	-12.6834	CD14|0.8241;GAA|0.6026;LUM|0.2421;LRG1|0.8017;SERPINC1|0.6026;S100A9|0.0619;PGLYRP1|0.1722;VTN|0.0809;LTF|26.7917;PGLYRP2|0.3945;AHSG|0.1432;ACE|8.2414;HSPB1|0.3837;CTSH|0.4699;AQP1|0.0133;PRG4|0.3631;SERPINB3|0.0377;KLK3|65.4636;PARK7|5.9704;EGF|0.7943;SPINK5|0.1406;TFF2|0.2655;DSC2|0.118;SPP1|0.1738;FN1|2.3988;ACPP|64.2688;SLC9A3R1|3.8726;CA2|8.7096;VASN|0.0982;TIMP1|18.197;SOD1|5.7016;IL1RN|0.…	43	2722	185	38520	http://www.ebi.ac.uk/QuickGO/GTerm?id=GO:0051239	[]
5	5	regulation of protein metabolic process	GO:0051246	3.59e-12	1.64e-10	-36.32	-3.43	4.84136	-12.6834	SEMG1|41.6869;CST6|0.0614;CD14|0.8241;MME|2.2284;CSTA|0.177;GSN|0.0718;MSN|3.9084;SERPINC1|0.6026;S100A9|0.0619;VTN|0.0809;LTF|26.7917;SERPINB13|0.3373;AHSG|0.1432;CTSC|0.3076;ACE|8.2414;HSPB1|0.3837;CTSH|0.4699;AQP1|0.0133;PRG4|0.3631;RDX|1.5704;SERPINB3|0.0377;SERPINA5|0.0698;PARK7|5.9704;A2ML1|0.2168;SERPINA6|0.3873;SERPINA3|0.3436;EGF|0.7943;SPINK5|0.1406;TFF2|0.2655;CRYAB|0.2333;GAPDH|2.2699…	49	3475	185	38520	http://www.ebi.ac.uk/QuickGO/GTerm?id=GO:0051246	[]
5	3,4,5	protein activation cascade	GO:0072376	3.69e-12	1.66e-10	-11.52	-1	4.84136	-12.6834	VWF|1.3804;P06314|0.0809;SERPINC1|0.6026;VTN|0.0809;MASP2|0.4446;P01594|0.0643;IGHG3|0.2992;C3|1.3804;A2M|22.9087;PRCP|0.0685;C4A|0.3467;P01614|0.7727;P01616|0.0145;P01617|0.0146	14	218	185	38520	http://www.ebi.ac.uk/QuickGO/GTerm?id=GO:0072376	[]
4	4	regulation of catalytic activity	GO:0050790	4.11e-12	1.83e-10	-39.59	-3.76	4.84136	-12.6834	SEMG1|41.6869;CST6|0.0614;CTSB|0.3105;CD14|0.8241;HSP90AA1|2.466;CSTA|0.177;GSN|0.0718;SERPINC1|0.6026;S100A9|0.0619;VTN|0.0809;LTF|26.7917;SERPINB13|0.3373;AHSG|0.1432;CTSC|0.3076;ACE|8.2414;HSPB1|0.3837;CTSH|0.4699;AQP1|0.0133;SERPINB3|0.0377;SERPINA5|0.0698;PARK7|5.9704;HP|34.3558;A2ML1|0.2168;SERPINA6|0.3873;SERPINA3|0.3436;EGF|0.7943;CTSA|0.4571;SPINK5|0.1406;CRYAB|0.2333;FN1|2.3988;SERPINA1…	49	3488	185	38520	http://www.ebi.ac.uk/QuickGO/GTerm?id=GO:0050790	[]
6	6	endocytosis	GO:0006897	4.72e-12	2.07e-10	-20.41	-1.87	4.84136	-12.6834	CD14|0.8241;HBB|1.6749;HSP90AA1|2.466;GSN|0.0718;P06314|0.0809;OLFM4|10.7647;VTN|0.0809;HBA1|1.5996;AHSG|0.1432;PRG4|0.3631;FOLR1|0.2188;HP|34.3558;CUBN|0.1067;LMAN2|0.2466;CDH13|0.1706;CD63|5.7016;LRP2|0.1459;P01594|0.0643;APOE|0.5105;APOA1|10.8643;IGHG3|0.2992;C3|1.3804;C4A|0.3467;P01614|0.7727;P01616|0.0145;P01617|0.0146;IGHA2|1.977	27	1107	185	38520	http://www.ebi.ac.uk/QuickGO/GTerm?id=GO:0006897	[]
3	3	immune effector process	GO:0002252	5.44e-12	2.36e-10	-18.44	-1.68	4.84136	-12.6834	HSP90AA1|2.466;P06314|0.0809;MYLK|0.7516;MDH1|2.7542;PGLYRP1|0.1722;VTN|0.0809;LCP1|3.5645;PGLYRP2|0.3945;CTSC|0.3076;ACE|8.2414;CTSH|0.4699;MASP2|0.4446;PRDX1|2.9107;LAMP1|2.6062;P01594|0.0643;ANXA5|14.0605;APOA1|10.8643;IGHG3|0.2992;C3|1.3804;A2M|22.9087;KRT6A|0.1127;C4A|0.3467;P01614|0.7727;P01616|0.0145;P01617|0.0146	25	944	185	38520	http://www.ebi.ac.uk/QuickGO/GTerm?id=GO:0002252	[]
5	5	platelet activation	GO:0030168	5.77e-12	2.47e-10	8.22	0.94	4.84136	-12.6834	VWF|1.3804;HBB|1.6749;ALDOA|2.9923;HSPB1|0.3837;YWHAZ|2.704;EGF|0.7943;FN1|2.3988;SERPINA1|0.6546;CD63|5.7016;TIMP1|18.197;SOD1|5.7016;APOE|0.5105;APOA1|10.8643;A2M|22.9087;PLG|0.3908	15	273	185	38520	http://www.ebi.ac.uk/QuickGO/GTerm?id=GO:0030168	[]
4	4	humoral immune response	GO:0006959	5.83e-12	2.47e-10	-16.25	-1.46	4.84136	-12.6834	SEMG1|41.6869;P06314|0.0809;VTN|0.0809;LTF|26.7917;KLK3|65.4636;MASP2|0.4446;P01594|0.0643;IGHG3|0.2992;MMP7|0.0817;C3|1.3804;A2M|22.9087;C4A|0.3467;P01614|0.7727;P01616|0.0145;P01617|0.0146;IGHA2|1.977	16	325	185	38520	http://www.ebi.ac.uk/QuickGO/GTerm?id=GO:0006959	[]
6	6	acute inflammatory response	GO:0002526	6.27e-12	2.63e-10	-8.97	-0.75	4.84136	-12.6834	VTN|0.0809;AHSG|0.1432;HP|34.3558;SERPINA3|0.3436;FN1|2.3988;SERPINA1|0.6546;IL1RN|0.2729;S100A8|0.1644;C3|1.3804;A2M|22.9087;PRCP|0.0685;C4A|0.3467	12	144	185	38520	http://www.ebi.ac.uk/QuickGO/GTerm?id=GO:0002526	[]
5	5	response to alcohol	GO:0097305	6.39e-12	2.65e-10	-12.05	-1.05	4.84136	-12.6834	CTSB|0.3105;CD14|0.8241;GSN|0.0718;MSN|3.9084;S100A9|0.0619;AQP1|0.0133;GGH|0.492;CRYAB|0.2333;CDH1|0.8091;SPP1|0.1738;CAT|22.4905;SERPINA7|0.2188;IGFBP2|0.0698;SOD1|5.7016;S100A8|0.1644;C3|1.3804	16	327	185	38520	http://www.ebi.ac.uk/QuickGO/GTerm?id=GO:0097305	[]
7	7	receptor-mediated endocytosis	GO:0006898	7.38e-12	3.02e-10	-14.89	-1.33	4.84136	-12.6834	CD14|0.8241;HBB|1.6749;HSP90AA1|2.466;P06314|0.0809;VTN|0.0809;HBA1|1.5996;PRG4|0.3631;FOLR1|0.2188;HP|34.3558;CUBN|0.1067;CD63|5.7016;LRP2|0.1459;P01594|0.0643;APOE|0.5105;APOA1|10.8643;P01614|0.7727;P01616|0.0145;P01617|0.0146;IGHA2|1.977	19	510	185	38520	http://www.ebi.ac.uk/QuickGO/GTerm?id=GO:0006898	[]
6	5,6	negative regulation of cellular protein metabolic process	GO:0032269	7.62e-12	3.09e-10	-22.33	-2.06	4.84136	-12.6834	CST6|0.0614;CSTA|0.177;SERPINC1|0.6026;VTN|0.0809;SERPINB13|0.3373;AHSG|0.1432;HSPB1|0.3837;AQP1|0.0133;SERPINB3|0.0377;SERPINA5|0.0698;PARK7|5.9704;A2ML1|0.2168;SERPINA6|0.3873;SERPINA3|0.3436;SPINK5|0.1406;CRYAB|0.2333;GAPDH|2.2699;SERPINA1|0.6546;SLC9A3R1|3.8726;SERPINI1|12.1339;SERPINA7|0.2188;SPINK1|0.0113;TIMP1|18.197;APOE|0.5105;C3|1.3804;A2M|22.9087;PI16|0.182;C4A|0.3467	28	1220	185	38520	http://www.ebi.ac.uk/QuickGO/GTerm?id=GO:0032269	[]
3	3	anatomical structure morphogenesis	GO:0009653	1.01e-11	4.04e-10	-34.18	-3.22	4.84136	-12.6834	KRT16|0.1995;CST6|0.0614;HSP90AA1|2.466;GAA|0.6026;ALDOA|2.9923;GSN|0.0718;LRG1|0.8017;MSN|3.9084;MYLK|0.7516;OLFM4|10.7647;VTN|0.0809;LTF|26.7917;LCP1|3.5645;COL6A1|0.3162;HSPB1|0.3837;CTSH|0.4699;AQP1|0.0133;CPM|3.8371;SERPINB3|0.0377;KLK3|65.4636;FOLR1|0.2188;KRT13|0.0373;HSPA8|2.3988;COL15A1|0.1556;EGF|0.7943;SPINK5|0.1406;CRYAB|0.2333;SPP1|0.1738;PAPPA2|8.8716;CDH13|0.1706;FN1|2.3988;SLC9A3R…	46	3197	185	38520	http://www.ebi.ac.uk/QuickGO/GTerm?id=GO:0009653	[]
4	4	response to oxidative stress	GO:0006979	1.66e-11	6.55e-10	14.61	1.57	4.84136	-12.6834	HBB|1.6749;PRDX6|8.9536;HBA1|1.5996;HSPB1|0.3837;AQP1|0.0133;PARK7|5.9704;HP|34.3558;CRYAB|0.2333;PRDX2|57.0164;PRDX1|2.9107;PTPRN|0.7047;CAT|22.4905;SOD1|5.7016;APOE|0.5105;SCGB1A1|8.5507;APOA4|3.2211;SOD3|8.7902;IDH1|6.9183	18	469	185	38520	http://www.ebi.ac.uk/QuickGO/GTerm?id=GO:0006979	[]
4	3,4	single organism cell adhesion	GO:0098602	1.67e-11	6.55e-10	2.14	0.35	4.84136	-12.6834	HBB|1.6749;CSTA|0.177;GSN|0.0718;MSN|3.9084;DPP4|2.3335;S100A9|0.0619;OLFM4|10.7647;LCP1|3.5645;VCAM1|9.4624;HSPB1|0.3837;SPINK5|0.1406;DSC2|0.118;CDH1|0.8091;FN1|2.3988;CRNN|0.0453;HLA-DRA|1.406;IGFBP2|0.0698;SOD1|5.7016;IL1RN|0.2729;APOA1|10.8643;S100A8|0.1644;PLG|0.3908;SCGB1A1|8.5507;APOA4|3.2211	24	911	185	38520	http://www.ebi.ac.uk/QuickGO/GTerm?id=GO:0098602	[]
5	5	epithelium development	GO:0060429	1.72e-11	6.69e-10	-21.43	-1.97	4.84136	-12.6834	KRT16|0.1995;CST6|0.0614;CTSB|0.3105;CSTA|0.177;GSN|0.0718;MSN|3.9084;LCP1|3.5645;KRT2|13.0617;CTSH|0.4699;AQP1|0.0133;PGK1|2.0324;RDX|1.5704;FOLR1|0.2188;FABP5|0.0296;KRT10|5.3951;KRT5|0.3802;EGF|0.7943;SPINK5|0.1406;KRT4|0.0817;SLC9A3R1|3.8726;CA2|8.7096;CAT|22.4905;SOD1|5.7016;KRT6A|0.1127;SPRR3|0.5495;SPRR1A|0.0555;SPRR2A|0.2148	27	1172	185	38520	http://www.ebi.ac.uk/QuickGO/GTerm?id=GO:0060429	[]
4	4	regulation of cell motility	GO:2000145	1.76e-11	6.74e-10	-18.23	-1.66	4.84136	-12.6834	KRT16|0.1995;SEMG1|41.6869;GSN|0.0718;MSN|3.9084;MYLK|0.7516;OLFM4|10.7647;VTN|0.0809;ACE|8.2414;HSPB1|0.3837;CTSH|0.4699;AQP1|0.0133;SERPINB3|0.0377;TFF2|0.2655;CDH13|0.1706;FN1|2.3988;SLC9A3R1|3.8726;TIMP1|18.197;IL1RN|0.2729;APOE|0.5105;SH3BGRL3|0.0409;ANXA5|14.0605	21	678	185	38520	http://www.ebi.ac.uk/QuickGO/GTerm?id=GO:2000145	[]
4	4	cellular catabolic process	GO:0044248	1.84e-11	7.02e-10	29.56	3.04	4.84136	-12.6834	UBA1|0.0107;CTSB|0.3105;HBB|1.6749;CPQ|0.3565;GAA|0.6026;LUM|0.2421;PDCD6IP|2.0701;MSN|3.9084;MYLK|0.7516;MDH1|2.7542;MGAM|3.5318;PRDX6|8.9536;S100A9|0.0619;HBA1|1.5996;CTSC|0.3076;ACE|8.2414;CTSH|0.4699;BGN|0.1995;RDX|1.5704;FABP5|0.0296;PARK7|5.9704;HP|34.3558;EGF|0.7943;BHMT|0.8166;PRDX2|57.0164;GLB1|0.52;PRDX1|2.9107;GNS|0.4246;SORD|13.1826;CAT|22.4905;LAMP1|2.6062;TIMP1|18.197;APOE|0.5105;AN…	43	2885	185	38520	http://www.ebi.ac.uk/QuickGO/GTerm?id=GO:0044248	[]
4	4	organonitrogen compound metabolic process	GO:1901564	1.96e-11	7.36e-10	13.92	1.5	4.84136	-12.6834	MME|2.2284;PKM|4.9659;CPQ|0.3565;ALDOA|2.9923;LUM|0.2421;MDH1|2.7542;S100A9|0.0619;CNDP2|2.6303;PGLYRP1|0.1722;PGLYRP2|0.3945;ACE|8.2414;VCAM1|9.4624;HSPB1|0.3837;CTSH|0.4699;AQP1|0.0133;GGH|0.492;PGK1|2.0324;BGN|0.1995;CKB|15.1356;FOLR1|0.2188;FABP5|0.0296;PARK7|5.9704;HSPA8|2.3988;CUBN|0.1067;EGF|0.7943;CTSA|0.4571;APEH|1.7061;AOC1|2.0701;TPI1|2.0893;GAPDH|2.2699;BHMT|0.8166;GLB1|0.52;ACPP|64.2…	49	3643	185	38520	http://www.ebi.ac.uk/QuickGO/GTerm?id=GO:1901564	[]
6	5,6	regulation of cellular protein metabolic process	GO:0032268	2.89e-11	1.08e-09	-35.02	-3.31	4.84136	-12.6834	SEMG1|41.6869;CST6|0.0614;CD14|0.8241;CSTA|0.177;GSN|0.0718;MSN|3.9084;SERPINC1|0.6026;S100A9|0.0619;VTN|0.0809;LTF|26.7917;SERPINB13|0.3373;AHSG|0.1432;CTSC|0.3076;ACE|8.2414;HSPB1|0.3837;CTSH|0.4699;AQP1|0.0133;RDX|1.5704;SERPINB3|0.0377;SERPINA5|0.0698;PARK7|5.9704;A2ML1|0.2168;SERPINA6|0.3873;SERPINA3|0.3436;EGF|0.7943;SPINK5|0.1406;TFF2|0.2655;CRYAB|0.2333;GAPDH|2.2699;FN1|2.3988;SERPINA1|0.…	46	3298	185	38520	http://www.ebi.ac.uk/QuickGO/GTerm?id=GO:0032268	[]
4	4	reactive oxygen species metabolic process	GO:0072593	3.19e-11	1.18e-09	11.66	1.28	4.84136	-12.6834	HBB|1.6749;HSP90AA1|2.466;PRDX6|8.9536;HBA1|1.5996;PARK7|5.9704;HP|34.3558;CRYAB|0.2333;PRDX2|57.0164;PRDX1|2.9107;CAT|22.4905;SOD1|5.7016;PRCP|0.0685;APOA4|3.2211;SOD3|8.7902	14	256	185	38520	http://www.ebi.ac.uk/QuickGO/GTerm?id=GO:0072593	[]
4	4	organic substance catabolic process	GO:1901575	3.97e-11	1.45e-09	-2.75	-0.14	4.84136	-12.6834	UBA1|0.0107;CTSB|0.3105;PKM|4.9659;CPQ|0.3565;GAA|0.6026;ALDOA|2.9923;LUM|0.2421;PDCD6IP|2.0701;MSN|3.9084;MGAM|3.5318;PRDX6|8.9536;PGLYRP1|0.1722;PGLYRP2|0.3945;CTSC|0.3076;ACE|8.2414;CTSH|0.4699;PGK1|2.0324;BGN|0.1995;RDX|1.5704;FABP5|0.0296;PARK7|5.9704;PGA3|0.2208;EGF|0.7943;TPI1|2.0893;GAPDH|2.2699;BHMT|0.8166;GLB1|0.52;GNS|0.4246;SORD|13.1826;CAT|22.4905;TIMP1|18.197;APOE|0.5105;APOA1|10.86…	42	2833	185	38520	http://www.ebi.ac.uk/QuickGO/GTerm?id=GO:1901575	[]
3	3	single-organism cellular process	GO:0044763	4.31e-11	1.56e-09	-113.4	-11.01	4.84136	-12.6834	KRT16|0.1995;VWF|1.3804;IGFBP7|0.0824;PCDH1|0.4285;SEMG1|41.6869;LASP1|0.0281;CTSB|0.3105;PDZK1|11.695;CD177|2.1878;CD14|0.8241;HBB|1.6749;HSP90AA1|2.466;MME|2.2284;CSTA|0.177;PKM|4.9659;GAA|0.6026;ALDOA|2.9923;GSN|0.0718;LUM|0.2421;P06314|0.0809;LRG1|0.8017;PDCD6IP|2.0701;MSN|3.9084;MYLK|0.7516;MDH1|2.7542;MGAM|3.5318;DPP4|2.3335;PRDX6|8.9536;S100A9|0.0619;DDT|4.5709;OLFM4|10.7647;CNDP2|2.6303;P…	151	22761	185	38520	http://www.ebi.ac.uk/QuickGO/GTerm?id=GO:0044763	[]
6	5,6	tissue homeostasis	GO:0001894	4.46e-11	1.6e-09	-3.97	-0.26	4.84136	-12.6834	LTF|26.7917;HSPB1|0.3837;CTSH|0.4699;LYZ|0.5346;SERPINA3|0.3436;CUBN|0.1067;SPP1|0.1738;PRDX1|2.9107;CA2|8.7096;SOD1|5.7016;IGHG3|0.2992;AZGP1|1.2246;IGHA2|1.977	13	214	185	38520	http://www.ebi.ac.uk/QuickGO/GTerm?id=GO:0001894	[]
4	4	regulation of transport	GO:0051049	6.32e-11	2.24e-09	1.43	0.28	4.84136	-12.6834	SEMG1|41.6869;PDZK1|11.695;CD14|0.8241;PDCD6IP|2.0701;MSN|3.9084;MYLK|0.7516;S100A9|0.0619;OLFM4|10.7647;VTN|0.0809;LCP1|3.5645;AHSG|0.1432;AQP1|0.0133;AHNAK|0.0643;RDX|1.5704;PARK7|5.9704;YWHAZ|2.704;LMAN2|0.2466;EGF|0.7943;TFF2|0.2655;CRYAB|0.2333;CDH1|0.8091;CDH13|0.1706;FN1|2.3988;CD63|5.7016;SLC9A3R1|3.8726;PRDX1|2.9107;CA2|8.7096;LAMP1|2.6062;SPINK1|0.0113;IL1RN|0.2729;APOE|0.5105;APOA1|10.…	36	2172	185	38520	http://www.ebi.ac.uk/QuickGO/GTerm?id=GO:0051049	[]
3	3	regulation of molecular function	GO:0065009	7.47e-11	2.63e-09	-42.14	-4.01	4.84136	-12.6834	SEMG1|41.6869;CST6|0.0614;CTSB|0.3105;CD14|0.8241;HSP90AA1|2.466;CSTA|0.177;GSN|0.0718;SERPINC1|0.6026;S100A9|0.0619;VTN|0.0809;LTF|26.7917;SERPINB13|0.3373;AHSG|0.1432;CTSC|0.3076;ACE|8.2414;HSPB1|0.3837;CTSH|0.4699;AQP1|0.0133;AHNAK|0.0643;SERPINB3|0.0377;SERPINA5|0.0698;PARK7|5.9704;HP|34.3558;A2ML1|0.2168;SERPINA6|0.3873;SERPINA3|0.3436;EGF|0.7943;CTSA|0.4571;SPINK5|0.1406;CRYAB|0.2333;FN1|2.…	51	4052	185	38520	http://www.ebi.ac.uk/QuickGO/GTerm?id=GO:0065009	[]
4	4	cellular response to chemical stimulus	GO:0070887	8.65e-11	3.01e-09	-34.01	-3.21	4.84136	-12.6834	CTSB|0.3105;CD14|0.8241;MME|2.2284;GSN|0.0718;LRG1|0.8017;MSN|3.9084;S100A9|0.0619;CNDP2|2.6303;VTN|0.0809;LTF|26.7917;COL6A1|0.3162;AHSG|0.1432;VCAM1|9.4624;HSPB1|0.3837;CTSH|0.4699;AQP1|0.0133;FOLR1|0.2188;PARK7|5.9704;KRT10|5.3951;KRT13|0.0373;HP|34.3558;EGF|0.7943;TFF2|0.2655;AOC1|2.0701;CDH1|0.8091;SPP1|0.1738;GAPDH|2.2699;PRDX2|57.0164;CDH13|0.1706;CD63|5.7016;PRDX1|2.9107;FBN1|0.1585;PTPRN…	45	3280	185	38520	http://www.ebi.ac.uk/QuickGO/GTerm?id=GO:0070887	[]
3	3	regulation of locomotion	GO:0040012	9.67e-11	3.34e-09	-18.23	-1.66	4.84136	-12.6834	KRT16|0.1995;SEMG1|41.6869;GSN|0.0718;MSN|3.9084;MYLK|0.7516;OLFM4|10.7647;VTN|0.0809;ACE|8.2414;HSPB1|0.3837;CTSH|0.4699;AQP1|0.0133;SERPINB3|0.0377;TFF2|0.2655;CDH13|0.1706;FN1|2.3988;SLC9A3R1|3.8726;TIMP1|18.197;IL1RN|0.2729;APOE|0.5105;SH3BGRL3|0.0409;ANXA5|14.0605	21	744	185	38520	http://www.ebi.ac.uk/QuickGO/GTerm?id=GO:0040012	[]
4	4	regulation of immune response	GO:0050776	1.43e-10	4.88e-09	-18.56	-1.69	4.84136	-12.6834	CTSB|0.3105;CD14|0.8241;HSP90AA1|2.466;P06314|0.0809;OLFM4|10.7647;PGLYRP1|0.1722;VTN|0.0809;LTF|26.7917;PGLYRP2|0.3945;VCAM1|9.4624;CTSH|0.4699;EGF|0.7943;SPINK5|0.1406;CDH1|0.8091;MASP2|0.4446;HLA-DRA|1.406;LAMP1|2.6062;P01594|0.0643;APOA1|10.8643;IGHG3|0.2992;C3|1.3804;A2M|22.9087;C4A|0.3467;P01614|0.7727;P01616|0.0145;P01617|0.0146	26	1194	185	38520	http://www.ebi.ac.uk/QuickGO/GTerm?id=GO:0050776	[]
3	3	cellular component organization	GO:0016043	1.51e-10	5.11e-09	-61.59	-5.92	4.84136	-12.6834	KRT16|0.1995;VWF|1.3804;IGFBP7|0.0824;SEMG1|41.6869;CTSB|0.3105;PDZK1|11.695;CD14|0.8241;HBB|1.6749;HSP90AA1|2.466;GAA|0.6026;ALDOA|2.9923;GSN|0.0718;LUM|0.2421;PDCD6IP|2.0701;MSN|3.9084;MYLK|0.7516;MDH1|2.7542;DPP4|2.3335;S100A9|0.0619;OLFM4|10.7647;VTN|0.0809;LTF|26.7917;LCP1|3.5645;COL6A1|0.3162;HBA1|1.5996;BRD1|0.0125;AHSG|0.1432;ACE|8.2414;VCAM1|9.4624;AQP1|0.0133;AHNAK|0.0643;BGN|0.1995;RDX…	83	9076	185	38520	http://www.ebi.ac.uk/QuickGO/GTerm?id=GO:0016043	[]
3	3	response to endogenous stimulus	GO:0009719	1.59e-10	5.33e-09	-24.1	-2.23	4.84136	-12.6834	CTSB|0.3105;PKM|4.9659;GSN|0.0718;LRG1|0.8017;MSN|3.9084;COL6A1|0.3162;AHSG|0.1432;CTSH|0.4699;AQP1|0.0133;GGH|0.492;FOLR1|0.2188;EGF|0.7943;CRYAB|0.2333;AOC1|2.0701;CDH1|0.8091;SPP1|0.1738;CDH13|0.1706;SORD|13.1826;FBN1|0.1585;PTPRN|0.7047;CA2|8.7096;VASN|0.0982;CAT|22.4905;SERPINA7|0.2188;IGFBP2|0.0698;TIMP1|18.197;SOD1|5.7016;IL1RN|0.2729;APOA1|10.8643;C3|1.3804;PRCP|0.0685;SCGB1A1|8.5507;IDH1…	33	1911	185	38520	http://www.ebi.ac.uk/QuickGO/GTerm?id=GO:0009719	[]
5	5	response to organic cyclic compound	GO:0014070	1.82e-10	6.05e-09	-16.56	-1.49	4.84136	-12.6834	CTSB|0.3105;GSN|0.0718;LUM|0.2421;MSN|3.9084;AQP1|0.0133;FOLR1|0.2188;CRYAB|0.2333;AOC1|2.0701;CDH1|0.8091;SPP1|0.1738;PTPRN|0.7047;CA2|8.7096;CAT|22.4905;SERPINA7|0.2188;IGFBP2|0.0698;SOD1|5.7016;IL1RN|0.2729;APOA1|10.8643;C3|1.3804;SCGB1A1|8.5507;APOA4|3.2211;SLC3A2|0.4742;IDH1|6.9183	23	937	185	38520	http://www.ebi.ac.uk/QuickGO/GTerm?id=GO:0014070	[]
4	4	cellular component disassembly	GO:0022411	1.86e-10	6.12e-09	-15.72	-1.41	4.84136	-12.6834	CTSB|0.3105;GSN|0.0718;MYLK|0.7516;MDH1|2.7542;DPP4|2.3335;LCP1|3.5645;COL6A1|0.3162;RDX|1.5704;PARK7|5.9704;HSPA8|2.3988;NID1|0.5058;COL15A1|0.1556;CDH1|0.8091;SPP1|0.1738;FN1|2.3988;FBN1|0.1585;TIMP1|18.197;SH3BGRL3|0.0409;ANXA5|14.0605;MMP7|0.0817;A2M|22.9087;KRT6A|0.1127;PLG|0.3908	23	938	185	38520	http://www.ebi.ac.uk/QuickGO/GTerm?id=GO:0022411	[]
5	4,5	single organismal cell-cell adhesion	GO:0016337	2.11e-10	6.89e-09	-15.74	-1.41	4.84136	-12.6834	HBB|1.6749;CSTA|0.177;GSN|0.0718;MSN|3.9084;DPP4|2.3335;S100A9|0.0619;LCP1|3.5645;VCAM1|9.4624;HSPB1|0.3837;SPINK5|0.1406;DSC2|0.118;CDH1|0.8091;CRNN|0.0453;HLA-DRA|1.406;IGFBP2|0.0698;SOD1|5.7016;IL1RN|0.2729;APOA1|10.8643;S100A8|0.1644;PLG|0.3908;SCGB1A1|8.5507;APOA4|3.2211	22	859	185	38520	http://www.ebi.ac.uk/QuickGO/GTerm?id=GO:0016337	[]
5	5	anatomical structure homeostasis	GO:0060249	2.4e-10	7.77e-09	-4.45	-0.3	4.84136	-12.6834	GAA|0.6026;ALDOA|2.9923;LTF|26.7917;HSPB1|0.3837;CTSH|0.4699;LYZ|0.5346;SERPINA3|0.3436;CUBN|0.1067;SPP1|0.1738;PRDX1|2.9107;CA2|8.7096;SOD1|5.7016;IGHG3|0.2992;AZGP1|1.2246;IGHA2|1.977	15	356	185	38520	http://www.ebi.ac.uk/QuickGO/GTerm?id=GO:0060249	[]
5	4,5	innate immune response	GO:0045087	2.45e-10	7.85e-09	-19.89	-1.82	4.84136	-12.6834	KRT16|0.1995;CTSB|0.3105;CD14|0.8241;HSP90AA1|2.466;P06314|0.0809;S100A9|0.0619;PGLYRP1|0.1722;VTN|0.0809;LTF|26.7917;PGLYRP2|0.3945;VCAM1|9.4624;LCN2|0.2208;EGF|0.7943;GAPDH|2.2699;MASP2|0.4446;PRDX1|2.9107;HLA-DRA|1.406;LAMP1|2.6062;P01594|0.0643;S100A8|0.1644;IGHG3|0.2992;C3|1.3804;A2M|22.9087;C4A|0.3467;APOA4|3.2211;P01614|0.7727;P01616|0.0145;P01617|0.0146	28	1419	185	38520	http://www.ebi.ac.uk/QuickGO/GTerm?id=GO:0045087	[]
4	4	response to transition metal nanoparticle	GO:1990267	2.92e-10	9.3e-09	9.03	1.02	4.84136	-12.6834	S100A9|0.0619;AQP1|0.0133;GGH|0.492;PARK7|5.9704;AOC1|2.0701;SORD|13.1826;CA2|8.7096;SOD1|5.7016;S100A8|0.1644;SOD3|8.7902	10	117	185	38520	http://www.ebi.ac.uk/QuickGO/GTerm?id=GO:1990267	[]
5	5	regulation of cell migration	GO:0030334	3.73e-10	1.18e-08	-15.46	-1.38	4.84136	-12.6834	KRT16|0.1995;GSN|0.0718;MSN|3.9084;MYLK|0.7516;OLFM4|10.7647;VTN|0.0809;ACE|8.2414;HSPB1|0.3837;CTSH|0.4699;AQP1|0.0133;SERPINB3|0.0377;TFF2|0.2655;CDH13|0.1706;FN1|2.3988;SLC9A3R1|3.8726;TIMP1|18.197;IL1RN|0.2729;APOE|0.5105;SH3BGRL3|0.0409	19	643	185	38520	http://www.ebi.ac.uk/QuickGO/GTerm?id=GO:0030334	[]
4	4	cell-cell adhesion	GO:0098609	3.78e-10	1.18e-08	-17.38	-1.57	4.84136	-12.6834	PCDH1|0.4285;HBB|1.6749;CSTA|0.177;GSN|0.0718;MSN|3.9084;DPP4|2.3335;S100A9|0.0619;LCP1|3.5645;VCAM1|9.4624;HSPB1|0.3837;SPINK5|0.1406;DSC2|0.118;CDH1|0.8091;CDH13|0.1706;CRNN|0.0453;HLA-DRA|1.406;IGFBP2|0.0698;SOD1|5.7016;IL1RN|0.2729;APOA1|10.8643;S100A8|0.1644;PLG|0.3908;SCGB1A1|8.5507;CDH11|0.3105;APOA4|3.2211	25	1155	185	38520	http://www.ebi.ac.uk/QuickGO/GTerm?id=GO:0098609	[]
5	5	response to nutrient levels	GO:0031667	4.02e-10	1.25e-08	-16.18	-1.46	4.84136	-12.6834	PKM|4.9659;GSN|0.0718;MYLK|0.7516;MDH1|2.7542;SERPINC1|0.6026;FOLR1|0.2188;PARK7|5.9704;DSC2|0.118;AOC1|2.0701;SPP1|0.1738;SORD|13.1826;CAT|22.4905;SERPINA7|0.2188;IGFBP2|0.0698;SOD1|5.7016;IL1RN|0.2729;APOE|0.5105;ANXA5|14.0605;APOA1|10.8643;MMP7|0.0817;KRT6A|0.1127	21	805	185	38520	http://www.ebi.ac.uk/QuickGO/GTerm?id=GO:0031667	[]
3	3	positive regulation of transport	GO:0051050	4.27e-10	1.31e-08	-13.2	-1.16	4.84136	-12.6834	PDZK1|11.695;CD14|0.8241;PDCD6IP|2.0701;MSN|3.9084;MYLK|0.7516;S100A9|0.0619;VTN|0.0809;AHSG|0.1432;AQP1|0.0133;RDX|1.5704;PARK7|5.9704;YWHAZ|2.704;LMAN2|0.2466;EGF|0.7943;CDH1|0.8091;CD63|5.7016;CA2|8.7096;LAMP1|2.6062;APOE|0.5105;S100A8|0.1644;C3|1.3804;C4A|0.3467	22	892	185	38520	http://www.ebi.ac.uk/QuickGO/GTerm?id=GO:0051050	[]
3	3	response to abiotic stimulus	GO:0009628	5.21e-10	1.59e-08	-21.59	-1.99	4.84136	-12.6834	CTSB|0.3105;CD14|0.8241;HSP90AA1|2.466;MME|2.2284;PKM|4.9659;MYLK|0.7516;DPP4|2.3335;SERPINB13|0.3373;BRD1|0.0125;AQP1|0.0133;KRT13|0.0373;HSPA8|2.3988;CRYAB|0.2333;CRNN|0.0453;LRP2|0.1459;SORD|13.1826;CA2|8.7096;VASN|0.0982;CAT|22.4905;IGFBP2|0.0698;SOD1|5.7016;APOE|0.5105;APOA1|10.8643;MMP7|0.0817;APOA4|3.2211;SOD3|8.7902	26	1269	185	38520	http://www.ebi.ac.uk/QuickGO/GTerm?id=GO:0009628	[]
5	5	cell differentiation	GO:0030154	5.9e-10	1.78e-08	-38.38	-3.64	4.84136	-12.6834	KRT16|0.1995;CTSB|0.3105;HSP90AA1|2.466;CSTA|0.177;GSN|0.0718;LRG1|0.8017;MSN|3.9084;OLFM4|10.7647;PGLYRP1|0.1722;VTN|0.0809;LTF|26.7917;KRT2|13.0617;COL6A1|0.3162;PGLYRP2|0.3945;ACE|8.2414;VCAM1|9.4624;PGK1|2.0324;RDX|1.5704;SERPINB3|0.0377;FOLR1|0.2188;KRT10|5.3951;HSPA8|2.3988;COL15A1|0.1556;SPINK5|0.1406;CRYAB|0.2333;CDH1|0.8091;SPP1|0.1738;PAPPA2|8.8716;KRT4|0.0817;FN1|2.3988;CD63|5.7016;SLC…	52	4435	185	38520	http://www.ebi.ac.uk/QuickGO/GTerm?id=GO:0030154	[]
3	3	cell proliferation	GO:0008283	6.71e-10	2.01e-08	-26.74	-2.49	4.84136	-12.6834	KRT16|0.1995;IGFBP7|0.0824;PDZK1|11.695;LRG1|0.8017;REG1A|0.0258;DPP4|2.3335;LTF|26.7917;KRT2|13.0617;ACE|8.2414;VCAM1|9.4624;CTSH|0.4699;AQP1|0.0133;PRG4|0.3631;SERPINB3|0.0377;EGF|0.7943;TFF2|0.2655;CDH1|0.8091;CDH13|0.1706;KRT4|0.0817;FN1|2.3988;SLC9A3R1|3.8726;PRDX1|2.9107;LRP2|0.1459;IGFBP2|0.0698;TIMP1|18.197;APOE|0.5105;APOA1|10.8643;IGSF8|0.0973;MMP7|0.0817;AZGP1|1.2246;KRT6A|0.1127;PLG|0…	34	2136	185	38520	http://www.ebi.ac.uk/QuickGO/GTerm?id=GO:0008283	[]
2	2	cellular component organization or biogenesis	GO:0071840	7.66e-10	2.28e-08	-61.59	-5.92	4.84136	-12.6834	KRT16|0.1995;VWF|1.3804;IGFBP7|0.0824;SEMG1|41.6869;CTSB|0.3105;PDZK1|11.695;CD14|0.8241;HBB|1.6749;HSP90AA1|2.466;GAA|0.6026;ALDOA|2.9923;GSN|0.0718;LUM|0.2421;PDCD6IP|2.0701;MSN|3.9084;MYLK|0.7516;MDH1|2.7542;DPP4|2.3335;S100A9|0.0619;OLFM4|10.7647;VTN|0.0809;LTF|26.7917;LCP1|3.5645;COL6A1|0.3162;HBA1|1.5996;BRD1|0.0125;AHSG|0.1432;ACE|8.2414;VCAM1|9.4624;AQP1|0.0133;AHNAK|0.0643;BGN|0.1995;RDX…	83	9364	185	38520	http://www.ebi.ac.uk/QuickGO/GTerm?id=GO:0071840	[]
4	4	response to extracellular stimulus	GO:0009991	7.74e-10	2.28e-08	-16.18	-1.46	4.84136	-12.6834	PKM|4.9659;GSN|0.0718;MYLK|0.7516;MDH1|2.7542;SERPINC1|0.6026;FOLR1|0.2188;PARK7|5.9704;DSC2|0.118;AOC1|2.0701;SPP1|0.1738;SORD|13.1826;CAT|22.4905;SERPINA7|0.2188;IGFBP2|0.0698;SOD1|5.7016;IL1RN|0.2729;APOE|0.5105;ANXA5|14.0605;APOA1|10.8643;MMP7|0.0817;KRT6A|0.1127	21	835	185	38520	http://www.ebi.ac.uk/QuickGO/GTerm?id=GO:0009991	[]
2	2	biological regulation	GO:0065007	9.29e-10	2.72e-08	-102.52	-9.94	4.84136	-12.6834	KRT16|0.1995;VWF|1.3804;IGFBP7|0.0824;SEMG1|41.6869;LASP1|0.0281;CST6|0.0614;CTSB|0.3105;PDZK1|11.695;CD177|2.1878;CD14|0.8241;HBB|1.6749;HSP90AA1|2.466;MME|2.2284;CSTA|0.177;CPQ|0.3565;GAA|0.6026;ALDOA|2.9923;GSN|0.0718;LUM|0.2421;P06314|0.0809;LRG1|0.8017;PDCD6IP|2.0701;MSN|3.9084;MYLK|0.7516;MDH1|2.7542;REG1A|0.0258;SERPINC1|0.6026;DPP4|2.3335;S100A9|0.0619;OLFM4|10.7647;PGLYRP1|0.1722;VTN|0.0…	137	20133	185	38520	http://www.ebi.ac.uk/QuickGO/GTerm?id=GO:0065007	[]
4	4	cell death	GO:0008219	9.48e-10	2.75e-08	12.95	1.41	4.84136	-12.6834	CTSB|0.3105;CD14|0.8241;HBB|1.6749;PKM|4.9659;GSN|0.0718;PDCD6IP|2.0701;S100A9|0.0619;OLFM4|10.7647;LTF|26.7917;SERPINB13|0.3373;HBA1|1.5996;CTSC|0.3076;HSPB1|0.3837;CTSH|0.4699;AQP1|0.0133;LCN2|0.2208;PARK7|5.9704;YWHAZ|2.704;HP|34.3558;CRYAB|0.2333;CDH1|0.8091;GAPDH|2.2699;PRDX2|57.0164;SHISA5|0.2704;SLC9A3R1|3.8726;CAT|22.4905;LAMP1|2.6062;TIMP1|18.197;SOD1|5.7016;IL1RN|0.2729;APOE|0.5105;ANXA…	37	2519	185	38520	http://www.ebi.ac.uk/QuickGO/GTerm?id=GO:0008219	[]
4	4	regulation of cell adhesion	GO:0030155	9.64e-10	2.78e-08	-6.71	-0.52	4.84136	-12.6834	GSN|0.0718;DPP4|2.3335;OLFM4|10.7647;VTN|0.0809;VCAM1|9.4624;NID1|0.5058;SPINK5|0.1406;CDH1|0.8091;SPP1|0.1738;CDH13|0.1706;FN1|2.3988;SERPINI1|12.1339;HLA-DRA|1.406;IGFBP2|0.0698;SOD1|5.7016;IL1RN|0.2729;APOA1|10.8643;PLG|0.3908;SCGB1A1|8.5507	19	681	185	38520	http://www.ebi.ac.uk/QuickGO/GTerm?id=GO:0030155	[]
4	4	small molecule metabolic process	GO:0044281	9.73e-10	2.78e-08	29.16	3	4.84136	-12.6834	HBB|1.6749;HSP90AA1|2.466;MME|2.2284;PKM|4.9659;GAA|0.6026;ALDOA|2.9923;LUM|0.2421;MDH1|2.7542;MGAM|3.5318;CNDP2|2.6303;HBA1|1.5996;AQP1|0.0133;GGH|0.492;PGK1|2.0324;BGN|0.1995;CKB|15.1356;FOLR1|0.2188;FABP5|0.0296;PARK7|5.9704;HSPA8|2.3988;CUBN|0.1067;CTSA|0.4571;TPI1|2.0893;GAPDH|2.2699;BHMT|0.8166;GLB1|0.52;ACPP|64.2688;GNS|0.4246;LRP2|0.1459;SORD|13.1826;CA2|8.7096;CAT|22.4905;CA1|52.9663;SOD…	46	3670	185	38520	http://www.ebi.ac.uk/QuickGO/GTerm?id=GO:0044281	[]
3	3	death	GO:0016265	9.9e-10	2.81e-08	12.95	1.41	4.84136	-12.6834	CTSB|0.3105;CD14|0.8241;HBB|1.6749;PKM|4.9659;GSN|0.0718;PDCD6IP|2.0701;S100A9|0.0619;OLFM4|10.7647;LTF|26.7917;SERPINB13|0.3373;HBA1|1.5996;CTSC|0.3076;HSPB1|0.3837;CTSH|0.4699;AQP1|0.0133;LCN2|0.2208;PARK7|5.9704;YWHAZ|2.704;HP|34.3558;CRYAB|0.2333;CDH1|0.8091;GAPDH|2.2699;PRDX2|57.0164;SHISA5|0.2704;SLC9A3R1|3.8726;CAT|22.4905;LAMP1|2.6062;TIMP1|18.197;SOD1|5.7016;IL1RN|0.2729;APOE|0.5105;ANXA…	37	2523	185	38520	http://www.ebi.ac.uk/QuickGO/GTerm?id=GO:0016265	[]
7	7	glycosaminoglycan catabolic process	GO:0006027	1.1e-09	3.1e-08	-3.54	-0.21	4.84136	-12.6834	LUM|0.2421;PGLYRP1|0.1722;PGLYRP2|0.3945;BGN|0.1995;GLB1|0.52;GNS|0.4246;HEXB|1.3804;NAGLU|0.5546	8	66	185	38520	http://www.ebi.ac.uk/QuickGO/GTerm?id=GO:0006027	[]
7	5,7	defense response to bacterium	GO:0042742	1.19e-09	3.31e-08	-2.87	-0.15	4.84136	-12.6834	SEMG1|41.6869;S100A9|0.0619;PGLYRP1|0.1722;LTF|26.7917;PGLYRP2|0.3945;LYZ|0.5346;KLK3|65.4636;HP|34.3558;DCD|4.9204;S100A8|0.1644;MMP7|0.0817;IGHA2|1.977	12	226	185	38520	http://www.ebi.ac.uk/QuickGO/GTerm?id=GO:0042742	[]
6	6	aminoglycan catabolic process	GO:0006026	1.46e-09	4.05e-08	-3.94	-0.25	4.84136	-12.6834	LUM|0.2421;PGLYRP1|0.1722;PGLYRP2|0.3945;BGN|0.1995;GLB1|0.52;GNS|0.4246;CTBS|0.3908;HEXB|1.3804;NAGLU|0.5546	9	100	185	38520	http://www.ebi.ac.uk/QuickGO/GTerm?id=GO:0006026	[]
3	3	single-organism localization	GO:1902578	2.89e-09	7.95e-08	-51.71	-4.95	4.84136	-12.6834	VWF|1.3804;SEMG1|41.6869;LASP1|0.0281;PDZK1|11.695;CD14|0.8241;HBB|1.6749;HSP90AA1|2.466;GAA|0.6026;ALDOA|2.9923;GSN|0.0718;P06314|0.0809;PDCD6IP|2.0701;MSN|3.9084;MYLK|0.7516;S100A9|0.0619;OLFM4|10.7647;LTF|26.7917;HBA1|1.5996;AHSG|0.1432;ACE|8.2414;AQP1|0.0133;HBD|25.5859;AHNAK|0.0643;RDX|1.5704;SERPINA5|0.0698;FOLR1|0.2188;LCN2|0.2208;FABP5|0.0296;PARK7|5.9704;YWHAZ|2.704;HSPA8|2.3988;CUBN|0.1…	68	7088	185	38520	http://www.ebi.ac.uk/QuickGO/GTerm?id=GO:1902578	[]
5	4,5	complement activation	GO:0006956	2.98e-09	8.16e-08	-10	-0.85	4.84136	-12.6834	P06314|0.0809;VTN|0.0809;MASP2|0.4446;P01594|0.0643;IGHG3|0.2992;C3|1.3804;A2M|22.9087;C4A|0.3467;P01614|0.7727;P01616|0.0145;P01617|0.0146	11	194	185	38520	http://www.ebi.ac.uk/QuickGO/GTerm?id=GO:0006956	[]
7	6,7	retina homeostasis	GO:0001895	3.12e-09	8.45e-08	4.24	0.55	4.84136	-12.6834	LTF|26.7917;HSPB1|0.3837;LYZ|0.5346;PRDX1|2.9107;SOD1|5.7016;IGHG3|0.2992;AZGP1|1.2246;IGHA2|1.977	8	75	185	38520	http://www.ebi.ac.uk/QuickGO/GTerm?id=GO:0001895	[]
5	4,5	positive regulation of cell communication	GO:0010647	3.22e-09	8.67e-08	-24	-2.22	4.84136	-12.6834	LASP1|0.0281;CD14|0.8241;GSN|0.0718;LRG1|0.8017;MYLK|0.7516;MDH1|2.7542;S100A9|0.0619;VTN|0.0809;LTF|26.7917;CTSC|0.3076;CTSH|0.4699;PARK7|5.9704;YWHAZ|2.704;EGF|0.7943;TFF2|0.2655;CDH13|0.1706;ACPP|64.2688;CD63|5.7016;SHISA5|0.2704;SLC9A3R1|3.8726;CA2|8.7096;CAT|22.4905;SOD1|5.7016;IL1RN|0.2729;ANXA5|14.0605;APOA1|10.8643;S100A8|0.1644;C3|1.3804;KRT6A|0.1127;KLK6|0.0112	30	1812	185	38520	http://www.ebi.ac.uk/QuickGO/GTerm?id=GO:0010647	[]
6	5,6	phagocytosis	GO:0006909	3.48e-09	9.3e-08	-11.3	-0.98	4.84136	-12.6834	CD14|0.8241;HSP90AA1|2.466;GSN|0.0718;P06314|0.0809;OLFM4|10.7647;AHSG|0.1432;LMAN2|0.2466;P01594|0.0643;IGHG3|0.2992;C3|1.3804;C4A|0.3467;P01614|0.7727;P01616|0.0145;P01617|0.0146	14	367	185	38520	http://www.ebi.ac.uk/QuickGO/GTerm?id=GO:0006909	[]
5	5	response to copper ion	GO:0046688	3.9e-09	1.04e-07	5.79	0.7	4.84136	-12.6834	AQP1|0.0133;PARK7|5.9704;AOC1|2.0701;SORD|13.1826;SOD1|5.7016;SOD3|8.7902	6	28	185	38520	http://www.ebi.ac.uk/QuickGO/GTerm?id=GO:0046688	[]
5	5	carbohydrate catabolic process	GO:0016052	4.06e-09	1.07e-07	5.1	0.64	4.84136	-12.6834	PKM|4.9659;GAA|0.6026;ALDOA|2.9923;MGAM|3.5318;PGK1|2.0324;TPI1|2.0893;GAPDH|2.2699;GLB1|0.52;SORD|13.1826;CTBS|0.3908;HEXB|1.3804;NEU1|0.597	12	252	185	38520	http://www.ebi.ac.uk/QuickGO/GTerm?id=GO:0016052	[]
5	4,5	single-organism transport	GO:0044765	4.33e-09	1.13e-07	-50.16	-4.8	4.84136	-12.6834	VWF|1.3804;SEMG1|41.6869;LASP1|0.0281;PDZK1|11.695;CD14|0.8241;HBB|1.6749;HSP90AA1|2.466;ALDOA|2.9923;GSN|0.0718;P06314|0.0809;PDCD6IP|2.0701;MSN|3.9084;MYLK|0.7516;S100A9|0.0619;OLFM4|10.7647;LTF|26.7917;HBA1|1.5996;AHSG|0.1432;ACE|8.2414;AQP1|0.0133;HBD|25.5859;AHNAK|0.0643;RDX|1.5704;SERPINA5|0.0698;FOLR1|0.2188;LCN2|0.2208;FABP5|0.0296;PARK7|5.9704;YWHAZ|2.704;HSPA8|2.3988;CUBN|0.1067;LMAN2|0…	66	6834	185	38520	http://www.ebi.ac.uk/QuickGO/GTerm?id=GO:0044765	[]
4	4	response to hormone	GO:0009725	5.17e-09	1.34e-07	-18.66	-1.7	4.84136	-12.6834	CTSB|0.3105;PKM|4.9659;MSN|3.9084;AHSG|0.1432;CTSH|0.4699;AQP1|0.0133;GGH|0.492;CRYAB|0.2333;SPP1|0.1738;SORD|13.1826;FBN1|0.1585;PTPRN|0.7047;CA2|8.7096;CAT|22.4905;SERPINA7|0.2188;IGFBP2|0.0698;TIMP1|18.197;IL1RN|0.2729;APOA1|10.8643;C3|1.3804;PRCP|0.0685;SCGB1A1|8.5507;IDH1|6.9183	23	1117	185	38520	http://www.ebi.ac.uk/QuickGO/GTerm?id=GO:0009725	[]
5	4,5	positive regulation of cellular component organization	GO:0051130	5.6e-09	1.45e-07	-8.08	-0.66	4.84136	-12.6834	PDZK1|11.695;CD14|0.8241;GSN|0.0718;PDCD6IP|2.0701;MYLK|0.7516;MDH1|2.7542;OLFM4|10.7647;VTN|0.0809;LCP1|3.5645;AHSG|0.1432;AQP1|0.0133;SERPINB3|0.0377;PARK7|5.9704;YWHAZ|2.704;LMAN2|0.2466;EGF|0.7943;FN1|2.3988;CD63|5.7016;APOE|0.5105;ANXA5|14.0605;APOA1|10.8643;C3|1.3804;KRT6A|0.1127;C4A|0.3467;NEU1|0.597	25	1320	185	38520	http://www.ebi.ac.uk/QuickGO/GTerm?id=GO:0051130	[]
5	5	organonitrogen compound catabolic process	GO:1901565	5.82e-09	1.48e-07	-7.92	-0.64	4.84136	-12.6834	CPQ|0.3565;LUM|0.2421;PGLYRP1|0.1722;PGLYRP2|0.3945;ACE|8.2414;CTSH|0.4699;BGN|0.1995;GLB1|0.52;GNS|0.4246;CAT|22.4905;CTBS|0.3908;HEXB|1.3804;GGT1|5.0582;NEU1|0.597;NAGLU|0.5546	15	450	185	38520	http://www.ebi.ac.uk/QuickGO/GTerm?id=GO:1901565	[]
5	4,5	regulation of cell communication	GO:0010646	5.83e-09	1.48e-07	-38.21	-3.62	4.84136	-12.6834	LASP1|0.0281;CD14|0.8241;GSN|0.0718;LRG1|0.8017;MYLK|0.7516;MDH1|2.7542;S100A9|0.0619;OLFM4|10.7647;VTN|0.0809;LTF|26.7917;AHSG|0.1432;CTSC|0.3076;HSPB1|0.3837;CTSH|0.4699;SERPINB3|0.0377;FOLR1|0.2188;PARK7|5.9704;YWHAZ|2.704;EGF|0.7943;TFF2|0.2655;CDH13|0.1706;FN1|2.3988;ACPP|64.2688;CD63|5.7016;SHISA5|0.2704;SLC9A3R1|3.8726;PRDX1|2.9107;FBN1|0.1585;CA2|8.7096;VASN|0.0982;CAT|22.4905;IGFBP2|0.06…	45	3746	185	38520	http://www.ebi.ac.uk/QuickGO/GTerm?id=GO:0010646	[]
4	4	transport	GO:0006810	6.07e-09	1.53e-07	-57.07	-5.47	4.84136	-12.6834	VWF|1.3804;SEMG1|41.6869;LASP1|0.0281;PDZK1|11.695;CD14|0.8241;HBB|1.6749;HSP90AA1|2.466;ALDOA|2.9923;GSN|0.0718;P06314|0.0809;PDCD6IP|2.0701;MSN|3.9084;MYLK|0.7516;S100A9|0.0619;OLFM4|10.7647;VTN|0.0809;LTF|26.7917;LCP1|3.5645;HBA1|1.5996;AHSG|0.1432;ACE|8.2414;AQP1|0.0133;HBD|25.5859;PRG4|0.3631;AHNAK|0.0643;RDX|1.5704;SERPINA5|0.0698;FOLR1|0.2188;LCN2|0.2208;FABP5|0.0296;PARK7|5.9704;YWHAZ|2.7…	76	8544	185	38520	http://www.ebi.ac.uk/QuickGO/GTerm?id=GO:0006810	[]
6	6	epidermis development	GO:0008544	6.31e-09	1.58e-07	-10.84	-0.93	4.84136	-12.6834	KRT16|0.1995;CST6|0.0614;CSTA|0.177;KRT2|13.0617;FABP5|0.0296;KRT10|5.3951;KRT5|0.3802;SPINK5|0.1406;SLC9A3R1|3.8726;SOD1|5.7016;SPRR3|0.5495;SPRR1A|0.0555;SPRR2A|0.2148	13	321	185	38520	http://www.ebi.ac.uk/QuickGO/GTerm?id=GO:0008544	[]
5	5	response to lipid	GO:0033993	8.59e-09	2.14e-07	-16.89	-1.53	4.84136	-12.6834	CD14|0.8241;MSN|3.9084;S100A9|0.0619;LTF|26.7917;CTSH|0.4699;AQP1|0.0133;KRT13|0.0373;CRYAB|0.2333;SPP1|0.1738;PTPRN|0.7047;CA2|8.7096;CAT|22.4905;SERPINA7|0.2188;IGFBP2|0.0698;IL1RN|0.2729;APOA1|10.8643;S100A8|0.1644;C3|1.3804;SCGB1A1|8.5507;IDH1|6.9183	20	867	185	38520	http://www.ebi.ac.uk/QuickGO/GTerm?id=GO:0033993	[]
4	4	cellular developmental process	GO:0048869	1.02e-08	2.54e-07	-38.85	-3.68	4.84136	-12.6834	KRT16|0.1995;CTSB|0.3105;HSP90AA1|2.466;CSTA|0.177;ALDOA|2.9923;GSN|0.0718;LRG1|0.8017;MSN|3.9084;OLFM4|10.7647;PGLYRP1|0.1722;VTN|0.0809;LTF|26.7917;KRT2|13.0617;COL6A1|0.3162;PGLYRP2|0.3945;ACE|8.2414;VCAM1|9.4624;PGK1|2.0324;RDX|1.5704;SERPINB3|0.0377;FOLR1|0.2188;KRT10|5.3951;HSPA8|2.3988;COL15A1|0.1556;SPINK5|0.1406;CRYAB|0.2333;CDH1|0.8091;SPP1|0.1738;PAPPA2|8.8716;KRT4|0.0817;FN1|2.3988;CD…	53	4963	185	38520	http://www.ebi.ac.uk/QuickGO/GTerm?id=GO:0048869	[]
3	3	positive regulation of immune system process	GO:0002684	1.04e-08	2.56e-07	-17.58	-1.59	4.84136	-12.6834	CTSB|0.3105;CD14|0.8241;HSP90AA1|2.466;P06314|0.0809;DPP4|2.3335;PGLYRP1|0.1722;VTN|0.0809;LTF|26.7917;PGLYRP2|0.3945;VCAM1|9.4624;MASP2|0.4446;HLA-DRA|1.406;CA2|8.7096;IGFBP2|0.0698;LAMP1|2.6062;P01594|0.0643;IGHG3|0.2992;C3|1.3804;A2M|22.9087;C4A|0.3467;P01614|0.7727;P01616|0.0145;P01617|0.0146	23	1160	185	38520	http://www.ebi.ac.uk/QuickGO/GTerm?id=GO:0002684	[]
8	4,8	removal of superoxide radicals	GO:0019430	1.12e-08	2.75e-07	5.2	0.65	4.84136	-12.6834	PARK7|5.9704;PRDX2|57.0164;PRDX1|2.9107;SOD1|5.7016;APOA4|3.2211;SOD3|8.7902	6	33	185	38520	http://www.ebi.ac.uk/QuickGO/GTerm?id=GO:0019430	[]
3	3	establishment of localization	GO:0051234	1.22e-08	2.97e-07	-57.07	-5.47	4.84136	-12.6834	VWF|1.3804;SEMG1|41.6869;LASP1|0.0281;PDZK1|11.695;CD14|0.8241;HBB|1.6749;HSP90AA1|2.466;ALDOA|2.9923;GSN|0.0718;P06314|0.0809;PDCD6IP|2.0701;MSN|3.9084;MYLK|0.7516;S100A9|0.0619;OLFM4|10.7647;VTN|0.0809;LTF|26.7917;LCP1|3.5645;HBA1|1.5996;AHSG|0.1432;ACE|8.2414;AQP1|0.0133;HBD|25.5859;PRG4|0.3631;AHNAK|0.0643;RDX|1.5704;SERPINA5|0.0698;FOLR1|0.2188;LCN2|0.2208;FABP5|0.0296;PARK7|5.9704;YWHAZ|2.7…	76	8676	185	38520	http://www.ebi.ac.uk/QuickGO/GTerm?id=GO:0051234	[]
6	5,6	secretion	GO:0046903	1.37e-08	3.3e-07	18.69	1.97	4.84136	-12.6834	VWF|1.3804;CD14|0.8241;ALDOA|2.9923;PDCD6IP|2.0701;S100A9|0.0619;ACE|8.2414;AQP1|0.0133;HSPA8|2.3988;EGF|0.7943;TFF2|0.2655;FN1|2.3988;SERPINA1|0.6546;CD63|5.7016;SLC9A3R1|3.8726;PTPRN|0.7047;CA2|8.7096;LAMP1|2.6062;SPINK1|0.0113;TIMP1|18.197;SOD1|5.7016;IL1RN|0.2729;APOA1|10.8643;S100A8|0.1644;MMP7|0.0817;A2M|22.9087;PLG|0.3908	26	1487	185	38520	http://www.ebi.ac.uk/QuickGO/GTerm?id=GO:0046903	[]
4	4	homeostatic process	GO:0042592	1.67e-08	4e-07	-20.49	-1.88	4.84136	-12.6834	KRT16|0.1995;GAA|0.6026;ALDOA|2.9923;S100A9|0.0619;LTF|26.7917;HSPB1|0.3837;CTSH|0.4699;AQP1|0.0133;LYZ|0.5346;CKB|15.1356;LCN2|0.2208;SERPINA3|0.3436;CUBN|0.1067;SPP1|0.1738;SLC9A3R1|3.8726;PRDX1|2.9107;CA2|8.7096;SOD1|5.7016;IL1RN|0.2729;APOE|0.5105;SH3BGRL3|0.0409;APOA1|10.8643;S100A8|0.1644;IGHG3|0.2992;AZGP1|1.2246;PRCP|0.0685;HEXB|1.3804;APOA4|3.2211;IGHA2|1.977	29	1834	185	38520	http://www.ebi.ac.uk/QuickGO/GTerm?id=GO:0042592	[]
6	6	protein processing	GO:0016485	1.75e-08	4.15e-07	-12.36	-1.08	4.84136	-12.6834	CD14|0.8241;MME|2.2284;GSN|0.0718;S100A9|0.0619;VTN|0.0809;CTSC|0.3076;ACE|8.2414;CTSH|0.4699;S100A8|0.1644;C3|1.3804;A2M|22.9087;C4A|0.3467;GGT1|5.0582;CPE|21.0863;KLK6|0.0112	15	489	185	38520	http://www.ebi.ac.uk/QuickGO/GTerm?id=GO:0016485	[]
5	4,5	defense response to other organism	GO:0098542	1.76e-08	4.15e-07	-3.38	-0.2	4.84136	-12.6834	SEMG1|41.6869;MYLK|0.7516;MDH1|2.7542;S100A9|0.0619;PGLYRP1|0.1722;LTF|26.7917;PGLYRP2|0.3945;LYZ|0.5346;KLK3|65.4636;HP|34.3558;DCD|4.9204;ANXA5|14.0605;S100A8|0.1644;MMP7|0.0817;KRT6A|0.1127;IGHA2|1.977	16	565	185	38520	http://www.ebi.ac.uk/QuickGO/GTerm?id=GO:0098542	[]
6	4,5,6	regulation of signal transduction	GO:0009966	1.76e-08	4.15e-07	-34.61	-3.27	4.84136	-12.6834	LASP1|0.0281;CD14|0.8241;GSN|0.0718;LRG1|0.8017;S100A9|0.0619;OLFM4|10.7647;VTN|0.0809;LTF|26.7917;AHSG|0.1432;CTSC|0.3076;HSPB1|0.3837;CTSH|0.4699;SERPINB3|0.0377;FOLR1|0.2188;PARK7|5.9704;YWHAZ|2.704;EGF|0.7943;TFF2|0.2655;CDH13|0.1706;FN1|2.3988;ACPP|64.2688;CD63|5.7016;SHISA5|0.2704;SLC9A3R1|3.8726;PRDX1|2.9107;FBN1|0.1585;VASN|0.0982;CAT|22.4905;IGFBP2|0.0698;SPINK1|0.0113;TIMP1|18.197;SOD1|…	40	3203	185	38520	http://www.ebi.ac.uk/QuickGO/GTerm?id=GO:0009966	[]
4	4	cell-substrate adhesion	GO:0031589	1.94e-08	4.51e-07	-4.32	-0.29	4.84136	-12.6834	VWF|1.3804;OLFM4|10.7647;VTN|0.0809;BCAM|0.4875;VCAM1|9.4624;NID1|0.5058;LYPD3|0.182;SPP1|0.1738;CDH13|0.1706;FN1|2.3988;CD63|5.7016;APOA1|10.8643;PLG|0.3908	13	353	185	38520	http://www.ebi.ac.uk/QuickGO/GTerm?id=GO:0031589	[]
6	6	cellular response to oxygen radical	GO:0071450	1.95e-08	4.51e-07	5.2	0.65	4.84136	-12.6834	PARK7|5.9704;PRDX2|57.0164;PRDX1|2.9107;SOD1|5.7016;APOA4|3.2211;SOD3|8.7902	6	36	185	38520	http://www.ebi.ac.uk/QuickGO/GTerm?id=GO:0071450	[]
7	7	cellular response to superoxide	GO:0071451	1.95e-08	4.51e-07	5.2	0.65	4.84136	-12.6834	PARK7|5.9704;PRDX2|57.0164;PRDX1|2.9107;SOD1|5.7016;APOA4|3.2211;SOD3|8.7902	6	36	185	38520	http://www.ebi.ac.uk/QuickGO/GTerm?id=GO:0071451	[]
4	4	response to external biotic stimulus	GO:0043207	2.06e-08	4.68e-07	-16.56	-1.49	4.84136	-12.6834	SEMG1|41.6869;CD14|0.8241;MYLK|0.7516;MDH1|2.7542;S100A9|0.0619;PGLYRP1|0.1722;LTF|26.7917;PGLYRP2|0.3945;HSPB1|0.3837;LYZ|0.5346;KLK3|65.4636;HP|34.3558;DCD|4.9204;IL1RN|0.2729;ANXA5|14.0605;S100A8|0.1644;MMP7|0.0817;KRT6A|0.1127;SCGB1A1|8.5507;IGHA2|1.977	20	914	185	38520	http://www.ebi.ac.uk/QuickGO/GTerm?id=GO:0043207	[]
5	3,5	response to other organism	GO:0051707	2.06e-08	4.68e-07	-16.56	-1.49	4.84136	-12.6834	SEMG1|41.6869;CD14|0.8241;MYLK|0.7516;MDH1|2.7542;S100A9|0.0619;PGLYRP1|0.1722;LTF|26.7917;PGLYRP2|0.3945;HSPB1|0.3837;LYZ|0.5346;KLK3|65.4636;HP|34.3558;DCD|4.9204;IL1RN|0.2729;ANXA5|14.0605;S100A8|0.1644;MMP7|0.0817;KRT6A|0.1127;SCGB1A1|8.5507;IGHA2|1.977	20	914	185	38520	http://www.ebi.ac.uk/QuickGO/GTerm?id=GO:0051707	[]
5	5	single-organism carbohydrate catabolic process	GO:0044724	2.18e-08	4.94e-07	4.55	0.58	4.84136	-12.6834	PKM|4.9659;GAA|0.6026;ALDOA|2.9923;PGK1|2.0324;TPI1|2.0893;GAPDH|2.2699;GLB1|0.52;SORD|13.1826;CTBS|0.3908;HEXB|1.3804;NEU1|0.597	11	235	185	38520	http://www.ebi.ac.uk/QuickGO/GTerm?id=GO:0044724	[]
3	3	activation of immune response	GO:0002253	2.24e-08	5.04e-07	-13.73	-1.21	4.84136	-12.6834	CTSB|0.3105;CD14|0.8241;HSP90AA1|2.466;P06314|0.0809;PGLYRP1|0.1722;VTN|0.0809;LTF|26.7917;PGLYRP2|0.3945;MASP2|0.4446;HLA-DRA|1.406;P01594|0.0643;IGHG3|0.2992;C3|1.3804;A2M|22.9087;C4A|0.3467;P01614|0.7727;P01616|0.0145;P01617|0.0146	18	740	185	38520	http://www.ebi.ac.uk/QuickGO/GTerm?id=GO:0002253	[]
6	4,6	response to bacterium	GO:0009617	2.54e-08	5.68e-07	-8.32	-0.68	4.84136	-12.6834	SEMG1|41.6869;CD14|0.8241;S100A9|0.0619;PGLYRP1|0.1722;LTF|26.7917;PGLYRP2|0.3945;LYZ|0.5346;KLK3|65.4636;HP|34.3558;DCD|4.9204;IL1RN|0.2729;S100A8|0.1644;MMP7|0.0817;SCGB1A1|8.5507;IGHA2|1.977	15	503	185	38520	http://www.ebi.ac.uk/QuickGO/GTerm?id=GO:0009617	[]
7	7	epidermal cell differentiation	GO:0009913	2.91e-08	6.47e-07	-7.68	-0.62	4.84136	-12.6834	KRT16|0.1995;CSTA|0.177;KRT2|13.0617;KRT10|5.3951;SPINK5|0.1406;SLC9A3R1|3.8726;SOD1|5.7016;SPRR3|0.5495;SPRR1A|0.0555;SPRR2A|0.2148	10	188	185	38520	http://www.ebi.ac.uk/QuickGO/GTerm?id=GO:0009913	[]
2	2	growth	GO:0040007	3.23e-08	7.07e-07	-15.85	-1.42	4.84136	-12.6834	IGFBP7|0.0824;PKM|4.9659;CPQ|0.3565;GSN|0.0718;S100A9|0.0619;PGLYRP1|0.1722;PGLYRP2|0.3945;CRYAB|0.2333;SPP1|0.1738;PAPPA2|8.8716;CDH13|0.1706;FN1|2.3988;IGFBP2|0.0698;SOD1|5.7016;APOE|0.5105;NOV|2.9376;S100A8|0.1644;C3|1.3804;PI16|0.182;SLC3A2|0.4742;KLK6|0.0112	21	1035	185	38520	http://www.ebi.ac.uk/QuickGO/GTerm?id=GO:0040007	[]
6	6	response to superoxide	GO:0000303	3.24e-08	7.07e-07	5.2	0.65	4.84136	-12.6834	PARK7|5.9704;PRDX2|57.0164;PRDX1|2.9107;SOD1|5.7016;APOA4|3.2211;SOD3|8.7902	6	39	185	38520	http://www.ebi.ac.uk/QuickGO/GTerm?id=GO:0000303	[]
4	4	regulation of cell proliferation	GO:0042127	3.24e-08	7.07e-07	-20.51	-1.88	4.84136	-12.6834	IGFBP7|0.0824;LRG1|0.8017;REG1A|0.0258;DPP4|2.3335;LTF|26.7917;ACE|8.2414;VCAM1|9.4624;CTSH|0.4699;AQP1|0.0133;PRG4|0.3631;SERPINB3|0.0377;EGF|0.7943;TFF2|0.2655;CDH1|0.8091;CDH13|0.1706;KRT4|0.0817;FN1|2.3988;SLC9A3R1|3.8726;IGFBP2|0.0698;TIMP1|18.197;APOE|0.5105;MMP7|0.0817;AZGP1|1.2246;KRT6A|0.1127;PLG|0.3908;SCGB1A1|8.5507;NEU1|0.597	27	1663	185	38520	http://www.ebi.ac.uk/QuickGO/GTerm?id=GO:0042127	[]
5	5	protein maturation	GO:0051604	3.38e-08	7.32e-07	-12.36	-1.08	4.84136	-12.6834	CD14|0.8241;MME|2.2284;GSN|0.0718;S100A9|0.0619;VTN|0.0809;CTSC|0.3076;ACE|8.2414;CTSH|0.4699;S100A8|0.1644;C3|1.3804;A2M|22.9087;C4A|0.3467;GGT1|5.0582;CPE|21.0863;KLK6|0.0112	15	514	185	38520	http://www.ebi.ac.uk/QuickGO/GTerm?id=GO:0051604	[]
5	5	ameboidal-type cell migration	GO:0001667	3.49e-08	7.54e-07	-10.21	-0.87	4.84136	-12.6834	KRT16|0.1995;DPP4|2.3335;KRT2|13.0617;HSPB1|0.3837;CTSH|0.4699;AQP1|0.0133;FOLR1|0.2188;CDH13|0.1706;TIMP1|18.197;APOE|0.5105;SH3BGRL3|0.0409;APOA1|10.8643	12	306	185	38520	http://www.ebi.ac.uk/QuickGO/GTerm?id=GO:0001667	[]
5	5	lymphocyte mediated immunity	GO:0002449	3.71e-08	7.95e-07	-9.27	-0.78	4.84136	-12.6834	P06314|0.0809;CTSC|0.3076;CTSH|0.4699;MASP2|0.4446;PRDX1|2.9107;LAMP1|2.6062;P01594|0.0643;IGHG3|0.2992;C3|1.3804;C4A|0.3467;P01614|0.7727;P01616|0.0145;P01617|0.0146	13	373	185	38520	http://www.ebi.ac.uk/QuickGO/GTerm?id=GO:0002449	[]
5	5	response to oxygen radical	GO:0000305	3.79e-08	8.08e-07	5.2	0.65	4.84136	-12.6834	PARK7|5.9704;PRDX2|57.0164;PRDX1|2.9107;SOD1|5.7016;APOA4|3.2211;SOD3|8.7902	6	40	185	38520	http://www.ebi.ac.uk/QuickGO/GTerm?id=GO:0000305	[]
8	5,6,7,8	positive regulation of apoptotic signaling pathway	GO:2001235	3.92e-08	8.31e-07	-6.61	-0.51	4.84136	-12.6834	CD14|0.8241;GSN|0.0718;S100A9|0.0619;CTSC|0.3076;CTSH|0.4699;PARK7|5.9704;YWHAZ|2.704;SLC9A3R1|3.8726;SOD1|5.7016;S100A8|0.1644	10	194	185	38520	http://www.ebi.ac.uk/QuickGO/GTerm?id=GO:2001235	[]
4	4	leukocyte mediated immunity	GO:0002443	4.36e-08	9.19e-07	-10.18	-0.87	4.84136	-12.6834	P06314|0.0809;CTSC|0.3076;ACE|8.2414;CTSH|0.4699;MASP2|0.4446;PRDX1|2.9107;LAMP1|2.6062;P01594|0.0643;IGHG3|0.2992;C3|1.3804;C4A|0.3467;P01614|0.7727;P01616|0.0145;P01617|0.0146	14	449	185	38520	http://www.ebi.ac.uk/QuickGO/GTerm?id=GO:0002443	[]
4	4	carbohydrate metabolic process	GO:0005975	4.42e-08	9.27e-07	-13.58	-1.2	4.84136	-12.6834	PKM|4.9659;GAA|0.6026;ALDOA|2.9923;LUM|0.2421;MDH1|2.7542;MGAM|3.5318;MAN2B2|0.3048;PGK1|2.0324;BGN|0.1995;FABP5|0.0296;EGF|0.7943;CTSA|0.4571;TPI1|2.0893;GAPDH|2.2699;GLB1|0.52;GNS|0.4246;LRP2|0.1459;SORD|13.1826;GLO1|4.4463;CTBS|0.3908;HEXB|1.3804;MAN1A1|0.1096;SLC3A2|0.4742;NEU1|0.597;NAGLU|0.5546;IDH1|6.9183	26	1577	185	38520	http://www.ebi.ac.uk/QuickGO/GTerm?id=GO:0005975	[]
3	3	response to biotic stimulus	GO:0009607	4.66e-08	9.71e-07	-16.56	-1.49	4.84136	-12.6834	SEMG1|41.6869;CD14|0.8241;MYLK|0.7516;MDH1|2.7542;S100A9|0.0619;PGLYRP1|0.1722;LTF|26.7917;PGLYRP2|0.3945;HSPB1|0.3837;LYZ|0.5346;KLK3|65.4636;HP|34.3558;DCD|4.9204;IL1RN|0.2729;ANXA5|14.0605;S100A8|0.1644;MMP7|0.0817;KRT6A|0.1127;SCGB1A1|8.5507;IGHA2|1.977	20	961	185	38520	http://www.ebi.ac.uk/QuickGO/GTerm?id=GO:0009607	[]
4	4	response to drug	GO:0042493	5e-08	1.04e-06	-0.84	0.05	4.84136	-12.6834	PDZK1|11.695;AQP1|0.0133;GGH|0.492;AOC1|2.0701;CDH1|0.8091;SORD|13.1826;CAT|22.4905;SERPINA7|0.2188;IGFBP2|0.0698;SOD1|5.7016;IL1RN|0.2729;APOA1|10.8643;MMP7|0.0817;SCGB1A1|8.5507	14	454	185	38520	http://www.ebi.ac.uk/QuickGO/GTerm?id=GO:0042493	[]
10	9,10	NADH metabolic process	GO:0006734	5.14e-08	1.06e-06	2.6	0.39	4.84136	-12.6834	PKM|4.9659;ALDOA|2.9923;MDH1|2.7542;PGK1|2.0324;TPI1|2.0893;GAPDH|2.2699	6	42	185	38520	http://www.ebi.ac.uk/QuickGO/GTerm?id=GO:0006734	[]
5	5	response to hydrogen peroxide	GO:0042542	5.28e-08	1.08e-06	7.36	0.86	4.84136	-12.6834	HBB|1.6749;HBA1|1.5996;AQP1|0.0133;PARK7|5.9704;HP|34.3558;CRYAB|0.2333;CAT|22.4905;SOD1|5.7016	8	107	185	38520	http://www.ebi.ac.uk/QuickGO/GTerm?id=GO:0042542	[]
4	4	positive regulation of immune response	GO:0050778	5.34e-08	1.09e-06	-14.14	-1.25	4.84136	-12.6834	CTSB|0.3105;CD14|0.8241;HSP90AA1|2.466;P06314|0.0809;PGLYRP1|0.1722;VTN|0.0809;LTF|26.7917;PGLYRP2|0.3945;MASP2|0.4446;HLA-DRA|1.406;LAMP1|2.6062;P01594|0.0643;IGHG3|0.2992;C3|1.3804;A2M|22.9087;C4A|0.3467;P01614|0.7727;P01616|0.0145;P01617|0.0146	19	875	185	38520	http://www.ebi.ac.uk/QuickGO/GTerm?id=GO:0050778	[]
3	3	negative regulation of multicellular organismal process	GO:0051241	7.54e-08	1.53e-06	-16.94	-1.53	4.84136	-12.6834	PGLYRP1|0.1722;VTN|0.0809;LTF|26.7917;PGLYRP2|0.3945;AHSG|0.1432;PRG4|0.3631;KLK3|65.4636;SPINK5|0.1406;TFF2|0.2655;SPP1|0.1738;FN1|2.3988;VASN|0.0982;TIMP1|18.197;SOD1|5.7016;APOE|0.5105;ANXA5|14.0605;APOA1|10.8643;PLG|0.3908;SCGB1A1|8.5507;PI16|0.182	20	990	185	38520	http://www.ebi.ac.uk/QuickGO/GTerm?id=GO:0051241	[]
3	3	negative regulation of metabolic process	GO:0009892	7.87e-08	1.59e-06	-31.85	-3	4.84136	-12.6834	CST6|0.0614;CSTA|0.177;SERPINC1|0.6026;VTN|0.0809;LTF|26.7917;SERPINB13|0.3373;AHSG|0.1432;HSPB1|0.3837;AQP1|0.0133;PRG4|0.3631;SERPINB3|0.0377;SERPINA5|0.0698;PARK7|5.9704;HP|34.3558;A2ML1|0.2168;HSPA8|2.3988;SERPINA6|0.3873;SERPINA3|0.3436;SPINK5|0.1406;CRYAB|0.2333;GAPDH|2.2699;SERPINA1|0.6546;SLC9A3R1|3.8726;SERPINI1|12.1339;CAT|22.4905;SERPINA7|0.2188;SPINK1|0.0113;TIMP1|18.197;SOD1|5.7016;A…	38	3113	185	38520	http://www.ebi.ac.uk/QuickGO/GTerm?id=GO:0009892	[]
3	3	negative regulation of response to stimulus	GO:0048585	8.54e-08	1.71e-06	-21.37	-1.97	4.84136	-12.6834	SERPINC1|0.6026;OLFM4|10.7647;PGLYRP1|0.1722;VTN|0.0809;LTF|26.7917;PGLYRP2|0.3945;AHSG|0.1432;HSPB1|0.3837;SERPINB3|0.0377;PARK7|5.9704;HP|34.3558;EGF|0.7943;SPINK5|0.1406;TFF2|0.2655;SPP1|0.1738;SLC9A3R1|3.8726;FBN1|0.1585;VASN|0.0982;SPINK1|0.0113;IL1RN|0.2729;APOE|0.5105;ANXA5|14.0605;APOA1|10.8643;A2M|22.9087;PLG|0.3908	25	1519	185	38520	http://www.ebi.ac.uk/QuickGO/GTerm?id=GO:0048585	[]
4	4	blood vessel morphogenesis	GO:0048514	9.14e-08	1.82e-06	-9.82	-0.83	4.84136	-12.6834	LRG1|0.8017;MYLK|0.7516;HSPB1|0.3837;CTSH|0.4699;AQP1|0.0133;KLK3|65.4636;FOLR1|0.2188;COL15A1|0.1556;EGF|0.7943;SPINK5|0.1406;CDH13|0.1706;FN1|2.3988;APOE|0.5105;C3|1.3804;PRCP|0.0685	15	555	185	38520	http://www.ebi.ac.uk/QuickGO/GTerm?id=GO:0048514	[]
4	4	negative regulation of response to wounding	GO:1903035	9.53e-08	1.88e-06	-6.3	-0.48	4.84136	-12.6834	SERPINC1|0.6026;PGLYRP1|0.1722;VTN|0.0809;TFF2|0.2655;SPP1|0.1738;APOE|0.5105;ANXA5|14.0605;APOA1|10.8643;PLG|0.3908	9	161	185	38520	http://www.ebi.ac.uk/QuickGO/GTerm?id=GO:1903035	[]
9	5,6,9	complement activation, classical pathway	GO:0006958	9.53e-08	1.88e-06	-7.55	-0.61	4.84136	-12.6834	P06314|0.0809;MASP2|0.4446;P01594|0.0643;IGHG3|0.2992;C3|1.3804;C4A|0.3467;P01614|0.7727;P01616|0.0145;P01617|0.0146	9	161	185	38520	http://www.ebi.ac.uk/QuickGO/GTerm?id=GO:0006958	[]
7	4,5,6,7	positive regulation of signal transduction	GO:0009967	1.05e-07	2.07e-06	-20.4	-1.87	4.84136	-12.6834	LASP1|0.0281;CD14|0.8241;GSN|0.0718;LRG1|0.8017;S100A9|0.0619;VTN|0.0809;LTF|26.7917;CTSC|0.3076;CTSH|0.4699;PARK7|5.9704;YWHAZ|2.704;EGF|0.7943;TFF2|0.2655;CDH13|0.1706;ACPP|64.2688;CD63|5.7016;SHISA5|0.2704;SLC9A3R1|3.8726;CAT|22.4905;SOD1|5.7016;IL1RN|0.2729;APOA1|10.8643;S100A8|0.1644;C3|1.3804;KLK6|0.0112	25	1536	185	38520	http://www.ebi.ac.uk/QuickGO/GTerm?id=GO:0009967	[]
4	4	aging	GO:0007568	1.08e-07	2.11e-06	-9.61	-0.81	4.84136	-12.6834	KRT16|0.1995;MME|2.2284;GSN|0.0718;CTSC|0.3076;CRYAB|0.2333;CAT|22.4905;SERPINA7|0.2188;IGFBP2|0.0698;TIMP1|18.197;SOD1|5.7016;MMP7|0.0817	11	275	185	38520	http://www.ebi.ac.uk/QuickGO/GTerm?id=GO:0007568	[]
5	5	response to steroid hormone	GO:0048545	1.12e-07	2.18e-06	-0.03	0.13	4.84136	-12.6834	MSN|3.9084;AQP1|0.0133;CRYAB|0.2333;SPP1|0.1738;PTPRN|0.7047;CA2|8.7096;CAT|22.4905;SERPINA7|0.2188;IGFBP2|0.0698;IL1RN|0.2729;APOA1|10.8643;C3|1.3804;SCGB1A1|8.5507;IDH1|6.9183	14	485	185	38520	http://www.ebi.ac.uk/QuickGO/GTerm?id=GO:0048545	[]
6	6	epithelial cell migration	GO:0010631	1.17e-07	2.26e-06	-8.29	-0.68	4.84136	-12.6834	KRT16|0.1995;DPP4|2.3335;KRT2|13.0617;HSPB1|0.3837;CTSH|0.4699;AQP1|0.0133;CDH13|0.1706;APOE|0.5105;SH3BGRL3|0.0409;APOA1|10.8643	10	218	185	38520	http://www.ebi.ac.uk/QuickGO/GTerm?id=GO:0010631	[]
5	5	epithelium migration	GO:0090132	1.33e-07	2.54e-06	-8.29	-0.68	4.84136	-12.6834	KRT16|0.1995;DPP4|2.3335;KRT2|13.0617;HSPB1|0.3837;CTSH|0.4699;AQP1|0.0133;CDH13|0.1706;APOE|0.5105;SH3BGRL3|0.0409;APOA1|10.8643	10	221	185	38520	http://www.ebi.ac.uk/QuickGO/GTerm?id=GO:0090132	[]
5	5	programmed cell death	GO:0012501	1.33e-07	2.54e-06	-23.96	-2.22	4.84136	-12.6834	CTSB|0.3105;CD14|0.8241;PKM|4.9659;GSN|0.0718;PDCD6IP|2.0701;S100A9|0.0619;OLFM4|10.7647;LTF|26.7917;SERPINB13|0.3373;CTSC|0.3076;HSPB1|0.3837;CTSH|0.4699;AQP1|0.0133;LCN2|0.2208;PARK7|5.9704;YWHAZ|2.704;CRYAB|0.2333;CDH1|0.8091;GAPDH|2.2699;PRDX2|57.0164;SHISA5|0.2704;SLC9A3R1|3.8726;CAT|22.4905;LAMP1|2.6062;TIMP1|18.197;SOD1|5.7016;IL1RN|0.2729;APOE|0.5105;ANXA5|14.0605;DNASE1|0.138;S100A8|0.16…	32	2391	185	38520	http://www.ebi.ac.uk/QuickGO/GTerm?id=GO:0012501	[]
4	4	regulation of anatomical structure morphogenesis	GO:0022603	1.38e-07	2.61e-06	-14.96	-1.34	4.84136	-12.6834	ALDOA|2.9923;GSN|0.0718;LRG1|0.8017;MSN|3.9084;OLFM4|10.7647;HSPB1|0.3837;CTSH|0.4699;AQP1|0.0133;SERPINB3|0.0377;KLK3|65.4636;SPINK5|0.1406;SPP1|0.1738;FN1|2.3988;SLC9A3R1|3.8726;VASN|0.0982;IL1RN|0.2729;APOE|0.5105;APOA1|10.8643;C3|1.3804;HEXB|1.3804	20	1028	185	38520	http://www.ebi.ac.uk/QuickGO/GTerm?id=GO:0022603	[]
6	6	response to ethanol	GO:0045471	1.38e-07	2.61e-06	-6.14	-0.47	4.84136	-12.6834	CTSB|0.3105;CD14|0.8241;GSN|0.0718;S100A9|0.0619;GGH|0.492;CAT|22.4905;SOD1|5.7016;S100A8|0.1644	8	121	185	38520	http://www.ebi.ac.uk/QuickGO/GTerm?id=GO:0045471	[]
5	5	sulfur compound catabolic process	GO:0044273	1.51e-07	2.84e-06	-2.82	-0.14	4.84136	-12.6834	LUM|0.2421;BGN|0.1995;GLB1|0.52;GNS|0.4246;HEXB|1.3804;GGT1|5.0582	6	50	185	38520	http://www.ebi.ac.uk/QuickGO/GTerm?id=GO:0044273	[]
3	3	positive regulation of signaling	GO:0023056	1.67e-07	3.12e-06	-21.34	-1.96	4.84136	-12.6834	LASP1|0.0281;CD14|0.8241;GSN|0.0718;LRG1|0.8017;S100A9|0.0619;VTN|0.0809;LTF|26.7917;CTSC|0.3076;CTSH|0.4699;PARK7|5.9704;YWHAZ|2.704;EGF|0.7943;TFF2|0.2655;CDH13|0.1706;ACPP|64.2688;CD63|5.7016;SHISA5|0.2704;SLC9A3R1|3.8726;CA2|8.7096;CAT|22.4905;SOD1|5.7016;IL1RN|0.2729;APOA1|10.8643;S100A8|0.1644;C3|1.3804;KLK6|0.0112	26	1688	185	38520	http://www.ebi.ac.uk/QuickGO/GTerm?id=GO:0023056	[]
4	4	tissue migration	GO:0090130	1.7e-07	3.17e-06	-8.29	-0.68	4.84136	-12.6834	KRT16|0.1995;DPP4|2.3335;KRT2|13.0617;HSPB1|0.3837;CTSH|0.4699;AQP1|0.0133;CDH13|0.1706;APOE|0.5105;SH3BGRL3|0.0409;APOA1|10.8643	10	227	185	38520	http://www.ebi.ac.uk/QuickGO/GTerm?id=GO:0090130	[]
3	3	regulation of signaling	GO:0023051	1.74e-07	3.21e-06	-35.55	-3.36	4.84136	-12.6834	LASP1|0.0281;CD14|0.8241;GSN|0.0718;LRG1|0.8017;S100A9|0.0619;OLFM4|10.7647;VTN|0.0809;LTF|26.7917;AHSG|0.1432;CTSC|0.3076;HSPB1|0.3837;CTSH|0.4699;SERPINB3|0.0377;FOLR1|0.2188;PARK7|5.9704;YWHAZ|2.704;EGF|0.7943;TFF2|0.2655;CDH13|0.1706;FN1|2.3988;ACPP|64.2688;CD63|5.7016;SHISA5|0.2704;SLC9A3R1|3.8726;PRDX1|2.9107;FBN1|0.1585;CA2|8.7096;VASN|0.0982;CAT|22.4905;IGFBP2|0.0698;SPINK1|0.0113;TIMP1|1…	41	3627	185	38520	http://www.ebi.ac.uk/QuickGO/GTerm?id=GO:0023051	[]
4	4	digestion	GO:0007586	1.76e-07	3.21e-06	3.57	0.49	4.84136	-12.6834	MGAM|3.5318;ACE|8.2414;AQP1|0.0133;PGA3|0.2208;SERPINA3|0.3436;TFF2|0.2655;APOA1|10.8643;PGC|7.5858;APOA4|3.2211	9	173	185	38520	http://www.ebi.ac.uk/QuickGO/GTerm?id=GO:0007586	[]
5	4,5	regulation of cell death	GO:0010941	1.78e-07	3.21e-06	22.43	2.34	4.84136	-12.6834	CTSB|0.3105;CD14|0.8241;HBB|1.6749;GSN|0.0718;S100A9|0.0619;OLFM4|10.7647;LTF|26.7917;SERPINB13|0.3373;HBA1|1.5996;CTSC|0.3076;HSPB1|0.3837;CTSH|0.4699;AQP1|0.0133;PARK7|5.9704;YWHAZ|2.704;HP|34.3558;CRYAB|0.2333;PRDX2|57.0164;SLC9A3R1|3.8726;CAT|22.4905;TIMP1|18.197;SOD1|5.7016;IL1RN|0.2729;APOE|0.5105;ANXA5|14.0605;NOV|2.9376;S100A8|0.1644;GLO1|4.4463	28	1929	185	38520	http://www.ebi.ac.uk/QuickGO/GTerm?id=GO:0010941	[]
5	5	NADH regeneration	GO:0006735	1.79e-07	3.21e-06	2.16	0.35	4.84136	-12.6834	PKM|4.9659;ALDOA|2.9923;PGK1|2.0324;TPI1|2.0893;GAPDH|2.2699	5	27	185	38520	http://www.ebi.ac.uk/QuickGO/GTerm?id=GO:0006735	[]
7	7	glycolytic process through glucose-6-phosphate	GO:0061620	1.79e-07	3.21e-06	2.16	0.35	4.84136	-12.6834	PKM|4.9659;ALDOA|2.9923;PGK1|2.0324;TPI1|2.0893;GAPDH|2.2699	5	27	185	38520	http://www.ebi.ac.uk/QuickGO/GTerm?id=GO:0061620	[]
6	6	glycolytic process through fructose-6-phosphate	GO:0061615	1.79e-07	3.21e-06	2.16	0.35	4.84136	-12.6834	PKM|4.9659;ALDOA|2.9923;PGK1|2.0324;TPI1|2.0893;GAPDH|2.2699	5	27	185	38520	http://www.ebi.ac.uk/QuickGO/GTerm?id=GO:0061615	[]
9	9	glucose catabolic process to pyruvate	GO:0061718	1.79e-07	3.21e-06	2.16	0.35	4.84136	-12.6834	PKM|4.9659;ALDOA|2.9923;PGK1|2.0324;TPI1|2.0893;GAPDH|2.2699	5	27	185	38520	http://www.ebi.ac.uk/QuickGO/GTerm?id=GO:0061718	[]
8	6,8	canonical glycolysis	GO:0061621	1.79e-07	3.21e-06	2.16	0.35	4.84136	-12.6834	PKM|4.9659;ALDOA|2.9923;PGK1|2.0324;TPI1|2.0893;GAPDH|2.2699	5	27	185	38520	http://www.ebi.ac.uk/QuickGO/GTerm?id=GO:0061621	[]
3	3	cellular response to stimulus	GO:0051716	2.05e-07	3.64e-06	-73.47	-7.09	4.84136	-12.6834	UBA1|0.0107;LASP1|0.0281;CTSB|0.3105;CD14|0.8241;HSP90AA1|2.466;MME|2.2284;GSN|0.0718;P06314|0.0809;LRG1|0.8017;MSN|3.9084;MYLK|0.7516;MDH1|2.7542;S100A9|0.0619;OLFM4|10.7647;CNDP2|2.6303;PGLYRP1|0.1722;VTN|0.0809;LTF|26.7917;LCP1|3.5645;COL6A1|0.3162;PGLYRP2|0.3945;AHSG|0.1432;CTSC|0.3076;BCAM|0.4875;VCAM1|9.4624;HSPB1|0.3837;CTSH|0.4699;AQP1|0.0133;SERPINB3|0.0377;KLK3|65.4636;FOLR1|0.2188;PARK…	88	11418	185	38520	http://www.ebi.ac.uk/QuickGO/GTerm?id=GO:0051716	[]
5	5	multicellular organismal catabolic process	GO:0044243	2.05e-07	3.64e-06	-6.28	-0.48	4.84136	-12.6834	CTSB|0.3105;COL6A1|0.3162;ACE|8.2414;COL15A1|0.1556;MMP7|0.0817;APOA4|3.2211;KLK6|0.0112	7	86	185	38520	http://www.ebi.ac.uk/QuickGO/GTerm?id=GO:0044243	[]
3	3	organic substance metabolic process	GO:0071704	2.1e-07	3.7e-06	-102.07	-9.9	4.84136	-12.6834	VWF|1.3804;UBA1|0.0107;SEMG1|41.6869;CST6|0.0614;CTSB|0.3105;CD14|0.8241;HSP90AA1|2.466;MME|2.2284;CSTA|0.177;PKM|4.9659;CPQ|0.3565;GAA|0.6026;ALDOA|2.9923;GSN|0.0718;LUM|0.2421;P06314|0.0809;PDCD6IP|2.0701;MSN|3.9084;MYLK|0.7516;MDH1|2.7542;MGAM|3.5318;SERPINC1|0.6026;DPP4|2.3335;RNASE1|0.8166;PRDX6|8.9536;S100A9|0.0619;PPIC|9.6383;MAN2B2|0.3048;DDT|4.5709;CNDP2|2.6303;PGLYRP1|0.1722;VTN|0.0809;…	139	21962	185	38520	http://www.ebi.ac.uk/QuickGO/GTerm?id=GO:0071704	[]
6	6	regulation of wound healing	GO:0061041	2.13e-07	3.74e-06	-5.64	-0.42	4.84136	-12.6834	GSN|0.0718;MYLK|0.7516;SERPINC1|0.6026;S100A9|0.0619;VTN|0.0809;APOE|0.5105;ANXA5|14.0605;PLG|0.3908	8	128	185	38520	http://www.ebi.ac.uk/QuickGO/GTerm?id=GO:0061041	[]
7	7	acute-phase response	GO:0006953	2.15e-07	3.76e-06	-3.97	-0.26	4.84136	-12.6834	AHSG|0.1432;HP|34.3558;SERPINA3|0.3436;FN1|2.3988;SERPINA1|0.6546;IL1RN|0.2729	6	53	185	38520	http://www.ebi.ac.uk/QuickGO/GTerm?id=GO:0006953	[]
3	3	multi-multicellular organism process	GO:0044706	2.44e-07	4.24e-06	-0.63	0.07	4.84136	-12.6834	SEMG1|41.6869;CTSB|0.3105;SPP1|0.1738;IGFBP2|0.0698;TIMP1|18.197;SOD1|5.7016;IL1RN|0.2729;MMP7|0.0817;HEXB|1.3804;SCGB1A1|8.5507	10	236	185	38520	http://www.ebi.ac.uk/QuickGO/GTerm?id=GO:0044706	[]
7	7	protein nitrosylation	GO:0017014	2.47e-07	4.24e-06	0.72	0.21	4.84136	-12.6834	S100A9|0.0619;ACE|8.2414;GAPDH|2.2699;S100A8|0.1644	4	12	185	38520	http://www.ebi.ac.uk/QuickGO/GTerm?id=GO:0017014	[]
5	5	keratan sulfate catabolic process	GO:0042340	2.47e-07	4.24e-06	-1.41	0	4.84136	-12.6834	LUM|0.2421;GLB1|0.52;GNS|0.4246;HEXB|1.3804	4	12	185	38520	http://www.ebi.ac.uk/QuickGO/GTerm?id=GO:0042340	[]
8	8	peptidyl-cysteine S-nitrosylation	GO:0018119	2.47e-07	4.24e-06	0.72	0.21	4.84136	-12.6834	S100A9|0.0619;ACE|8.2414;GAPDH|2.2699;S100A8|0.1644	4	12	185	38520	http://www.ebi.ac.uk/QuickGO/GTerm?id=GO:0018119	[]
8	5,8	humoral immune response mediated by circulating immunoglobulin	GO:0002455	2.58e-07	4.41e-06	-7.55	-0.61	4.84136	-12.6834	P06314|0.0809;MASP2|0.4446;P01594|0.0643;IGHG3|0.2992;C3|1.3804;C4A|0.3467;P01614|0.7727;P01616|0.0145;P01617|0.0146	9	181	185	38520	http://www.ebi.ac.uk/QuickGO/GTerm?id=GO:0002455	[]
4	4	response to nutrient	GO:0007584	2.71e-07	4.6e-06	-7.68	-0.62	4.84136	-12.6834	PKM|4.9659;GSN|0.0718;SERPINC1|0.6026;FOLR1|0.2188;SPP1|0.1738;CAT|22.4905;SERPINA7|0.2188;IGFBP2|0.0698;APOA1|10.8643	9	182	185	38520	http://www.ebi.ac.uk/QuickGO/GTerm?id=GO:0007584	[]
7	7	hexose catabolic process	GO:0019320	3.01e-07	5.09e-06	2.44	0.38	4.84136	-12.6834	PKM|4.9659;ALDOA|2.9923;PGK1|2.0324;TPI1|2.0893;GAPDH|2.2699;GLB1|0.52	6	56	185	38520	http://www.ebi.ac.uk/QuickGO/GTerm?id=GO:0019320	[]
5	5	aminoglycan metabolic process	GO:0006022	3.08e-07	5.18e-06	-4.04	-0.26	4.84136	-12.6834	LUM|0.2421;PGLYRP1|0.1722;PGLYRP2|0.3945;BGN|0.1995;EGF|0.7943;GLB1|0.52;GNS|0.4246;CTBS|0.3908;HEXB|1.3804;NAGLU|0.5546	10	242	185	38520	http://www.ebi.ac.uk/QuickGO/GTerm?id=GO:0006022	[]
3	2,3	regulation of biological process	GO:0050789	3.21e-07	5.38e-06	-95.48	-9.25	4.84136	-12.6834	KRT16|0.1995;IGFBP7|0.0824;SEMG1|41.6869;LASP1|0.0281;CST6|0.0614;CTSB|0.3105;PDZK1|11.695;CD14|0.8241;HBB|1.6749;HSP90AA1|2.466;MME|2.2284;CSTA|0.177;GAA|0.6026;ALDOA|2.9923;GSN|0.0718;LUM|0.2421;P06314|0.0809;LRG1|0.8017;PDCD6IP|2.0701;MSN|3.9084;MYLK|0.7516;MDH1|2.7542;REG1A|0.0258;SERPINC1|0.6026;DPP4|2.3335;S100A9|0.0619;OLFM4|10.7647;PGLYRP1|0.1722;VTN|0.0809;LTF|26.7917;SERPINB13|0.3373;LC…	126	19171	185	38520	http://www.ebi.ac.uk/QuickGO/GTerm?id=GO:0050789	[]
4	4	regulation of multicellular organismal development	GO:2000026	3.25e-07	5.43e-06	-21.31	-1.96	4.84136	-12.6834	LRG1|0.8017;PGLYRP1|0.1722;LTF|26.7917;PGLYRP2|0.3945;AHSG|0.1432;ACE|8.2414;HSPB1|0.3837;CTSH|0.4699;AQP1|0.0133;SERPINB3|0.0377;KLK3|65.4636;EGF|0.7943;SPINK5|0.1406;SPP1|0.1738;FN1|2.3988;CA2|8.7096;VASN|0.0982;TIMP1|18.197;SOD1|5.7016;IL1RN|0.2729;APOE|0.5105;APOA1|10.8643;C3|1.3804;PI16|0.182;NEU1|0.597;KLK6|0.0112	26	1748	185	38520	http://www.ebi.ac.uk/QuickGO/GTerm?id=GO:2000026	[]
5	5	cellular protein metabolic process	GO:0044267	3.27e-07	5.44e-06	-54.21	-5.19	4.84136	-12.6834	UBA1|0.0107;SEMG1|41.6869;CST6|0.0614;CTSB|0.3105;CD14|0.8241;HSP90AA1|2.466;MME|2.2284;CSTA|0.177;GSN|0.0718;PDCD6IP|2.0701;MSN|3.9084;MYLK|0.7516;SERPINC1|0.6026;S100A9|0.0619;PPIC|9.6383;MAN2B2|0.3048;VTN|0.0809;LTF|26.7917;SERPINB13|0.3373;BRD1|0.0125;AHSG|0.1432;CTSC|0.3076;ACE|8.2414;HSPB1|0.3837;CTSH|0.4699;AQP1|0.0133;BGN|0.1995;RDX|1.5704;SERPINB3|0.0377;PROZ|4.1305;KLK3|65.4636;SERPINA5…	74	8998	185	38520	http://www.ebi.ac.uk/QuickGO/GTerm?id=GO:0044267	[]
6	6	epithelial cell differentiation	GO:0030855	3.31e-07	5.48e-06	-4.29	-0.29	4.84136	-12.6834	KRT16|0.1995;CTSB|0.3105;CSTA|0.177;MSN|3.9084;KRT2|13.0617;PGK1|2.0324;RDX|1.5704;KRT10|5.3951;SPINK5|0.1406;KRT4|0.0817;SLC9A3R1|3.8726;SOD1|5.7016;SPRR3|0.5495;SPRR1A|0.0555;SPRR2A|0.2148	15	614	185	38520	http://www.ebi.ac.uk/QuickGO/GTerm?id=GO:0030855	[]
6	6	apoptotic process	GO:0006915	3.35e-07	5.52e-06	-23.26	-2.15	4.84136	-12.6834	CTSB|0.3105;CD14|0.8241;GSN|0.0718;PDCD6IP|2.0701;S100A9|0.0619;OLFM4|10.7647;LTF|26.7917;SERPINB13|0.3373;CTSC|0.3076;HSPB1|0.3837;CTSH|0.4699;AQP1|0.0133;LCN2|0.2208;PARK7|5.9704;YWHAZ|2.704;CRYAB|0.2333;CDH1|0.8091;GAPDH|2.2699;PRDX2|57.0164;SHISA5|0.2704;SLC9A3R1|3.8726;CAT|22.4905;LAMP1|2.6062;TIMP1|18.197;SOD1|5.7016;IL1RN|0.2729;APOE|0.5105;ANXA5|14.0605;DNASE1|0.138;S100A8|0.1644;GLO1|4.4…	31	2364	185	38520	http://www.ebi.ac.uk/QuickGO/GTerm?id=GO:0006915	[]
5	5	cardiovascular system development	GO:0072358	3.6e-07	5.87e-06	-12.9	-1.13	4.84136	-12.6834	GAA|0.6026;LRG1|0.8017;MYLK|0.7516;HSPB1|0.3837;CTSH|0.4699;AQP1|0.0133;KLK3|65.4636;FOLR1|0.2188;COL15A1|0.1556;EGF|0.7943;SPINK5|0.1406;CDH13|0.1706;FN1|2.3988;FBN1|0.1585;APOE|0.5105;C3|1.3804;PRCP|0.0685;PI16|0.182;CPE|21.0863	19	991	185	38520	http://www.ebi.ac.uk/QuickGO/GTerm?id=GO:0072358	[]
5	5	circulatory system development	GO:0072359	3.6e-07	5.87e-06	-12.9	-1.13	4.84136	-12.6834	GAA|0.6026;LRG1|0.8017;MYLK|0.7516;HSPB1|0.3837;CTSH|0.4699;AQP1|0.0133;KLK3|65.4636;FOLR1|0.2188;COL15A1|0.1556;EGF|0.7943;SPINK5|0.1406;CDH13|0.1706;FN1|2.3988;FBN1|0.1585;APOE|0.5105;C3|1.3804;PRCP|0.0685;PI16|0.182;CPE|21.0863	19	991	185	38520	http://www.ebi.ac.uk/QuickGO/GTerm?id=GO:0072359	[]
3	3	regulation of developmental process	GO:0050793	3.72e-07	6.04e-06	-25.29	-2.35	4.84136	-12.6834	ALDOA|2.9923;GSN|0.0718;LRG1|0.8017;MSN|3.9084;OLFM4|10.7647;PGLYRP1|0.1722;LTF|26.7917;PGLYRP2|0.3945;AHSG|0.1432;ACE|8.2414;HSPB1|0.3837;CTSH|0.4699;AQP1|0.0133;SERPINB3|0.0377;KLK3|65.4636;EGF|0.7943;SPINK5|0.1406;SPP1|0.1738;FN1|2.3988;SLC9A3R1|3.8726;CA2|8.7096;VASN|0.0982;TIMP1|18.197;SOD1|5.7016;IL1RN|0.2729;APOE|0.5105;APOA1|10.8643;C3|1.3804;HEXB|1.3804;PI16|0.182;NEU1|0.597;KLK6|0.0112	32	2504	185	38520	http://www.ebi.ac.uk/QuickGO/GTerm?id=GO:0050793	[]
6	4,5,6	negative regulation of cellular metabolic process	GO:0031324	3.9e-07	6.31e-06	-27.48	-2.57	4.84136	-12.6834	CST6|0.0614;CSTA|0.177;SERPINC1|0.6026;VTN|0.0809;SERPINB13|0.3373;AHSG|0.1432;HSPB1|0.3837;AQP1|0.0133;PRG4|0.3631;SERPINB3|0.0377;SERPINA5|0.0698;PARK7|5.9704;HP|34.3558;A2ML1|0.2168;HSPA8|2.3988;SERPINA6|0.3873;SERPINA3|0.3436;SPINK5|0.1406;CRYAB|0.2333;GAPDH|2.2699;SERPINA1|0.6546;SLC9A3R1|3.8726;SERPINI1|12.1339;CAT|22.4905;SERPINA7|0.2188;SPINK1|0.0113;TIMP1|18.197;APOE|0.5105;C3|1.3804;A2M…	34	2772	185	38520	http://www.ebi.ac.uk/QuickGO/GTerm?id=GO:0031324	[]
4	4	negative regulation of response to external stimulus	GO:0032102	4.14e-07	6.68e-06	-7.72	-0.62	4.84136	-12.6834	SERPINC1|0.6026;PGLYRP1|0.1722;VTN|0.0809;LTF|26.7917;TFF2|0.2655;SPP1|0.1738;APOE|0.5105;ANXA5|14.0605;APOA1|10.8643;PLG|0.3908	10	250	185	38520	http://www.ebi.ac.uk/QuickGO/GTerm?id=GO:0032102	[]
4	4	blood vessel development	GO:0001568	4.31e-07	6.92e-06	-9.82	-0.83	4.84136	-12.6834	LRG1|0.8017;MYLK|0.7516;HSPB1|0.3837;CTSH|0.4699;AQP1|0.0133;KLK3|65.4636;FOLR1|0.2188;COL15A1|0.1556;EGF|0.7943;SPINK5|0.1406;CDH13|0.1706;FN1|2.3988;APOE|0.5105;C3|1.3804;PRCP|0.0685	15	627	185	38520	http://www.ebi.ac.uk/QuickGO/GTerm?id=GO:0001568	[]
4	4	regulation of cell growth	GO:0001558	4.5e-07	7.18e-06	-9.22	-0.77	4.84136	-12.6834	IGFBP7|0.0824;S100A9|0.0619;CRYAB|0.2333;SPP1|0.1738;PAPPA2|8.8716;CDH13|0.1706;FN1|2.3988;IGFBP2|0.0698;APOE|0.5105;NOV|2.9376;S100A8|0.1644;PI16|0.182	12	388	185	38520	http://www.ebi.ac.uk/QuickGO/GTerm?id=GO:0001558	[]
5	5	carbohydrate derivative catabolic process	GO:1901136	4.79e-07	7.62e-06	-4.17	-0.27	4.84136	-12.6834	LUM|0.2421;PGLYRP1|0.1722;PGLYRP2|0.3945;BGN|0.1995;GLB1|0.52;GNS|0.4246;CTBS|0.3908;HEXB|1.3804;NEU1|0.597;NAGLU|0.5546	10	254	185	38520	http://www.ebi.ac.uk/QuickGO/GTerm?id=GO:1901136	[]
4	4	macromolecule metabolic process	GO:0043170	4.91e-07	7.77e-06	-89.46	-8.66	4.84136	-12.6834	VWF|1.3804;UBA1|0.0107;SEMG1|41.6869;CST6|0.0614;CTSB|0.3105;CD14|0.8241;HSP90AA1|2.466;MME|2.2284;CSTA|0.177;CPQ|0.3565;GAA|0.6026;GSN|0.0718;LUM|0.2421;P06314|0.0809;PDCD6IP|2.0701;MSN|3.9084;MYLK|0.7516;MGAM|3.5318;SERPINC1|0.6026;DPP4|2.3335;RNASE1|0.8166;S100A9|0.0619;PPIC|9.6383;MAN2B2|0.3048;CNDP2|2.6303;PGLYRP1|0.1722;VTN|0.0809;LTF|26.7917;SERPINB13|0.3373;COL6A1|0.3162;PGLYRP2|0.3945;BR…	123	18641	185	38520	http://www.ebi.ac.uk/QuickGO/GTerm?id=GO:0043170	[]
8	8	glucose catabolic process	GO:0006007	5.15e-07	8.12e-06	2.16	0.35	4.84136	-12.6834	PKM|4.9659;ALDOA|2.9923;PGK1|2.0324;TPI1|2.0893;GAPDH|2.2699	5	33	185	38520	http://www.ebi.ac.uk/QuickGO/GTerm?id=GO:0006007	[]
5	5	regulation of cell-cell adhesion	GO:0022407	5.58e-07	8.76e-06	0	0.14	4.84136	-12.6834	GSN|0.0718;DPP4|2.3335;VCAM1|9.4624;SPINK5|0.1406;CDH1|0.8091;HLA-DRA|1.406;IGFBP2|0.0698;SOD1|5.7016;IL1RN|0.2729;APOA1|10.8643;PLG|0.3908;SCGB1A1|8.5507	12	396	185	38520	http://www.ebi.ac.uk/QuickGO/GTerm?id=GO:0022407	[]
6	5,6	positive regulation of cell-substrate adhesion	GO:0010811	5.78e-07	9.03e-06	-2.45	-0.11	4.84136	-12.6834	OLFM4|10.7647;VTN|0.0809;NID1|0.5058;SPP1|0.1738;CDH13|0.1706;FN1|2.3988;APOA1|10.8643	7	100	185	38520	http://www.ebi.ac.uk/QuickGO/GTerm?id=GO:0010811	[]
4	4	cytokine production	GO:0001816	5.92e-07	9.21e-06	-5.45	-0.4	4.84136	-12.6834	CD14|0.8241;LUM|0.2421;S100A9|0.0619;PGLYRP1|0.1722;LTF|26.7917;PGLYRP2|0.3945;HSPB1|0.3837;PRG4|0.3631;PARK7|5.9704;FN1|2.3988;SOD1|5.7016;APOA1|10.8643;S100A8|0.1644;C3|1.3804;SCGB1A1|8.5507	15	643	185	38520	http://www.ebi.ac.uk/QuickGO/GTerm?id=GO:0001816	[]
7	6,7	positive regulation of peptidase activity	GO:0010952	5.98e-07	9.27e-06	-7.48	-0.6	4.84136	-12.6834	SEMG1|41.6869;CD14|0.8241;GSN|0.0718;S100A9|0.0619;CTSC|0.3076;CTSH|0.4699;SERPINB3|0.0377;FN1|2.3988;S100A8|0.1644	9	200	185	38520	http://www.ebi.ac.uk/QuickGO/GTerm?id=GO:0010952	[]
5	5	cellular response to organic substance	GO:0071310	6.24e-07	9.63e-06	-23.05	-2.13	4.84136	-12.6834	CTSB|0.3105;CD14|0.8241;MME|2.2284;LRG1|0.8017;MSN|3.9084;VTN|0.0809;LTF|26.7917;COL6A1|0.3162;AHSG|0.1432;VCAM1|9.4624;HSPB1|0.3837;CTSH|0.4699;AQP1|0.0133;FOLR1|0.2188;PARK7|5.9704;KRT13|0.0373;EGF|0.7943;TFF2|0.2655;AOC1|2.0701;CDH1|0.8091;GAPDH|2.2699;CDH13|0.1706;CD63|5.7016;FBN1|0.1585;PTPRN|0.7047;HLA-DRA|1.406;VASN|0.0982;CAT|22.4905;IGFBP2|0.0698;SOD1|5.7016;IL1RN|0.2729;APOA1|10.8643;PR…	33	2696	185	38520	http://www.ebi.ac.uk/QuickGO/GTerm?id=GO:0071310	[]
5	5	vasculature development	GO:0001944	6.64e-07	1.02e-05	-9.82	-0.83	4.84136	-12.6834	LRG1|0.8017;MYLK|0.7516;HSPB1|0.3837;CTSH|0.4699;AQP1|0.0133;KLK3|65.4636;FOLR1|0.2188;COL15A1|0.1556;EGF|0.7943;SPINK5|0.1406;CDH13|0.1706;FN1|2.3988;APOE|0.5105;C3|1.3804;PRCP|0.0685	15	649	185	38520	http://www.ebi.ac.uk/QuickGO/GTerm?id=GO:0001944	[]
6	6	renal absorption	GO:0070293	6.75e-07	1.03e-05	2.21	0.35	4.84136	-12.6834	HBB|1.6749;GSN|0.0718;AQP1|0.0133;SLC9A3R1|3.8726	4	15	185	38520	http://www.ebi.ac.uk/QuickGO/GTerm?id=GO:0070293	[]
6	5,6	homotypic cell-cell adhesion	GO:0034109	7.16e-07	1.09e-05	2.53	0.38	4.84136	-12.6834	HBB|1.6749;GSN|0.0718;DPP4|2.3335;S100A9|0.0619;LCP1|3.5645;VCAM1|9.4624;HSPB1|0.3837;SPINK5|0.1406;DSC2|0.118;HLA-DRA|1.406;IGFBP2|0.0698;SOD1|5.7016;S100A8|0.1644;SCGB1A1|8.5507	14	566	185	38520	http://www.ebi.ac.uk/QuickGO/GTerm?id=GO:0034109	[]
6	6	glycosaminoglycan metabolic process	GO:0030203	7.66e-07	1.16e-05	-3.64	-0.22	4.84136	-12.6834	LUM|0.2421;PGLYRP1|0.1722;PGLYRP2|0.3945;BGN|0.1995;EGF|0.7943;GLB1|0.52;GNS|0.4246;HEXB|1.3804;NAGLU|0.5546	9	206	185	38520	http://www.ebi.ac.uk/QuickGO/GTerm?id=GO:0030203	[]
4	3,4	cell growth	GO:0016049	9.11e-07	1.38e-05	-9.54	-0.8	4.84136	-12.6834	IGFBP7|0.0824;S100A9|0.0619;CRYAB|0.2333;SPP1|0.1738;PAPPA2|8.8716;CDH13|0.1706;FN1|2.3988;IGFBP2|0.0698;APOE|0.5105;NOV|2.9376;S100A8|0.1644;PI16|0.182;SLC3A2|0.4742	13	494	185	38520	http://www.ebi.ac.uk/QuickGO/GTerm?id=GO:0016049	[]
4	4	single-organism carbohydrate metabolic process	GO:0044723	9.61e-07	1.45e-05	0.17	0.15	4.84136	-12.6834	PKM|4.9659;GAA|0.6026;ALDOA|2.9923;MDH1|2.7542;MGAM|3.5318;MAN2B2|0.3048;PGK1|2.0324;FABP5|0.0296;EGF|0.7943;CTSA|0.4571;TPI1|2.0893;GAPDH|2.2699;GLB1|0.52;LRP2|0.1459;SORD|13.1826;CTBS|0.3908;HEXB|1.3804;MAN1A1|0.1096;NEU1|0.597;IDH1|6.9183	20	1164	185	38520	http://www.ebi.ac.uk/QuickGO/GTerm?id=GO:0044723	[]
5	5	superoxide metabolic process	GO:0006801	9.67e-07	1.45e-05	5.2	0.65	4.84136	-12.6834	PARK7|5.9704;PRDX2|57.0164;PRDX1|2.9107;SOD1|5.7016;APOA4|3.2211;SOD3|8.7902	6	68	185	38520	http://www.ebi.ac.uk/QuickGO/GTerm?id=GO:0006801	[]
6	6	hexose metabolic process	GO:0019318	1.05e-06	1.57e-05	6.26	0.75	4.84136	-12.6834	PKM|4.9659;GAA|0.6026;ALDOA|2.9923;MDH1|2.7542;MAN2B2|0.3048;PGK1|2.0324;FABP5|0.0296;TPI1|2.0893;GAPDH|2.2699;GLB1|0.52;SORD|13.1826	11	346	185	38520	http://www.ebi.ac.uk/QuickGO/GTerm?id=GO:0019318	[]
5	4,5	regulation of cell activation	GO:0050865	1.06e-06	1.58e-05	-3.6	-0.22	4.84136	-12.6834	GSN|0.0718;DPP4|2.3335;PGLYRP1|0.1722;PGLYRP2|0.3945;VCAM1|9.4624;SPINK5|0.1406;TFF2|0.2655;HLA-DRA|1.406;IGFBP2|0.0698;LAMP1|2.6062;SOD1|5.7016;APOE|0.5105;SCGB1A1|8.5507	13	501	185	38520	http://www.ebi.ac.uk/QuickGO/GTerm?id=GO:0050865	[]
6	4,5,6	negative regulation of macromolecule metabolic process	GO:0010605	1.21e-06	1.79e-05	-25.95	-2.42	4.84136	-12.6834	CST6|0.0614;CSTA|0.177;SERPINC1|0.6026;VTN|0.0809;SERPINB13|0.3373;AHSG|0.1432;HSPB1|0.3837;AQP1|0.0133;PRG4|0.3631;SERPINB3|0.0377;SERPINA5|0.0698;PARK7|5.9704;A2ML1|0.2168;HSPA8|2.3988;SERPINA6|0.3873;SERPINA3|0.3436;SPINK5|0.1406;CRYAB|0.2333;GAPDH|2.2699;SERPINA1|0.6546;SLC9A3R1|3.8726;SERPINI1|12.1339;CAT|22.4905;SERPINA7|0.2188;SPINK1|0.0113;TIMP1|18.197;APOE|0.5105;C3|1.3804;A2M|22.9087;SC…	33	2778	185	38520	http://www.ebi.ac.uk/QuickGO/GTerm?id=GO:0010605	[]
6	4,5,6	positive regulation of endocytosis	GO:0045807	1.25e-06	1.84e-05	-3.98	-0.26	4.84136	-12.6834	CD14|0.8241;VTN|0.0809;AHSG|0.1432;LMAN2|0.2466;CD63|5.7016;C3|1.3804;C4A|0.3467	7	112	185	38520	http://www.ebi.ac.uk/QuickGO/GTerm?id=GO:0045807	[]
6	6	monosaccharide catabolic process	GO:0046365	1.25e-06	1.84e-05	2.44	0.38	4.84136	-12.6834	PKM|4.9659;ALDOA|2.9923;PGK1|2.0324;TPI1|2.0893;GAPDH|2.2699;GLB1|0.52	6	71	185	38520	http://www.ebi.ac.uk/QuickGO/GTerm?id=GO:0046365	[]
4	4	regulation of immune effector process	GO:0002697	1.26e-06	1.84e-05	-0.75	0.06	4.84136	-12.6834	MYLK|0.7516;MDH1|2.7542;PGLYRP1|0.1722;VTN|0.0809;PGLYRP2|0.3945;LAMP1|2.6062;ANXA5|14.0605;APOA1|10.8643;C3|1.3804;A2M|22.9087;KRT6A|0.1127;C4A|0.3467	12	428	185	38520	http://www.ebi.ac.uk/QuickGO/GTerm?id=GO:0002697	[]
3	3	regulation of cellular process	GO:0050794	1.31e-06	1.92e-05	-93.22	-9.03	4.84136	-12.6834	KRT16|0.1995;IGFBP7|0.0824;SEMG1|41.6869;LASP1|0.0281;CST6|0.0614;CTSB|0.3105;PDZK1|11.695;CD14|0.8241;HBB|1.6749;HSP90AA1|2.466;CSTA|0.177;ALDOA|2.9923;GSN|0.0718;LUM|0.2421;P06314|0.0809;LRG1|0.8017;PDCD6IP|2.0701;MSN|3.9084;MYLK|0.7516;MDH1|2.7542;REG1A|0.0258;SERPINC1|0.6026;DPP4|2.3335;S100A9|0.0619;OLFM4|10.7647;PGLYRP1|0.1722;VTN|0.0809;LTF|26.7917;SERPINB13|0.3373;LCP1|3.5645;HBA1|1.5996;…	120	18280	185	38520	http://www.ebi.ac.uk/QuickGO/GTerm?id=GO:0050794	[]
6	6	positive regulation of proteolysis	GO:0045862	1.38e-06	2.01e-05	-8.02	-0.65	4.84136	-12.6834	SEMG1|41.6869;CD14|0.8241;GSN|0.0718;S100A9|0.0619;CTSC|0.3076;CTSH|0.4699;SERPINB3|0.0377;EGF|0.7943;FN1|2.3988;APOE|0.5105;S100A8|0.1644;C3|1.3804	12	432	185	38520	http://www.ebi.ac.uk/QuickGO/GTerm?id=GO:0045862	[]
8	5,6,8	antibacterial humoral response	GO:0019731	1.39e-06	2.01e-05	6.25	0.75	4.84136	-12.6834	SEMG1|41.6869;LTF|26.7917;KLK3|65.4636;MMP7|0.0817;IGHA2|1.977	5	40	185	38520	http://www.ebi.ac.uk/QuickGO/GTerm?id=GO:0019731	[]
5	4,5	regulation of vesicle-mediated transport	GO:0060627	1.62e-06	2.34e-05	2.36	0.37	4.84136	-12.6834	CD14|0.8241;PDCD6IP|2.0701;MSN|3.9084;OLFM4|10.7647;VTN|0.0809;AHSG|0.1432;RDX|1.5704;LMAN2|0.2466;CDH13|0.1706;CD63|5.7016;LAMP1|2.6062;SPINK1|0.0113;C3|1.3804;C4A|0.3467	14	607	185	38520	http://www.ebi.ac.uk/QuickGO/GTerm?id=GO:0060627	[]
5	4,5	positive regulation of cell death	GO:0010942	1.63e-06	2.34e-05	4.35	0.56	4.84136	-12.6834	CD14|0.8241;HBB|1.6749;GSN|0.0718;S100A9|0.0619;HBA1|1.5996;CTSC|0.3076;CTSH|0.4699;PARK7|5.9704;YWHAZ|2.704;HP|34.3558;SLC9A3R1|3.8726;SOD1|5.7016;APOE|0.5105;ANXA5|14.0605;S100A8|0.1644	15	698	185	38520	http://www.ebi.ac.uk/QuickGO/GTerm?id=GO:0010942	[]
5	5	cellular response to oxygen-containing compound	GO:1901701	1.67e-06	2.38e-05	-0.69	0.07	4.84136	-12.6834	CD14|0.8241;MSN|3.9084;LTF|26.7917;COL6A1|0.3162;AHSG|0.1432;AQP1|0.0133;FOLR1|0.2188;PARK7|5.9704;KRT13|0.0373;AOC1|2.0701;CDH1|0.8091;PRDX2|57.0164;PRDX1|2.9107;FBN1|0.1585;SOD1|5.7016;IL1RN|0.2729;APOA4|3.2211;SOD3|8.7902	18	994	185	38520	http://www.ebi.ac.uk/QuickGO/GTerm?id=GO:1901701	[]
5	5	regulation of cell-substrate adhesion	GO:0010810	1.76e-06	2.5e-05	-5.77	-0.43	4.84136	-12.6834	OLFM4|10.7647;VTN|0.0809;NID1|0.5058;SPP1|0.1738;CDH13|0.1706;FN1|2.3988;APOA1|10.8643;PLG|0.3908	8	169	185	38520	http://www.ebi.ac.uk/QuickGO/GTerm?id=GO:0010810	[]
8	8	peptidyl-cysteine modification	GO:0018198	1.78e-06	2.52e-05	1.99	0.33	4.84136	-12.6834	S100A9|0.0619;ACE|8.2414;PARK7|5.9704;GAPDH|2.2699;S100A8|0.1644	5	42	185	38520	http://www.ebi.ac.uk/QuickGO/GTerm?id=GO:0018198	[]
6	4,6	regulation of protein activation cascade	GO:2000257	1.78e-06	2.52e-05	-1.5	-0.01	4.84136	-12.6834	SERPINC1|0.6026;VTN|0.0809;C3|1.3804;A2M|22.9087;C4A|0.3467	5	42	185	38520	http://www.ebi.ac.uk/QuickGO/GTerm?id=GO:2000257	[]
5	5	adaptive immune response based on somatic recombination of immune receptors built from immunoglobulin superfamily domains	GO:0002460	1.86e-06	2.62e-05	-8.39	-0.69	4.84136	-12.6834	P06314|0.0809;CTSC|0.3076;CTSH|0.4699;MASP2|0.4446;P01594|0.0643;IGHG3|0.2992;C3|1.3804;C4A|0.3467;P01614|0.7727;P01616|0.0145;P01617|0.0146	11	367	185	38520	http://www.ebi.ac.uk/QuickGO/GTerm?id=GO:0002460	[]
5	5	macromolecule catabolic process	GO:0009057	1.92e-06	2.7e-05	-14.87	-1.33	4.84136	-12.6834	UBA1|0.0107;CTSB|0.3105;GAA|0.6026;LUM|0.2421;PDCD6IP|2.0701;MSN|3.9084;MGAM|3.5318;PGLYRP1|0.1722;PGLYRP2|0.3945;CTSC|0.3076;ACE|8.2414;CTSH|0.4699;BGN|0.1995;RDX|1.5704;PARK7|5.9704;PGA3|0.2208;EGF|0.7943;GLB1|0.52;GNS|0.4246;TIMP1|18.197;APOE|0.5105;DNASE1|0.138;CTBS|0.3908;HEXB|1.3804;PGC|7.5858;NAGLU|0.5546	26	1923	185	38520	http://www.ebi.ac.uk/QuickGO/GTerm?id=GO:0009057	[]
6	5,6	leukocyte cell-cell adhesion	GO:0007159	1.94e-06	2.71e-05	9.98	1.12	4.84136	-12.6834	GSN|0.0718;MSN|3.9084;DPP4|2.3335;S100A9|0.0619;LCP1|3.5645;VCAM1|9.4624;SPINK5|0.1406;HLA-DRA|1.406;IGFBP2|0.0698;SOD1|5.7016;S100A8|0.1644;SCGB1A1|8.5507;APOA4|3.2211	13	529	185	38520	http://www.ebi.ac.uk/QuickGO/GTerm?id=GO:0007159	[]
5	4,5	negative regulation of cell death	GO:0060548	2.03e-06	2.82e-05	15.11	1.62	4.84136	-12.6834	CTSB|0.3105;LTF|26.7917;SERPINB13|0.3373;HSPB1|0.3837;CTSH|0.4699;AQP1|0.0133;PARK7|5.9704;YWHAZ|2.704;CRYAB|0.2333;PRDX2|57.0164;CAT|22.4905;TIMP1|18.197;SOD1|5.7016;IL1RN|0.2729;APOE|0.5105;ANXA5|14.0605;NOV|2.9376;GLO1|4.4463	18	1008	185	38520	http://www.ebi.ac.uk/QuickGO/GTerm?id=GO:0060548	[]
6	6	cellular response to reactive oxygen species	GO:0034614	2.21e-06	3.07e-05	7.08	0.83	4.84136	-12.6834	AQP1|0.0133;PARK7|5.9704;PRDX2|57.0164;PRDX1|2.9107;SOD1|5.7016;APOA4|3.2211;SOD3|8.7902	7	122	185	38520	http://www.ebi.ac.uk/QuickGO/GTerm?id=GO:0034614	[]
5	4,5	antimicrobial humoral response	GO:0019730	2.26e-06	3.12e-05	6.25	0.75	4.84136	-12.6834	SEMG1|41.6869;LTF|26.7917;KLK3|65.4636;MMP7|0.0817;IGHA2|1.977	5	44	185	38520	http://www.ebi.ac.uk/QuickGO/GTerm?id=GO:0019730	[]
6	5,6	regulation of endocytosis	GO:0030100	2.27e-06	3.13e-05	-5.78	-0.43	4.84136	-12.6834	CD14|0.8241;OLFM4|10.7647;VTN|0.0809;AHSG|0.1432;LMAN2|0.2466;CDH13|0.1706;CD63|5.7016;C3|1.3804;C4A|0.3467	9	235	185	38520	http://www.ebi.ac.uk/QuickGO/GTerm?id=GO:0030100	[]
7	4,5,6,7	blood coagulation, intrinsic pathway	GO:0007597	2.35e-06	3.22e-05	-0.12	0.12	4.84136	-12.6834	VWF|1.3804;SERPINC1|0.6026;A2M|22.9087;PRCP|0.0685	4	20	185	38520	http://www.ebi.ac.uk/QuickGO/GTerm?id=GO:0007597	[]
4	4	response to acid chemical	GO:0001101	2.49e-06	3.41e-05	-10.04	-0.85	4.84136	-12.6834	GSN|0.0718;COL6A1|0.3162;CTSH|0.4699;AQP1|0.0133;FOLR1|0.2188;KRT13|0.0373;CAT|22.4905;SERPINA7|0.2188;IGFBP2|0.0698;SCGB1A1|8.5507	10	305	185	38520	http://www.ebi.ac.uk/QuickGO/GTerm?id=GO:0001101	[]
4	4	carbohydrate derivative metabolic process	GO:1901135	2.57e-06	3.5e-05	-14.02	-1.24	4.84136	-12.6834	PKM|4.9659;ALDOA|2.9923;LUM|0.2421;PGLYRP1|0.1722;PGLYRP2|0.3945;AQP1|0.0133;PGK1|2.0324;BGN|0.1995;PARK7|5.9704;HSPA8|2.3988;EGF|0.7943;CTSA|0.4571;TPI1|2.0893;GAPDH|2.2699;BHMT|0.8166;GLB1|0.52;ACPP|64.2688;GNS|0.4246;LRP2|0.1459;APOE|0.5105;ARSA|0.5754;CTBS|0.3908;HEXB|1.3804;MAN1A1|0.1096;NEU1|0.597;NAGLU|0.5546	26	1954	185	38520	http://www.ebi.ac.uk/QuickGO/GTerm?id=GO:1901135	[]
5	5	positive regulation of cellular catabolic process	GO:0031331	2.7e-06	3.67e-05	6.67	0.79	4.84136	-12.6834	MSN|3.9084;MYLK|0.7516;MDH1|2.7542;CTSC|0.3076;RDX|1.5704;PARK7|5.9704;EGF|0.7943;APOE|0.5105;ANXA5|14.0605;APOA1|10.8643;KRT6A|0.1127;APOA4|3.2211	12	461	185	38520	http://www.ebi.ac.uk/QuickGO/GTerm?id=GO:0031331	[]
5	4,5	cellular modified amino acid metabolic process	GO:0006575	2.72e-06	3.67e-05	6.52	0.78	4.84136	-12.6834	CPQ|0.3565;CNDP2|2.6303;CKB|15.1356;FOLR1|0.2188;PARK7|5.9704;BHMT|0.8166;SOD1|5.7016;GLO1|4.4463;GGT1|5.0582;IDH1|6.9183	10	308	185	38520	http://www.ebi.ac.uk/QuickGO/GTerm?id=GO:0006575	[]
5	5	oligosaccharide metabolic process	GO:0009311	2.72e-06	3.67e-05	-2.5	-0.11	4.84136	-12.6834	GAA|0.6026;MGAM|3.5318;CTBS|0.3908;HEXB|1.3804;MAN1A1|0.1096;NEU1|0.597	6	81	185	38520	http://www.ebi.ac.uk/QuickGO/GTerm?id=GO:0009311	[]
8	6,7,8	keratinocyte differentiation	GO:0030216	2.74e-06	3.68e-05	-5.48	-0.4	4.84136	-12.6834	KRT16|0.1995;CSTA|0.177;KRT2|13.0617;KRT10|5.3951;SPRR3|0.5495;SPRR1A|0.0555;SPRR2A|0.2148	7	126	185	38520	http://www.ebi.ac.uk/QuickGO/GTerm?id=GO:0030216	[]
4	4	regeneration	GO:0031099	2.81e-06	3.76e-05	-6.83	-0.54	4.84136	-12.6834	PKM|4.9659;CPQ|0.3565;GSN|0.0718;SPP1|0.1738;APOE|0.5105;APOA1|10.8643;APOA4|3.2211;KLK6|0.0112	8	180	185	38520	http://www.ebi.ac.uk/QuickGO/GTerm?id=GO:0031099	[]
7	7	peptide cross-linking	GO:0018149	2.83e-06	3.77e-05	-3.35	-0.19	4.84136	-12.6834	CSTA|0.177;BGN|0.1995;FN1|2.3988;SPRR3|0.5495;SPRR1A|0.0555	5	46	185	38520	http://www.ebi.ac.uk/QuickGO/GTerm?id=GO:0018149	[]
4	4	positive regulation of cell adhesion	GO:0045785	2.94e-06	3.9e-05	4.07	0.54	4.84136	-12.6834	DPP4|2.3335;OLFM4|10.7647;VTN|0.0809;VCAM1|9.4624;NID1|0.5058;SPP1|0.1738;CDH13|0.1706;FN1|2.3988;HLA-DRA|1.406;IGFBP2|0.0698;APOA1|10.8643	11	385	185	38520	http://www.ebi.ac.uk/QuickGO/GTerm?id=GO:0045785	[]
5	5	cellular response to oxidative stress	GO:0034599	2.99e-06	3.95e-05	9.03	1.02	4.84136	-12.6834	HSPB1|0.3837;AQP1|0.0133;PARK7|5.9704;HP|34.3558;PRDX2|57.0164;PRDX1|2.9107;SOD1|5.7016;APOA4|3.2211;SOD3|8.7902	9	243	185	38520	http://www.ebi.ac.uk/QuickGO/GTerm?id=GO:0034599	[]
8	7,8	positive regulation of endopeptidase activity	GO:0010950	3.05e-06	4.02e-05	-7.1	-0.56	4.84136	-12.6834	SEMG1|41.6869;CD14|0.8241;GSN|0.0718;S100A9|0.0619;CTSC|0.3076;CTSH|0.4699;SERPINB3|0.0377;S100A8|0.1644	8	182	185	38520	http://www.ebi.ac.uk/QuickGO/GTerm?id=GO:0010950	[]
4	4	response to nitrogen compound	GO:1901698	3.09e-06	4.05e-05	-12.81	-1.12	4.84136	-12.6834	CTSB|0.3105;PKM|4.9659;GSN|0.0718;COL6A1|0.3162;AHSG|0.1432;AQP1|0.0133;GGH|0.492;FOLR1|0.2188;AOC1|2.0701;CDH1|0.8091;FBN1|0.1585;PTPRN|0.7047;CAT|22.4905;SERPINA7|0.2188;TIMP1|18.197;SOD1|5.7016;IL1RN|0.2729;SLC3A2|0.4742	18	1039	185	38520	http://www.ebi.ac.uk/QuickGO/GTerm?id=GO:1901698	[]
6	4,5,6	regulation of leukocyte activation	GO:0002694	3.29e-06	4.31e-05	1.3	0.26	4.84136	-12.6834	GSN|0.0718;DPP4|2.3335;PGLYRP1|0.1722;PGLYRP2|0.3945;VCAM1|9.4624;SPINK5|0.1406;TFF2|0.2655;HLA-DRA|1.406;IGFBP2|0.0698;LAMP1|2.6062;SOD1|5.7016;SCGB1A1|8.5507	12	470	185	38520	http://www.ebi.ac.uk/QuickGO/GTerm?id=GO:0002694	[]
4	4	response to organonitrogen compound	GO:0010243	3.39e-06	4.42e-05	-12.49	-1.09	4.84136	-12.6834	CTSB|0.3105;PKM|4.9659;GSN|0.0718;COL6A1|0.3162;AHSG|0.1432;AQP1|0.0133;GGH|0.492;FOLR1|0.2188;AOC1|2.0701;CDH1|0.8091;FBN1|0.1585;PTPRN|0.7047;CAT|22.4905;SERPINA7|0.2188;TIMP1|18.197;SOD1|5.7016;IL1RN|0.2729	17	941	185	38520	http://www.ebi.ac.uk/QuickGO/GTerm?id=GO:0010243	[]
6	4,5,6	positive regulation of cellular metabolic process	GO:0031325	3.65e-06	4.74e-05	11.07	1.22	4.84136	-12.6834	SEMG1|41.6869;CD14|0.8241;HBB|1.6749;HSP90AA1|2.466;GSN|0.0718;LUM|0.2421;MSN|3.9084;MYLK|0.7516;MDH1|2.7542;S100A9|0.0619;VTN|0.0809;LTF|26.7917;CTSC|0.3076;ACE|8.2414;HSPB1|0.3837;CTSH|0.4699;RDX|1.5704;SERPINB3|0.0377;PARK7|5.9704;HSPA8|2.3988;EGF|0.7943;TFF2|0.2655;CDH1|0.8091;CDH13|0.1706;FN1|2.3988;CD63|5.7016;CAT|22.4905;SOD1|5.7016;IL1RN|0.2729;APOE|0.5105;ANXA5|14.0605;APOA1|10.8643;S100…	37	3491	185	38520	http://www.ebi.ac.uk/QuickGO/GTerm?id=GO:0031325	[]
4	4	angiogenesis	GO:0001525	3.67e-06	4.75e-05	-8.74	-0.72	4.84136	-12.6834	LRG1|0.8017;HSPB1|0.3837;CTSH|0.4699;AQP1|0.0133;KLK3|65.4636;COL15A1|0.1556;EGF|0.7943;SPINK5|0.1406;CDH13|0.1706;FN1|2.3988;C3|1.3804;PRCP|0.0685	12	475	185	38520	http://www.ebi.ac.uk/QuickGO/GTerm?id=GO:0001525	[]
4	4	sulfur compound metabolic process	GO:0006790	3.75e-06	4.83e-05	7.38	0.86	4.84136	-12.6834	LUM|0.2421;CNDP2|2.6303;BGN|0.1995;BHMT|0.8166;GLB1|0.52;ACPP|64.2688;GNS|0.4246;SOD1|5.7016;GLO1|4.4463;HEXB|1.3804;GGT1|5.0582;IDH1|6.9183	12	476	185	38520	http://www.ebi.ac.uk/QuickGO/GTerm?id=GO:0006790	[]
4	4	female pregnancy	GO:0007565	3.88e-06	4.98e-05	-7.02	-0.56	4.84136	-12.6834	CTSB|0.3105;SPP1|0.1738;IGFBP2|0.0698;TIMP1|18.197;SOD1|5.7016;IL1RN|0.2729;MMP7|0.0817;SCGB1A1|8.5507	8	188	185	38520	http://www.ebi.ac.uk/QuickGO/GTerm?id=GO:0007565	[]
3	3	regulation of growth	GO:0040008	3.97e-06	5.09e-05	-10.12	-0.86	4.84136	-12.6834	IGFBP7|0.0824;S100A9|0.0619;CRYAB|0.2333;SPP1|0.1738;PAPPA2|8.8716;CDH13|0.1706;FN1|2.3988;IGFBP2|0.0698;SOD1|5.7016;APOE|0.5105;NOV|2.9376;S100A8|0.1644;C3|1.3804;PI16|0.182	14	656	185	38520	http://www.ebi.ac.uk/QuickGO/GTerm?id=GO:0040008	[]
7	7	immunoglobulin mediated immune response	GO:0016064	4.02e-06	5.13e-05	-7.55	-0.61	4.84136	-12.6834	P06314|0.0809;MASP2|0.4446;P01594|0.0643;IGHG3|0.2992;C3|1.3804;C4A|0.3467;P01614|0.7727;P01616|0.0145;P01617|0.0146	9	252	185	38520	http://www.ebi.ac.uk/QuickGO/GTerm?id=GO:0016064	[]
5	5	peptide catabolic process	GO:0043171	4.25e-06	5.4e-05	-0.84	0.05	4.84136	-12.6834	CPQ|0.3565;ACE|8.2414;CTSH|0.4699;GGT1|5.0582	4	23	185	38520	http://www.ebi.ac.uk/QuickGO/GTerm?id=GO:0043171	[]
4	4	keratinization	GO:0031424	4.3e-06	5.46e-05	-4	-0.26	4.84136	-12.6834	KRT16|0.1995;KRT2|13.0617;SPRR3|0.5495;SPRR1A|0.0555;SPRR2A|0.2148	5	50	185	38520	http://www.ebi.ac.uk/QuickGO/GTerm?id=GO:0031424	[]
6	6	B cell mediated immunity	GO:0019724	4.42e-06	5.59e-05	-7.55	-0.61	4.84136	-12.6834	P06314|0.0809;MASP2|0.4446;P01594|0.0643;IGHG3|0.2992;C3|1.3804;C4A|0.3467;P01614|0.7727;P01616|0.0145;P01617|0.0146	9	255	185	38520	http://www.ebi.ac.uk/QuickGO/GTerm?id=GO:0019724	[]
7	7	glucose metabolic process	GO:0006006	5.02e-06	6.28e-05	5.46	0.67	4.84136	-12.6834	PKM|4.9659;GAA|0.6026;ALDOA|2.9923;MDH1|2.7542;PGK1|2.0324;FABP5|0.0296;TPI1|2.0893;GAPDH|2.2699;SORD|13.1826	9	259	185	38520	http://www.ebi.ac.uk/QuickGO/GTerm?id=GO:0006006	[]
6	4,6	regulation of hemostasis	GO:1900046	5.04e-06	6.28e-05	-4.37	-0.29	4.84136	-12.6834	SERPINC1|0.6026;S100A9|0.0619;VTN|0.0809;APOE|0.5105;ANXA5|14.0605;PLG|0.3908	6	90	185	38520	http://www.ebi.ac.uk/QuickGO/GTerm?id=GO:1900046	[]
7	5,6,7	regulation of blood coagulation	GO:0030193	5.04e-06	6.28e-05	-4.37	-0.29	4.84136	-12.6834	SERPINC1|0.6026;S100A9|0.0619;VTN|0.0809;APOE|0.5105;ANXA5|14.0605;PLG|0.3908	6	90	185	38520	http://www.ebi.ac.uk/QuickGO/GTerm?id=GO:0030193	[]
9	8,9	NAD metabolic process	GO:0019674	5.04e-06	6.28e-05	2.6	0.39	4.84136	-12.6834	PKM|4.9659;ALDOA|2.9923;MDH1|2.7542;PGK1|2.0324;TPI1|2.0893;GAPDH|2.2699	6	90	185	38520	http://www.ebi.ac.uk/QuickGO/GTerm?id=GO:0019674	[]
5	4,5	regulation of cytokine production	GO:0001817	5.16e-06	6.41e-05	2.72	0.4	4.84136	-12.6834	CD14|0.8241;LUM|0.2421;PGLYRP1|0.1722;LTF|26.7917;PGLYRP2|0.3945;HSPB1|0.3837;PRG4|0.3631;PARK7|5.9704;FN1|2.3988;SOD1|5.7016;APOA1|10.8643;C3|1.3804;SCGB1A1|8.5507	13	579	185	38520	http://www.ebi.ac.uk/QuickGO/GTerm?id=GO:0001817	[]
7	5,6,7	regulation of lymphocyte activation	GO:0051249	5.34e-06	6.62e-05	4.32	0.56	4.84136	-12.6834	GSN|0.0718;DPP4|2.3335;PGLYRP1|0.1722;PGLYRP2|0.3945;VCAM1|9.4624;SPINK5|0.1406;HLA-DRA|1.406;IGFBP2|0.0698;LAMP1|2.6062;SOD1|5.7016;SCGB1A1|8.5507	11	410	185	38520	http://www.ebi.ac.uk/QuickGO/GTerm?id=GO:0051249	[]
7	5,6,7	regulation of apoptotic signaling pathway	GO:2001233	5.47e-06	6.73e-05	-7.03	-0.56	4.84136	-12.6834	CD14|0.8241;GSN|0.0718;S100A9|0.0619;CTSC|0.3076;HSPB1|0.3837;CTSH|0.4699;PARK7|5.9704;YWHAZ|2.704;SLC9A3R1|3.8726;SOD1|5.7016;S100A8|0.1644	11	411	185	38520	http://www.ebi.ac.uk/QuickGO/GTerm?id=GO:2001233	[]
6	6	response to estrogen	GO:0043627	5.47e-06	6.73e-05	0.35	0.17	4.84136	-12.6834	AQP1|0.0133;CRYAB|0.2333;PTPRN|0.7047;CA2|8.7096;CAT|22.4905;IGFBP2|0.0698;APOA1|10.8643;C3|1.3804	8	197	185	38520	http://www.ebi.ac.uk/QuickGO/GTerm?id=GO:0043627	[]
4	4	multicellular organismal metabolic process	GO:0044236	5.52e-06	6.76e-05	-6.28	-0.48	4.84136	-12.6834	CTSB|0.3105;COL6A1|0.3162;ACE|8.2414;COL15A1|0.1556;MMP7|0.0817;APOA4|3.2211;KLK6|0.0112	7	140	185	38520	http://www.ebi.ac.uk/QuickGO/GTerm?id=GO:0044236	[]
9	7,9	regulation of cysteine-type endopeptidase activity involved in apoptotic process	GO:0043281	5.68e-06	6.94e-05	-7.34	-0.59	4.84136	-12.6834	CD14|0.8241;GSN|0.0718;S100A9|0.0619;CTSC|0.3076;CTSH|0.4699;AQP1|0.0133;PARK7|5.9704;CRYAB|0.2333;S100A8|0.1644	9	263	185	38520	http://www.ebi.ac.uk/QuickGO/GTerm?id=GO:0043281	[]
5	5	immune response-regulating signaling pathway	GO:0002764	5.78e-06	7.04e-05	-10.75	-0.92	4.84136	-12.6834	CTSB|0.3105;CD14|0.8241;HSP90AA1|2.466;P06314|0.0809;PGLYRP1|0.1722;LTF|26.7917;PGLYRP2|0.3945;CTSH|0.4699;EGF|0.7943;HLA-DRA|1.406;P01594|0.0643;IGHG3|0.2992;P01614|0.7727;P01616|0.0145;P01617|0.0146	15	775	185	38520	http://www.ebi.ac.uk/QuickGO/GTerm?id=GO:0002764	[]
6	6	oligosaccharide catabolic process	GO:0009313	6e-06	7.25e-05	-0.14	0.12	4.84136	-12.6834	CTBS|0.3908;HEXB|1.3804;NEU1|0.597	3	8	185	38520	http://www.ebi.ac.uk/QuickGO/GTerm?id=GO:0009313	[]
7	7	regulation of serine-type peptidase activity	GO:1902571	6e-06	7.25e-05	-1.62	-0.02	4.84136	-12.6834	SEMG1|41.6869;SPINK5|0.1406;SPINK1|0.0113	3	8	185	38520	http://www.ebi.ac.uk/QuickGO/GTerm?id=GO:1902571	[]
5	5	monosaccharide metabolic process	GO:0005996	6.86e-06	8.27e-05	6.26	0.75	4.84136	-12.6834	PKM|4.9659;GAA|0.6026;ALDOA|2.9923;MDH1|2.7542;MAN2B2|0.3048;PGK1|2.0324;FABP5|0.0296;TPI1|2.0893;GAPDH|2.2699;GLB1|0.52;SORD|13.1826	11	421	185	38520	http://www.ebi.ac.uk/QuickGO/GTerm?id=GO:0005996	[]
9	6,7,8,9	positive regulation of intrinsic apoptotic signaling pathway	GO:2001244	6.93e-06	8.3e-05	1.99	0.33	4.84136	-12.6834	S100A9|0.0619;PARK7|5.9704;SLC9A3R1|3.8726;SOD1|5.7016;S100A8|0.1644	5	55	185	38520	http://www.ebi.ac.uk/QuickGO/GTerm?id=GO:2001244	[]
9	7,8,9	bicarbonate transport	GO:0015701	6.93e-06	8.3e-05	4.97	0.62	4.84136	-12.6834	HBB|1.6749;HBA1|1.5996;AQP1|0.0133;CA2|8.7096;CA1|52.9663	5	55	185	38520	http://www.ebi.ac.uk/QuickGO/GTerm?id=GO:0015701	[]
6	5,6	regulation of reactive oxygen species metabolic process	GO:2000377	7.27e-06	8.68e-05	5.48	0.67	4.84136	-12.6834	HBB|1.6749;HSP90AA1|2.466;PARK7|5.9704;HP|34.3558;CRYAB|0.2333;SOD1|5.7016;PRCP|0.0685	7	146	185	38520	http://www.ebi.ac.uk/QuickGO/GTerm?id=GO:2000377	[]
5	5	cellular lipid catabolic process	GO:0044242	7.33e-06	8.72e-05	5.52	0.68	4.84136	-12.6834	PRDX6|8.9536;FABP5|0.0296;APOE|0.5105;APOA1|10.8643;HEXB|1.3804;APOA4|3.2211;NEU1|0.597;IDH1|6.9183	8	205	185	38520	http://www.ebi.ac.uk/QuickGO/GTerm?id=GO:0044242	[]
8	6,7,8	organic anion transport	GO:0015711	7.52e-06	8.92e-05	10.92	1.21	4.84136	-12.6834	PDZK1|11.695;HBB|1.6749;HBA1|1.5996;ACE|8.2414;AQP1|0.0133;FOLR1|0.2188;SLC9A3R1|3.8726;CA2|8.7096;CA1|52.9663;IL1RN|0.2729;APOE|0.5105;APOA1|10.8643;APOA4|3.2211;SLC3A2|0.4742	14	694	185	38520	http://www.ebi.ac.uk/QuickGO/GTerm?id=GO:0015711	[]
5	4,5	regulation of coagulation	GO:0050818	7.78e-06	9.2e-05	-4.37	-0.29	4.84136	-12.6834	SERPINC1|0.6026;S100A9|0.0619;VTN|0.0809;APOE|0.5105;ANXA5|14.0605;PLG|0.3908	6	97	185	38520	http://www.ebi.ac.uk/QuickGO/GTerm?id=GO:0050818	[]
7	6,7	regulation of apoptotic process	GO:0042981	7.83e-06	9.23e-05	-20	-1.83	4.84136	-12.6834	CTSB|0.3105;CD14|0.8241;GSN|0.0718;S100A9|0.0619;OLFM4|10.7647;LTF|26.7917;SERPINB13|0.3373;CTSC|0.3076;HSPB1|0.3837;CTSH|0.4699;AQP1|0.0133;PARK7|5.9704;YWHAZ|2.704;CRYAB|0.2333;PRDX2|57.0164;SLC9A3R1|3.8726;CAT|22.4905;TIMP1|18.197;SOD1|5.7016;IL1RN|0.2729;APOE|0.5105;ANXA5|14.0605;S100A8|0.1644;GLO1|4.4463	24	1824	185	38520	http://www.ebi.ac.uk/QuickGO/GTerm?id=GO:0042981	[]
8	8	regulation of cysteine-type endopeptidase activity	GO:2000116	8.13e-06	9.55e-05	-7.34	-0.59	4.84136	-12.6834	CD14|0.8241;GSN|0.0718;S100A9|0.0619;CTSC|0.3076;CTSH|0.4699;AQP1|0.0133;PARK7|5.9704;CRYAB|0.2333;S100A8|0.1644	9	275	185	38520	http://www.ebi.ac.uk/QuickGO/GTerm?id=GO:2000116	[]
6	4,5,6	blood coagulation, fibrin clot formation	GO:0072378	8.29e-06	9.71e-05	-0.12	0.12	4.84136	-12.6834	VWF|1.3804;SERPINC1|0.6026;A2M|22.9087;PRCP|0.0685	4	27	185	38520	http://www.ebi.ac.uk/QuickGO/GTerm?id=GO:0072378	[]
8	5,7,8	exocytosis	GO:0006887	8.42e-06	9.83e-05	9.54	1.07	4.84136	-12.6834	VWF|1.3804;ALDOA|2.9923;PDCD6IP|2.0701;EGF|0.7943;FN1|2.3988;SERPINA1|0.6546;CD63|5.7016;LAMP1|2.6062;SPINK1|0.0113;TIMP1|18.197;SOD1|5.7016;APOA1|10.8643;A2M|22.9087;PLG|0.3908	14	701	185	38520	http://www.ebi.ac.uk/QuickGO/GTerm?id=GO:0006887	[]
5	4,5	positive regulation of catabolic process	GO:0009896	8.45e-06	9.84e-05	6.67	0.79	4.84136	-12.6834	MSN|3.9084;MYLK|0.7516;MDH1|2.7542;CTSC|0.3076;RDX|1.5704;PARK7|5.9704;EGF|0.7943;APOE|0.5105;ANXA5|14.0605;APOA1|10.8643;KRT6A|0.1127;APOA4|3.2211	12	516	185	38520	http://www.ebi.ac.uk/QuickGO/GTerm?id=GO:0009896	[]
6	5,6	regulation of programmed cell death	GO:0043067	8.73e-06	0.000101	-20	-1.83	4.84136	-12.6834	CTSB|0.3105;CD14|0.8241;GSN|0.0718;S100A9|0.0619;OLFM4|10.7647;LTF|26.7917;SERPINB13|0.3373;CTSC|0.3076;HSPB1|0.3837;CTSH|0.4699;AQP1|0.0133;PARK7|5.9704;YWHAZ|2.704;CRYAB|0.2333;PRDX2|57.0164;SLC9A3R1|3.8726;CAT|22.4905;TIMP1|18.197;SOD1|5.7016;IL1RN|0.2729;APOE|0.5105;ANXA5|14.0605;S100A8|0.1644;GLO1|4.4463	24	1836	185	38520	http://www.ebi.ac.uk/QuickGO/GTerm?id=GO:0043067	[]
4	4	system process	GO:0003008	8.74e-06	0.000101	-7.33	-0.59	4.84136	-12.6834	HBB|1.6749;MME|2.2284;GAA|0.6026;ALDOA|2.9923;GSN|0.0718;LUM|0.2421;MYLK|0.7516;ACE|8.2414;AQP1|0.0133;SERPINA3|0.3436;TFF2|0.2655;CRYAB|0.2333;DSC2|0.118;ACPP|64.2688;SLC9A3R1|3.8726;TPM4|0.3076;HLA-DRA|1.406;SOD1|5.7016;IL1RN|0.2729;APOE|0.5105;APOA1|10.8643;AZGP1|1.2246;PRCP|0.0685;HEXB|1.3804;PI16|0.182;APOA4|3.2211;IGHA2|1.977	27	2224	185	38520	http://www.ebi.ac.uk/QuickGO/GTerm?id=GO:0003008	[]
5	5	oxoacid metabolic process	GO:0043436	8.75e-06	0.000101	11.93	1.31	4.84136	-12.6834	PKM|4.9659;ALDOA|2.9923;LUM|0.2421;MDH1|2.7542;CNDP2|2.6303;GGH|0.492;PGK1|2.0324;BGN|0.1995;CKB|15.1356;FOLR1|0.2188;PARK7|5.9704;TPI1|2.0893;GAPDH|2.2699;BHMT|0.8166;GLB1|0.52;GNS|0.4246;IL1RN|0.2729;APOA1|10.8643;C3|1.3804;HEXB|1.3804;APOA4|3.2211;GGT1|5.0582;IDH1|6.9183	23	1711	185	38520	http://www.ebi.ac.uk/QuickGO/GTerm?id=GO:0043436	[]
8	5,6,7,8	positive regulation of cholesterol esterification	GO:0010873	8.96e-06	0.000103	0.29	0.16	4.84136	-12.6834	APOE|0.5105;APOA1|10.8643;APOA4|3.2211	3	9	185	38520	http://www.ebi.ac.uk/QuickGO/GTerm?id=GO:0010873	[]
4	4	adaptive immune response	GO:0002250	1.13e-05	0.000129	-8.39	-0.69	4.84136	-12.6834	P06314|0.0809;CTSC|0.3076;CTSH|0.4699;MASP2|0.4446;P01594|0.0643;IGHG3|0.2992;C3|1.3804;C4A|0.3467;P01614|0.7727;P01616|0.0145;P01617|0.0146	11	444	185	38520	http://www.ebi.ac.uk/QuickGO/GTerm?id=GO:0002250	[]
4	4	organic acid metabolic process	GO:0006082	1.13e-05	0.000129	11.93	1.31	4.84136	-12.6834	PKM|4.9659;ALDOA|2.9923;LUM|0.2421;MDH1|2.7542;CNDP2|2.6303;GGH|0.492;PGK1|2.0324;BGN|0.1995;CKB|15.1356;FOLR1|0.2188;PARK7|5.9704;TPI1|2.0893;GAPDH|2.2699;BHMT|0.8166;GLB1|0.52;GNS|0.4246;IL1RN|0.2729;APOA1|10.8643;C3|1.3804;HEXB|1.3804;APOA4|3.2211;GGT1|5.0582;IDH1|6.9183	23	1739	185	38520	http://www.ebi.ac.uk/QuickGO/GTerm?id=GO:0006082	[]
7	6,7	negative regulation of apoptotic process	GO:0043066	1.25e-05	0.000142	14.14	1.52	4.84136	-12.6834	LTF|26.7917;SERPINB13|0.3373;HSPB1|0.3837;CTSH|0.4699;AQP1|0.0133;PARK7|5.9704;YWHAZ|2.704;CRYAB|0.2333;PRDX2|57.0164;CAT|22.4905;TIMP1|18.197;SOD1|5.7016;IL1RN|0.2729;APOE|0.5105;ANXA5|14.0605;GLO1|4.4463	16	932	185	38520	http://www.ebi.ac.uk/QuickGO/GTerm?id=GO:0043066	[]
6	5,6	negative regulation of programmed cell death	GO:0043069	1.44e-05	0.000164	14.14	1.52	4.84136	-12.6834	LTF|26.7917;SERPINB13|0.3373;HSPB1|0.3837;CTSH|0.4699;AQP1|0.0133;PARK7|5.9704;YWHAZ|2.704;CRYAB|0.2333;PRDX2|57.0164;CAT|22.4905;TIMP1|18.197;SOD1|5.7016;IL1RN|0.2729;APOE|0.5105;ANXA5|14.0605;GLO1|4.4463	16	943	185	38520	http://www.ebi.ac.uk/QuickGO/GTerm?id=GO:0043069	[]
7	5,7	defense response to fungus	GO:0050832	1.46e-05	0.000166	-0.13	0.12	4.84136	-12.6834	S100A9|0.0619;LTF|26.7917;DCD|4.9204;S100A8|0.1644	4	31	185	38520	http://www.ebi.ac.uk/QuickGO/GTerm?id=GO:0050832	[]
7	6,7	regulation of phagocytosis	GO:0050764	1.58e-05	0.000179	-1.17	0.02	4.84136	-12.6834	OLFM4|10.7647;AHSG|0.1432;LMAN2|0.2466;C3|1.3804;C4A|0.3467	5	65	185	38520	http://www.ebi.ac.uk/QuickGO/GTerm?id=GO:0050764	[]
4	4	positive regulation of response to external stimulus	GO:0032103	1.63e-05	0.000183	-6.75	-0.53	4.84136	-12.6834	MYLK|0.7516;MDH1|2.7542;S100A9|0.0619;HSPB1|0.3837;PARK7|5.9704;CDH13|0.1706;ANXA5|14.0605;S100A8|0.1644;C3|1.3804;KRT6A|0.1127	10	378	185	38520	http://www.ebi.ac.uk/QuickGO/GTerm?id=GO:0032103	[]
6	5,6	regulation of digestive system process	GO:0044058	1.67e-05	0.000187	0.91	0.22	4.84136	-12.6834	AQP1|0.0133;TFF2|0.2655;APOA1|10.8643;APOA4|3.2211	4	32	185	38520	http://www.ebi.ac.uk/QuickGO/GTerm?id=GO:0044058	[]
7	5,6,7	regulation of cholesterol esterification	GO:0010872	1.75e-05	0.000195	0.29	0.16	4.84136	-12.6834	APOE|0.5105;APOA1|10.8643;APOA4|3.2211	3	11	185	38520	http://www.ebi.ac.uk/QuickGO/GTerm?id=GO:0010872	[]
8	5,6,8	high-density lipoprotein particle assembly	GO:0034380	1.75e-05	0.000195	0.29	0.16	4.84136	-12.6834	APOE|0.5105;APOA1|10.8643;APOA4|3.2211	3	11	185	38520	http://www.ebi.ac.uk/QuickGO/GTerm?id=GO:0034380	[]
5	4,5	positive regulation of cell proliferation	GO:0008284	1.78e-05	0.000198	-13.27	-1.17	4.84136	-12.6834	LRG1|0.8017;REG1A|0.0258;DPP4|2.3335;LTF|26.7917;VCAM1|9.4624;CTSH|0.4699;AQP1|0.0133;SERPINB3|0.0377;EGF|0.7943;TFF2|0.2655;CDH13|0.1706;FN1|2.3988;IGFBP2|0.0698;TIMP1|18.197;KRT6A|0.1127	15	853	185	38520	http://www.ebi.ac.uk/QuickGO/GTerm?id=GO:0008284	[]
7	6,7	protein oligomerization	GO:0051259	1.8e-05	0.000199	8.52	0.97	4.84136	-12.6834	VWF|1.3804;SEMG1|41.6869;HBB|1.6749;ALDOA|2.9923;OLFM4|10.7647;COL6A1|0.3162;HBA1|1.5996;AHNAK|0.0643;CRYAB|0.2333;CAT|22.4905;ANXA5|14.0605	11	467	185	38520	http://www.ebi.ac.uk/QuickGO/GTerm?id=GO:0051259	[]
6	5,6	keratan sulfate metabolic process	GO:0042339	1.89e-05	0.000209	-1.41	0	4.84136	-12.6834	LUM|0.2421;GLB1|0.52;GNS|0.4246;HEXB|1.3804	4	33	185	38520	http://www.ebi.ac.uk/QuickGO/GTerm?id=GO:0042339	[]
3	3	primary metabolic process	GO:0044238	2.01e-05	0.000221	-96.42	-9.34	4.84136	-12.6834	VWF|1.3804;UBA1|0.0107;SEMG1|41.6869;CST6|0.0614;CTSB|0.3105;CD14|0.8241;HSP90AA1|2.466;MME|2.2284;CSTA|0.177;PKM|4.9659;CPQ|0.3565;GAA|0.6026;ALDOA|2.9923;GSN|0.0718;LUM|0.2421;P06314|0.0809;PDCD6IP|2.0701;MSN|3.9084;MYLK|0.7516;MDH1|2.7542;MGAM|3.5318;SERPINC1|0.6026;DPP4|2.3335;RNASE1|0.8166;PRDX6|8.9536;S100A9|0.0619;PPIC|9.6383;MAN2B2|0.3048;CNDP2|2.6303;VTN|0.0809;LTF|26.7917;SERPINB13|0.33…	130	21295	185	38520	http://www.ebi.ac.uk/QuickGO/GTerm?id=GO:0044238	[]
6	5,6	gas transport	GO:0015669	2.13e-05	0.000234	3.71	0.5	4.84136	-12.6834	HBB|1.6749;HBA1|1.5996;AQP1|0.0133;HBD|25.5859	4	34	185	38520	http://www.ebi.ac.uk/QuickGO/GTerm?id=GO:0015669	[]
3	3	negative regulation of transport	GO:0051051	2.27e-05	0.000248	-4.4	-0.3	4.84136	-12.6834	SEMG1|41.6869;PARK7|5.9704;EGF|0.7943;TFF2|0.2655;CRYAB|0.2333;FN1|2.3988;SLC9A3R1|3.8726;SPINK1|0.0113;IL1RN|0.2729;APOE|0.5105;APOA1|10.8643	11	479	185	38520	http://www.ebi.ac.uk/QuickGO/GTerm?id=GO:0051051	[]
5	5	cell-matrix adhesion	GO:0007160	2.29e-05	0.000249	-5.32	-0.39	4.84136	-12.6834	VTN|0.0809;BCAM|0.4875;VCAM1|9.4624;NID1|0.5058;LYPD3|0.182;CDH13|0.1706;FN1|2.3988;CD63|5.7016	8	240	185	38520	http://www.ebi.ac.uk/QuickGO/GTerm?id=GO:0007160	[]
9	9	peptidyl-cysteine S-trans-nitrosylation	GO:0035606	2.29e-05	0.000249	0.85	0.22	4.84136	-12.6834	S100A9|0.0619;GAPDH|2.2699	2	2	185	38520	http://www.ebi.ac.uk/QuickGO/GTerm?id=GO:0035606	[]
8	7,8	neutrophil aggregation	GO:0070488	2.29e-05	0.000249	-1.99	-0.06	4.84136	-12.6834	S100A9|0.0619;S100A8|0.1644	2	2	185	38520	http://www.ebi.ac.uk/QuickGO/GTerm?id=GO:0070488	[]
4	4	regulation of system process	GO:0044057	2.31e-05	0.00025	4.34	0.56	4.84136	-12.6834	GAA|0.6026;ACE|8.2414;AQP1|0.0133;TFF2|0.2655;DSC2|0.118;ACPP|64.2688;SLC9A3R1|3.8726;SOD1|5.7016;APOA1|10.8643;PI16|0.182;APOA4|3.2211	11	480	185	38520	http://www.ebi.ac.uk/QuickGO/GTerm?id=GO:0044057	[]
3	3	multi-organism reproductive process	GO:0044703	2.38e-05	0.000257	1.09	0.24	4.84136	-12.6834	SEMG1|41.6869;CTSB|0.3105;ACE|8.2414;SERPINA5|0.0698;PARK7|5.9704;SPP1|0.1738;IGFBP2|0.0698;SPINK1|0.0113;TIMP1|18.197;SOD1|5.7016;IL1RN|0.2729;IGSF8|0.0973;MMP7|0.0817;HEXB|1.3804;SCGB1A1|8.5507;GGT1|5.0582	16	983	185	38520	http://www.ebi.ac.uk/QuickGO/GTerm?id=GO:0044703	[]
5	5	regulation of intracellular transport	GO:0032386	2.42e-05	0.00026	5.91	0.72	4.84136	-12.6834	PDZK1|11.695;MSN|3.9084;LCP1|3.5645;RDX|1.5704;PARK7|5.9704;YWHAZ|2.704;EGF|0.7943;CRYAB|0.2333;CDH1|0.8091;SLC9A3R1|3.8726;PRDX1|2.9107;LAMP1|2.6062	12	574	185	38520	http://www.ebi.ac.uk/QuickGO/GTerm?id=GO:0032386	[]
6	6	cellular response to metal ion	GO:0071248	2.5e-05	0.000269	1.31	0.26	4.84136	-12.6834	GSN|0.0718;AQP1|0.0133;KRT10|5.3951;AOC1|2.0701;CDH1|0.8091;SOD1|5.7016	6	119	185	38520	http://www.ebi.ac.uk/QuickGO/GTerm?id=GO:0071248	[]
6	4,6	immune response-activating signal transduction	GO:0002757	2.56e-05	0.000273	-10.32	-0.88	4.84136	-12.6834	CTSB|0.3105;CD14|0.8241;HSP90AA1|2.466;P06314|0.0809;PGLYRP1|0.1722;LTF|26.7917;PGLYRP2|0.3945;HLA-DRA|1.406;P01594|0.0643;IGHG3|0.2992;P01614|0.7727;P01616|0.0145;P01617|0.0146	13	674	185	38520	http://www.ebi.ac.uk/QuickGO/GTerm?id=GO:0002757	[]
7	7	hexose biosynthetic process	GO:0019319	2.88e-05	0.000307	3.02	0.43	4.84136	-12.6834	ALDOA|2.9923;MDH1|2.7542;PGK1|2.0324;TPI1|2.0893;GAPDH|2.2699;SORD|13.1826	6	122	185	38520	http://www.ebi.ac.uk/QuickGO/GTerm?id=GO:0019319	[]
4	3,4	maintenance of location	GO:0051235	2.9e-05	0.000308	-5.76	-0.43	4.84136	-12.6834	GAA|0.6026;GSN|0.0718;S100A9|0.0619;FBN1|0.1585;APOE|0.5105;APOA1|10.8643;S100A8|0.1644;C3|1.3804;HEXB|1.3804	9	323	185	38520	http://www.ebi.ac.uk/QuickGO/GTerm?id=GO:0051235	[]
9	6,7,9	very-low-density lipoprotein particle remodeling	GO:0034372	3.01e-05	0.000318	0.29	0.16	4.84136	-12.6834	APOE|0.5105;APOA1|10.8643;APOA4|3.2211	3	13	185	38520	http://www.ebi.ac.uk/QuickGO/GTerm?id=GO:0034372	[]
8	5,6,8	triglyceride-rich lipoprotein particle remodeling	GO:0034370	3.01e-05	0.000318	0.29	0.16	4.84136	-12.6834	APOE|0.5105;APOA1|10.8643;APOA4|3.2211	3	13	185	38520	http://www.ebi.ac.uk/QuickGO/GTerm?id=GO:0034370	[]
7	4,6,7	secretion by cell	GO:0032940	3.04e-05	0.000321	12.59	1.37	4.84136	-12.6834	VWF|1.3804;CD14|0.8241;ALDOA|2.9923;PDCD6IP|2.0701;AQP1|0.0133;HSPA8|2.3988;EGF|0.7943;FN1|2.3988;SERPINA1|0.6546;CD63|5.7016;PTPRN|0.7047;LAMP1|2.6062;SPINK1|0.0113;TIMP1|18.197;SOD1|5.7016;IL1RN|0.2729;APOA1|10.8643;A2M|22.9087;PLG|0.3908	19	1351	185	38520	http://www.ebi.ac.uk/QuickGO/GTerm?id=GO:0032940	[]
6	5,6	regulation of lipid biosynthetic process	GO:0046890	3.16e-05	0.000332	3.57	0.49	4.84136	-12.6834	SOD1|5.7016;APOE|0.5105;APOA1|10.8643;C3|1.3804;APOA4|3.2211;IDH1|6.9183	6	124	185	38520	http://www.ebi.ac.uk/QuickGO/GTerm?id=GO:0046890	[]
7	6,7	leukocyte aggregation	GO:0070486	3.23e-05	0.000338	5.14	0.64	4.84136	-12.6834	GSN|0.0718;DPP4|2.3335;S100A9|0.0619;LCP1|3.5645;VCAM1|9.4624;SPINK5|0.1406;HLA-DRA|1.406;IGFBP2|0.0698;SOD1|5.7016;S100A8|0.1644;SCGB1A1|8.5507	11	498	185	38520	http://www.ebi.ac.uk/QuickGO/GTerm?id=GO:0070486	[]
6	5,6	skin development	GO:0043588	3.24e-05	0.000338	-6.34	-0.49	4.84136	-12.6834	KRT16|0.1995;CSTA|0.177;KRT2|13.0617;KRT10|5.3951;SPINK5|0.1406;SPRR3|0.5495;SPRR1A|0.0555;SPRR2A|0.2148	8	252	185	38520	http://www.ebi.ac.uk/QuickGO/GTerm?id=GO:0043588	[]
7	6,7	glycosphingolipid metabolic process	GO:0006687	3.39e-05	0.000354	-1.23	0.01	4.84136	-12.6834	CTSA|0.4571;GLB1|0.52;ARSA|0.5754;HEXB|1.3804;NEU1|0.597	5	76	185	38520	http://www.ebi.ac.uk/QuickGO/GTerm?id=GO:0006687	[]
5	5	multicellular organismal macromolecule metabolic process	GO:0044259	3.46e-05	0.000358	-5.77	-0.43	4.84136	-12.6834	CTSB|0.3105;COL6A1|0.3162;ACE|8.2414;COL15A1|0.1556;MMP7|0.0817;KLK6|0.0112	6	126	185	38520	http://www.ebi.ac.uk/QuickGO/GTerm?id=GO:0044259	[]
5	4,5	regulation of cellular response to stress	GO:0080135	3.46e-05	0.000358	10.13	1.13	4.84136	-12.6834	HSP90AA1|2.466;MYLK|0.7516;MDH1|2.7542;HSPB1|0.3837;SERPINB3|0.0377;PARK7|5.9704;HP|34.3558;HSPA8|2.3988;SPP1|0.1738;PRDX1|2.9107;SOD1|5.7016;IL1RN|0.2729;ANXA5|14.0605;KRT6A|0.1127	14	797	185	38520	http://www.ebi.ac.uk/QuickGO/GTerm?id=GO:0080135	[]
6	5,6	regulation of cellular protein localization	GO:1903827	3.47e-05	0.000359	6	0.73	4.84136	-12.6834	PDZK1|11.695;GSN|0.0718;MSN|3.9084;LCP1|3.5645;RDX|1.5704;PARK7|5.9704;YWHAZ|2.704;EGF|0.7943;CDH1|0.8091;SLC9A3R1|3.8726;PRDX1|2.9107	11	502	185	38520	http://www.ebi.ac.uk/QuickGO/GTerm?id=GO:1903827	[]
8	8	triglyceride catabolic process	GO:0019433	3.71e-05	0.00038	0.28	0.16	4.84136	-12.6834	FABP5|0.0296;APOE|0.5105;APOA1|10.8643;APOA4|3.2211	4	39	185	38520	http://www.ebi.ac.uk/QuickGO/GTerm?id=GO:0019433	[]
8	5,7,8	regulation of complement activation	GO:0030449	3.71e-05	0.00038	0.05	0.14	4.84136	-12.6834	VTN|0.0809;C3|1.3804;A2M|22.9087;C4A|0.3467	4	39	185	38520	http://www.ebi.ac.uk/QuickGO/GTerm?id=GO:0030449	[]
6	6	regulation of sterol transport	GO:0032371	3.71e-05	0.00038	-1.15	0.02	4.84136	-12.6834	EGF|0.7943;APOE|0.5105;APOA1|10.8643;APOA4|3.2211	4	39	185	38520	http://www.ebi.ac.uk/QuickGO/GTerm?id=GO:0032371	[]
7	7	regulation of cholesterol transport	GO:0032374	3.71e-05	0.00038	-1.15	0.02	4.84136	-12.6834	EGF|0.7943;APOE|0.5105;APOA1|10.8643;APOA4|3.2211	4	39	185	38520	http://www.ebi.ac.uk/QuickGO/GTerm?id=GO:0032374	[]
8	8	cholesterol esterification	GO:0034435	3.82e-05	0.000387	0.29	0.16	4.84136	-12.6834	APOE|0.5105;APOA1|10.8643;APOA4|3.2211	3	14	185	38520	http://www.ebi.ac.uk/QuickGO/GTerm?id=GO:0034435	[]
6	6	steroid esterification	GO:0034433	3.82e-05	0.000387	0.29	0.16	4.84136	-12.6834	APOE|0.5105;APOA1|10.8643;APOA4|3.2211	3	14	185	38520	http://www.ebi.ac.uk/QuickGO/GTerm?id=GO:0034433	[]
7	7	sterol esterification	GO:0034434	3.82e-05	0.000387	0.29	0.16	4.84136	-12.6834	APOE|0.5105;APOA1|10.8643;APOA4|3.2211	3	14	185	38520	http://www.ebi.ac.uk/QuickGO/GTerm?id=GO:0034434	[]
4	4	cell communication	GO:0007154	3.88e-05	0.000392	-60.71	-5.83	4.84136	-12.6834	PCDH1|0.4285;LASP1|0.0281;CTSB|0.3105;CD14|0.8241;HSP90AA1|2.466;GSN|0.0718;P06314|0.0809;LRG1|0.8017;MYLK|0.7516;MDH1|2.7542;S100A9|0.0619;OLFM4|10.7647;PGLYRP1|0.1722;VTN|0.0809;LTF|26.7917;LCP1|3.5645;PGLYRP2|0.3945;AHSG|0.1432;CTSC|0.3076;BCAM|0.4875;VCAM1|9.4624;HSPB1|0.3837;CTSH|0.4699;AQP1|0.0133;SERPINB3|0.0377;KLK3|65.4636;FOLR1|0.2188;PARK7|5.9704;YWHAZ|2.704;HSPA8|2.3988;COL15A1|0.1556…	75	10366	185	38520	http://www.ebi.ac.uk/QuickGO/GTerm?id=GO:0007154	[]
6	5,6	amide transport	GO:0042886	3.89e-05	0.000392	-8.32	-0.68	4.84136	-12.6834	S100A9|0.0619;AQP1|0.0133;FOLR1|0.2188;SLC9A3R1|3.8726;PRDX1|2.9107;PTPRN|0.7047;CA2|8.7096;IL1RN|0.2729;S100A8|0.1644;MMP7|0.0817	10	419	185	38520	http://www.ebi.ac.uk/QuickGO/GTerm?id=GO:0042886	[]
6	6	monosaccharide biosynthetic process	GO:0046364	3.95e-05	0.000397	3.02	0.43	4.84136	-12.6834	ALDOA|2.9923;MDH1|2.7542;PGK1|2.0324;TPI1|2.0893;GAPDH|2.2699;SORD|13.1826	6	129	185	38520	http://www.ebi.ac.uk/QuickGO/GTerm?id=GO:0046364	[]
5	5	collagen catabolic process	GO:0030574	4.09e-05	0.00041	-4.85	-0.34	4.84136	-12.6834	CTSB|0.3105;COL6A1|0.3162;COL15A1|0.1556;MMP7|0.0817;KLK6|0.0112	5	79	185	38520	http://www.ebi.ac.uk/QuickGO/GTerm?id=GO:0030574	[]
6	6	response to cadmium ion	GO:0046686	4.11e-05	0.000411	4.37	0.57	4.84136	-12.6834	GSN|0.0718;SORD|13.1826;CAT|22.4905;SOD1|5.7016	4	40	185	38520	http://www.ebi.ac.uk/QuickGO/GTerm?id=GO:0046686	[]
7	5,6,7	apoptotic signaling pathway	GO:0097190	4.48e-05	0.000447	-8.01	-0.65	4.84136	-12.6834	CD14|0.8241;GSN|0.0718;S100A9|0.0619;CTSC|0.3076;HSPB1|0.3837;CTSH|0.4699;PARK7|5.9704;YWHAZ|2.704;SHISA5|0.2704;SLC9A3R1|3.8726;LAMP1|2.6062;SOD1|5.7016;S100A8|0.1644	13	712	185	38520	http://www.ebi.ac.uk/QuickGO/GTerm?id=GO:0097190	[]
2	2	metabolic process	GO:0008152	4.55e-05	0.000453	-113.14	-10.99	4.84136	-12.6834	VWF|1.3804;UBA1|0.0107;SEMG1|41.6869;CST6|0.0614;CTSB|0.3105;CD14|0.8241;HBB|1.6749;HSP90AA1|2.466;MME|2.2284;CSTA|0.177;PKM|4.9659;CPQ|0.3565;GAA|0.6026;ALDOA|2.9923;GSN|0.0718;LUM|0.2421;P06314|0.0809;PDCD6IP|2.0701;MSN|3.9084;MYLK|0.7516;MDH1|2.7542;MGAM|3.5318;SERPINC1|0.6026;DPP4|2.3335;RNASE1|0.8166;PRDX6|8.9536;S100A9|0.0619;PPIC|9.6383;MAN2B2|0.3048;DDT|4.5709;OLFM4|10.7647;CNDP2|2.6303;P…	152	26672	185	38520	http://www.ebi.ac.uk/QuickGO/GTerm?id=GO:0008152	[]
5	5	positive regulation of protein metabolic process	GO:0051247	4.61e-05	0.000457	-15.33	-1.37	4.84136	-12.6834	SEMG1|41.6869;CD14|0.8241;GSN|0.0718;MSN|3.9084;S100A9|0.0619;VTN|0.0809;LTF|26.7917;CTSC|0.3076;ACE|8.2414;HSPB1|0.3837;CTSH|0.4699;RDX|1.5704;SERPINB3|0.0377;PARK7|5.9704;EGF|0.7943;TFF2|0.2655;FN1|2.3988;SOD1|5.7016;IL1RN|0.2729;APOE|0.5105;S100A8|0.1644;C3|1.3804	22	1772	185	38520	http://www.ebi.ac.uk/QuickGO/GTerm?id=GO:0051247	[]
4	4	negative regulation of immune response	GO:0050777	4.68e-05	0.000463	-1.41	0	4.84136	-12.6834	OLFM4|10.7647;PGLYRP1|0.1722;PGLYRP2|0.3945;SPINK5|0.1406;APOA1|10.8643;A2M|22.9087	6	133	185	38520	http://www.ebi.ac.uk/QuickGO/GTerm?id=GO:0050777	[]
4	4	regulation of cellular localization	GO:0060341	4.72e-05	0.000466	11.38	1.25	4.84136	-12.6834	PDZK1|11.695;CD14|0.8241;GSN|0.0718;PDCD6IP|2.0701;MSN|3.9084;LCP1|3.5645;RDX|1.5704;PARK7|5.9704;YWHAZ|2.704;EGF|0.7943;CRYAB|0.2333;CDH1|0.8091;FN1|2.3988;SLC9A3R1|3.8726;PRDX1|2.9107;LAMP1|2.6062;SPINK1|0.0113;IL1RN|0.2729;APOA1|10.8643	19	1396	185	38520	http://www.ebi.ac.uk/QuickGO/GTerm?id=GO:0060341	[]
8	5,6,8	high-density lipoprotein particle remodeling	GO:0034375	4.75e-05	0.000468	0.29	0.16	4.84136	-12.6834	APOE|0.5105;APOA1|10.8643;APOA4|3.2211	3	15	185	38520	http://www.ebi.ac.uk/QuickGO/GTerm?id=GO:0034375	[]
5	5	cellular response to inorganic substance	GO:0071241	5.3e-05	0.00052	1.31	0.26	4.84136	-12.6834	GSN|0.0718;AQP1|0.0133;KRT10|5.3951;AOC1|2.0701;CDH1|0.8091;SOD1|5.7016	6	136	185	38520	http://www.ebi.ac.uk/QuickGO/GTerm?id=GO:0071241	[]
6	6	neutral lipid catabolic process	GO:0046461	5.49e-05	0.000534	0.28	0.16	4.84136	-12.6834	FABP5|0.0296;APOE|0.5105;APOA1|10.8643;APOA4|3.2211	4	43	185	38520	http://www.ebi.ac.uk/QuickGO/GTerm?id=GO:0046461	[]
7	7	acylglycerol catabolic process	GO:0046464	5.49e-05	0.000534	0.28	0.16	4.84136	-12.6834	FABP5|0.0296;APOE|0.5105;APOA1|10.8643;APOA4|3.2211	4	43	185	38520	http://www.ebi.ac.uk/QuickGO/GTerm?id=GO:0046464	[]
6	6	beta-amyloid metabolic process	GO:0050435	5.49e-05	0.000534	1.79	0.31	4.84136	-12.6834	MME|2.2284;ACE|8.2414;APEH|1.7061;APOE|0.5105	4	43	185	38520	http://www.ebi.ac.uk/QuickGO/GTerm?id=GO:0050435	[]
6	5,6	glutathione metabolic process	GO:0006749	5.5e-05	0.000534	3.37	0.47	4.84136	-12.6834	CNDP2|2.6303;SOD1|5.7016;GLO1|4.4463;GGT1|5.0582;IDH1|6.9183	5	84	185	38520	http://www.ebi.ac.uk/QuickGO/GTerm?id=GO:0006749	[]
5	4,5	signal transduction	GO:0007165	5.74e-05	0.000556	-55.45	-5.32	4.84136	-12.6834	LASP1|0.0281;CTSB|0.3105;CD14|0.8241;HSP90AA1|2.466;GSN|0.0718;P06314|0.0809;LRG1|0.8017;MYLK|0.7516;S100A9|0.0619;OLFM4|10.7647;PGLYRP1|0.1722;VTN|0.0809;LTF|26.7917;LCP1|3.5645;PGLYRP2|0.3945;AHSG|0.1432;CTSC|0.3076;BCAM|0.4875;VCAM1|9.4624;HSPB1|0.3837;CTSH|0.4699;SERPINB3|0.0377;KLK3|65.4636;FOLR1|0.2188;PARK7|5.9704;YWHAZ|2.704;COL15A1|0.1556;EGF|0.7943;TFF2|0.2655;CRYAB|0.2333;CDH1|0.8091;C…	68	9195	185	38520	http://www.ebi.ac.uk/QuickGO/GTerm?id=GO:0007165	[]
7	5,6,7	positive regulation of phagocytosis	GO:0050766	6.02e-05	0.000579	-2.05	-0.07	4.84136	-12.6834	AHSG|0.1432;LMAN2|0.2466;C3|1.3804;C4A|0.3467	4	44	185	38520	http://www.ebi.ac.uk/QuickGO/GTerm?id=GO:0050766	[]
7	5,7	positive regulation of wound healing	GO:0090303	6.02e-05	0.000579	-2.83	-0.14	4.84136	-12.6834	MYLK|0.7516;S100A9|0.0619;VTN|0.0809;PLG|0.3908	4	44	185	38520	http://www.ebi.ac.uk/QuickGO/GTerm?id=GO:0090303	[]
7	4,6,7	immune response-regulating cell surface receptor signaling pathway involved in phagocytosis	GO:0002433	6.05e-05	0.00058	-6.99	-0.55	4.84136	-12.6834	HSP90AA1|2.466;P06314|0.0809;P01594|0.0643;IGHG3|0.2992;P01614|0.7727;P01616|0.0145;P01617|0.0146	7	203	185	38520	http://www.ebi.ac.uk/QuickGO/GTerm?id=GO:0002433	[]
9	5,7,9	Fc-gamma receptor signaling pathway involved in phagocytosis	GO:0038096	6.05e-05	0.00058	-6.99	-0.55	4.84136	-12.6834	HSP90AA1|2.466;P06314|0.0809;P01594|0.0643;IGHG3|0.2992;P01614|0.7727;P01616|0.0145;P01617|0.0146	7	203	185	38520	http://www.ebi.ac.uk/QuickGO/GTerm?id=GO:0038096	[]
6	5,6	positive regulation of cellular protein metabolic process	GO:0032270	6.2e-05	0.000592	-14.91	-1.33	4.84136	-12.6834	SEMG1|41.6869;CD14|0.8241;GSN|0.0718;MSN|3.9084;S100A9|0.0619;VTN|0.0809;LTF|26.7917;CTSC|0.3076;ACE|8.2414;CTSH|0.4699;RDX|1.5704;SERPINB3|0.0377;PARK7|5.9704;EGF|0.7943;TFF2|0.2655;FN1|2.3988;SOD1|5.7016;IL1RN|0.2729;APOE|0.5105;S100A8|0.1644;C3|1.3804	21	1678	185	38520	http://www.ebi.ac.uk/QuickGO/GTerm?id=GO:0032270	[]
7	7	cholesterol metabolic process	GO:0008203	6.23e-05	0.000594	4.92	0.62	4.84136	-12.6834	CUBN|0.1067;CAT|22.4905;SOD1|5.7016;APOE|0.5105;APOA1|10.8643;APOA4|3.2211	6	140	185	38520	http://www.ebi.ac.uk/QuickGO/GTerm?id=GO:0008203	[]
8	8	Fc-gamma receptor signaling pathway	GO:0038094	6.24e-05	0.000594	-6.99	-0.55	4.84136	-12.6834	HSP90AA1|2.466;P06314|0.0809;P01594|0.0643;IGHG3|0.2992;P01614|0.7727;P01616|0.0145;P01617|0.0146	7	204	185	38520	http://www.ebi.ac.uk/QuickGO/GTerm?id=GO:0038094	[]
4	4	kidney development	GO:0001822	6.3e-05	0.000597	-0.26	0.11	4.84136	-12.6834	MME|2.2284;ACE|8.2414;CTSH|0.4699;AQP1|0.0133;NID1|0.5058;FBN1|0.1585;CA2|8.7096;CAT|22.4905	8	277	185	38520	http://www.ebi.ac.uk/QuickGO/GTerm?id=GO:0001822	[]
7	6,7	peptide transport	GO:0015833	6.41e-05	0.000606	-7.66	-0.62	4.84136	-12.6834	S100A9|0.0619;AQP1|0.0133;SLC9A3R1|3.8726;PRDX1|2.9107;PTPRN|0.7047;CA2|8.7096;IL1RN|0.2729;S100A8|0.1644;MMP7|0.0817	9	358	185	38520	http://www.ebi.ac.uk/QuickGO/GTerm?id=GO:0015833	[]
5	4,5	negative regulation of defense response	GO:0031348	6.48e-05	0.000611	-4.25	-0.28	4.84136	-12.6834	SERPINC1|0.6026;PGLYRP1|0.1722;TFF2|0.2655;APOE|0.5105;APOA1|10.8643;A2M|22.9087	6	141	185	38520	http://www.ebi.ac.uk/QuickGO/GTerm?id=GO:0031348	[]
6	4,6	response to fungus	GO:0009620	6.58e-05	0.000618	-0.13	0.12	4.84136	-12.6834	S100A9|0.0619;LTF|26.7917;DCD|4.9204;S100A8|0.1644	4	45	185	38520	http://www.ebi.ac.uk/QuickGO/GTerm?id=GO:0009620	[]
5	5	nitrogen compound transport	GO:0071705	6.58e-05	0.000618	-12.35	-1.08	4.84136	-12.6834	PDZK1|11.695;HBB|1.6749;S100A9|0.0619;AQP1|0.0133;FOLR1|0.2188;PARK7|5.9704;CUBN|0.1067;SLC9A3R1|3.8726;PRDX1|2.9107;PTPRN|0.7047;CA2|8.7096;SERPINA7|0.2188;IL1RN|0.2729;S100A8|0.1644;MMP7|0.0817;SLC3A2|0.4742	16	1071	185	38520	http://www.ebi.ac.uk/QuickGO/GTerm?id=GO:0071705	[]
7	7	mucopolysaccharide metabolic process	GO:1903510	6.74e-05	0.000631	-2.21	-0.08	4.84136	-12.6834	LUM|0.2421;BGN|0.1995;EGF|0.7943;GLB1|0.52;GNS|0.4246;HEXB|1.3804	6	142	185	38520	http://www.ebi.ac.uk/QuickGO/GTerm?id=GO:1903510	[]
5	5	methylglyoxal metabolic process	GO:0009438	6.86e-05	0.000636	1.42	0.28	4.84136	-12.6834	PARK7|5.9704;GLO1|4.4463	2	3	185	38520	http://www.ebi.ac.uk/QuickGO/GTerm?id=GO:0009438	[]
7	5,6,7	maltose metabolic process	GO:0000023	6.86e-05	0.000636	-0.33	0.1	4.84136	-12.6834	GAA|0.6026;MGAM|3.5318	2	3	185	38520	http://www.ebi.ac.uk/QuickGO/GTerm?id=GO:0000023	[]
6	5,6	nitric oxide transport	GO:0030185	6.86e-05	0.000636	1.65	0.3	4.84136	-12.6834	HBB|1.6749;AQP1|0.0133	2	3	185	38520	http://www.ebi.ac.uk/QuickGO/GTerm?id=GO:0030185	[]
7	6,7	regulation of fibril organization	GO:1902903	6.86e-05	0.000636	1.16	0.25	4.84136	-12.6834	PARK7|5.9704;HSPA8|2.3988	2	3	185	38520	http://www.ebi.ac.uk/QuickGO/GTerm?id=GO:1902903	[]
3	3	single organism signaling	GO:0044700	7.29e-05	0.000674	-59	-5.66	4.84136	-12.6834	PCDH1|0.4285;LASP1|0.0281;CTSB|0.3105;CD14|0.8241;HSP90AA1|2.466;GSN|0.0718;P06314|0.0809;LRG1|0.8017;MYLK|0.7516;S100A9|0.0619;OLFM4|10.7647;PGLYRP1|0.1722;VTN|0.0809;LTF|26.7917;LCP1|3.5645;PGLYRP2|0.3945;AHSG|0.1432;CTSC|0.3076;BCAM|0.4875;VCAM1|9.4624;HSPB1|0.3837;CTSH|0.4699;AQP1|0.0133;SERPINB3|0.0377;KLK3|65.4636;FOLR1|0.2188;PARK7|5.9704;YWHAZ|2.704;HSPA8|2.3988;COL15A1|0.1556;EGF|0.7943;…	72	9995	185	38520	http://www.ebi.ac.uk/QuickGO/GTerm?id=GO:0044700	[]
7	7	triglyceride metabolic process	GO:0006641	7.57e-05	0.000698	4.86	0.61	4.84136	-12.6834	FABP5|0.0296;CAT|22.4905;APOE|0.5105;APOA1|10.8643;C3|1.3804;APOA4|3.2211	6	145	185	38520	http://www.ebi.ac.uk/QuickGO/GTerm?id=GO:0006641	[]
5	5	response to zinc ion	GO:0010043	7.82e-05	0.000719	-3.24	-0.18	4.84136	-12.6834	S100A9|0.0619;GGH|0.492;CA2|8.7096;S100A8|0.1644	4	47	185	38520	http://www.ebi.ac.uk/QuickGO/GTerm?id=GO:0010043	[]
4	4	positive regulation of response to wounding	GO:1903036	7.86e-05	0.000721	-3.76	-0.23	4.84136	-12.6834	MYLK|0.7516;S100A9|0.0619;VTN|0.0809;S100A8|0.1644;C3|1.3804;PLG|0.3908	6	146	185	38520	http://www.ebi.ac.uk/QuickGO/GTerm?id=GO:1903036	[]
8	6,8	Fc receptor mediated stimulatory signaling pathway	GO:0002431	7.94e-05	0.000727	-6.99	-0.55	4.84136	-12.6834	HSP90AA1|2.466;P06314|0.0809;P01594|0.0643;IGHG3|0.2992;P01614|0.7727;P01616|0.0145;P01617|0.0146	7	212	185	38520	http://www.ebi.ac.uk/QuickGO/GTerm?id=GO:0002431	[]
3	3	leukocyte migration	GO:0050900	8.07e-05	0.000736	3.08	0.44	4.84136	-12.6834	CD177|2.1878;MSN|3.9084;S100A9|0.0619;OLFM4|10.7647;VCAM1|9.4624;SPP1|0.1738;FN1|2.3988;S100A8|0.1644;SLC3A2|0.4742	9	369	185	38520	http://www.ebi.ac.uk/QuickGO/GTerm?id=GO:0050900	[]
2	2	signaling	GO:0023052	8.08e-05	0.000736	-59	-5.66	4.84136	-12.6834	PCDH1|0.4285;LASP1|0.0281;CTSB|0.3105;CD14|0.8241;HSP90AA1|2.466;GSN|0.0718;P06314|0.0809;LRG1|0.8017;MYLK|0.7516;S100A9|0.0619;OLFM4|10.7647;PGLYRP1|0.1722;VTN|0.0809;LTF|26.7917;LCP1|3.5645;PGLYRP2|0.3945;AHSG|0.1432;CTSC|0.3076;BCAM|0.4875;VCAM1|9.4624;HSPB1|0.3837;CTSH|0.4699;AQP1|0.0133;SERPINB3|0.0377;KLK3|65.4636;FOLR1|0.2188;PARK7|5.9704;YWHAZ|2.704;HSPA8|2.3988;COL15A1|0.1556;EGF|0.7943;…	72	10025	185	38520	http://www.ebi.ac.uk/QuickGO/GTerm?id=GO:0023052	[]
4	4	cellular response to endogenous stimulus	GO:0071495	8.15e-05	0.00074	-13.16	-1.16	4.84136	-12.6834	CTSB|0.3105;LRG1|0.8017;MSN|3.9084;COL6A1|0.3162;AHSG|0.1432;CTSH|0.4699;AQP1|0.0133;FOLR1|0.2188;EGF|0.7943;AOC1|2.0701;CDH1|0.8091;CDH13|0.1706;FBN1|0.1585;VASN|0.0982;IGFBP2|0.0698;SOD1|5.7016;IL1RN|0.2729;APOA1|10.8643;PRCP|0.0685	19	1455	185	38520	http://www.ebi.ac.uk/QuickGO/GTerm?id=GO:0071495	[]
4	4	organic hydroxy compound metabolic process	GO:1901615	8.19e-05	0.000742	10.28	1.15	4.84136	-12.6834	CPQ|0.3565;DDT|4.5709;FABP5|0.0296;PARK7|5.9704;CUBN|0.1067;LRP2|0.1459;SORD|13.1826;CAT|22.4905;SOD1|5.7016;APOE|0.5105;APOA1|10.8643;APOA4|3.2211	12	652	185	38520	http://www.ebi.ac.uk/QuickGO/GTerm?id=GO:1901615	[]
4	4	cellular component assembly	GO:0022607	8.24e-05	0.000745	20.68	2.17	4.84136	-12.6834	VWF|1.3804;SEMG1|41.6869;HBB|1.6749;HSP90AA1|2.466;ALDOA|2.9923;GSN|0.0718;PDCD6IP|2.0701;MSN|3.9084;MYLK|0.7516;OLFM4|10.7647;LCP1|3.5645;COL6A1|0.3162;HBA1|1.5996;ACE|8.2414;AQP1|0.0133;AHNAK|0.0643;RDX|1.5704;PARK7|5.9704;YWHAZ|2.704;KRT5|0.3802;EGF|0.7943;CRYAB|0.2333;CDH1|0.8091;CDH13|0.1706;FN1|2.3988;SLC9A3R1|3.8726;HLA-DRA|1.406;CAT|22.4905;APOE|0.5105;ANXA5|14.0605;APOA1|10.8643;CDH11|0.…	33	3411	185	38520	http://www.ebi.ac.uk/QuickGO/GTerm?id=GO:0022607	[]
4	4	regulation of anatomical structure size	GO:0090066	8.55e-05	0.00077	9.11	1.03	4.84136	-12.6834	HBB|1.6749;GSN|0.0718;MSN|3.9084;ACE|8.2414;AQP1|0.0133;RDX|1.5704;SPP1|0.1738;FN1|2.3988;SLC9A3R1|3.8726;SOD1|5.7016;APOE|0.5105;SH3BGRL3|0.0409	12	655	185	38520	http://www.ebi.ac.uk/QuickGO/GTerm?id=GO:0090066	[]
5	5	regulation of cellular catabolic process	GO:0031329	8.57e-05	0.00077	10.31	1.15	4.84136	-12.6834	MSN|3.9084;MYLK|0.7516;MDH1|2.7542;CTSC|0.3076;RDX|1.5704;PARK7|5.9704;HP|34.3558;EGF|0.7943;TIMP1|18.197;APOE|0.5105;ANXA5|14.0605;APOA1|10.8643;KRT6A|0.1127;APOA4|3.2211;IDH1|6.9183	15	980	185	38520	http://www.ebi.ac.uk/QuickGO/GTerm?id=GO:0031329	[]
3	3	negative regulation of immune system process	GO:0002683	8.58e-05	0.00077	2.6	0.39	4.84136	-12.6834	OLFM4|10.7647;PGLYRP1|0.1722;LTF|26.7917;PGLYRP2|0.3945;SPINK5|0.1406;TFF2|0.2655;APOA1|10.8643;A2M|22.9087;SCGB1A1|8.5507	9	372	185	38520	http://www.ebi.ac.uk/QuickGO/GTerm?id=GO:0002683	[]
5	4,5	negative regulation of cytokine production	GO:0001818	8.93e-05	0.000799	1.61	0.29	4.84136	-12.6834	PGLYRP1|0.1722;LTF|26.7917;PGLYRP2|0.3945;PRG4|0.3631;FN1|2.3988;APOA1|10.8643;SCGB1A1|8.5507	7	216	185	38520	http://www.ebi.ac.uk/QuickGO/GTerm?id=GO:0001818	[]
7	7	response to glucocorticoid	GO:0051384	9.13e-05	0.000815	-5.33	-0.39	4.84136	-12.6834	AQP1|0.0133;SERPINA7|0.2188;IGFBP2|0.0698;IL1RN|0.2729;C3|1.3804;SCGB1A1|8.5507	6	150	185	38520	http://www.ebi.ac.uk/QuickGO/GTerm?id=GO:0051384	[]
5	4,5	cell development	GO:0048468	9.23e-05	0.000822	-17.62	-1.6	4.84136	-12.6834	HSP90AA1|2.466;GSN|0.0718;MSN|3.9084;OLFM4|10.7647;LTF|26.7917;COL6A1|0.3162;RDX|1.5704;SERPINB3|0.0377;FOLR1|0.2188;HSPA8|2.3988;CRYAB|0.2333;CDH1|0.8091;SPP1|0.1738;FN1|2.3988;SLC9A3R1|3.8726;VASN|0.0982;SOD1|5.7016;APOE|0.5105;APOA1|10.8643;HEXB|1.3804;PI16|0.182;CDH11|0.3105;APOA4|3.2211;NEU1|0.597;NAGLU|0.5546;KLK6|0.0112	26	2407	185	38520	http://www.ebi.ac.uk/QuickGO/GTerm?id=GO:0048468	[]
5	5	renal system development	GO:0072001	9.31e-05	0.000827	-0.26	0.11	4.84136	-12.6834	MME|2.2284;ACE|8.2414;CTSH|0.4699;AQP1|0.0133;NID1|0.5058;FBN1|0.1585;CA2|8.7096;CAT|22.4905	8	293	185	38520	http://www.ebi.ac.uk/QuickGO/GTerm?id=GO:0072001	[]
5	5	response to vitamin	GO:0033273	9.4e-05	0.000834	-4.58	-0.31	4.84136	-12.6834	GSN|0.0718;FOLR1|0.2188;SPP1|0.1738;CAT|22.4905;SERPINA7|0.2188	5	94	185	38520	http://www.ebi.ac.uk/QuickGO/GTerm?id=GO:0033273	[]
6	5,6	regulation of angiogenesis	GO:0045765	9.46e-05	0.000836	-5.52	-0.41	4.84136	-12.6834	LRG1|0.8017;HSPB1|0.3837;CTSH|0.4699;AQP1|0.0133;KLK3|65.4636;SPINK5|0.1406;C3|1.3804	7	218	185	38520	http://www.ebi.ac.uk/QuickGO/GTerm?id=GO:0045765	[]
4	4	organ morphogenesis	GO:0009887	9.48e-05	0.000836	-6.58	-0.51	4.84136	-12.6834	GAA|0.6026;MSN|3.9084;MYLK|0.7516;LTF|26.7917;CTSH|0.4699;AQP1|0.0133;FOLR1|0.2188;KRT13|0.0373;PAPPA2|8.8716;SLC9A3R1|3.8726;FBN1|0.1585;CA2|8.7096;SOD1|5.7016;CPE|21.0863;NAGLU|0.5546	15	989	185	38520	http://www.ebi.ac.uk/QuickGO/GTerm?id=GO:0009887	[]
5	5	macromolecular complex assembly	GO:0065003	9.57e-05	0.000843	14.95	1.6	4.84136	-12.6834	VWF|1.3804;SEMG1|41.6869;HBB|1.6749;HSP90AA1|2.466;ALDOA|2.9923;GSN|0.0718;PDCD6IP|2.0701;OLFM4|10.7647;LCP1|3.5645;COL6A1|0.3162;HBA1|1.5996;AHNAK|0.0643;RDX|1.5704;PARK7|5.9704;EGF|0.7943;CRYAB|0.2333;FN1|2.3988;SLC9A3R1|3.8726;HLA-DRA|1.406;CAT|22.4905;APOE|0.5105;ANXA5|14.0605;APOA1|10.8643;APOA4|3.2211	24	2134	185	38520	http://www.ebi.ac.uk/QuickGO/GTerm?id=GO:0065003	[]
5	5	organic substance transport	GO:0071702	9.68e-05	0.00085	12.49	1.36	4.84136	-12.6834	PDZK1|11.695;CD14|0.8241;HBB|1.6749;HSP90AA1|2.466;PDCD6IP|2.0701;S100A9|0.0619;LCP1|3.5645;HBA1|1.5996;ACE|8.2414;AQP1|0.0133;SERPINA5|0.0698;FOLR1|0.2188;FABP5|0.0296;PARK7|5.9704;YWHAZ|2.704;CUBN|0.1067;LMAN2|0.2466;EGF|0.7943;CTSA|0.4571;CDH1|0.8091;FN1|2.3988;CD63|5.7016;SLC9A3R1|3.8726;PRDX1|2.9107;PTPRN|0.7047;CA2|8.7096;SERPINA7|0.2188;CA1|52.9663;IL1RN|0.2729;APOE|0.5105;APOA1|10.8643;S1…	37	4056	185	38520	http://www.ebi.ac.uk/QuickGO/GTerm?id=GO:0071702	[]
7	7	endothelial cell migration	GO:0043542	9.82e-05	0.00086	-4.27	-0.28	4.84136	-12.6834	DPP4|2.3335;HSPB1|0.3837;CDH13|0.1706;APOE|0.5105;SH3BGRL3|0.0409;APOA1|10.8643	6	152	185	38520	http://www.ebi.ac.uk/QuickGO/GTerm?id=GO:0043542	[]
6	6	fibril organization	GO:0097435	9.98e-05	0.000868	1.14	0.25	4.84136	-12.6834	GSN|0.0718;PARK7|5.9704;HSPA8|2.3988	3	19	185	38520	http://www.ebi.ac.uk/QuickGO/GTerm?id=GO:0097435	[]
7	4,5,7	negative regulation of hemostasis	GO:1900047	9.98e-05	0.000868	-2.94	-0.15	4.84136	-12.6834	VTN|0.0809;APOE|0.5105;ANXA5|14.0605;PLG|0.3908	4	50	185	38520	http://www.ebi.ac.uk/QuickGO/GTerm?id=GO:1900047	[]
8	5,6,7,8	negative regulation of blood coagulation	GO:0030195	9.98e-05	0.000868	-2.94	-0.15	4.84136	-12.6834	VTN|0.0809;APOE|0.5105;ANXA5|14.0605;PLG|0.3908	4	50	185	38520	http://www.ebi.ac.uk/QuickGO/GTerm?id=GO:0030195	[]
6	6	acylglycerol metabolic process	GO:0006639	0.000102	0.000883	4.86	0.61	4.84136	-12.6834	FABP5|0.0296;CAT|22.4905;APOE|0.5105;APOA1|10.8643;C3|1.3804;APOA4|3.2211	6	153	185	38520	http://www.ebi.ac.uk/QuickGO/GTerm?id=GO:0006639	[]
5	5	digestive system process	GO:0022600	0.000104	0.000897	-1.54	-0.02	4.84136	-12.6834	AQP1|0.0133;SERPINA3|0.3436;TFF2|0.2655;APOA1|10.8643;APOA4|3.2211	5	96	185	38520	http://www.ebi.ac.uk/QuickGO/GTerm?id=GO:0022600	[]
6	5,6	negative regulation of inflammatory response	GO:0050728	0.000104	0.000897	-2.89	-0.15	4.84136	-12.6834	SERPINC1|0.6026;PGLYRP1|0.1722;TFF2|0.2655;APOE|0.5105;APOA1|10.8643	5	96	185	38520	http://www.ebi.ac.uk/QuickGO/GTerm?id=GO:0050728	[]
3	3	positive regulation of multicellular organismal process	GO:0051240	0.000105	0.000907	-12.25	-1.07	4.84136	-12.6834	CD14|0.8241;LUM|0.2421;LRG1|0.8017;S100A9|0.0619;LTF|26.7917;HSPB1|0.3837;CTSH|0.4699;AQP1|0.0133;SERPINB3|0.0377;PARK7|5.9704;EGF|0.7943;SPP1|0.1738;FN1|2.3988;CA2|8.7096;SOD1|5.7016;APOE|0.5105;C3|1.3804;PLG|0.3908;NEU1|0.597	19	1484	185	38520	http://www.ebi.ac.uk/QuickGO/GTerm?id=GO:0051240	[]
5	5	neutral lipid metabolic process	GO:0006638	0.000105	0.000907	4.86	0.61	4.84136	-12.6834	FABP5|0.0296;CAT|22.4905;APOE|0.5105;APOA1|10.8643;C3|1.3804;APOA4|3.2211	6	154	185	38520	http://www.ebi.ac.uk/QuickGO/GTerm?id=GO:0006638	[]
5	4,5	embryo implantation	GO:0007566	0.000108	0.000924	3.71	0.5	4.84136	-12.6834	SPP1|0.1738;TIMP1|18.197;SOD1|5.7016;SCGB1A1|8.5507	4	51	185	38520	http://www.ebi.ac.uk/QuickGO/GTerm?id=GO:0007566	[]
5	5	alcohol metabolic process	GO:0006066	0.000108	0.000924	9.18	1.04	4.84136	-12.6834	FABP5|0.0296;PARK7|5.9704;CUBN|0.1067;LRP2|0.1459;SORD|13.1826;CAT|22.4905;SOD1|5.7016;APOE|0.5105;APOA1|10.8643;APOA4|3.2211	10	474	185	38520	http://www.ebi.ac.uk/QuickGO/GTerm?id=GO:0006066	[]
6	6	glycerolipid catabolic process	GO:0046503	0.000116	0.000992	0.28	0.16	4.84136	-12.6834	FABP5|0.0296;APOE|0.5105;APOA1|10.8643;APOA4|3.2211	4	52	185	38520	http://www.ebi.ac.uk/QuickGO/GTerm?id=GO:0046503	[]
9	8,9	cholesterol efflux	GO:0033344	0.000116	0.000992	-1.15	0.02	4.84136	-12.6834	EGF|0.7943;APOE|0.5105;APOA1|10.8643;APOA4|3.2211	4	52	185	38520	http://www.ebi.ac.uk/QuickGO/GTerm?id=GO:0033344	[]
5	5	lipid digestion	GO:0044241	0.000117	0.000994	1.88	0.32	4.84136	-12.6834	AQP1|0.0133;APOA1|10.8643;APOA4|3.2211	3	20	185	38520	http://www.ebi.ac.uk/QuickGO/GTerm?id=GO:0044241	[]
7	6,7	regulation of T cell activation	GO:0050863	0.000117	0.000994	6.33	0.76	4.84136	-12.6834	GSN|0.0718;DPP4|2.3335;VCAM1|9.4624;SPINK5|0.1406;HLA-DRA|1.406;IGFBP2|0.0698;SOD1|5.7016;SCGB1A1|8.5507	8	303	185	38520	http://www.ebi.ac.uk/QuickGO/GTerm?id=GO:0050863	[]
6	6	response to corticosteroid	GO:0031960	0.000121	0.00102	-5.33	-0.39	4.84136	-12.6834	AQP1|0.0133;SERPINA7|0.2188;IGFBP2|0.0698;IL1RN|0.2729;C3|1.3804;SCGB1A1|8.5507	6	158	185	38520	http://www.ebi.ac.uk/QuickGO/GTerm?id=GO:0031960	[]
8	6,7,8	regulation of intrinsic apoptotic signaling pathway	GO:2001242	0.000121	0.00102	0.29	0.16	4.84136	-12.6834	S100A9|0.0619;HSPB1|0.3837;PARK7|5.9704;SLC9A3R1|3.8726;SOD1|5.7016;S100A8|0.1644	6	158	185	38520	http://www.ebi.ac.uk/QuickGO/GTerm?id=GO:2001242	[]
3	3	cellular metabolic process	GO:0044237	0.000123	0.00103	-91.49	-8.86	4.84136	-12.6834	UBA1|0.0107;SEMG1|41.6869;CST6|0.0614;CTSB|0.3105;CD14|0.8241;HBB|1.6749;HSP90AA1|2.466;MME|2.2284;CSTA|0.177;PKM|4.9659;CPQ|0.3565;GAA|0.6026;ALDOA|2.9923;GSN|0.0718;LUM|0.2421;PDCD6IP|2.0701;MSN|3.9084;MYLK|0.7516;MDH1|2.7542;MGAM|3.5318;SERPINC1|0.6026;RNASE1|0.8166;PRDX6|8.9536;S100A9|0.0619;PPIC|9.6383;MAN2B2|0.3048;DDT|4.5709;CNDP2|2.6303;VTN|0.0809;LTF|26.7917;SERPINB13|0.3373;HBA1|1.5996;…	124	20607	185	38520	http://www.ebi.ac.uk/QuickGO/GTerm?id=GO:0044237	[]
6	6	alcohol biosynthetic process	GO:0046165	0.00013	0.00109	4.9	0.62	4.84136	-12.6834	FABP5|0.0296;PARK7|5.9704;SOD1|5.7016;APOE|0.5105;APOA1|10.8643;APOA4|3.2211	6	160	185	38520	http://www.ebi.ac.uk/QuickGO/GTerm?id=GO:0046165	[]
8	7,8	positive regulation of cysteine-type endopeptidase activity involved in apoptotic process	GO:0043280	0.00013	0.00109	-4.06	-0.26	4.84136	-12.6834	CD14|0.8241;GSN|0.0718;S100A9|0.0619;CTSC|0.3076;CTSH|0.4699;S100A8|0.1644	6	160	185	38520	http://www.ebi.ac.uk/QuickGO/GTerm?id=GO:0043280	[]
6	6	sterol metabolic process	GO:0016125	0.000135	0.0011	4.92	0.62	4.84136	-12.6834	CUBN|0.1067;CAT|22.4905;SOD1|5.7016;APOE|0.5105;APOA1|10.8643;APOA4|3.2211	6	161	185	38520	http://www.ebi.ac.uk/QuickGO/GTerm?id=GO:0016125	[]
8	8	cholesterol biosynthetic process	GO:0006695	0.000135	0.0011	2.59	0.39	4.84136	-12.6834	SOD1|5.7016;APOE|0.5105;APOA1|10.8643;APOA4|3.2211	4	54	185	38520	http://www.ebi.ac.uk/QuickGO/GTerm?id=GO:0006695	[]
6	5,6	regulation of cellular response to oxidative stress	GO:1900407	0.000135	0.0011	3.48	0.48	4.84136	-12.6834	HSPB1|0.3837;PARK7|5.9704;HP|34.3558;SOD1|5.7016	4	54	185	38520	http://www.ebi.ac.uk/QuickGO/GTerm?id=GO:1900407	[]
7	4,5,7	plasma lipoprotein particle assembly	GO:0034377	0.000136	0.0011	0.29	0.16	4.84136	-12.6834	APOE|0.5105;APOA1|10.8643;APOA4|3.2211	3	21	185	38520	http://www.ebi.ac.uk/QuickGO/GTerm?id=GO:0034377	[]
8	5,6,7,8	positive regulation of G-protein coupled receptor protein signaling pathway	GO:0045745	0.000136	0.0011	1.95	0.33	4.84136	-12.6834	ACPP|64.2688;C3|1.3804;KLK6|0.0112	3	21	185	38520	http://www.ebi.ac.uk/QuickGO/GTerm?id=GO:0045745	[]
6	5,6	muscle cell cellular homeostasis	GO:0046716	0.000136	0.0011	0.22	0.16	4.84136	-12.6834	GAA|0.6026;ALDOA|2.9923;SOD1|5.7016	3	21	185	38520	http://www.ebi.ac.uk/QuickGO/GTerm?id=GO:0046716	[]
8	7,8	phospholipid efflux	GO:0033700	0.000136	0.0011	0.29	0.16	4.84136	-12.6834	APOE|0.5105;APOA1|10.8643;APOA4|3.2211	3	21	185	38520	http://www.ebi.ac.uk/QuickGO/GTerm?id=GO:0033700	[]
4	4	antimicrobial peptide production	GO:0002775	0.000137	0.0011	-0.73	0.06	4.84136	-12.6834	KLK3|65.4636;MMP7|0.0817	2	4	185	38520	http://www.ebi.ac.uk/QuickGO/GTerm?id=GO:0002775	[]
10	9,10	Cdc42 protein signal transduction	GO:0032488	0.000137	0.0011	-0.74	0.06	4.84136	-12.6834	APOE|0.5105;APOA1|10.8643	2	4	185	38520	http://www.ebi.ac.uk/QuickGO/GTerm?id=GO:0032488	[]
11	9,10,11	regulation of Cdc42 protein signal transduction	GO:0032489	0.000137	0.0011	-0.74	0.06	4.84136	-12.6834	APOE|0.5105;APOA1|10.8643	2	4	185	38520	http://www.ebi.ac.uk/QuickGO/GTerm?id=GO:0032489	[]
10	8,9,10	regulation of keratinocyte apoptotic process	GO:1902172	0.000137	0.0011	-1.62	-0.02	4.84136	-12.6834	GSN|0.0718;SERPINB13|0.3373	2	4	185	38520	http://www.ebi.ac.uk/QuickGO/GTerm?id=GO:1902172	[]
7	4,5,6,7	natural killer cell differentiation involved in immune response	GO:0002325	0.000137	0.0011	-1.17	0.02	4.84136	-12.6834	PGLYRP1|0.1722;PGLYRP2|0.3945	2	4	185	38520	http://www.ebi.ac.uk/QuickGO/GTerm?id=GO:0002325	[]
8	5,8	negative regulation of natural killer cell differentiation involved in immune response	GO:0032827	0.000137	0.0011	-1.17	0.02	4.84136	-12.6834	PGLYRP1|0.1722;PGLYRP2|0.3945	2	4	185	38520	http://www.ebi.ac.uk/QuickGO/GTerm?id=GO:0032827	[]
5	5	regulation of natural killer cell differentiation involved in immune response	GO:0032826	0.000137	0.0011	-1.17	0.02	4.84136	-12.6834	PGLYRP1|0.1722;PGLYRP2|0.3945	2	4	185	38520	http://www.ebi.ac.uk/QuickGO/GTerm?id=GO:0032826	[]
5	5	antibacterial peptide production	GO:0002778	0.000137	0.0011	-0.73	0.06	4.84136	-12.6834	KLK3|65.4636;MMP7|0.0817	2	4	185	38520	http://www.ebi.ac.uk/QuickGO/GTerm?id=GO:0002778	[]
9	9	keratinocyte apoptotic process	GO:0097283	0.000137	0.0011	-1.62	-0.02	4.84136	-12.6834	GSN|0.0718;SERPINB13|0.3373	2	4	185	38520	http://www.ebi.ac.uk/QuickGO/GTerm?id=GO:0097283	[]
7	7	negative regulation of natural killer cell differentiation	GO:0032824	0.000137	0.0011	-1.17	0.02	4.84136	-12.6834	PGLYRP1|0.1722;PGLYRP2|0.3945	2	4	185	38520	http://www.ebi.ac.uk/QuickGO/GTerm?id=GO:0032824	[]
4	4	lymphocyte activation	GO:0046649	0.000137	0.0011	8.47	0.97	4.84136	-12.6834	GSN|0.0718;DPP4|2.3335;PGLYRP1|0.1722;LCP1|3.5645;PGLYRP2|0.3945;VCAM1|9.4624;SPINK5|0.1406;HLA-DRA|1.406;IGFBP2|0.0698;LAMP1|2.6062;SOD1|5.7016;SCGB1A1|8.5507	12	689	185	38520	http://www.ebi.ac.uk/QuickGO/GTerm?id=GO:0046649	[]
6	5,6	organic hydroxy compound transport	GO:0015850	0.00014	0.00112	6.24	0.75	4.84136	-12.6834	PDZK1|11.695;AQP1|0.0133;PARK7|5.9704;EGF|0.7943;SLC9A3R1|3.8726;APOE|0.5105;APOA1|10.8643;APOA4|3.2211	8	311	185	38520	http://www.ebi.ac.uk/QuickGO/GTerm?id=GO:0015850	[]
6	6	regulation of leukocyte cell-cell adhesion	GO:1903037	0.00014	0.00112	6.33	0.76	4.84136	-12.6834	GSN|0.0718;DPP4|2.3335;VCAM1|9.4624;SPINK5|0.1406;HLA-DRA|1.406;IGFBP2|0.0698;SOD1|5.7016;SCGB1A1|8.5507	8	311	185	38520	http://www.ebi.ac.uk/QuickGO/GTerm?id=GO:1903037	[]
4	4	negative regulation of coagulation	GO:0050819	0.000145	0.00116	-2.94	-0.15	4.84136	-12.6834	VTN|0.0809;APOE|0.5105;ANXA5|14.0605;PLG|0.3908	4	55	185	38520	http://www.ebi.ac.uk/QuickGO/GTerm?id=GO:0050819	[]
5	5	neuron projection regeneration	GO:0031102	0.000145	0.00116	-0.49	0.09	4.84136	-12.6834	SPP1|0.1738;APOE|0.5105;APOA1|10.8643;APOA4|3.2211	4	55	185	38520	http://www.ebi.ac.uk/QuickGO/GTerm?id=GO:0031102	[]
5	5	regulation of vasculature development	GO:1901342	0.000154	0.00123	-5.52	-0.41	4.84136	-12.6834	LRG1|0.8017;HSPB1|0.3837;CTSH|0.4699;AQP1|0.0133;KLK3|65.4636;SPINK5|0.1406;C3|1.3804	7	236	185	38520	http://www.ebi.ac.uk/QuickGO/GTerm?id=GO:1901342	[]
9	8,9	reverse cholesterol transport	GO:0043691	0.000157	0.00125	0.29	0.16	4.84136	-12.6834	APOE|0.5105;APOA1|10.8643;APOA4|3.2211	3	22	185	38520	http://www.ebi.ac.uk/QuickGO/GTerm?id=GO:0043691	[]
6	5,6	protein complex assembly	GO:0006461	0.000158	0.00125	13.11	1.42	4.84136	-12.6834	VWF|1.3804;SEMG1|41.6869;HBB|1.6749;HSP90AA1|2.466;ALDOA|2.9923;GSN|0.0718;PDCD6IP|2.0701;OLFM4|10.7647;LCP1|3.5645;COL6A1|0.3162;HBA1|1.5996;AHNAK|0.0643;RDX|1.5704;PARK7|5.9704;EGF|0.7943;CRYAB|0.2333;FN1|2.3988;SLC9A3R1|3.8726;HLA-DRA|1.406;CAT|22.4905;ANXA5|14.0605	21	1795	185	38520	http://www.ebi.ac.uk/QuickGO/GTerm?id=GO:0006461	[]
4	4	protein complex biogenesis	GO:0070271	0.000158	0.00125	13.11	1.42	4.84136	-12.6834	VWF|1.3804;SEMG1|41.6869;HBB|1.6749;HSP90AA1|2.466;ALDOA|2.9923;GSN|0.0718;PDCD6IP|2.0701;OLFM4|10.7647;LCP1|3.5645;COL6A1|0.3162;HBA1|1.5996;AHNAK|0.0643;RDX|1.5704;PARK7|5.9704;EGF|0.7943;CRYAB|0.2333;FN1|2.3988;SLC9A3R1|3.8726;HLA-DRA|1.406;CAT|22.4905;ANXA5|14.0605	21	1795	185	38520	http://www.ebi.ac.uk/QuickGO/GTerm?id=GO:0070271	[]
7	7	zymogen activation	GO:0031638	0.000164	0.0013	-3.62	-0.22	4.84136	-12.6834	CD14|0.8241;S100A9|0.0619;CTSC|0.3076;CTSH|0.4699;S100A8|0.1644;GGT1|5.0582	6	167	185	38520	http://www.ebi.ac.uk/QuickGO/GTerm?id=GO:0031638	[]
7	7	regulation of protein processing	GO:0070613	0.000166	0.0013	-1.5	-0.01	4.84136	-12.6834	GSN|0.0718;VTN|0.0809;C3|1.3804;A2M|22.9087;C4A|0.3467	5	106	185	38520	http://www.ebi.ac.uk/QuickGO/GTerm?id=GO:0070613	[]
6	6	regulation of protein maturation	GO:1903317	0.000166	0.0013	-1.5	-0.01	4.84136	-12.6834	GSN|0.0718;VTN|0.0809;C3|1.3804;A2M|22.9087;C4A|0.3467	5	106	185	38520	http://www.ebi.ac.uk/QuickGO/GTerm?id=GO:1903317	[]
5	5	regulation of humoral immune response	GO:0002920	0.000167	0.00131	0.05	0.14	4.84136	-12.6834	VTN|0.0809;C3|1.3804;A2M|22.9087;C4A|0.3467	4	57	185	38520	http://www.ebi.ac.uk/QuickGO/GTerm?id=GO:0002920	[]
7	6,7	regulation of homotypic cell-cell adhesion	GO:0034110	0.00017	0.00133	6.33	0.76	4.84136	-12.6834	GSN|0.0718;DPP4|2.3335;VCAM1|9.4624;SPINK5|0.1406;HLA-DRA|1.406;IGFBP2|0.0698;SOD1|5.7016;SCGB1A1|8.5507	8	320	185	38520	http://www.ebi.ac.uk/QuickGO/GTerm?id=GO:0034110	[]
8	6,7,8	ERK1 and ERK2 cascade	GO:0070371	0.000171	0.00134	1	0.23	4.84136	-12.6834	CTSH|0.4699;EGF|0.7943;TFF2|0.2655;FN1|2.3988;SLC9A3R1|3.8726;APOA1|10.8643;C3|1.3804	7	240	185	38520	http://www.ebi.ac.uk/QuickGO/GTerm?id=GO:0070371	[]
3	3	leukocyte activation	GO:0045321	0.000172	0.00134	4.9	0.62	4.84136	-12.6834	GSN|0.0718;DPP4|2.3335;PGLYRP1|0.1722;LCP1|3.5645;PGLYRP2|0.3945;VCAM1|9.4624;SPINK5|0.1406;TFF2|0.2655;HLA-DRA|1.406;IGFBP2|0.0698;LAMP1|2.6062;SOD1|5.7016;SCGB1A1|8.5507	13	815	185	38520	http://www.ebi.ac.uk/QuickGO/GTerm?id=GO:0045321	[]
5	5	regulation of cell morphogenesis	GO:0022604	0.000173	0.00134	7.73	0.89	4.84136	-12.6834	ALDOA|2.9923;MSN|3.9084;OLFM4|10.7647;SERPINB3|0.0377;SPP1|0.1738;FN1|2.3988;SLC9A3R1|3.8726;VASN|0.0982;APOE|0.5105;APOA1|10.8643;HEXB|1.3804	11	602	185	38520	http://www.ebi.ac.uk/QuickGO/GTerm?id=GO:0022604	[]
3	3	positive regulation of metabolic process	GO:0009893	0.000174	0.00135	-0.68	0.07	4.84136	-12.6834	SEMG1|41.6869;CD14|0.8241;HBB|1.6749;HSP90AA1|2.466;GSN|0.0718;LUM|0.2421;MSN|3.9084;MYLK|0.7516;MDH1|2.7542;S100A9|0.0619;VTN|0.0809;LTF|26.7917;CTSC|0.3076;ACE|8.2414;HSPB1|0.3837;CTSH|0.4699;RDX|1.5704;SERPINB3|0.0377;PARK7|5.9704;HSPA8|2.3988;EGF|0.7943;CTSA|0.4571;TFF2|0.2655;CDH1|0.8091;CDH13|0.1706;FN1|2.3988;CD63|5.7016;CAT|22.4905;SOD1|5.7016;IL1RN|0.2729;APOE|0.5105;SH3BGRL3|0.0409;ANXA…	40	4656	185	38520	http://www.ebi.ac.uk/QuickGO/GTerm?id=GO:0009893	[]
7	5,6,7	regulation of intracellular signal transduction	GO:1902531	0.000178	0.00138	-0.67	0.07	4.84136	-12.6834	S100A9|0.0619;OLFM4|10.7647;LTF|26.7917;HSPB1|0.3837;SERPINB3|0.0377;PARK7|5.9704;EGF|0.7943;TFF2|0.2655;CDH13|0.1706;FN1|2.3988;SHISA5|0.2704;SLC9A3R1|3.8726;PRDX1|2.9107;CAT|22.4905;SPINK1|0.0113;SOD1|5.7016;IL1RN|0.2729;APOE|0.5105;APOA1|10.8643;S100A8|0.1644;C3|1.3804;A2M|22.9087	22	1946	185	38520	http://www.ebi.ac.uk/QuickGO/GTerm?id=GO:1902531	[]
7	5,6,7	positive regulation of steroid metabolic process	GO:0045940	0.00018	0.00139	0.29	0.16	4.84136	-12.6834	APOE|0.5105;APOA1|10.8643;APOA4|3.2211	3	23	185	38520	http://www.ebi.ac.uk/QuickGO/GTerm?id=GO:0045940	[]
5	5	cellular amide metabolic process	GO:0043603	0.00018	0.00139	11.75	1.29	4.84136	-12.6834	MME|2.2284;CPQ|0.3565;S100A9|0.0619;CNDP2|2.6303;PGLYRP2|0.3945;ACE|8.2414;HSPB1|0.3837;CTSH|0.4699;FOLR1|0.2188;APEH|1.7061;GAPDH|2.2699;SOD1|5.7016;APOE|0.5105;GLO1|4.4463;MMP7|0.0817;HEXB|1.3804;GGT1|5.0582;NEU1|0.597;CPE|21.0863;IDH1|6.9183	20	1679	185	38520	http://www.ebi.ac.uk/QuickGO/GTerm?id=GO:0043603	[]
8	8	gluconeogenesis	GO:0006094	0.000181	0.00139	1.9	0.32	4.84136	-12.6834	ALDOA|2.9923;MDH1|2.7542;PGK1|2.0324;TPI1|2.0893;GAPDH|2.2699	5	108	185	38520	http://www.ebi.ac.uk/QuickGO/GTerm?id=GO:0006094	[]
9	8,9	positive regulation of cysteine-type endopeptidase activity	GO:2001056	0.000181	0.00139	-4.06	-0.26	4.84136	-12.6834	CD14|0.8241;GSN|0.0718;S100A9|0.0619;CTSC|0.3076;CTSH|0.4699;S100A8|0.1644	6	170	185	38520	http://www.ebi.ac.uk/QuickGO/GTerm?id=GO:2001056	[]
5	5	regulation of cell size	GO:0008361	0.000181	0.00139	1.37	0.27	4.84136	-12.6834	MSN|3.9084;AQP1|0.0133;SPP1|0.1738;FN1|2.3988;SLC9A3R1|3.8726;APOE|0.5105	6	170	185	38520	http://www.ebi.ac.uk/QuickGO/GTerm?id=GO:0008361	[]
5	5	chemical homeostasis	GO:0048878	0.000188	0.00144	0.43	0.18	4.84136	-12.6834	KRT16|0.1995;S100A9|0.0619;LTF|26.7917;CTSH|0.4699;AQP1|0.0133;CKB|15.1356;LCN2|0.2208;SLC9A3R1|3.8726;CA2|8.7096;SOD1|5.7016;APOE|0.5105;APOA1|10.8643;S100A8|0.1644;PRCP|0.0685;HEXB|1.3804;APOA4|3.2211	16	1174	185	38520	http://www.ebi.ac.uk/QuickGO/GTerm?id=GO:0048878	[]
7	7	sterol biosynthetic process	GO:0016126	0.000191	0.00145	2.59	0.39	4.84136	-12.6834	SOD1|5.7016;APOE|0.5105;APOA1|10.8643;APOA4|3.2211	4	59	185	38520	http://www.ebi.ac.uk/QuickGO/GTerm?id=GO:0016126	[]
5	4,5	tissue regeneration	GO:0042246	0.000191	0.00145	-4.24	-0.28	4.84136	-12.6834	PKM|4.9659;CPQ|0.3565;GSN|0.0718;KLK6|0.0112	4	59	185	38520	http://www.ebi.ac.uk/QuickGO/GTerm?id=GO:0042246	[]
2	2	reproductive process	GO:0022414	0.000194	0.00147	8.19	0.94	4.84136	-12.6834	SEMG1|41.6869;CTSB|0.3105;ACE|8.2414;SERPINA5|0.0698;PARK7|5.9704;SPP1|0.1738;IGFBP2|0.0698;SPINK1|0.0113;TIMP1|18.197;SOD1|5.7016;IL1RN|0.2729;IGSF8|0.0973;MMP7|0.0817;HEXB|1.3804;SCGB1A1|8.5507;GGT1|5.0582;IDH1|6.9183	17	1301	185	38520	http://www.ebi.ac.uk/QuickGO/GTerm?id=GO:0022414	[]
3	3	negative regulation of locomotion	GO:0040013	0.000194	0.00147	-3.47	-0.21	4.84136	-12.6834	KRT16|0.1995;SEMG1|41.6869;GSN|0.0718;SLC9A3R1|3.8726;TIMP1|18.197;IL1RN|0.2729;APOE|0.5105	7	245	185	38520	http://www.ebi.ac.uk/QuickGO/GTerm?id=GO:0040013	[]
5	5	organic hydroxy compound biosynthetic process	GO:1901617	0.000199	0.00151	5.56	0.68	4.84136	-12.6834	DDT|4.5709;FABP5|0.0296;PARK7|5.9704;SOD1|5.7016;APOE|0.5105;APOA1|10.8643;APOA4|3.2211	7	246	185	38520	http://www.ebi.ac.uk/QuickGO/GTerm?id=GO:1901617	[]
2	2	cellular process	GO:0009987	0.000202	0.00152	-127.77	-12.42	4.84136	-12.6834	KRT16|0.1995;VWF|1.3804;IGFBP7|0.0824;UBA1|0.0107;PCDH1|0.4285;SEMG1|41.6869;LASP1|0.0281;CST6|0.0614;CTSB|0.3105;PDZK1|11.695;CD177|2.1878;CD14|0.8241;HBB|1.6749;HSP90AA1|2.466;MME|2.2284;CSTA|0.177;PKM|4.9659;CPQ|0.3565;GAA|0.6026;ALDOA|2.9923;GSN|0.0718;LUM|0.2421;P06314|0.0809;LRG1|0.8017;PDCD6IP|2.0701;MSN|3.9084;MYLK|0.7516;MDH1|2.7542;REG1A|0.0258;MGAM|3.5318;SERPINC1|0.6026;DPP4|2.3335;RN…	171	32069	185	38520	http://www.ebi.ac.uk/QuickGO/GTerm?id=GO:0009987	[]
5	5	regulation of response to oxidative stress	GO:1902882	0.000204	0.00154	3.48	0.48	4.84136	-12.6834	HSPB1|0.3837;PARK7|5.9704;HP|34.3558;SOD1|5.7016	4	60	185	38520	http://www.ebi.ac.uk/QuickGO/GTerm?id=GO:1902882	[]
6	6	protein-lipid complex assembly	GO:0065005	0.000205	0.00154	0.29	0.16	4.84136	-12.6834	APOE|0.5105;APOA1|10.8643;APOA4|3.2211	3	24	185	38520	http://www.ebi.ac.uk/QuickGO/GTerm?id=GO:0065005	[]
6	6	chronic inflammatory response	GO:0002544	0.000205	0.00154	-2.56	-0.12	4.84136	-12.6834	S100A9|0.0619;IL1RN|0.2729;S100A8|0.1644	3	24	185	38520	http://www.ebi.ac.uk/QuickGO/GTerm?id=GO:0002544	[]
7	6,7	intrinsic apoptotic signaling pathway	GO:0097193	0.000205	0.00154	0.42	0.18	4.84136	-12.6834	S100A9|0.0619;HSPB1|0.3837;PARK7|5.9704;YWHAZ|2.704;SHISA5|0.2704;SLC9A3R1|3.8726;SOD1|5.7016;S100A8|0.1644	8	329	185	38520	http://www.ebi.ac.uk/QuickGO/GTerm?id=GO:0097193	[]
5	5	steroid metabolic process	GO:0008202	0.00021	0.00157	-1.14	0.02	4.84136	-12.6834	SERPINA6|0.3873;CUBN|0.1067;LRP2|0.1459;CAT|22.4905;SOD1|5.7016;APOE|0.5105;APOA1|10.8643;APOA4|3.2211	8	330	185	38520	http://www.ebi.ac.uk/QuickGO/GTerm?id=GO:0008202	[]
5	5	positive regulation of angiogenesis	GO:0045766	0.000214	0.0016	-2.86	-0.15	4.84136	-12.6834	LRG1|0.8017;HSPB1|0.3837;CTSH|0.4699;AQP1|0.0133;C3|1.3804	5	112	185	38520	http://www.ebi.ac.uk/QuickGO/GTerm?id=GO:0045766	[]
5	5	protein complex subunit organization	GO:0071822	0.000217	0.00162	16.66	1.77	4.84136	-12.6834	VWF|1.3804;SEMG1|41.6869;HBB|1.6749;HSP90AA1|2.466;ALDOA|2.9923;GSN|0.0718;LUM|0.2421;PDCD6IP|2.0701;MYLK|0.7516;OLFM4|10.7647;LCP1|3.5645;COL6A1|0.3162;HBA1|1.5996;AHNAK|0.0643;RDX|1.5704;PARK7|5.9704;HSPA8|2.3988;EGF|0.7943;CRYAB|0.2333;FN1|2.3988;SLC9A3R1|3.8726;HLA-DRA|1.406;CAT|22.4905;SH3BGRL3|0.0409;ANXA5|14.0605;APOA1|10.8643	26	2540	185	38520	http://www.ebi.ac.uk/QuickGO/GTerm?id=GO:0071822	[]
5	5	urogenital system development	GO:0001655	0.000218	0.00162	-0.26	0.11	4.84136	-12.6834	MME|2.2284;ACE|8.2414;CTSH|0.4699;AQP1|0.0133;NID1|0.5058;FBN1|0.1585;CA2|8.7096;CAT|22.4905	8	332	185	38520	http://www.ebi.ac.uk/QuickGO/GTerm?id=GO:0001655	[]
9	7,9	negative regulation of cholesterol efflux	GO:0090370	0.000227	0.00167	-0.39	0.1	4.84136	-12.6834	EGF|0.7943;APOE|0.5105	2	5	185	38520	http://www.ebi.ac.uk/QuickGO/GTerm?id=GO:0090370	[]
9	6,7,9	negative regulation of cholesterol biosynthetic process	GO:0045541	0.000227	0.00167	-0.46	0.09	4.84136	-12.6834	SOD1|5.7016;APOE|0.5105	2	5	185	38520	http://www.ebi.ac.uk/QuickGO/GTerm?id=GO:0045541	[]
8	6,8	negative regulation of cholesterol metabolic process	GO:0090206	0.000227	0.00167	-0.46	0.09	4.84136	-12.6834	SOD1|5.7016;APOE|0.5105	2	5	185	38520	http://www.ebi.ac.uk/QuickGO/GTerm?id=GO:0090206	[]
5	5	membrane to membrane docking	GO:0022614	0.000227	0.00167	1.57	0.29	4.84136	-12.6834	MSN|3.9084;VCAM1|9.4624	2	5	185	38520	http://www.ebi.ac.uk/QuickGO/GTerm?id=GO:0022614	[]
8	4,7,8	positive regulation of protein localization to early endosome	GO:1902966	0.000227	0.00167	0.79	0.21	4.84136	-12.6834	MSN|3.9084;RDX|1.5704	2	5	185	38520	http://www.ebi.ac.uk/QuickGO/GTerm?id=GO:1902966	[]
7	6,7	regulation of protein localization to early endosome	GO:1902965	0.000227	0.00167	0.79	0.21	4.84136	-12.6834	MSN|3.9084;RDX|1.5704	2	5	185	38520	http://www.ebi.ac.uk/QuickGO/GTerm?id=GO:1902965	[]
6	6	carboxylic acid metabolic process	GO:0019752	0.00023	0.00169	10.52	1.17	4.84136	-12.6834	PKM|4.9659;ALDOA|2.9923;MDH1|2.7542;CNDP2|2.6303;GGH|0.492;PGK1|2.0324;BGN|0.1995;CKB|15.1356;FOLR1|0.2188;PARK7|5.9704;TPI1|2.0893;GAPDH|2.2699;BHMT|0.8166;IL1RN|0.2729;APOA1|10.8643;C3|1.3804;APOA4|3.2211;GGT1|5.0582;IDH1|6.9183	19	1578	185	38520	http://www.ebi.ac.uk/QuickGO/GTerm?id=GO:0019752	[]
7	5,7	negative regulation of wound healing	GO:0061045	0.000231	0.00169	-2.94	-0.15	4.84136	-12.6834	VTN|0.0809;APOE|0.5105;ANXA5|14.0605;PLG|0.3908	4	62	185	38520	http://www.ebi.ac.uk/QuickGO/GTerm?id=GO:0061045	[]
8	7,8	nicotinamide nucleotide metabolic process	GO:0046496	0.000236	0.00172	3.44	0.47	4.84136	-12.6834	PKM|4.9659;ALDOA|2.9923;MDH1|2.7542;PGK1|2.0324;TPI1|2.0893;GAPDH|2.2699;IDH1|6.9183	7	253	185	38520	http://www.ebi.ac.uk/QuickGO/GTerm?id=GO:0046496	[]
7	6,7	pyridine nucleotide metabolic process	GO:0019362	0.000236	0.00172	3.44	0.47	4.84136	-12.6834	PKM|4.9659;ALDOA|2.9923;MDH1|2.7542;PGK1|2.0324;TPI1|2.0893;GAPDH|2.2699;IDH1|6.9183	7	253	185	38520	http://www.ebi.ac.uk/QuickGO/GTerm?id=GO:0019362	[]
4	4	regulation of protein localization	GO:0032880	0.00024	0.00175	7.5	0.87	4.84136	-12.6834	PDZK1|11.695;CD14|0.8241;GSN|0.0718;MSN|3.9084;LCP1|3.5645;RDX|1.5704;PARK7|5.9704;YWHAZ|2.704;EGF|0.7943;CDH1|0.8091;FN1|2.3988;SLC9A3R1|3.8726;PRDX1|2.9107;APOA1|10.8643	14	959	185	38520	http://www.ebi.ac.uk/QuickGO/GTerm?id=GO:0032880	[]
5	5	renal system process	GO:0003014	0.000242	0.00176	3.02	0.43	4.84136	-12.6834	HBB|1.6749;GSN|0.0718;AQP1|0.0133;SLC9A3R1|3.8726;IGHA2|1.977	5	115	185	38520	http://www.ebi.ac.uk/QuickGO/GTerm?id=GO:0003014	[]
5	5	muscle system process	GO:0003012	0.000244	0.00177	-5.53	-0.41	4.84136	-12.6834	GAA|0.6026;ALDOA|2.9923;GSN|0.0718;MYLK|0.7516;CRYAB|0.2333;DSC2|0.118;TPM4|0.3076;SOD1|5.7016;PI16|0.182	9	428	185	38520	http://www.ebi.ac.uk/QuickGO/GTerm?id=GO:0003012	[]
6	5,6	morphogenesis of an epithelium	GO:0002009	0.000249	0.0018	-6.55	-0.51	4.84136	-12.6834	KRT16|0.1995;GSN|0.0718;MSN|3.9084;LCP1|3.5645;CTSH|0.4699;FOLR1|0.2188;EGF|0.7943;SLC9A3R1|3.8726;CA2|8.7096;KRT6A|0.1127	10	526	185	38520	http://www.ebi.ac.uk/QuickGO/GTerm?id=GO:0002009	[]
5	5	amine metabolic process	GO:0009308	0.00026	0.00187	5.23	0.65	4.84136	-12.6834	VCAM1|9.4624;FABP5|0.0296;PARK7|5.9704;AOC1|2.0701;BHMT|0.8166;APOA1|10.8643;APOA4|3.2211	7	257	185	38520	http://www.ebi.ac.uk/QuickGO/GTerm?id=GO:0009308	[]
6	6	protein-lipid complex remodeling	GO:0034368	0.000261	0.00187	0.29	0.16	4.84136	-12.6834	APOE|0.5105;APOA1|10.8643;APOA4|3.2211	3	26	185	38520	http://www.ebi.ac.uk/QuickGO/GTerm?id=GO:0034368	[]
7	4,5,7	plasma lipoprotein particle remodeling	GO:0034369	0.000261	0.00187	0.29	0.16	4.84136	-12.6834	APOE|0.5105;APOA1|10.8643;APOA4|3.2211	3	26	185	38520	http://www.ebi.ac.uk/QuickGO/GTerm?id=GO:0034369	[]
5	5	macromolecular complex remodeling	GO:0034367	0.000261	0.00187	0.29	0.16	4.84136	-12.6834	APOE|0.5105;APOA1|10.8643;APOA4|3.2211	3	26	185	38520	http://www.ebi.ac.uk/QuickGO/GTerm?id=GO:0034367	[]
3	3	cellular localization	GO:0051641	0.000262	0.00188	23.73	2.47	4.84136	-12.6834	VWF|1.3804;PDZK1|11.695;CD14|0.8241;HSP90AA1|2.466;GAA|0.6026;ALDOA|2.9923;GSN|0.0718;PDCD6IP|2.0701;MSN|3.9084;LCP1|3.5645;AQP1|0.0133;RDX|1.5704;LCN2|0.2208;PARK7|5.9704;YWHAZ|2.704;HSPA8|2.3988;LMAN2|0.2466;EGF|0.7943;CTSA|0.4571;CRYAB|0.2333;CDH1|0.8091;CDH13|0.1706;FN1|2.3988;SERPINA1|0.6546;CD63|5.7016;SLC9A3R1|3.8726;PRDX1|2.9107;PTPRN|0.7047;LAMP1|2.6062;SPINK1|0.0113;TIMP1|18.197;SOD1|5.…	38	4423	185	38520	http://www.ebi.ac.uk/QuickGO/GTerm?id=GO:0051641	[]
4	4	regulation of catabolic process	GO:0009894	0.000263	0.00188	10.31	1.15	4.84136	-12.6834	MSN|3.9084;MYLK|0.7516;MDH1|2.7542;CTSC|0.3076;RDX|1.5704;PARK7|5.9704;HP|34.3558;EGF|0.7943;TIMP1|18.197;APOE|0.5105;ANXA5|14.0605;APOA1|10.8643;KRT6A|0.1127;APOA4|3.2211;IDH1|6.9183	15	1087	185	38520	http://www.ebi.ac.uk/QuickGO/GTerm?id=GO:0009894	[]
5	5	cell-cell adhesion via plasma-membrane adhesion molecules	GO:0098742	0.000288	0.00206	-5.24	-0.38	4.84136	-12.6834	PCDH1|0.4285;VCAM1|9.4624;DSC2|0.118;CDH1|0.8091;CDH13|0.1706;IL1RN|0.2729;APOA1|10.8643;CDH11|0.3105	8	346	185	38520	http://www.ebi.ac.uk/QuickGO/GTerm?id=GO:0098742	[]
5	4,5	positive regulation of defense response	GO:0031349	0.000289	0.00206	-5.74	-0.43	4.84136	-12.6834	CTSB|0.3105;CD14|0.8241;S100A9|0.0619;PGLYRP1|0.1722;LTF|26.7917;PGLYRP2|0.3945;LAMP1|2.6062;S100A8|0.1644;C3|1.3804	9	438	185	38520	http://www.ebi.ac.uk/QuickGO/GTerm?id=GO:0031349	[]
4	4	response to radiation	GO:0009314	0.000293	0.00209	-8.78	-0.73	4.84136	-12.6834	MME|2.2284;SERPINB13|0.3373;AQP1|0.0133;KRT13|0.0373;CRYAB|0.2333;LRP2|0.1459;CAT|22.4905;APOE|0.5105;APOA1|10.8643;APOA4|3.2211	10	537	185	38520	http://www.ebi.ac.uk/QuickGO/GTerm?id=GO:0009314	[]
6	6	collagen metabolic process	GO:0032963	0.000295	0.00209	-4.85	-0.34	4.84136	-12.6834	CTSB|0.3105;COL6A1|0.3162;COL15A1|0.1556;MMP7|0.0817;KLK6|0.0112	5	120	185	38520	http://www.ebi.ac.uk/QuickGO/GTerm?id=GO:0032963	[]
5	5	positive regulation of cell migration	GO:0030335	0.000299	0.00212	-6.41	-0.49	4.84136	-12.6834	MYLK|0.7516;VTN|0.0809;HSPB1|0.3837;CTSH|0.4699;AQP1|0.0133;SERPINB3|0.0377;CDH13|0.1706;FN1|2.3988	8	348	185	38520	http://www.ebi.ac.uk/QuickGO/GTerm?id=GO:0030335	[]
5	4,5	regulation of cellular metabolic process	GO:0031323	0.000304	0.00215	-50.55	-4.83	4.84136	-12.6834	SEMG1|41.6869;CST6|0.0614;CD14|0.8241;HBB|1.6749;HSP90AA1|2.466;CSTA|0.177;GSN|0.0718;LUM|0.2421;MSN|3.9084;MYLK|0.7516;MDH1|2.7542;SERPINC1|0.6026;S100A9|0.0619;VTN|0.0809;LTF|26.7917;SERPINB13|0.3373;AHSG|0.1432;CTSC|0.3076;ACE|8.2414;HSPB1|0.3837;CTSH|0.4699;AQP1|0.0133;PRG4|0.3631;AHNAK|0.0643;RDX|1.5704;SERPINB3|0.0377;SERPINA5|0.0698;PARK7|5.9704;HP|34.3558;A2ML1|0.2168;HSPA8|2.3988;SERPINA…	69	9878	185	38520	http://www.ebi.ac.uk/QuickGO/GTerm?id=GO:0031323	[]
2	2	cell killing	GO:0001906	0.000307	0.00216	0.84	0.22	4.84136	-12.6834	CTSC|0.3076;CTSH|0.4699;PRDX1|2.9107;DCD|4.9204;LAMP1|2.6062	5	121	185	38520	http://www.ebi.ac.uk/QuickGO/GTerm?id=GO:0001906	[]
5	5	regulation of secretion	GO:0051046	0.000318	0.00224	-9.88	-0.84	4.84136	-12.6834	CD14|0.8241;PDCD6IP|2.0701;S100A9|0.0619;AQP1|0.0133;EGF|0.7943;TFF2|0.2655;FN1|2.3988;SLC9A3R1|3.8726;LAMP1|2.6062;SPINK1|0.0113;IL1RN|0.2729;APOA1|10.8643;S100A8|0.1644	13	869	185	38520	http://www.ebi.ac.uk/QuickGO/GTerm?id=GO:0051046	[]
4	4	positive regulation of vasculature development	GO:1904018	0.000319	0.00224	-2.86	-0.15	4.84136	-12.6834	LRG1|0.8017;HSPB1|0.3837;CTSH|0.4699;AQP1|0.0133;C3|1.3804	5	122	185	38520	http://www.ebi.ac.uk/QuickGO/GTerm?id=GO:1904018	[]
8	6,7,8	regulation of natural killer cell activation	GO:0032814	0.000327	0.00229	-0.42	0.09	4.84136	-12.6834	PGLYRP1|0.1722;PGLYRP2|0.3945;LAMP1|2.6062	3	28	185	38520	http://www.ebi.ac.uk/QuickGO/GTerm?id=GO:0032814	[]
5	5	pyridine-containing compound metabolic process	GO:0072524	0.000327	0.00229	3.44	0.47	4.84136	-12.6834	PKM|4.9659;ALDOA|2.9923;MDH1|2.7542;PGK1|2.0324;TPI1|2.0893;GAPDH|2.2699;IDH1|6.9183	7	267	185	38520	http://www.ebi.ac.uk/QuickGO/GTerm?id=GO:0072524	[]
8	8	blood vessel endothelial cell migration	GO:0043534	0.00033	0.0023	-3.13	-0.17	4.84136	-12.6834	HSPB1|0.3837;APOE|0.5105;SH3BGRL3|0.0409;APOA1|10.8643	4	68	185	38520	http://www.ebi.ac.uk/QuickGO/GTerm?id=GO:0043534	[]
7	7	anion homeostasis	GO:0055081	0.00033	0.0023	3.1	0.44	4.84136	-12.6834	CKB|15.1356;SLC9A3R1|3.8726;APOE|0.5105;APOA1|10.8643	4	68	185	38520	http://www.ebi.ac.uk/QuickGO/GTerm?id=GO:0055081	[]
5	5	regulation of sperm motility	GO:1901317	0.00034	0.00234	2.77	0.41	4.84136	-12.6834	SEMG1|41.6869;ANXA5|14.0605	2	6	185	38520	http://www.ebi.ac.uk/QuickGO/GTerm?id=GO:1901317	[]
6	6	negative regulation of natural killer cell activation	GO:0032815	0.00034	0.00234	-1.17	0.02	4.84136	-12.6834	PGLYRP1|0.1722;PGLYRP2|0.3945	2	6	185	38520	http://www.ebi.ac.uk/QuickGO/GTerm?id=GO:0032815	[]
8	8	protein localization to early endosome	GO:1902946	0.00034	0.00234	0.79	0.21	4.84136	-12.6834	MSN|3.9084;RDX|1.5704	2	6	185	38520	http://www.ebi.ac.uk/QuickGO/GTerm?id=GO:1902946	[]
7	6,7	cellular response to copper ion	GO:0071280	0.00034	0.00234	1.56	0.29	4.84136	-12.6834	AQP1|0.0133;AOC1|2.0701	2	6	185	38520	http://www.ebi.ac.uk/QuickGO/GTerm?id=GO:0071280	[]
7	5,6,7	negative regulation of extracellular matrix organization	GO:1903054	0.00034	0.00234	0.75	0.21	4.84136	-12.6834	DPP4|2.3335;HSPA8|2.3988	2	6	185	38520	http://www.ebi.ac.uk/QuickGO/GTerm?id=GO:1903054	[]
5	5	response to ozone	GO:0010193	0.00034	0.00234	2.28	0.36	4.84136	-12.6834	CAT|22.4905;SCGB1A1|8.5507	2	6	185	38520	http://www.ebi.ac.uk/QuickGO/GTerm?id=GO:0010193	[]
8	7,8	negative regulation of serine-type peptidase activity	GO:1902572	0.00034	0.00234	-2.8	-0.14	4.84136	-12.6834	SPINK5|0.1406;SPINK1|0.0113	2	6	185	38520	http://www.ebi.ac.uk/QuickGO/GTerm?id=GO:1902572	[]
7	4,6,7	negative regulation of ion transport	GO:0043271	0.000343	0.00236	-2.21	-0.08	4.84136	-12.6834	SEMG1|41.6869;SLC9A3R1|3.8726;SPINK1|0.0113;IL1RN|0.2729;APOE|0.5105	5	124	185	38520	http://www.ebi.ac.uk/QuickGO/GTerm?id=GO:0043271	[]
7	7	Fc receptor signaling pathway	GO:0038093	0.000348	0.00239	-7.09	-0.56	4.84136	-12.6834	HSP90AA1|2.466;P06314|0.0809;EGF|0.7943;P01594|0.0643;IGHG3|0.2992;P01614|0.7727;P01616|0.0145;P01617|0.0146	8	356	185	38520	http://www.ebi.ac.uk/QuickGO/GTerm?id=GO:0038093	[]
4	4	cellular response to external stimulus	GO:0071496	0.000349	0.00239	-8.81	-0.73	4.84136	-12.6834	CTSB|0.3105;MYLK|0.7516;MDH1|2.7542;AQP1|0.0133;FOLR1|0.2188;PARK7|5.9704;DSC2|0.118;AOC1|2.0701;ANXA5|14.0605;MMP7|0.0817;KRT6A|0.1127	11	654	185	38520	http://www.ebi.ac.uk/QuickGO/GTerm?id=GO:0071496	[]
5	5	carbohydrate biosynthetic process	GO:0016051	0.00035	0.00239	3.12	0.44	4.84136	-12.6834	ALDOA|2.9923;MDH1|2.7542;PGK1|2.0324;EGF|0.7943;TPI1|2.0893;GAPDH|2.2699;SORD|13.1826	7	270	185	38520	http://www.ebi.ac.uk/QuickGO/GTerm?id=GO:0016051	[]
5	4,5	positive regulation of cell motility	GO:2000147	0.000355	0.00242	-6.41	-0.49	4.84136	-12.6834	MYLK|0.7516;VTN|0.0809;HSPB1|0.3837;CTSH|0.4699;AQP1|0.0133;SERPINB3|0.0377;CDH13|0.1706;FN1|2.3988	8	357	185	38520	http://www.ebi.ac.uk/QuickGO/GTerm?id=GO:2000147	[]
8	5,6,7,8	positive regulation of intracellular signal transduction	GO:1902533	0.000358	0.00244	-1.51	-0.01	4.84136	-12.6834	S100A9|0.0619;LTF|26.7917;PARK7|5.9704;EGF|0.7943;TFF2|0.2655;CDH13|0.1706;SHISA5|0.2704;SLC9A3R1|3.8726;CAT|22.4905;SOD1|5.7016;IL1RN|0.2729;APOA1|10.8643;S100A8|0.1644;C3|1.3804	14	998	185	38520	http://www.ebi.ac.uk/QuickGO/GTerm?id=GO:1902533	[]
6	5,6	regulation of extracellular matrix organization	GO:1903053	0.000363	0.00246	1.52	0.29	4.84136	-12.6834	DPP4|2.3335;PARK7|5.9704;HSPA8|2.3988	3	29	185	38520	http://www.ebi.ac.uk/QuickGO/GTerm?id=GO:1903053	[]
10	6,7,8,10	regulation of cysteine-type endopeptidase activity involved in apoptotic signaling pathway	GO:2001267	0.000363	0.00246	-0.78	0.06	4.84136	-12.6834	CD14|0.8241;GSN|0.0718;PARK7|5.9704	3	29	185	38520	http://www.ebi.ac.uk/QuickGO/GTerm?id=GO:2001267	[]
5	4,5	cellular homeostasis	GO:0019725	0.000365	0.00247	0.92	0.23	4.84136	-12.6834	GAA|0.6026;ALDOA|2.9923;S100A9|0.0619;LTF|26.7917;AQP1|0.0133;CKB|15.1356;LCN2|0.2208;SLC9A3R1|3.8726;CA2|8.7096;SOD1|5.7016;APOE|0.5105;SH3BGRL3|0.0409;S100A8|0.1644;HEXB|1.3804	14	1000	185	38520	http://www.ebi.ac.uk/QuickGO/GTerm?id=GO:0019725	[]
5	5	lipid catabolic process	GO:0016042	0.000368	0.00249	5.52	0.68	4.84136	-12.6834	PRDX6|8.9536;FABP5|0.0296;APOE|0.5105;APOA1|10.8643;HEXB|1.3804;APOA4|3.2211;NEU1|0.597;IDH1|6.9183	8	359	185	38520	http://www.ebi.ac.uk/QuickGO/GTerm?id=GO:0016042	[]
4	4	tissue morphogenesis	GO:0048729	0.000372	0.00251	-6.68	-0.52	4.84136	-12.6834	KRT16|0.1995;GSN|0.0718;MSN|3.9084;MYLK|0.7516;LCP1|3.5645;CTSH|0.4699;FOLR1|0.2188;EGF|0.7943;SLC9A3R1|3.8726;CA2|8.7096;KRT6A|0.1127	11	659	185	38520	http://www.ebi.ac.uk/QuickGO/GTerm?id=GO:0048729	[]
7	7	monocarboxylic acid metabolic process	GO:0032787	0.000376	0.00253	6.86	0.81	4.84136	-12.6834	PKM|4.9659;ALDOA|2.9923;PGK1|2.0324;BGN|0.1995;PARK7|5.9704;TPI1|2.0893;GAPDH|2.2699;APOA1|10.8643;C3|1.3804;APOA4|3.2211;GGT1|5.0582;IDH1|6.9183	12	770	185	38520	http://www.ebi.ac.uk/QuickGO/GTerm?id=GO:0032787	[]
6	4,6	response to hypoxia	GO:0001666	0.000382	0.00257	3.52	0.48	4.84136	-12.6834	PKM|4.9659;DPP4|2.3335;AQP1|0.0133;CRYAB|0.2333;VASN|0.0982;CAT|22.4905;SOD3|8.7902	7	274	185	38520	http://www.ebi.ac.uk/QuickGO/GTerm?id=GO:0001666	[]
7	6,7	positive regulation of apoptotic process	GO:0043065	0.000392	0.00263	-3.7	-0.23	4.84136	-12.6834	CD14|0.8241;GSN|0.0718;S100A9|0.0619;CTSC|0.3076;CTSH|0.4699;PARK7|5.9704;YWHAZ|2.704;SLC9A3R1|3.8726;SOD1|5.7016;ANXA5|14.0605;S100A8|0.1644	11	663	185	38520	http://www.ebi.ac.uk/QuickGO/GTerm?id=GO:0043065	[]
5	5	regulation of ion transport	GO:0043269	0.000394	0.00264	-1.53	-0.01	4.84136	-12.6834	SEMG1|41.6869;PDZK1|11.695;MYLK|0.7516;AHNAK|0.0643;PARK7|5.9704;EGF|0.7943;CD63|5.7016;SLC9A3R1|3.8726;CA2|8.7096;SPINK1|0.0113;IL1RN|0.2729;APOE|0.5105	12	774	185	38520	http://www.ebi.ac.uk/QuickGO/GTerm?id=GO:0043269	[]
4	4	regulation of protein stability	GO:0031647	0.000399	0.00266	4.06	0.53	4.84136	-12.6834	GSN|0.0718;CTSH|0.4699;PARK7|5.9704;GAPDH|2.2699;LAMP1|2.6062;APOA1|10.8643	6	197	185	38520	http://www.ebi.ac.uk/QuickGO/GTerm?id=GO:0031647	[]
7	6,7	oxygen transport	GO:0015671	0.000402	0.00268	1.84	0.32	4.84136	-12.6834	HBB|1.6749;HBA1|1.5996;HBD|25.5859	3	30	185	38520	http://www.ebi.ac.uk/QuickGO/GTerm?id=GO:0015671	[]
9	6,7,8,9	regulation of calcium ion import	GO:0090279	0.000402	0.00268	-1.62	-0.02	4.84136	-12.6834	SEMG1|41.6869;EGF|0.7943;SPINK1|0.0113	3	30	185	38520	http://www.ebi.ac.uk/QuickGO/GTerm?id=GO:0090279	[]
4	4	positive regulation of cellular component movement	GO:0051272	0.000411	0.00273	-6.41	-0.49	4.84136	-12.6834	MYLK|0.7516;VTN|0.0809;HSPB1|0.3837;CTSH|0.4699;AQP1|0.0133;SERPINB3|0.0377;CDH13|0.1706;FN1|2.3988	8	365	185	38520	http://www.ebi.ac.uk/QuickGO/GTerm?id=GO:0051272	[]
9	7,8,9	activation of cysteine-type endopeptidase activity involved in apoptotic process	GO:0006919	0.000412	0.00273	-2.92	-0.15	4.84136	-12.6834	CD14|0.8241;S100A9|0.0619;CTSC|0.3076;CTSH|0.4699;S100A8|0.1644	5	129	185	38520	http://www.ebi.ac.uk/QuickGO/GTerm?id=GO:0006919	[]
6	5,6	positive regulation of programmed cell death	GO:0043068	0.000417	0.00276	-3.7	-0.23	4.84136	-12.6834	CD14|0.8241;GSN|0.0718;S100A9|0.0619;CTSC|0.3076;CTSH|0.4699;PARK7|5.9704;YWHAZ|2.704;SLC9A3R1|3.8726;SOD1|5.7016;ANXA5|14.0605;S100A8|0.1644	11	668	185	38520	http://www.ebi.ac.uk/QuickGO/GTerm?id=GO:0043068	[]
5	5	response to decreased oxygen levels	GO:0036293	0.000426	0.00281	3.52	0.48	4.84136	-12.6834	PKM|4.9659;DPP4|2.3335;AQP1|0.0133;CRYAB|0.2333;VASN|0.0982;CAT|22.4905;SOD3|8.7902	7	279	185	38520	http://www.ebi.ac.uk/QuickGO/GTerm?id=GO:0036293	[]
4	4	cell projection organization	GO:0030030	0.000447	0.00295	-12.47	-1.09	4.84136	-12.6834	HSP90AA1|2.466;GSN|0.0718;MYLK|0.7516;COL6A1|0.3162;AQP1|0.0133;RDX|1.5704;HSPA8|2.3988;CDH1|0.8091;SPP1|0.1738;CDH13|0.1706;FN1|2.3988;SLC9A3R1|3.8726;SOD1|5.7016;APOE|0.5105;APOA1|10.8643;CDH11|0.3105;APOA4|3.2211;NEU1|0.597;KLK6|0.0112	19	1665	185	38520	http://www.ebi.ac.uk/QuickGO/GTerm?id=GO:0030030	[]
7	6,7	negative regulation of heterotypic cell-cell adhesion	GO:0034115	0.000474	0.00309	-0.47	0.09	4.84136	-12.6834	IL1RN|0.2729;APOA1|10.8643	2	7	185	38520	http://www.ebi.ac.uk/QuickGO/GTerm?id=GO:0034115	[]
6	6	regulation of cell-cell adhesion involved in gastrulation	GO:0070587	0.000474	0.00309	-0.47	0.09	4.84136	-12.6834	IL1RN|0.2729;APOA1|10.8643	2	7	185	38520	http://www.ebi.ac.uk/QuickGO/GTerm?id=GO:0070587	[]
8	6,7,8	positive regulation of apoptotic cell clearance	GO:2000427	0.000474	0.00309	0.32	0.17	4.84136	-12.6834	C3|1.3804;C4A|0.3467	2	7	185	38520	http://www.ebi.ac.uk/QuickGO/GTerm?id=GO:2000427	[]
4	4	protein oxidation	GO:0018158	0.000474	0.00309	1.81	0.31	4.84136	-12.6834	PARK7|5.9704;APOA1|10.8643	2	7	185	38520	http://www.ebi.ac.uk/QuickGO/GTerm?id=GO:0018158	[]
10	6,7,8,9,10	positive regulation of oxidative stress-induced intrinsic apoptotic signaling pathway	GO:1902177	0.000474	0.00309	1.53	0.29	4.84136	-12.6834	PARK7|5.9704;SOD1|5.7016	2	7	185	38520	http://www.ebi.ac.uk/QuickGO/GTerm?id=GO:1902177	[]
5	5	establishment of Golgi localization	GO:0051683	0.000474	0.00309	1.02	0.24	4.84136	-12.6834	YWHAZ|2.704;SLC9A3R1|3.8726	2	7	185	38520	http://www.ebi.ac.uk/QuickGO/GTerm?id=GO:0051683	[]
8	8	regulation of serine-type endopeptidase activity	GO:1900003	0.000474	0.00309	0.33	0.17	4.84136	-12.6834	SEMG1|41.6869;SPINK1|0.0113	2	7	185	38520	http://www.ebi.ac.uk/QuickGO/GTerm?id=GO:1900003	[]
7	6,7	anion transport	GO:0006820	0.000475	0.00309	10.92	1.21	4.84136	-12.6834	PDZK1|11.695;HBB|1.6749;HBA1|1.5996;ACE|8.2414;AQP1|0.0133;FOLR1|0.2188;SLC9A3R1|3.8726;CA2|8.7096;CA1|52.9663;IL1RN|0.2729;APOE|0.5105;APOA1|10.8643;APOA4|3.2211;SLC3A2|0.4742	14	1027	185	38520	http://www.ebi.ac.uk/QuickGO/GTerm?id=GO:0006820	[]
3	3	positive regulation of locomotion	GO:0040017	0.000483	0.00313	-6.41	-0.49	4.84136	-12.6834	MYLK|0.7516;VTN|0.0809;HSPB1|0.3837;CTSH|0.4699;AQP1|0.0133;SERPINB3|0.0377;CDH13|0.1706;FN1|2.3988	8	374	185	38520	http://www.ebi.ac.uk/QuickGO/GTerm?id=GO:0040017	[]
4	4	establishment of localization in cell	GO:0051649	0.000486	0.00315	20.27	2.13	4.84136	-12.6834	VWF|1.3804;PDZK1|11.695;CD14|0.8241;HSP90AA1|2.466;ALDOA|2.9923;PDCD6IP|2.0701;MSN|3.9084;LCP1|3.5645;AQP1|0.0133;RDX|1.5704;LCN2|0.2208;PARK7|5.9704;YWHAZ|2.704;HSPA8|2.3988;LMAN2|0.2466;EGF|0.7943;CTSA|0.4571;CRYAB|0.2333;CDH1|0.8091;FN1|2.3988;SERPINA1|0.6546;CD63|5.7016;SLC9A3R1|3.8726;PRDX1|2.9107;PTPRN|0.7047;LAMP1|2.6062;SPINK1|0.0113;TIMP1|18.197;SOD1|5.7016;IL1RN|0.2729;APOE|0.5105;APOA1…	34	3916	185	38520	http://www.ebi.ac.uk/QuickGO/GTerm?id=GO:0051649	[]
4	4	negative regulation of response to oxidative stress	GO:1902883	0.000488	0.00315	0.42	0.18	4.84136	-12.6834	HSPB1|0.3837;PARK7|5.9704;HP|34.3558	3	32	185	38520	http://www.ebi.ac.uk/QuickGO/GTerm?id=GO:1902883	[]
8	6,7,8	regulation of oxidative stress-induced intrinsic apoptotic signaling pathway	GO:1902175	0.000488	0.00315	0.42	0.18	4.84136	-12.6834	HSPB1|0.3837;PARK7|5.9704;SOD1|5.7016	3	32	185	38520	http://www.ebi.ac.uk/QuickGO/GTerm?id=GO:1902175	[]
6	4,5,6	negative regulation of cellular response to oxidative stress	GO:1900408	0.000488	0.00315	0.42	0.18	4.84136	-12.6834	HSPB1|0.3837;PARK7|5.9704;HP|34.3558	3	32	185	38520	http://www.ebi.ac.uk/QuickGO/GTerm?id=GO:1900408	[]
4	3,4	regulation of multi-organism process	GO:0043900	0.000489	0.00315	-4.28	-0.28	4.84136	-12.6834	GSN|0.0718;MYLK|0.7516;MDH1|2.7542;LTF|26.7917;SPINK1|0.0113;TIMP1|18.197;APOE|0.5105;ANXA5|14.0605;KRT6A|0.1127	9	471	185	38520	http://www.ebi.ac.uk/QuickGO/GTerm?id=GO:0043900	[]
4	4	oxidation-reduction process	GO:0055114	0.000493	0.00317	16.43	1.75	4.84136	-12.6834	HBB|1.6749;PKM|4.9659;GAA|0.6026;ALDOA|2.9923;MDH1|2.7542;PRDX6|8.9536;HBA1|1.5996;VCAM1|9.4624;PGK1|2.0324;PARK7|5.9704;AOC1|2.0701;TPI1|2.0893;GAPDH|2.2699;PRDX2|57.0164;PRDX1|2.9107;SORD|13.1826;CAT|22.4905;SOD1|5.7016;SH3BGRL3|0.0409;APOA1|10.8643;APOA4|3.2211;SOD3|8.7902;IDH1|6.9183	23	2240	185	38520	http://www.ebi.ac.uk/QuickGO/GTerm?id=GO:0055114	[]
3	3	cellular component biogenesis	GO:0044085	0.000496	0.00318	20.68	2.17	4.84136	-12.6834	VWF|1.3804;SEMG1|41.6869;HBB|1.6749;HSP90AA1|2.466;ALDOA|2.9923;GSN|0.0718;PDCD6IP|2.0701;MSN|3.9084;MYLK|0.7516;OLFM4|10.7647;LCP1|3.5645;COL6A1|0.3162;HBA1|1.5996;ACE|8.2414;AQP1|0.0133;AHNAK|0.0643;RDX|1.5704;PARK7|5.9704;YWHAZ|2.704;KRT5|0.3802;EGF|0.7943;CRYAB|0.2333;CDH1|0.8091;CDH13|0.1706;FN1|2.3988;SLC9A3R1|3.8726;HLA-DRA|1.406;CAT|22.4905;APOE|0.5105;ANXA5|14.0605;APOA1|10.8643;CDH11|0.…	33	3761	185	38520	http://www.ebi.ac.uk/QuickGO/GTerm?id=GO:0044085	[]
4	3,4	developmental growth	GO:0048589	0.000507	0.00325	-7.31	-0.58	4.84136	-12.6834	PKM|4.9659;CPQ|0.3565;GSN|0.0718;SPP1|0.1738;FN1|2.3988;SOD1|5.7016;APOE|0.5105;C3|1.3804;PI16|0.182;KLK6|0.0112	10	576	185	38520	http://www.ebi.ac.uk/QuickGO/GTerm?id=GO:0048589	[]
8	8	activation of cysteine-type endopeptidase activity	GO:0097202	0.000524	0.00335	-2.92	-0.15	4.84136	-12.6834	CD14|0.8241;S100A9|0.0619;CTSC|0.3076;CTSH|0.4699;S100A8|0.1644	5	136	185	38520	http://www.ebi.ac.uk/QuickGO/GTerm?id=GO:0097202	[]
5	4,5	regulation of organelle assembly	GO:1902115	0.000524	0.00335	2.8	0.41	4.84136	-12.6834	GSN|0.0718;PDCD6IP|2.0701;MSN|3.9084;LCP1|3.5645;RDX|1.5704	5	136	185	38520	http://www.ebi.ac.uk/QuickGO/GTerm?id=GO:1902115	[]
6	5,6	regulation of triglyceride metabolic process	GO:0090207	0.000535	0.00341	1.68	0.3	4.84136	-12.6834	APOA1|10.8643;C3|1.3804;APOA4|3.2211	3	33	185	38520	http://www.ebi.ac.uk/QuickGO/GTerm?id=GO:0090207	[]
4	4	negative regulation of cell motility	GO:2000146	0.000545	0.00346	-1.91	-0.05	4.84136	-12.6834	KRT16|0.1995;SEMG1|41.6869;SLC9A3R1|3.8726;TIMP1|18.197;IL1RN|0.2729;APOE|0.5105	6	209	185	38520	http://www.ebi.ac.uk/QuickGO/GTerm?id=GO:2000146	[]
7	6,7	regulation of acute inflammatory response	GO:0002673	0.000557	0.00353	0.05	0.14	4.84136	-12.6834	VTN|0.0809;C3|1.3804;A2M|22.9087;C4A|0.3467	4	78	185	38520	http://www.ebi.ac.uk/QuickGO/GTerm?id=GO:0002673	[]
6	5,6	negative regulation of cell-cell adhesion	GO:0022408	0.00056	0.00354	-1.97	-0.06	4.84136	-12.6834	CDH1|0.8091;IL1RN|0.2729;APOA1|10.8643;PLG|0.3908;SCGB1A1|8.5507	5	138	185	38520	http://www.ebi.ac.uk/QuickGO/GTerm?id=GO:0022408	[]
8	6,7,8	positive regulation of mitophagy	GO:1903599	0.00056	0.00354	1.07	0.24	4.84136	-12.6834	MYLK|0.7516;MDH1|2.7542;PARK7|5.9704;ANXA5|14.0605;KRT6A|0.1127	5	138	185	38520	http://www.ebi.ac.uk/QuickGO/GTerm?id=GO:1903599	[]
5	5	single fertilization	GO:0007338	0.000579	0.00365	-0.92	0.05	4.84136	-12.6834	SERPINA5|0.0698;PARK7|5.9704;SPINK1|0.0113;IGSF8|0.0973;HEXB|1.3804	5	139	185	38520	http://www.ebi.ac.uk/QuickGO/GTerm?id=GO:0007338	[]
10	9,10	cellular transition metal ion homeostasis	GO:0046916	0.000579	0.00365	-2.18	-0.08	4.84136	-12.6834	S100A9|0.0619;LTF|26.7917;LCN2|0.2208;SOD1|5.7016;S100A8|0.1644	5	139	185	38520	http://www.ebi.ac.uk/QuickGO/GTerm?id=GO:0046916	[]
4	4	single-organism biosynthetic process	GO:0044711	0.000581	0.00366	14.9	1.6	4.84136	-12.6834	PKM|4.9659;ALDOA|2.9923;LUM|0.2421;MDH1|2.7542;DDT|4.5709;CNDP2|2.6303;AQP1|0.0133;PGK1|2.0324;BGN|0.1995;FABP5|0.0296;PARK7|5.9704;EGF|0.7943;TPI1|2.0893;GAPDH|2.2699;BHMT|0.8166;SORD|13.1826;SOD1|5.7016;APOE|0.5105;APOA1|10.8643;C3|1.3804;HEXB|1.3804;APOA4|3.2211;GGT1|5.0582;IDH1|6.9183	24	2413	185	38520	http://www.ebi.ac.uk/QuickGO/GTerm?id=GO:0044711	[]
5	5	response to light stimulus	GO:0009416	0.000583	0.00366	0.23	0.16	4.84136	-12.6834	MME|2.2284;SERPINB13|0.3373;AQP1|0.0133;LRP2|0.1459;CAT|22.4905;APOE|0.5105;APOA1|10.8643;APOA4|3.2211	8	385	185	38520	http://www.ebi.ac.uk/QuickGO/GTerm?id=GO:0009416	[]
6	4,5,6	natural killer cell activation involved in immune response	GO:0002323	0.000584	0.00366	-0.42	0.09	4.84136	-12.6834	PGLYRP1|0.1722;PGLYRP2|0.3945;LAMP1|2.6062	3	34	185	38520	http://www.ebi.ac.uk/QuickGO/GTerm?id=GO:0002323	[]
6	5,6	negative regulation of interferon-gamma production	GO:0032689	0.000584	0.00366	-0.93	0.04	4.84136	-12.6834	PGLYRP1|0.1722;PGLYRP2|0.3945;SCGB1A1|8.5507	3	34	185	38520	http://www.ebi.ac.uk/QuickGO/GTerm?id=GO:0032689	[]
3	3	locomotory behavior	GO:0007626	0.000587	0.00367	2.52	0.38	4.84136	-12.6834	GAA|0.6026;DPP4|2.3335;PARK7|5.9704;SOD1|5.7016;HEXB|1.3804;NAGLU|0.5546	6	212	185	38520	http://www.ebi.ac.uk/QuickGO/GTerm?id=GO:0007626	[]
6	6	regulation of steroid metabolic process	GO:0019218	0.000613	0.00382	2.59	0.39	4.84136	-12.6834	SOD1|5.7016;APOE|0.5105;APOA1|10.8643;APOA4|3.2211	4	80	185	38520	http://www.ebi.ac.uk/QuickGO/GTerm?id=GO:0019218	[]
5	5	regulation of lipid metabolic process	GO:0019216	0.000629	0.00389	4.04	0.53	4.84136	-12.6834	SERPINA3|0.3436;SOD1|5.7016;APOE|0.5105;APOA1|10.8643;C3|1.3804;APOA4|3.2211;IDH1|6.9183	7	298	185	38520	http://www.ebi.ac.uk/QuickGO/GTerm?id=GO:0019216	[]
11	5,6,10,11	sequestering of zinc ion	GO:0032119	0.00063	0.00389	-1.99	-0.06	4.84136	-12.6834	S100A9|0.0619;S100A8|0.1644	2	8	185	38520	http://www.ebi.ac.uk/QuickGO/GTerm?id=GO:0032119	[]
6	6	positive regulation of triglyceride catabolic process	GO:0010898	0.00063	0.00389	1.54	0.29	4.84136	-12.6834	APOA1|10.8643;APOA4|3.2211	2	8	185	38520	http://www.ebi.ac.uk/QuickGO/GTerm?id=GO:0010898	[]
6	5,6	cell-cell adhesion involved in gastrulation	GO:0070586	0.00063	0.00389	-0.47	0.09	4.84136	-12.6834	IL1RN|0.2729;APOA1|10.8643	2	8	185	38520	http://www.ebi.ac.uk/QuickGO/GTerm?id=GO:0070586	[]
8	8	ganglioside catabolic process	GO:0006689	0.00063	0.00389	0.08	0.14	4.84136	-12.6834	HEXB|1.3804;NEU1|0.597	2	8	185	38520	http://www.ebi.ac.uk/QuickGO/GTerm?id=GO:0006689	[]
8	4,6,8	positive regulation of early endosome to late endosome transport	GO:2000643	0.00063	0.00389	0.79	0.21	4.84136	-12.6834	MSN|3.9084;RDX|1.5704	2	8	185	38520	http://www.ebi.ac.uk/QuickGO/GTerm?id=GO:2000643	[]
5	5	peptide metabolic process	GO:0006518	0.000641	0.00396	10.73	1.19	4.84136	-12.6834	MME|2.2284;CPQ|0.3565;S100A9|0.0619;CNDP2|2.6303;PGLYRP2|0.3945;ACE|8.2414;HSPB1|0.3837;CTSH|0.4699;APEH|1.7061;GAPDH|2.2699;SOD1|5.7016;APOE|0.5105;GLO1|4.4463;MMP7|0.0817;GGT1|5.0582;CPE|21.0863;IDH1|6.9183	17	1445	185	38520	http://www.ebi.ac.uk/QuickGO/GTerm?id=GO:0006518	[]
5	5	T cell activation	GO:0042110	0.000648	0.00399	6.88	0.81	4.84136	-12.6834	GSN|0.0718;DPP4|2.3335;LCP1|3.5645;VCAM1|9.4624;SPINK5|0.1406;HLA-DRA|1.406;IGFBP2|0.0698;SOD1|5.7016;SCGB1A1|8.5507	9	490	185	38520	http://www.ebi.ac.uk/QuickGO/GTerm?id=GO:0042110	[]
4	4	T cell aggregation	GO:0070489	0.000648	0.00399	6.88	0.81	4.84136	-12.6834	GSN|0.0718;DPP4|2.3335;LCP1|3.5645;VCAM1|9.4624;SPINK5|0.1406;HLA-DRA|1.406;IGFBP2|0.0698;SOD1|5.7016;SCGB1A1|8.5507	9	490	185	38520	http://www.ebi.ac.uk/QuickGO/GTerm?id=GO:0070489	[]
6	6	oxidoreduction coenzyme metabolic process	GO:0006733	0.000654	0.00401	3.44	0.47	4.84136	-12.6834	PKM|4.9659;ALDOA|2.9923;MDH1|2.7542;PGK1|2.0324;TPI1|2.0893;GAPDH|2.2699;IDH1|6.9183	7	300	185	38520	http://www.ebi.ac.uk/QuickGO/GTerm?id=GO:0006733	[]
4	4	response to oxygen levels	GO:0070482	0.000654	0.00401	3.52	0.48	4.84136	-12.6834	PKM|4.9659;DPP4|2.3335;AQP1|0.0133;CRYAB|0.2333;VASN|0.0982;CAT|22.4905;SOD3|8.7902	7	300	185	38520	http://www.ebi.ac.uk/QuickGO/GTerm?id=GO:0070482	[]
8	7,8	lymphocyte aggregation	GO:0071593	0.000658	0.00402	6.88	0.81	4.84136	-12.6834	GSN|0.0718;DPP4|2.3335;LCP1|3.5645;VCAM1|9.4624;SPINK5|0.1406;HLA-DRA|1.406;IGFBP2|0.0698;SOD1|5.7016;SCGB1A1|8.5507	9	491	185	38520	http://www.ebi.ac.uk/QuickGO/GTerm?id=GO:0071593	[]
4	4	lipid metabolic process	GO:0006629	0.000669	0.00409	-12.58	-1.1	4.84136	-12.6834	PRDX6|8.9536;FABP5|0.0296;SERPINA6|0.3873;SERPINA3|0.3436;CUBN|0.1067;CTSA|0.4571;GLB1|0.52;LRP2|0.1459;CAT|22.4905;SOD1|5.7016;IL1RN|0.2729;APOE|0.5105;APOA1|10.8643;C3|1.3804;ARSA|0.5754;HEXB|1.3804;APOA4|3.2211;GGT1|5.0582;NEU1|0.597;IDH1|6.9183	20	1861	185	38520	http://www.ebi.ac.uk/QuickGO/GTerm?id=GO:0006629	[]
4	4	negative regulation of cell adhesion	GO:0007162	0.000679	0.00413	-3.8	-0.24	4.84136	-12.6834	CDH1|0.8091;CDH13|0.1706;IL1RN|0.2729;APOA1|10.8643;PLG|0.3908;SCGB1A1|8.5507	6	218	185	38520	http://www.ebi.ac.uk/QuickGO/GTerm?id=GO:0007162	[]
4	4	tissue remodeling	GO:0048771	0.000679	0.00413	-1.86	-0.05	4.84136	-12.6834	ACE|8.2414;BGN|0.1995;SPP1|0.1738;CA2|8.7096;PLG|0.3908	5	144	185	38520	http://www.ebi.ac.uk/QuickGO/GTerm?id=GO:0048771	[]
4	4	symbiosis, encompassing mutualism through parasitism	GO:0044403	0.000688	0.00418	5.9	0.72	4.84136	-12.6834	GSN|0.0718;PDCD6IP|2.0701;DPP4|2.3335;PGLYRP1|0.1722;LTF|26.7917;PGLYRP2|0.3945;VCAM1|9.4624;AQP1|0.0133;SERPINB3|0.0377;HSPA8|2.3988;HLA-DRA|1.406;LAMP1|2.6062;APOE|0.5105	13	944	185	38520	http://www.ebi.ac.uk/QuickGO/GTerm?id=GO:0044403	[]
3	3	interspecies interaction between organisms	GO:0044419	0.000688	0.00418	5.9	0.72	4.84136	-12.6834	GSN|0.0718;PDCD6IP|2.0701;DPP4|2.3335;PGLYRP1|0.1722;LTF|26.7917;PGLYRP2|0.3945;VCAM1|9.4624;AQP1|0.0133;SERPINB3|0.0377;HSPA8|2.3988;HLA-DRA|1.406;LAMP1|2.6062;APOE|0.5105	13	944	185	38520	http://www.ebi.ac.uk/QuickGO/GTerm?id=GO:0044419	[]
6	4,6	plasma lipoprotein particle organization	GO:0071827	0.000692	0.00419	0.29	0.16	4.84136	-12.6834	APOE|0.5105;APOA1|10.8643;APOA4|3.2211	3	36	185	38520	http://www.ebi.ac.uk/QuickGO/GTerm?id=GO:0071827	[]
7	5,6,7	positive regulation of reactive oxygen species metabolic process	GO:2000379	0.000704	0.00426	2.15	0.35	4.84136	-12.6834	HBB|1.6749;HSP90AA1|2.466;PARK7|5.9704;SOD1|5.7016	4	83	185	38520	http://www.ebi.ac.uk/QuickGO/GTerm?id=GO:2000379	[]
4	4	regulation of cellular component size	GO:0032535	0.000748	0.00451	-1.76	-0.04	4.84136	-12.6834	GSN|0.0718;MSN|3.9084;AQP1|0.0133;RDX|1.5704;SPP1|0.1738;FN1|2.3988;SLC9A3R1|3.8726;APOE|0.5105;SH3BGRL3|0.0409	9	500	185	38520	http://www.ebi.ac.uk/QuickGO/GTerm?id=GO:0032535	[]
7	4,7	peptide hormone processing	GO:0016486	0.000751	0.00453	2.59	0.39	4.84136	-12.6834	MME|2.2284;ACE|8.2414;CPE|21.0863	3	37	185	38520	http://www.ebi.ac.uk/QuickGO/GTerm?id=GO:0016486	[]
5	4,5	negative regulation of cellular component movement	GO:0051271	0.000764	0.0046	-1.91	-0.05	4.84136	-12.6834	KRT16|0.1995;SEMG1|41.6869;SLC9A3R1|3.8726;TIMP1|18.197;IL1RN|0.2729;APOE|0.5105	6	223	185	38520	http://www.ebi.ac.uk/QuickGO/GTerm?id=GO:0051271	[]
8	7,8	protein heterooligomerization	GO:0051291	0.00077	0.00463	2.55	0.39	4.84136	-12.6834	SEMG1|41.6869;HBB|1.6749;COL6A1|0.3162;HBA1|1.5996	4	85	185	38520	http://www.ebi.ac.uk/QuickGO/GTerm?id=GO:0051291	[]
5	5	nervous system development	GO:0007399	0.000789	0.00473	-18.31	-1.66	4.84136	-12.6834	PCDH1|0.4285;HSP90AA1|2.466;GSN|0.0718;VTN|0.0809;COL6A1|0.3162;AQP1|0.0133;CKB|15.1356;HSPA8|2.3988;EGF|0.7943;SPINK5|0.1406;CDH1|0.8091;SPP1|0.1738;FN1|2.3988;SLC9A3R1|3.8726;LRP2|0.1459;SERPINI1|12.1339;SOD1|5.7016;APOE|0.5105;APOA1|10.8643;IGSF8|0.0973;HEXB|1.3804;CDH11|0.3105;APOA4|3.2211;NEU1|0.597;NAGLU|0.5546;KLK6|0.0112	26	2767	185	38520	http://www.ebi.ac.uk/QuickGO/GTerm?id=GO:0007399	[]
7	5,6,7	MAPK cascade	GO:0000165	0.000795	0.00476	-3.36	-0.2	4.84136	-12.6834	CTSH|0.4699;SERPINB3|0.0377;EGF|0.7943;TFF2|0.2655;CRYAB|0.2333;FN1|2.3988;SLC9A3R1|3.8726;PRDX1|2.9107;SOD1|5.7016;IL1RN|0.2729;APOE|0.5105;APOA1|10.8643;C3|1.3804	13	959	185	38520	http://www.ebi.ac.uk/QuickGO/GTerm?id=GO:0000165	[]
6	4,5,6	disaccharide metabolic process	GO:0005984	0.000808	0.00479	-0.33	0.1	4.84136	-12.6834	GAA|0.6026;MGAM|3.5318	2	9	185	38520	http://www.ebi.ac.uk/QuickGO/GTerm?id=GO:0005984	[]
9	7,8,9	establishment of epithelial cell apical/basal polarity	GO:0045198	0.000808	0.00479	1.18	0.25	4.84136	-12.6834	MSN|3.9084;SLC9A3R1|3.8726	2	9	185	38520	http://www.ebi.ac.uk/QuickGO/GTerm?id=GO:0045198	[]
8	6,7,8	regulation of intestinal cholesterol absorption	GO:0030300	0.000808	0.00479	1.54	0.29	4.84136	-12.6834	APOA1|10.8643;APOA4|3.2211	2	9	185	38520	http://www.ebi.ac.uk/QuickGO/GTerm?id=GO:0030300	[]
6	5,6	complement activation, lectin pathway	GO:0001867	0.000808	0.00479	-1.01	0.04	4.84136	-12.6834	MASP2|0.4446;A2M|22.9087	2	9	185	38520	http://www.ebi.ac.uk/QuickGO/GTerm?id=GO:0001867	[]
7	5,6,7	regulation of intestinal absorption	GO:1904478	0.000808	0.00479	1.54	0.29	4.84136	-12.6834	APOA1|10.8643;APOA4|3.2211	2	9	185	38520	http://www.ebi.ac.uk/QuickGO/GTerm?id=GO:1904478	[]
6	5,6	high-density lipoprotein particle clearance	GO:0034384	0.000808	0.00479	-0.74	0.06	4.84136	-12.6834	APOE|0.5105;APOA1|10.8643	2	9	185	38520	http://www.ebi.ac.uk/QuickGO/GTerm?id=GO:0034384	[]
4	4	cellular aldehyde metabolic process	GO:0006081	0.00084	0.00497	2.58	0.39	4.84136	-12.6834	PARK7|5.9704;TPI1|2.0893;GLO1|4.4463;IDH1|6.9183	4	87	185	38520	http://www.ebi.ac.uk/QuickGO/GTerm?id=GO:0006081	[]
4	4	reactive oxygen species biosynthetic process	GO:1903409	0.00084	0.00497	2.15	0.35	4.84136	-12.6834	HBB|1.6749;HSP90AA1|2.466;PARK7|5.9704;SOD1|5.7016	4	87	185	38520	http://www.ebi.ac.uk/QuickGO/GTerm?id=GO:1903409	[]
6	5,6	cell morphogenesis involved in differentiation	GO:0000904	0.000842	0.00497	4.49	0.58	4.84136	-12.6834	HSP90AA1|2.466;OLFM4|10.7647;COL6A1|0.3162;SERPINB3|0.0377;HSPA8|2.3988;SPP1|0.1738;FN1|2.3988;SLC9A3R1|3.8726;VASN|0.0982;SOD1|5.7016;APOE|0.5105;APOA1|10.8643;CDH11|0.3105	13	965	185	38520	http://www.ebi.ac.uk/QuickGO/GTerm?id=GO:0000904	[]
3	3	positive regulation of cellular protein localization	GO:1903829	0.000853	0.00503	3.26	0.46	4.84136	-12.6834	PDZK1|11.695;MSN|3.9084;RDX|1.5704;PARK7|5.9704;YWHAZ|2.704;EGF|0.7943;CDH1|0.8091	7	314	185	38520	http://www.ebi.ac.uk/QuickGO/GTerm?id=GO:1903829	[]
7	5,6,7	positive regulation of macroautophagy	GO:0016239	0.000866	0.0051	1.07	0.24	4.84136	-12.6834	MYLK|0.7516;MDH1|2.7542;PARK7|5.9704;ANXA5|14.0605;KRT6A|0.1127	5	152	185	38520	http://www.ebi.ac.uk/QuickGO/GTerm?id=GO:0016239	[]
8	8	retinoid metabolic process	GO:0001523	0.000877	0.00514	-0.42	0.09	4.84136	-12.6834	LRP2|0.1459;APOE|0.5105;APOA1|10.8643;APOA4|3.2211	4	88	185	38520	http://www.ebi.ac.uk/QuickGO/GTerm?id=GO:0001523	[]
5	5	protein-lipid complex subunit organization	GO:0071825	0.000877	0.00514	0.29	0.16	4.84136	-12.6834	APOE|0.5105;APOA1|10.8643;APOA4|3.2211	3	39	185	38520	http://www.ebi.ac.uk/QuickGO/GTerm?id=GO:0071825	[]
5	5	glycolytic process	GO:0006096	0.000892	0.00522	2.16	0.35	4.84136	-12.6834	PKM|4.9659;ALDOA|2.9923;PGK1|2.0324;TPI1|2.0893;GAPDH|2.2699	5	153	185	38520	http://www.ebi.ac.uk/QuickGO/GTerm?id=GO:0006096	[]
4	4	cellular response to stress	GO:0033554	0.000898	0.00525	11.51	1.27	4.84136	-12.6834	UBA1|0.0107;HSP90AA1|2.466;MYLK|0.7516;MDH1|2.7542;HSPB1|0.3837;AQP1|0.0133;SERPINB3|0.0377;PARK7|5.9704;HP|34.3558;HSPA8|2.3988;CRYAB|0.2333;DSC2|0.118;AOC1|2.0701;SPP1|0.1738;PRDX2|57.0164;SHISA5|0.2704;PRDX1|2.9107;CA2|8.7096;VASN|0.0982;SOD1|5.7016;IL1RN|0.2729;APOE|0.5105;ANXA5|14.0605;APOA1|10.8643;KRT6A|0.1127;APOA4|3.2211;SOD3|8.7902	27	2945	185	38520	http://www.ebi.ac.uk/QuickGO/GTerm?id=GO:0033554	[]
4	4	embryonic morphogenesis	GO:0048598	0.0009	0.00525	-6.63	-0.52	4.84136	-12.6834	VTN|0.0809;COL6A1|0.3162;FOLR1|0.2188;FN1|2.3988;SLC9A3R1|3.8726;FBN1|0.1585;SOD1|5.7016;IL1RN|0.2729;APOA1|10.8643;NAGLU|0.5546	10	621	185	38520	http://www.ebi.ac.uk/QuickGO/GTerm?id=GO:0048598	[]
6	6	regulation of cell morphogenesis involved in differentiation	GO:0010769	0.000902	0.00526	-2.45	-0.11	4.84136	-12.6834	OLFM4|10.7647;SERPINB3|0.0377;SPP1|0.1738;FN1|2.3988;VASN|0.0982;APOE|0.5105;APOA1|10.8643	7	317	185	38520	http://www.ebi.ac.uk/QuickGO/GTerm?id=GO:0010769	[]
10	8,9,10	ATP generation from ADP	GO:0006757	0.000918	0.00534	2.16	0.35	4.84136	-12.6834	PKM|4.9659;ALDOA|2.9923;PGK1|2.0324;TPI1|2.0893;GAPDH|2.2699	5	154	185	38520	http://www.ebi.ac.uk/QuickGO/GTerm?id=GO:0006757	[]
6	5,6	neuron development	GO:0048666	0.000936	0.00544	-4.04	-0.26	4.84136	-12.6834	HSP90AA1|2.466;COL6A1|0.3162;HSPA8|2.3988;CDH1|0.8091;SPP1|0.1738;FN1|2.3988;SLC9A3R1|3.8726;SOD1|5.7016;APOE|0.5105;APOA1|10.8643;CDH11|0.3105;APOA4|3.2211;NEU1|0.597;NAGLU|0.5546;KLK6|0.0112	15	1230	185	38520	http://www.ebi.ac.uk/QuickGO/GTerm?id=GO:0048666	[]
5	5	purine-containing compound metabolic process	GO:0072521	0.000938	0.00544	8.73	0.99	4.84136	-12.6834	PKM|4.9659;ALDOA|2.9923;AQP1|0.0133;PGK1|2.0324;PARK7|5.9704;HSPA8|2.3988;TPI1|2.0893;GAPDH|2.2699;BHMT|0.8166;ACPP|64.2688;CAT|22.4905;APOE|0.5105	12	855	185	38520	http://www.ebi.ac.uk/QuickGO/GTerm?id=GO:0072521	[]
6	6	modified amino acid transport	GO:0072337	0.000945	0.00547	-0.59	0.08	4.84136	-12.6834	FOLR1|0.2188;SLC9A3R1|3.8726;SERPINA7|0.2188	3	40	185	38520	http://www.ebi.ac.uk/QuickGO/GTerm?id=GO:0072337	[]
6	4,6	regulation of epithelial cell migration	GO:0010632	0.000945	0.00547	-4.3	-0.29	4.84136	-12.6834	HSPB1|0.3837;CTSH|0.4699;AQP1|0.0133;APOE|0.5105;SH3BGRL3|0.0409	5	155	185	38520	http://www.ebi.ac.uk/QuickGO/GTerm?id=GO:0010632	[]
4	3,4	regulation of metabolic process	GO:0019222	0.000952	0.0055	-53.9	-5.16	4.84136	-12.6834	SEMG1|41.6869;CST6|0.0614;CTSB|0.3105;CD14|0.8241;HBB|1.6749;HSP90AA1|2.466;MME|2.2284;CSTA|0.177;GSN|0.0718;LUM|0.2421;MSN|3.9084;MYLK|0.7516;MDH1|2.7542;SERPINC1|0.6026;S100A9|0.0619;VTN|0.0809;LTF|26.7917;SERPINB13|0.3373;AHSG|0.1432;CTSC|0.3076;ACE|8.2414;HSPB1|0.3837;CTSH|0.4699;AQP1|0.0133;PRG4|0.3631;AHNAK|0.0643;RDX|1.5704;SERPINB3|0.0377;SERPINA5|0.0698;PARK7|5.9704;HP|34.3558;A2ML1|0.21…	75	11404	185	38520	http://www.ebi.ac.uk/QuickGO/GTerm?id=GO:0019222	[]
7	6,7	cellular ion homeostasis	GO:0006873	0.000968	0.00558	7.97	0.92	4.84136	-12.6834	S100A9|0.0619;LTF|26.7917;CKB|15.1356;LCN2|0.2208;SLC9A3R1|3.8726;CA2|8.7096;SOD1|5.7016;APOE|0.5105;S100A8|0.1644;HEXB|1.3804	10	627	185	38520	http://www.ebi.ac.uk/QuickGO/GTerm?id=GO:0006873	[]
6	6	neutrophil migration	GO:1990266	0.000994	0.00572	-3.78	-0.24	4.84136	-12.6834	S100A9|0.0619;OLFM4|10.7647;SPP1|0.1738;S100A8|0.1644	4	91	185	38520	http://www.ebi.ac.uk/QuickGO/GTerm?id=GO:1990266	[]
5	5	response to peptide hormone	GO:0043434	0.000997	0.00572	-6.58	-0.51	4.84136	-12.6834	CTSB|0.3105;PKM|4.9659;AHSG|0.1432;GGH|0.492;FBN1|0.1585;PTPRN|0.7047;CAT|22.4905;SERPINA7|0.2188;TIMP1|18.197	9	521	185	38520	http://www.ebi.ac.uk/QuickGO/GTerm?id=GO:0043434	[]
6	5,6	positive regulation of response to extracellular stimulus	GO:0032106	0.001	0.00572	1.07	0.24	4.84136	-12.6834	MYLK|0.7516;MDH1|2.7542;PARK7|5.9704;ANXA5|14.0605;KRT6A|0.1127	5	157	185	38520	http://www.ebi.ac.uk/QuickGO/GTerm?id=GO:0032106	[]
7	6,7	positive regulation of response to nutrient levels	GO:0032109	0.001	0.00572	1.07	0.24	4.84136	-12.6834	MYLK|0.7516;MDH1|2.7542;PARK7|5.9704;ANXA5|14.0605;KRT6A|0.1127	5	157	185	38520	http://www.ebi.ac.uk/QuickGO/GTerm?id=GO:0032109	[]
9	6,8,9	negative regulation of calcium ion import	GO:0090281	0.00101	0.00572	0.33	0.17	4.84136	-12.6834	SEMG1|41.6869;SPINK1|0.0113	2	10	185	38520	http://www.ebi.ac.uk/QuickGO/GTerm?id=GO:0090281	[]
7	5,6,7	regulation of integrin-mediated signaling pathway	GO:2001044	0.00101	0.00572	2.02	0.33	4.84136	-12.6834	CD63|5.7016;TIMP1|18.197	2	10	185	38520	http://www.ebi.ac.uk/QuickGO/GTerm?id=GO:2001044	[]
6	5,6	positive regulation of oxidative stress-induced cell death	GO:1903209	0.00101	0.00572	1.53	0.29	4.84136	-12.6834	PARK7|5.9704;SOD1|5.7016	2	10	185	38520	http://www.ebi.ac.uk/QuickGO/GTerm?id=GO:1903209	[]
8	5,6,7,8	regulation of podosome assembly	GO:0071801	0.00101	0.00572	0.59	0.19	4.84136	-12.6834	GSN|0.0718;LCP1|3.5645	2	10	185	38520	http://www.ebi.ac.uk/QuickGO/GTerm?id=GO:0071801	[]
8	7,8	regulation of apoptotic cell clearance	GO:2000425	0.00101	0.00572	0.32	0.17	4.84136	-12.6834	C3|1.3804;C4A|0.3467	2	10	185	38520	http://www.ebi.ac.uk/QuickGO/GTerm?id=GO:2000425	[]
6	6	glycolipid metabolic process	GO:0006664	0.00103	0.00585	-1.23	0.01	4.84136	-12.6834	CTSA|0.4571;GLB1|0.52;ARSA|0.5754;HEXB|1.3804;NEU1|0.597	5	158	185	38520	http://www.ebi.ac.uk/QuickGO/GTerm?id=GO:0006664	[]
5	5	regulation of lipid transport	GO:0032368	0.00104	0.00587	-1.15	0.02	4.84136	-12.6834	EGF|0.7943;APOE|0.5105;APOA1|10.8643;APOA4|3.2211	4	92	185	38520	http://www.ebi.ac.uk/QuickGO/GTerm?id=GO:0032368	[]
7	7	purine ribonucleoside metabolic process	GO:0046128	0.00105	0.00595	5.21	0.65	4.84136	-12.6834	PKM|4.9659;ALDOA|2.9923;PGK1|2.0324;PARK7|5.9704;HSPA8|2.3988;TPI1|2.0893;GAPDH|2.2699;BHMT|0.8166;ACPP|64.2688	9	525	185	38520	http://www.ebi.ac.uk/QuickGO/GTerm?id=GO:0046128	[]
6	4,5,6	positive regulation of macromolecule metabolic process	GO:0010604	0.00107	0.00603	-19.43	-1.77	4.84136	-12.6834	SEMG1|41.6869;CD14|0.8241;GSN|0.0718;LUM|0.2421;MSN|3.9084;S100A9|0.0619;VTN|0.0809;LTF|26.7917;CTSC|0.3076;ACE|8.2414;HSPB1|0.3837;CTSH|0.4699;RDX|1.5704;SERPINB3|0.0377;PARK7|5.9704;HSPA8|2.3988;EGF|0.7943;TFF2|0.2655;CDH1|0.8091;CDH13|0.1706;FN1|2.3988;CD63|5.7016;CAT|22.4905;SOD1|5.7016;IL1RN|0.2729;APOE|0.5105;S100A8|0.1644;C3|1.3804;HEXB|1.3804	29	3292	185	38520	http://www.ebi.ac.uk/QuickGO/GTerm?id=GO:0010604	[]
7	7	diterpenoid metabolic process	GO:0016101	0.00108	0.00606	-0.42	0.09	4.84136	-12.6834	LRP2|0.1459;APOE|0.5105;APOA1|10.8643;APOA4|3.2211	4	93	185	38520	http://www.ebi.ac.uk/QuickGO/GTerm?id=GO:0016101	[]
4	3,4	modification of morphology or physiology of other organism	GO:0035821	0.00108	0.00606	0.05	0.14	4.84136	-12.6834	LTF|26.7917;AQP1|0.0133;DCD|4.9204;APOE|0.5105	4	93	185	38520	http://www.ebi.ac.uk/QuickGO/GTerm?id=GO:0035821	[]
3	3	leukocyte mediated cytotoxicity	GO:0001909	0.00108	0.00606	-0.04	0.13	4.84136	-12.6834	CTSC|0.3076;CTSH|0.4699;PRDX1|2.9107;LAMP1|2.6062	4	93	185	38520	http://www.ebi.ac.uk/QuickGO/GTerm?id=GO:0001909	[]
6	6	purine nucleoside metabolic process	GO:0042278	0.00109	0.00614	5.21	0.65	4.84136	-12.6834	PKM|4.9659;ALDOA|2.9923;PGK1|2.0324;PARK7|5.9704;HSPA8|2.3988;TPI1|2.0893;GAPDH|2.2699;BHMT|0.8166;ACPP|64.2688	9	528	185	38520	http://www.ebi.ac.uk/QuickGO/GTerm?id=GO:0042278	[]
6	4,6	regulation of hemopoiesis	GO:1903706	0.0011	0.00616	2.02	0.33	4.84136	-12.6834	PGLYRP1|0.1722;LTF|26.7917;PGLYRP2|0.3945;ACE|8.2414;SPINK5|0.1406;CA2|8.7096;SOD1|5.7016	7	328	185	38520	http://www.ebi.ac.uk/QuickGO/GTerm?id=GO:1903706	[]
5	5	liposaccharide metabolic process	GO:1903509	0.00112	0.00626	-1.23	0.01	4.84136	-12.6834	CTSA|0.4571;GLB1|0.52;ARSA|0.5754;HEXB|1.3804;NEU1|0.597	5	161	185	38520	http://www.ebi.ac.uk/QuickGO/GTerm?id=GO:1903509	[]
5	5	regulation of oxidoreductase activity	GO:0051341	0.00112	0.00626	3	0.43	4.84136	-12.6834	HSP90AA1|2.466;PARK7|5.9704;HP|34.3558;APOE|0.5105	4	94	185	38520	http://www.ebi.ac.uk/QuickGO/GTerm?id=GO:0051341	[]
7	6,7	phototransduction, visible light	GO:0007603	0.00112	0.00626	-0.42	0.09	4.84136	-12.6834	LRP2|0.1459;APOE|0.5105;APOA1|10.8643;APOA4|3.2211	4	94	185	38520	http://www.ebi.ac.uk/QuickGO/GTerm?id=GO:0007603	[]
5	5	small molecule biosynthetic process	GO:0044283	0.00113	0.00629	7.08	0.83	4.84136	-12.6834	PKM|4.9659;BGN|0.1995;FABP5|0.0296;PARK7|5.9704;BHMT|0.8166;SOD1|5.7016;APOE|0.5105;APOA1|10.8643;APOA4|3.2211;GGT1|5.0582	10	640	185	38520	http://www.ebi.ac.uk/QuickGO/GTerm?id=GO:0044283	[]
4	4	lipid localization	GO:0010876	0.00115	0.00641	4.88	0.61	4.84136	-12.6834	ACE|8.2414;SERPINA5|0.0698;EGF|0.7943;SLC9A3R1|3.8726;APOE|0.5105;APOA1|10.8643;C3|1.3804;HEXB|1.3804;APOA4|3.2211	9	532	185	38520	http://www.ebi.ac.uk/QuickGO/GTerm?id=GO:0010876	[]
5	5	positive regulation of reactive oxygen species biosynthetic process	GO:1903428	0.00117	0.00648	1.39	0.27	4.84136	-12.6834	HBB|1.6749;HSP90AA1|2.466;PARK7|5.9704	3	43	185	38520	http://www.ebi.ac.uk/QuickGO/GTerm?id=GO:1903428	[]
4	4	generation of precursor metabolites and energy	GO:0006091	0.00117	0.00648	5.78	0.7	4.84136	-12.6834	PKM|4.9659;GAA|0.6026;ALDOA|2.9923;MDH1|2.7542;PGK1|2.0324;PARK7|5.9704;TPI1|2.0893;GAPDH|2.2699;CAT|22.4905;IDH1|6.9183	10	643	185	38520	http://www.ebi.ac.uk/QuickGO/GTerm?id=GO:0006091	[]
5	5	coenzyme metabolic process	GO:0006732	0.00118	0.00655	4.18	0.55	4.84136	-12.6834	PKM|4.9659;ALDOA|2.9923;MDH1|2.7542;PGK1|2.0324;FOLR1|0.2188;TPI1|2.0893;GAPDH|2.2699;BHMT|0.8166;IDH1|6.9183	9	534	185	38520	http://www.ebi.ac.uk/QuickGO/GTerm?id=GO:0006732	[]
9	8,9	ADP metabolic process	GO:0046031	0.00122	0.0067	2.16	0.35	4.84136	-12.6834	PKM|4.9659;ALDOA|2.9923;PGK1|2.0324;TPI1|2.0893;GAPDH|2.2699	5	164	185	38520	http://www.ebi.ac.uk/QuickGO/GTerm?id=GO:0046031	[]
8	8	peptidoglycan catabolic process	GO:0009253	0.00123	0.0067	-1.17	0.02	4.84136	-12.6834	PGLYRP1|0.1722;PGLYRP2|0.3945	2	11	185	38520	http://www.ebi.ac.uk/QuickGO/GTerm?id=GO:0009253	[]
6	6	response to phenylpropanoid	GO:0080184	0.00123	0.0067	1.86	0.32	4.84136	-12.6834	CAT|22.4905;APOA4|3.2211	2	11	185	38520	http://www.ebi.ac.uk/QuickGO/GTerm?id=GO:0080184	[]
9	8,9	cellular monovalent inorganic anion homeostasis	GO:0030320	0.00123	0.0067	1.77	0.31	4.84136	-12.6834	CKB|15.1356;SLC9A3R1|3.8726	2	11	185	38520	http://www.ebi.ac.uk/QuickGO/GTerm?id=GO:0030320	[]
8	8	positive regulation of lipoprotein lipase activity	GO:0051006	0.00123	0.0067	1.54	0.29	4.84136	-12.6834	APOA1|10.8643;APOA4|3.2211	2	11	185	38520	http://www.ebi.ac.uk/QuickGO/GTerm?id=GO:0051006	[]
4	4	leukocyte migration involved in inflammatory response	GO:0002523	0.00123	0.0067	-1.99	-0.06	4.84136	-12.6834	S100A9|0.0619;S100A8|0.1644	2	11	185	38520	http://www.ebi.ac.uk/QuickGO/GTerm?id=GO:0002523	[]
7	7	keratinocyte migration	GO:0051546	0.00123	0.0067	-0.42	0.09	4.84136	-12.6834	KRT16|0.1995;KRT2|13.0617	2	11	185	38520	http://www.ebi.ac.uk/QuickGO/GTerm?id=GO:0051546	[]
8	7,8	cellular anion homeostasis	GO:0030002	0.00123	0.0067	1.77	0.31	4.84136	-12.6834	CKB|15.1356;SLC9A3R1|3.8726	2	11	185	38520	http://www.ebi.ac.uk/QuickGO/GTerm?id=GO:0030002	[]
7	7	peptidoglycan metabolic process	GO:0000270	0.00123	0.0067	-1.17	0.02	4.84136	-12.6834	PGLYRP1|0.1722;PGLYRP2|0.3945	2	11	185	38520	http://www.ebi.ac.uk/QuickGO/GTerm?id=GO:0000270	[]
5	5	positive regulation of organelle organization	GO:0010638	0.00124	0.00678	7.02	0.83	4.84136	-12.6834	GSN|0.0718;PDCD6IP|2.0701;MYLK|0.7516;MDH1|2.7542;LCP1|3.5645;PARK7|5.9704;YWHAZ|2.704;EGF|0.7943;ANXA5|14.0605;APOA1|10.8643;KRT6A|0.1127	11	764	185	38520	http://www.ebi.ac.uk/QuickGO/GTerm?id=GO:0010638	[]
4	4	response to toxic substance	GO:0009636	0.00125	0.00678	3.29	0.46	4.84136	-12.6834	PARK7|5.9704;AOC1|2.0701;CDH1|0.8091;CAT|22.4905;SOD1|5.7016	5	165	185	38520	http://www.ebi.ac.uk/QuickGO/GTerm?id=GO:0009636	[]
4	4	response to heat	GO:0009408	0.00125	0.00678	1.43	0.28	4.84136	-12.6834	CD14|0.8241;HSP90AA1|2.466;HSPA8|2.3988;CRNN|0.0453;SOD1|5.7016	5	165	185	38520	http://www.ebi.ac.uk/QuickGO/GTerm?id=GO:0009408	[]
6	4,5,6	negative regulation of cell activation	GO:0050866	0.00125	0.00678	-2.97	-0.16	4.84136	-12.6834	PGLYRP1|0.1722;PGLYRP2|0.3945;TFF2|0.2655;APOE|0.5105;SCGB1A1|8.5507	5	165	185	38520	http://www.ebi.ac.uk/QuickGO/GTerm?id=GO:0050866	[]
7	7	monocarboxylic acid biosynthetic process	GO:0072330	0.00132	0.00716	4.42	0.57	4.84136	-12.6834	PKM|4.9659;BGN|0.1995;PARK7|5.9704;APOA1|10.8643;APOA4|3.2211;GGT1|5.0582	6	248	185	38520	http://www.ebi.ac.uk/QuickGO/GTerm?id=GO:0072330	[]
4	4	regulation of hormone levels	GO:0010817	0.00133	0.00719	-8.24	-0.67	4.84136	-12.6834	MME|2.2284;CPQ|0.3565;ACE|8.2414;AQP1|0.0133;PTPRN|0.7047;SERPINA7|0.2188;IL1RN|0.2729;CPE|21.0863;KLK6|0.0112	9	543	185	38520	http://www.ebi.ac.uk/QuickGO/GTerm?id=GO:0010817	[]
5	5	modification by host of symbiont morphology or physiology	GO:0051851	0.00133	0.00721	-1.43	0	4.84136	-12.6834	LTF|26.7917;AQP1|0.0133;APOE|0.5105	3	45	185	38520	http://www.ebi.ac.uk/QuickGO/GTerm?id=GO:0051851	[]
6	5,6	cell surface receptor signaling pathway	GO:0007166	0.00135	0.0073	-26.24	-2.44	4.84136	-12.6834	CD14|0.8241;HSP90AA1|2.466;P06314|0.0809;LRG1|0.8017;VTN|0.0809;LTF|26.7917;AHSG|0.1432;VCAM1|9.4624;HSPB1|0.3837;FOLR1|0.2188;PARK7|5.9704;EGF|0.7943;TFF2|0.2655;CDH13|0.1706;ACPP|64.2688;CD63|5.7016;SLC9A3R1|3.8726;LRP2|0.1459;FBN1|0.1585;PTPRN|0.7047;HLA-DRA|1.406;VASN|0.0982;IGFBP2|0.0698;P01594|0.0643;TIMP1|18.197;IL1RN|0.2729;APOA1|10.8643;IGHG3|0.2992;P01614|0.7727;P01616|0.0145;P01617|0.0…	32	3825	185	38520	http://www.ebi.ac.uk/QuickGO/GTerm?id=GO:0007166	[]
8	8	purine ribonucleoside diphosphate metabolic process	GO:0009179	0.00139	0.00748	2.16	0.35	4.84136	-12.6834	PKM|4.9659;ALDOA|2.9923;PGK1|2.0324;TPI1|2.0893;GAPDH|2.2699	5	169	185	38520	http://www.ebi.ac.uk/QuickGO/GTerm?id=GO:0009179	[]
7	7	purine nucleoside diphosphate metabolic process	GO:0009135	0.00139	0.00748	2.16	0.35	4.84136	-12.6834	PKM|4.9659;ALDOA|2.9923;PGK1|2.0324;TPI1|2.0893;GAPDH|2.2699	5	169	185	38520	http://www.ebi.ac.uk/QuickGO/GTerm?id=GO:0009135	[]
5	5	cell junction assembly	GO:0034329	0.0014	0.00754	-3.08	-0.17	4.84136	-12.6834	ACE|8.2414;KRT5|0.3802;CDH1|0.8091;CDH13|0.1706;FN1|2.3988;CDH11|0.3105	6	251	185	38520	http://www.ebi.ac.uk/QuickGO/GTerm?id=GO:0034329	[]
7	7	sensory perception of pain	GO:0019233	0.00141	0.00757	0.28	0.16	4.84136	-12.6834	MME|2.2284;AQP1|0.0133;ACPP|64.2688;IL1RN|0.2729	4	100	185	38520	http://www.ebi.ac.uk/QuickGO/GTerm?id=GO:0019233	[]
9	6,8,9	regulation of blood vessel endothelial cell migration	GO:0043535	0.00142	0.0076	-2.1	-0.07	4.84136	-12.6834	HSPB1|0.3837;APOE|0.5105;SH3BGRL3|0.0409	3	46	185	38520	http://www.ebi.ac.uk/QuickGO/GTerm?id=GO:0043535	[]
7	5,6,7	regulation of oxidative stress-induced cell death	GO:1903201	0.00142	0.0076	0.42	0.18	4.84136	-12.6834	HSPB1|0.3837;PARK7|5.9704;SOD1|5.7016	3	46	185	38520	http://www.ebi.ac.uk/QuickGO/GTerm?id=GO:1903201	[]
7	6,7	inner ear receptor cell development	GO:0060119	0.00142	0.0076	0.26	0.16	4.84136	-12.6834	SLC9A3R1|3.8726;SOD1|5.7016;NAGLU|0.5546	3	46	185	38520	http://www.ebi.ac.uk/QuickGO/GTerm?id=GO:0060119	[]
7	6,7	regulation of mitophagy	GO:1903146	0.00142	0.00761	1.07	0.24	4.84136	-12.6834	MYLK|0.7516;MDH1|2.7542;PARK7|5.9704;ANXA5|14.0605;KRT6A|0.1127	5	170	185	38520	http://www.ebi.ac.uk/QuickGO/GTerm?id=GO:1903146	[]
3	3	single organism reproductive process	GO:0044702	0.00146	0.00769	12.79	1.39	4.84136	-12.6834	CTSB|0.3105;ACE|8.2414;SERPINA5|0.0698;PARK7|5.9704;SPP1|0.1738;SPINK1|0.0113;TIMP1|18.197;SOD1|5.7016;IGSF8|0.0973;MMP7|0.0817;HEXB|1.3804;SCGB1A1|8.5507;GGT1|5.0582;IDH1|6.9183	14	1155	185	38520	http://www.ebi.ac.uk/QuickGO/GTerm?id=GO:0044702	[]
7	7	ribonucleoside diphosphate metabolic process	GO:0009185	0.00146	0.00769	2.16	0.35	4.84136	-12.6834	PKM|4.9659;ALDOA|2.9923;PGK1|2.0324;TPI1|2.0893;GAPDH|2.2699	5	171	185	38520	http://www.ebi.ac.uk/QuickGO/GTerm?id=GO:0009185	[]
5	5	Golgi localization	GO:0051645	0.00147	0.00769	1.02	0.24	4.84136	-12.6834	YWHAZ|2.704;SLC9A3R1|3.8726	2	12	185	38520	http://www.ebi.ac.uk/QuickGO/GTerm?id=GO:0051645	[]
7	7	establishment of apical/basal cell polarity	GO:0035089	0.00147	0.00769	1.18	0.25	4.84136	-12.6834	MSN|3.9084;SLC9A3R1|3.8726	2	12	185	38520	http://www.ebi.ac.uk/QuickGO/GTerm?id=GO:0035089	[]
10	5,6,8,10	angiotensin maturation	GO:0002003	0.00147	0.00769	1.26	0.26	4.84136	-12.6834	MME|2.2284;ACE|8.2414	2	12	185	38520	http://www.ebi.ac.uk/QuickGO/GTerm?id=GO:0002003	[]
7	6,7	regulation of triglyceride catabolic process	GO:0010896	0.00147	0.00769	1.54	0.29	4.84136	-12.6834	APOA1|10.8643;APOA4|3.2211	2	12	185	38520	http://www.ebi.ac.uk/QuickGO/GTerm?id=GO:0010896	[]
8	6,8	negative regulation of cholesterol transport	GO:0032375	0.00147	0.00769	-0.39	0.1	4.84136	-12.6834	EGF|0.7943;APOE|0.5105	2	12	185	38520	http://www.ebi.ac.uk/QuickGO/GTerm?id=GO:0032375	[]
7	5,7	negative regulation of sterol transport	GO:0032372	0.00147	0.00769	-0.39	0.1	4.84136	-12.6834	EGF|0.7943;APOE|0.5105	2	12	185	38520	http://www.ebi.ac.uk/QuickGO/GTerm?id=GO:0032372	[]
4	4	positive regulation of response to oxidative stress	GO:1902884	0.00147	0.00769	1.53	0.29	4.84136	-12.6834	PARK7|5.9704;SOD1|5.7016	2	12	185	38520	http://www.ebi.ac.uk/QuickGO/GTerm?id=GO:1902884	[]
6	4,5,6	positive regulation of cellular response to oxidative stress	GO:1900409	0.00147	0.00769	1.53	0.29	4.84136	-12.6834	PARK7|5.9704;SOD1|5.7016	2	12	185	38520	http://www.ebi.ac.uk/QuickGO/GTerm?id=GO:1900409	[]
6	6	cellular response to thyroid hormone stimulus	GO:0097067	0.00147	0.00769	-0.84	0.05	4.84136	-12.6834	CTSB|0.3105;CTSH|0.4699	2	12	185	38520	http://www.ebi.ac.uk/QuickGO/GTerm?id=GO:0097067	[]
6	6	auditory receptor cell stereocilium organization	GO:0060088	0.00147	0.00769	1.34	0.27	4.84136	-12.6834	SLC9A3R1|3.8726;SOD1|5.7016	2	12	185	38520	http://www.ebi.ac.uk/QuickGO/GTerm?id=GO:0060088	[]
8	7,8	positive regulation of triglyceride lipase activity	GO:0061365	0.00147	0.00769	1.54	0.29	4.84136	-12.6834	APOA1|10.8643;APOA4|3.2211	2	12	185	38520	http://www.ebi.ac.uk/QuickGO/GTerm?id=GO:0061365	[]
9	9	transition metal ion homeostasis	GO:0055076	0.0015	0.00785	-2.18	-0.08	4.84136	-12.6834	S100A9|0.0619;LTF|26.7917;LCN2|0.2208;SOD1|5.7016;S100A8|0.1644	5	172	185	38520	http://www.ebi.ac.uk/QuickGO/GTerm?id=GO:0055076	[]
6	6	endodermal cell differentiation	GO:0035987	0.00151	0.00789	-0.38	0.1	4.84136	-12.6834	VTN|0.0809;COL6A1|0.3162;FN1|2.3988	3	47	185	38520	http://www.ebi.ac.uk/QuickGO/GTerm?id=GO:0035987	[]
4	4	interaction with symbiont	GO:0051702	0.00151	0.00789	-1.43	0	4.84136	-12.6834	LTF|26.7917;AQP1|0.0133;APOE|0.5105	3	47	185	38520	http://www.ebi.ac.uk/QuickGO/GTerm?id=GO:0051702	[]
7	7	dicarboxylic acid metabolic process	GO:0043648	0.00152	0.0079	2.64	0.4	4.84136	-12.6834	MDH1|2.7542;FOLR1|0.2188;GGT1|5.0582;IDH1|6.9183	4	102	185	38520	http://www.ebi.ac.uk/QuickGO/GTerm?id=GO:0043648	[]
6	5,6	cellular chemical homeostasis	GO:0055082	0.00154	0.00802	4.82	0.61	4.84136	-12.6834	S100A9|0.0619;LTF|26.7917;AQP1|0.0133;CKB|15.1356;LCN2|0.2208;SLC9A3R1|3.8726;CA2|8.7096;SOD1|5.7016;APOE|0.5105;S100A8|0.1644;HEXB|1.3804	11	785	185	38520	http://www.ebi.ac.uk/QuickGO/GTerm?id=GO:0055082	[]
5	5	regulation of leukocyte differentiation	GO:1902105	0.00155	0.00805	-1.1	0.03	4.84136	-12.6834	PGLYRP1|0.1722;LTF|26.7917;PGLYRP2|0.3945;SPINK5|0.1406;CA2|8.7096;SOD1|5.7016	6	256	185	38520	http://www.ebi.ac.uk/QuickGO/GTerm?id=GO:1902105	[]
6	6	ribonucleoside metabolic process	GO:0009119	0.00156	0.00809	5.21	0.65	4.84136	-12.6834	PKM|4.9659;ALDOA|2.9923;PGK1|2.0324;PARK7|5.9704;HSPA8|2.3988;TPI1|2.0893;GAPDH|2.2699;BHMT|0.8166;ACPP|64.2688	9	556	185	38520	http://www.ebi.ac.uk/QuickGO/GTerm?id=GO:0009119	[]
4	4	epithelial cell proliferation	GO:0050673	0.00159	0.00825	-4.49	-0.31	4.84136	-12.6834	LRG1|0.8017;KRT2|13.0617;CDH1|0.8091;CDH13|0.1706;KRT4|0.0817;APOE|0.5105;APOA1|10.8643	7	350	185	38520	http://www.ebi.ac.uk/QuickGO/GTerm?id=GO:0050673	[]
6	5,6	vitamin transport	GO:0051180	0.00161	0.0083	-1.04	0.03	4.84136	-12.6834	FOLR1|0.2188;CUBN|0.1067;APOA1|10.8643	3	48	185	38520	http://www.ebi.ac.uk/QuickGO/GTerm?id=GO:0051180	[]
8	7,8	hair cell differentiation	GO:0035315	0.00161	0.0083	0.85	0.22	4.84136	-12.6834	SPINK5|0.1406;SLC9A3R1|3.8726;SOD1|5.7016	3	48	185	38520	http://www.ebi.ac.uk/QuickGO/GTerm?id=GO:0035315	[]
7	6,7	intrinsic apoptotic signaling pathway in response to oxidative stress	GO:0008631	0.00161	0.0083	0.42	0.18	4.84136	-12.6834	HSPB1|0.3837;PARK7|5.9704;SOD1|5.7016	3	48	185	38520	http://www.ebi.ac.uk/QuickGO/GTerm?id=GO:0008631	[]
8	4,8	signal transduction by protein phosphorylation	GO:0023014	0.00162	0.00832	-3.36	-0.2	4.84136	-12.6834	CTSH|0.4699;SERPINB3|0.0377;EGF|0.7943;TFF2|0.2655;CRYAB|0.2333;FN1|2.3988;SLC9A3R1|3.8726;PRDX1|2.9107;SOD1|5.7016;IL1RN|0.2729;APOE|0.5105;APOA1|10.8643;C3|1.3804	13	1038	185	38520	http://www.ebi.ac.uk/QuickGO/GTerm?id=GO:0023014	[]
6	6	terpenoid metabolic process	GO:0006721	0.00163	0.00838	-0.42	0.09	4.84136	-12.6834	LRP2|0.1459;APOE|0.5105;APOA1|10.8643;APOA4|3.2211	4	104	185	38520	http://www.ebi.ac.uk/QuickGO/GTerm?id=GO:0006721	[]
6	6	neurogenesis	GO:0022008	0.00164	0.00844	-11.85	-1.03	4.84136	-12.6834	HSP90AA1|2.466;GSN|0.0718;VTN|0.0809;COL6A1|0.3162;HSPA8|2.3988;SPINK5|0.1406;CDH1|0.8091;SPP1|0.1738;FN1|2.3988;SLC9A3R1|3.8726;SOD1|5.7016;APOE|0.5105;APOA1|10.8643;HEXB|1.3804;CDH11|0.3105;APOA4|3.2211;NEU1|0.597;NAGLU|0.5546;KLK6|0.0112	19	1860	185	38520	http://www.ebi.ac.uk/QuickGO/GTerm?id=GO:0022008	[]
5	5	skeletal system development	GO:0001501	0.00168	0.00861	2.77	0.41	4.84136	-12.6834	LUM|0.2421;LTF|26.7917;AHSG|0.1432;PAPPA2|8.8716;PRDX1|2.9107;FBN1|0.1585;TIMP1|18.197;HEXB|1.3804;CDH11|0.3105	9	562	185	38520	http://www.ebi.ac.uk/QuickGO/GTerm?id=GO:0001501	[]
5	5	granulocyte migration	GO:0097530	0.00169	0.00865	-3.78	-0.24	4.84136	-12.6834	S100A9|0.0619;OLFM4|10.7647;SPP1|0.1738;S100A8|0.1644	4	105	185	38520	http://www.ebi.ac.uk/QuickGO/GTerm?id=GO:0097530	[]
6	5,6	heterotypic cell-cell adhesion	GO:0034113	0.00171	0.00872	-1.04	0.03	4.84136	-12.6834	DSC2|0.118;IL1RN|0.2729;APOA1|10.8643	3	49	185	38520	http://www.ebi.ac.uk/QuickGO/GTerm?id=GO:0034113	[]
5	5	regulation of lipid catabolic process	GO:0050994	0.00171	0.00872	2.38	0.37	4.84136	-12.6834	APOA1|10.8643;APOA4|3.2211;IDH1|6.9183	3	49	185	38520	http://www.ebi.ac.uk/QuickGO/GTerm?id=GO:0050994	[]
5	5	response to peptide	GO:1901652	0.00172	0.00872	-6.58	-0.51	4.84136	-12.6834	CTSB|0.3105;PKM|4.9659;AHSG|0.1432;GGH|0.492;FBN1|0.1585;PTPRN|0.7047;CAT|22.4905;SERPINA7|0.2188;TIMP1|18.197	9	564	185	38520	http://www.ebi.ac.uk/QuickGO/GTerm?id=GO:1901652	[]
3	3	response to inactivity	GO:0014854	0.00173	0.00872	2.05	0.34	4.84136	-12.6834	PKM|4.9659;CAT|22.4905	2	13	185	38520	http://www.ebi.ac.uk/QuickGO/GTerm?id=GO:0014854	[]
6	6	response to folic acid	GO:0051593	0.00173	0.00872	-1.8	-0.04	4.84136	-12.6834	GSN|0.0718;FOLR1|0.2188	2	13	185	38520	http://www.ebi.ac.uk/QuickGO/GTerm?id=GO:0051593	[]
8	7,8	oligopeptide transport	GO:0006857	0.00173	0.00872	1.53	0.29	4.84136	-12.6834	SLC9A3R1|3.8726;CA2|8.7096	2	13	185	38520	http://www.ebi.ac.uk/QuickGO/GTerm?id=GO:0006857	[]
7	7	protein localization to endosome	GO:0036010	0.00173	0.00872	0.79	0.21	4.84136	-12.6834	MSN|3.9084;RDX|1.5704	2	13	185	38520	http://www.ebi.ac.uk/QuickGO/GTerm?id=GO:0036010	[]
5	5	response to mercury ion	GO:0046689	0.00173	0.00872	1.1	0.24	4.84136	-12.6834	AQP1|0.0133;PARK7|5.9704	2	13	185	38520	http://www.ebi.ac.uk/QuickGO/GTerm?id=GO:0046689	[]
6	6	modulation by host of viral process	GO:0044788	0.00173	0.00872	-1.14	0.02	4.84136	-12.6834	LTF|26.7917;APOE|0.5105	2	13	185	38520	http://www.ebi.ac.uk/QuickGO/GTerm?id=GO:0044788	[]
8	4,5,6,7,8	positive regulation of bone resorption	GO:0045780	0.00173	0.00872	-0.18	0.12	4.84136	-12.6834	SPP1|0.1738;CA2|8.7096	2	13	185	38520	http://www.ebi.ac.uk/QuickGO/GTerm?id=GO:0045780	[]
7	5,6,7	positive regulation of bone remodeling	GO:0046852	0.00173	0.00872	-0.18	0.12	4.84136	-12.6834	SPP1|0.1738;CA2|8.7096	2	13	185	38520	http://www.ebi.ac.uk/QuickGO/GTerm?id=GO:0046852	[]
7	7	regulation of phosphorylation	GO:0042325	0.00174	0.00876	0.77	0.21	4.84136	-12.6834	VTN|0.0809;LTF|26.7917;AHSG|0.1432;ACE|8.2414;HSPB1|0.3837;SERPINB3|0.0377;PARK7|5.9704;EGF|0.7943;TFF2|0.2655;FN1|2.3988;SLC9A3R1|3.8726;PRDX1|2.9107;SPINK1|0.0113;SOD1|5.7016;IL1RN|0.2729;APOE|0.5105;APOA1|10.8643;C3|1.3804	18	1726	185	38520	http://www.ebi.ac.uk/QuickGO/GTerm?id=GO:0042325	[]
4	4	negative regulation of cellular component organization	GO:0051129	0.00175	0.00878	6.88	0.81	4.84136	-12.6834	GSN|0.0718;DPP4|2.3335;ACE|8.2414;RDX|1.5704;PARK7|5.9704;HSPA8|2.3988;SPP1|0.1738;VASN|0.0982;APOE|0.5105;APOA1|10.8643	10	679	185	38520	http://www.ebi.ac.uk/QuickGO/GTerm?id=GO:0051129	[]
5	5	response to growth factor	GO:0070848	0.00179	0.00897	-8.86	-0.74	4.84136	-12.6834	LUM|0.2421;LRG1|0.8017;VTN|0.0809;HSPB1|0.3837;FOLR1|0.2188;EGF|0.7943;CD63|5.7016;FBN1|0.1585;VASN|0.0982;CAT|22.4905;APOA1|10.8643;SCGB1A1|8.5507	12	923	185	38520	http://www.ebi.ac.uk/QuickGO/GTerm?id=GO:0070848	[]
6	6	positive regulation of autophagy	GO:0010508	0.00179	0.00897	1.07	0.24	4.84136	-12.6834	MYLK|0.7516;MDH1|2.7542;PARK7|5.9704;ANXA5|14.0605;KRT6A|0.1127	5	179	185	38520	http://www.ebi.ac.uk/QuickGO/GTerm?id=GO:0010508	[]
4	4	fertilization	GO:0009566	0.00183	0.00918	-0.92	0.05	4.84136	-12.6834	SERPINA5|0.0698;PARK7|5.9704;SPINK1|0.0113;IGSF8|0.0973;HEXB|1.3804	5	180	185	38520	http://www.ebi.ac.uk/QuickGO/GTerm?id=GO:0009566	[]
7	6,7	regulation of intracellular protein transport	GO:0033157	0.00187	0.00934	3.64	0.49	4.84136	-12.6834	PDZK1|11.695;LCP1|3.5645;PARK7|5.9704;EGF|0.7943;CDH1|0.8091;SLC9A3R1|3.8726;PRDX1|2.9107	7	360	185	38520	http://www.ebi.ac.uk/QuickGO/GTerm?id=GO:0033157	[]
6	6	detection of visible light	GO:0009584	0.00187	0.00935	-0.42	0.09	4.84136	-12.6834	LRP2|0.1459;APOE|0.5105;APOA1|10.8643;APOA4|3.2211	4	108	185	38520	http://www.ebi.ac.uk/QuickGO/GTerm?id=GO:0009584	[]
9	8,9	ATP metabolic process	GO:0046034	0.0019	0.00946	3.31	0.46	4.84136	-12.6834	PKM|4.9659;ALDOA|2.9923;PGK1|2.0324;PARK7|5.9704;HSPA8|2.3988;TPI1|2.0893;GAPDH|2.2699	7	361	185	38520	http://www.ebi.ac.uk/QuickGO/GTerm?id=GO:0046034	[]
6	6	blood circulation	GO:0008015	0.00191	0.00953	0.36	0.17	4.84136	-12.6834	HBB|1.6749;MME|2.2284;GAA|0.6026;ACE|8.2414;DSC2|0.118;SOD1|5.7016;APOE|0.5105;PRCP|0.0685	8	464	185	38520	http://www.ebi.ac.uk/QuickGO/GTerm?id=GO:0008015	[]
4	4	regulation of cellular response to growth factor stimulus	GO:0090287	0.00195	0.00971	-4.41	-0.3	4.84136	-12.6834	LRG1|0.8017;VTN|0.0809;FOLR1|0.2188;CD63|5.7016;FBN1|0.1585;VASN|0.0982	6	268	185	38520	http://www.ebi.ac.uk/QuickGO/GTerm?id=GO:0090287	[]
5	5	circulatory system process	GO:0003013	0.00196	0.00976	0.36	0.17	4.84136	-12.6834	HBB|1.6749;MME|2.2284;GAA|0.6026;ACE|8.2414;DSC2|0.118;SOD1|5.7016;APOE|0.5105;PRCP|0.0685	8	466	185	38520	http://www.ebi.ac.uk/QuickGO/GTerm?id=GO:0003013	[]
8	6,7,8	regulation of protein localization to nucleus	GO:1900180	0.00197	0.00977	0.19	0.15	4.84136	-12.6834	PARK7|5.9704;EGF|0.7943;CDH1|0.8091;SLC9A3R1|3.8726;PRDX1|2.9107	5	183	185	38520	http://www.ebi.ac.uk/QuickGO/GTerm?id=GO:1900180	[]
8	7,8	cholesterol transport	GO:0030301	0.002	0.00981	-1.15	0.02	4.84136	-12.6834	EGF|0.7943;APOE|0.5105;APOA1|10.8643;APOA4|3.2211	4	110	185	38520	http://www.ebi.ac.uk/QuickGO/GTerm?id=GO:0030301	[]
5	5	response to retinoic acid	GO:0032526	0.002	0.00981	-4.79	-0.34	4.84136	-12.6834	CTSH|0.4699;AQP1|0.0133;KRT13|0.0373;IGFBP2|0.0698	4	110	185	38520	http://www.ebi.ac.uk/QuickGO/GTerm?id=GO:0032526	[]
6	6	ion homeostasis	GO:0050801	0.00201	0.00981	9.01	1.02	4.84136	-12.6834	S100A9|0.0619;LTF|26.7917;CKB|15.1356;LCN2|0.2208;SLC9A3R1|3.8726;CA2|8.7096;SOD1|5.7016;APOE|0.5105;APOA1|10.8643;S100A8|0.1644;HEXB|1.3804	11	812	185	38520	http://www.ebi.ac.uk/QuickGO/GTerm?id=GO:0050801	[]
8	7,8	regulation of protein phosphorylation	GO:0001932	0.00201	0.00981	6.41	0.77	4.84136	-12.6834	VTN|0.0809;LTF|26.7917;ACE|8.2414;HSPB1|0.3837;SERPINB3|0.0377;PARK7|5.9704;EGF|0.7943;TFF2|0.2655;FN1|2.3988;SLC9A3R1|3.8726;PRDX1|2.9107;SPINK1|0.0113;SOD1|5.7016;IL1RN|0.2729;APOE|0.5105;APOA1|10.8643;C3|1.3804	17	1607	185	38520	http://www.ebi.ac.uk/QuickGO/GTerm?id=GO:0001932	[]
9	5,7,9	regulation of angiotensin levels in blood	GO:0002002	0.00201	0.00981	1.26	0.26	4.84136	-12.6834	MME|2.2284;ACE|8.2414	2	14	185	38520	http://www.ebi.ac.uk/QuickGO/GTerm?id=GO:0002002	[]
7	7	protein deglycosylation	GO:0006517	0.00201	0.00981	-0.26	0.11	4.84136	-12.6834	MAN2B2|0.3048;PARK7|5.9704	2	14	185	38520	http://www.ebi.ac.uk/QuickGO/GTerm?id=GO:0006517	[]
8	6,7,8	regulation of proton transport	GO:0010155	0.00201	0.00981	1.36	0.27	4.84136	-12.6834	PARK7|5.9704;SLC9A3R1|3.8726	2	14	185	38520	http://www.ebi.ac.uk/QuickGO/GTerm?id=GO:0010155	[]
8	7,8	polarized epithelial cell differentiation	GO:0030859	0.00201	0.00981	1.18	0.25	4.84136	-12.6834	MSN|3.9084;SLC9A3R1|3.8726	2	14	185	38520	http://www.ebi.ac.uk/QuickGO/GTerm?id=GO:0030859	[]
5	5	chondroitin sulfate catabolic process	GO:0030207	0.00201	0.00981	0.56	0.19	4.84136	-12.6834	BGN|0.1995;HEXB|1.3804	2	14	185	38520	http://www.ebi.ac.uk/QuickGO/GTerm?id=GO:0030207	[]
9	7,8,9	regulation of natural killer cell differentiation	GO:0032823	0.00201	0.00981	-1.17	0.02	4.84136	-12.6834	PGLYRP1|0.1722;PGLYRP2|0.3945	2	14	185	38520	http://www.ebi.ac.uk/QuickGO/GTerm?id=GO:0032823	[]
6	6	establishment of monopolar cell polarity	GO:0061162	0.00201	0.00981	1.18	0.25	4.84136	-12.6834	MSN|3.9084;SLC9A3R1|3.8726	2	14	185	38520	http://www.ebi.ac.uk/QuickGO/GTerm?id=GO:0061162	[]
5	5	establishment or maintenance of monopolar cell polarity	GO:0061339	0.00201	0.00981	1.18	0.25	4.84136	-12.6834	MSN|3.9084;SLC9A3R1|3.8726	2	14	185	38520	http://www.ebi.ac.uk/QuickGO/GTerm?id=GO:0061339	[]
8	6,7,8	regulation of cholesterol biosynthetic process	GO:0045540	0.00201	0.00981	-0.46	0.09	4.84136	-12.6834	SOD1|5.7016;APOE|0.5105	2	14	185	38520	http://www.ebi.ac.uk/QuickGO/GTerm?id=GO:0045540	[]
5	5	autophagy	GO:0006914	0.00203	0.00988	-2.78	-0.14	4.84136	-12.6834	CTSB|0.3105;MYLK|0.7516;MDH1|2.7542;S100A9|0.0619;PARK7|5.9704;LAMP1|2.6062;ANXA5|14.0605;S100A8|0.1644;KRT6A|0.1127	9	578	185	38520	http://www.ebi.ac.uk/QuickGO/GTerm?id=GO:0006914	[]
5	5	response to cytokine	GO:0034097	0.00204	0.00992	6.94	0.82	4.84136	-12.6834	CTSB|0.3105;CD14|0.8241;MME|2.2284;VCAM1|9.4624;TFF2|0.2655;GAPDH|2.2699;PTPRN|0.7047;HLA-DRA|1.406;TIMP1|18.197;IL1RN|0.2729;APOA1|10.8643;SCGB1A1|8.5507	12	938	185	38520	http://www.ebi.ac.uk/QuickGO/GTerm?id=GO:0034097	[]
5	5	sphingolipid metabolic process	GO:0006665	0.00206	0.01	-1.23	0.01	4.84136	-12.6834	CTSA|0.4571;GLB1|0.52;ARSA|0.5754;HEXB|1.3804;NEU1|0.597	5	185	185	38520	http://www.ebi.ac.uk/QuickGO/GTerm?id=GO:0006665	[]
7	4,7	regulation of blood pressure	GO:0008217	0.00206	0.01	3.41	0.47	4.84136	-12.6834	HBB|1.6749;MME|2.2284;ACE|8.2414;SOD1|5.7016;PRCP|0.0685	5	185	185	38520	http://www.ebi.ac.uk/QuickGO/GTerm?id=GO:0008217	[]
7	6,7	acid secretion	GO:0046717	0.00207	0.01	-0.36	0.1	4.84136	-12.6834	ACE|8.2414;TFF2|0.2655;SLC9A3R1|3.8726;IL1RN|0.2729	4	111	185	38520	http://www.ebi.ac.uk/QuickGO/GTerm?id=GO:0046717	[]
5	5	regulation of organelle organization	GO:0033043	0.0021	0.0102	11.18	1.23	4.84136	-12.6834	GSN|0.0718;PDCD6IP|2.0701;MSN|3.9084;MYLK|0.7516;MDH1|2.7542;S100A9|0.0619;LCP1|3.5645;RDX|1.5704;PARK7|5.9704;YWHAZ|2.704;EGF|0.7943;SH3BGRL3|0.0409;ANXA5|14.0605;APOA1|10.8643;S100A8|0.1644;KRT6A|0.1127	16	1474	185	38520	http://www.ebi.ac.uk/QuickGO/GTerm?id=GO:0033043	[]
6	6	muscle contraction	GO:0006936	0.00211	0.0102	-3.65	-0.22	4.84136	-12.6834	GAA|0.6026;ALDOA|2.9923;MYLK|0.7516;CRYAB|0.2333;DSC2|0.118;TPM4|0.3076;SOD1|5.7016	7	368	185	38520	http://www.ebi.ac.uk/QuickGO/GTerm?id=GO:0006936	[]
8	8	pyruvate metabolic process	GO:0006090	0.00211	0.0102	2.16	0.35	4.84136	-12.6834	PKM|4.9659;ALDOA|2.9923;PGK1|2.0324;TPI1|2.0893;GAPDH|2.2699	5	186	185	38520	http://www.ebi.ac.uk/QuickGO/GTerm?id=GO:0006090	[]
8	6,7,8	regulation of transforming growth factor beta receptor signaling pathway	GO:0017015	0.00214	0.0103	-2.56	-0.12	4.84136	-12.6834	LRG1|0.8017;FOLR1|0.2188;FBN1|0.1585;VASN|0.0982	4	112	185	38520	http://www.ebi.ac.uk/QuickGO/GTerm?id=GO:0017015	[]
6	5,6	regulation of cellular response to transforming growth factor beta stimulus	GO:1903844	0.00214	0.0103	-2.56	-0.12	4.84136	-12.6834	LRG1|0.8017;FOLR1|0.2188;FBN1|0.1585;VASN|0.0982	4	112	185	38520	http://www.ebi.ac.uk/QuickGO/GTerm?id=GO:1903844	[]
5	4,5	negative regulation of immune effector process	GO:0002698	0.00214	0.0103	-1.23	0.01	4.84136	-12.6834	PGLYRP1|0.1722;PGLYRP2|0.3945;APOA1|10.8643;A2M|22.9087	4	112	185	38520	http://www.ebi.ac.uk/QuickGO/GTerm?id=GO:0002698	[]
10	6,7,8,10	positive regulation of defense response to virus by host	GO:0002230	0.00221	0.0106	-0.52	0.08	4.84136	-12.6834	MYLK|0.7516;MDH1|2.7542;ANXA5|14.0605;KRT6A|0.1127	4	113	185	38520	http://www.ebi.ac.uk/QuickGO/GTerm?id=GO:0002230	[]
6	5,6	phototransduction	GO:0007602	0.00221	0.0106	-0.42	0.09	4.84136	-12.6834	LRP2|0.1459;APOE|0.5105;APOA1|10.8643;APOA4|3.2211	4	113	185	38520	http://www.ebi.ac.uk/QuickGO/GTerm?id=GO:0007602	[]
5	5	artery morphogenesis	GO:0048844	0.00226	0.0108	-1.08	0.03	4.84136	-12.6834	MYLK|0.7516;FOLR1|0.2188;APOE|0.5105	3	54	185	38520	http://www.ebi.ac.uk/QuickGO/GTerm?id=GO:0048844	[]
5	5	endothelial cell proliferation	GO:0001935	0.00228	0.0109	-2.19	-0.08	4.84136	-12.6834	LRG1|0.8017;CDH13|0.1706;APOE|0.5105;APOA1|10.8643	4	114	185	38520	http://www.ebi.ac.uk/QuickGO/GTerm?id=GO:0001935	[]
5	5	sensory organ morphogenesis	GO:0090596	0.0023	0.011	-5.7	-0.43	4.84136	-12.6834	AQP1|0.0133;KRT13|0.0373;SLC9A3R1|3.8726;FBN1|0.1585;SOD1|5.7016;NAGLU|0.5546	6	277	185	38520	http://www.ebi.ac.uk/QuickGO/GTerm?id=GO:0090596	[]
6	6	regulation of angiotensin metabolic process	GO:0060177	0.00231	0.011	1.26	0.26	4.84136	-12.6834	MME|2.2284;ACE|8.2414	2	15	185	38520	http://www.ebi.ac.uk/QuickGO/GTerm?id=GO:0060177	[]
5	5	auditory receptor cell morphogenesis	GO:0002093	0.00231	0.011	1.34	0.27	4.84136	-12.6834	SLC9A3R1|3.8726;SOD1|5.7016	2	15	185	38520	http://www.ebi.ac.uk/QuickGO/GTerm?id=GO:0002093	[]
6	6	intestinal cholesterol absorption	GO:0030299	0.00231	0.011	1.54	0.29	4.84136	-12.6834	APOA1|10.8643;APOA4|3.2211	2	15	185	38520	http://www.ebi.ac.uk/QuickGO/GTerm?id=GO:0030299	[]
7	5,7	negative regulation of response to reactive oxygen species	GO:1901032	0.00231	0.011	2.31	0.36	4.84136	-12.6834	PARK7|5.9704;HP|34.3558	2	15	185	38520	http://www.ebi.ac.uk/QuickGO/GTerm?id=GO:1901032	[]
7	6,7	sterol transport	GO:0015918	0.00235	0.0112	-1.15	0.02	4.84136	-12.6834	EGF|0.7943;APOE|0.5105;APOA1|10.8643;APOA4|3.2211	4	115	185	38520	http://www.ebi.ac.uk/QuickGO/GTerm?id=GO:0015918	[]
3	3	positive regulation of developmental process	GO:0051094	0.00236	0.0112	-9.71	-0.82	4.84136	-12.6834	LRG1|0.8017;OLFM4|10.7647;LTF|26.7917;HSPB1|0.3837;CTSH|0.4699;AQP1|0.0133;SERPINB3|0.0377;EGF|0.7943;FN1|2.3988;CA2|8.7096;APOE|0.5105;APOA1|10.8643;C3|1.3804;NEU1|0.597	14	1217	185	38520	http://www.ebi.ac.uk/QuickGO/GTerm?id=GO:0051094	[]
5	5	gastrulation	GO:0007369	0.00237	0.0112	-1.42	0	4.84136	-12.6834	VTN|0.0809;COL6A1|0.3162;FN1|2.3988;IL1RN|0.2729;APOA1|10.8643	5	191	185	38520	http://www.ebi.ac.uk/QuickGO/GTerm?id=GO:0007369	[]
5	5	positive regulation of lipid biosynthetic process	GO:0046889	0.00238	0.0113	0.29	0.16	4.84136	-12.6834	APOE|0.5105;APOA1|10.8643;APOA4|3.2211	3	55	185	38520	http://www.ebi.ac.uk/QuickGO/GTerm?id=GO:0046889	[]
5	5	cellular response to organonitrogen compound	GO:0071417	0.00241	0.0114	-6.41	-0.49	4.84136	-12.6834	COL6A1|0.3162;AHSG|0.1432;AQP1|0.0133;FOLR1|0.2188;AOC1|2.0701;CDH1|0.8091;FBN1|0.1585;SOD1|5.7016;IL1RN|0.2729	9	593	185	38520	http://www.ebi.ac.uk/QuickGO/GTerm?id=GO:0071417	[]
4	4	regulation of developmental growth	GO:0048638	0.00243	0.0114	0.52	0.19	4.84136	-12.6834	SPP1|0.1738;FN1|2.3988;SOD1|5.7016;APOE|0.5105;C3|1.3804;PI16|0.182	6	280	185	38520	http://www.ebi.ac.uk/QuickGO/GTerm?id=GO:0048638	[]
5	5	nucleoside metabolic process	GO:0009116	0.00246	0.0116	5.21	0.65	4.84136	-12.6834	PKM|4.9659;ALDOA|2.9923;PGK1|2.0324;PARK7|5.9704;HSPA8|2.3988;TPI1|2.0893;GAPDH|2.2699;BHMT|0.8166;ACPP|64.2688	9	595	185	38520	http://www.ebi.ac.uk/QuickGO/GTerm?id=GO:0009116	[]
5	5	response to lipopolysaccharide	GO:0032496	0.00251	0.0118	-5	-0.36	4.84136	-12.6834	CD14|0.8241;S100A9|0.0619;LTF|26.7917;IL1RN|0.2729;S100A8|0.1644;SCGB1A1|8.5507	6	282	185	38520	http://www.ebi.ac.uk/QuickGO/GTerm?id=GO:0032496	[]
4	4	cell junction organization	GO:0034330	0.00251	0.0118	-3.08	-0.17	4.84136	-12.6834	ACE|8.2414;KRT5|0.3802;CDH1|0.8091;CDH13|0.1706;FN1|2.3988;CDH11|0.3105	6	282	185	38520	http://www.ebi.ac.uk/QuickGO/GTerm?id=GO:0034330	[]
8	6,7,8	peptide secretion	GO:0002790	0.00256	0.012	-5.67	-0.42	4.84136	-12.6834	S100A9|0.0619;AQP1|0.0133;PTPRN|0.7047;IL1RN|0.2729;S100A8|0.1644;MMP7|0.0817	6	283	185	38520	http://www.ebi.ac.uk/QuickGO/GTerm?id=GO:0002790	[]
6	5,6	regulation of establishment of protein localization	GO:0070201	0.00258	0.0121	5.57	0.68	4.84136	-12.6834	PDZK1|11.695;CD14|0.8241;LCP1|3.5645;PARK7|5.9704;YWHAZ|2.704;EGF|0.7943;CDH1|0.8091;FN1|2.3988;SLC9A3R1|3.8726;PRDX1|2.9107;APOA1|10.8643	11	839	185	38520	http://www.ebi.ac.uk/QuickGO/GTerm?id=GO:0070201	[]
5	5	protein stabilization	GO:0050821	0.00258	0.0121	2.58	0.39	4.84136	-12.6834	PARK7|5.9704;GAPDH|2.2699;LAMP1|2.6062;APOA1|10.8643	4	118	185	38520	http://www.ebi.ac.uk/QuickGO/GTerm?id=GO:0050821	[]
7	4,5,6,7	negative regulation of signal transduction	GO:0009968	0.0026	0.0121	-12.25	-1.07	4.84136	-12.6834	OLFM4|10.7647;LTF|26.7917;AHSG|0.1432;HSPB1|0.3837;SERPINB3|0.0377;PARK7|5.9704;EGF|0.7943;SLC9A3R1|3.8726;FBN1|0.1585;VASN|0.0982;SPINK1|0.0113;IL1RN|0.2729;APOE|0.5105;APOA1|10.8643	14	1230	185	38520	http://www.ebi.ac.uk/QuickGO/GTerm?id=GO:0009968	[]
7	6,7	positive regulation of fatty acid biosynthetic process	GO:0045723	0.00263	0.0122	1.54	0.29	4.84136	-12.6834	APOA1|10.8643;APOA4|3.2211	2	16	185	38520	http://www.ebi.ac.uk/QuickGO/GTerm?id=GO:0045723	[]
7	7	regulation of lipoprotein lipase activity	GO:0051004	0.00263	0.0122	1.54	0.29	4.84136	-12.6834	APOA1|10.8643;APOA4|3.2211	2	16	185	38520	http://www.ebi.ac.uk/QuickGO/GTerm?id=GO:0051004	[]
7	6,7	podosome assembly	GO:0071800	0.00263	0.0122	0.59	0.19	4.84136	-12.6834	GSN|0.0718;LCP1|3.5645	2	16	185	38520	http://www.ebi.ac.uk/QuickGO/GTerm?id=GO:0071800	[]
6	6	response to magnesium ion	GO:0032026	0.00263	0.0122	-0.06	0.13	4.84136	-12.6834	CD14|0.8241;C3|1.3804	2	16	185	38520	http://www.ebi.ac.uk/QuickGO/GTerm?id=GO:0032026	[]
7	7	cellular response to cadmium ion	GO:0071276	0.00263	0.0122	0.39	0.17	4.84136	-12.6834	GSN|0.0718;SOD1|5.7016	2	16	185	38520	http://www.ebi.ac.uk/QuickGO/GTerm?id=GO:0071276	[]
9	5,6,7,8,9	regulation of early endosome to late endosome transport	GO:2000641	0.00263	0.0122	0.79	0.21	4.84136	-12.6834	MSN|3.9084;RDX|1.5704	2	16	185	38520	http://www.ebi.ac.uk/QuickGO/GTerm?id=GO:2000641	[]
3	3	macromolecule localization	GO:0033036	0.00271	0.0125	17.38	1.84	4.84136	-12.6834	PDZK1|11.695;CD14|0.8241;HSP90AA1|2.466;GSN|0.0718;PDCD6IP|2.0701;MSN|3.9084;LCP1|3.5645;ACE|8.2414;RDX|1.5704;SERPINA5|0.0698;PARK7|5.9704;YWHAZ|2.704;CUBN|0.1067;LMAN2|0.2466;EGF|0.7943;CTSA|0.4571;CDH1|0.8091;FN1|2.3988;CD63|5.7016;SLC9A3R1|3.8726;PRDX1|2.9107;FBN1|0.1585;PTPRN|0.7047;LAMP1|2.6062;IL1RN|0.2729;APOE|0.5105;APOA1|10.8643;AZGP1|1.2246;C3|1.3804;HEXB|1.3804;APOA4|3.2211;CPE|21.0863	32	3996	185	38520	http://www.ebi.ac.uk/QuickGO/GTerm?id=GO:0033036	[]
4	4	organophosphate metabolic process	GO:0019637	0.00273	0.0126	14.08	1.52	4.84136	-12.6834	PKM|4.9659;ALDOA|2.9923;MDH1|2.7542;PRDX6|8.9536;AQP1|0.0133;PGK1|2.0324;FABP5|0.0296;PARK7|5.9704;HSPA8|2.3988;TPI1|2.0893;GAPDH|2.2699;ACPP|64.2688;CAT|22.4905;APOE|0.5105;APOA1|10.8643;HEXB|1.3804;APOA4|3.2211;IDH1|6.9183	18	1800	185	38520	http://www.ebi.ac.uk/QuickGO/GTerm?id=GO:0019637	[]
4	4	ossification	GO:0001503	0.00275	0.0127	-5.9	-0.44	4.84136	-12.6834	LTF|26.7917;COL6A1|0.3162;AHSG|0.1432;SPP1|0.1738;TPM4|0.3076;CAT|22.4905;CDH11|0.3105	7	386	185	38520	http://www.ebi.ac.uk/QuickGO/GTerm?id=GO:0001503	[]
6	5,6	endoderm formation	GO:0001706	0.00277	0.0128	-0.38	0.1	4.84136	-12.6834	VTN|0.0809;COL6A1|0.3162;FN1|2.3988	3	58	185	38520	http://www.ebi.ac.uk/QuickGO/GTerm?id=GO:0001706	[]
5	4,5	maternal process involved in female pregnancy	GO:0060135	0.00277	0.0128	-2.36	-0.1	4.84136	-12.6834	CTSB|0.3105;SPP1|0.1738;MMP7|0.0817	3	58	185	38520	http://www.ebi.ac.uk/QuickGO/GTerm?id=GO:0060135	[]
5	5	negative regulation of cell migration	GO:0030336	0.00283	0.013	-1.85	-0.05	4.84136	-12.6834	KRT16|0.1995;SLC9A3R1|3.8726;TIMP1|18.197;IL1RN|0.2729;APOE|0.5105	5	199	185	38520	http://www.ebi.ac.uk/QuickGO/GTerm?id=GO:0030336	[]
7	6,7	positive regulation of mitochondrion organization	GO:0010822	0.00284	0.0131	3.87	0.52	4.84136	-12.6834	MYLK|0.7516;MDH1|2.7542;PARK7|5.9704;YWHAZ|2.704;ANXA5|14.0605;KRT6A|0.1127	6	289	185	38520	http://www.ebi.ac.uk/QuickGO/GTerm?id=GO:0010822	[]
4	4	cellular lipid metabolic process	GO:0044255	0.00291	0.0133	3.74	0.5	4.84136	-12.6834	PRDX6|8.9536;FABP5|0.0296;CTSA|0.4571;GLB1|0.52;LRP2|0.1459;CAT|22.4905;APOE|0.5105;APOA1|10.8643;C3|1.3804;ARSA|0.5754;HEXB|1.3804;APOA4|3.2211;GGT1|5.0582;NEU1|0.597;IDH1|6.9183	15	1383	185	38520	http://www.ebi.ac.uk/QuickGO/GTerm?id=GO:0044255	[]
8	7,8	regulation of nucleocytoplasmic transport	GO:0046822	0.00295	0.0135	0.19	0.15	4.84136	-12.6834	PARK7|5.9704;EGF|0.7943;CDH1|0.8091;SLC9A3R1|3.8726;PRDX1|2.9107	5	201	185	38520	http://www.ebi.ac.uk/QuickGO/GTerm?id=GO:0046822	[]
4	4	cofactor metabolic process	GO:0051186	0.00296	0.0136	4.18	0.55	4.84136	-12.6834	PKM|4.9659;ALDOA|2.9923;MDH1|2.7542;PGK1|2.0324;FOLR1|0.2188;TPI1|2.0893;GAPDH|2.2699;BHMT|0.8166;IDH1|6.9183	9	612	185	38520	http://www.ebi.ac.uk/QuickGO/GTerm?id=GO:0051186	[]
7	5,6,7	negative regulation of alcohol biosynthetic process	GO:1902931	0.00298	0.0136	-0.46	0.09	4.84136	-12.6834	SOD1|5.7016;APOE|0.5105	2	17	185	38520	http://www.ebi.ac.uk/QuickGO/GTerm?id=GO:1902931	[]
7	7	ganglioside metabolic process	GO:0001573	0.00298	0.0136	0.08	0.14	4.84136	-12.6834	HEXB|1.3804;NEU1|0.597	2	17	185	38520	http://www.ebi.ac.uk/QuickGO/GTerm?id=GO:0001573	[]
6	6	leukocyte differentiation	GO:0002521	0.00298	0.0136	6.77	0.8	4.84136	-12.6834	PGLYRP1|0.1722;LTF|26.7917;PGLYRP2|0.3945;VCAM1|9.4624;SPINK5|0.1406;CA2|8.7096;SOD1|5.7016;GLO1|4.4463	8	499	185	38520	http://www.ebi.ac.uk/QuickGO/GTerm?id=GO:0002521	[]
4	4	cellular response to abiotic stimulus	GO:0071214	0.00299	0.0136	-4.58	-0.31	4.84136	-12.6834	CTSB|0.3105;MME|2.2284;MYLK|0.7516;AQP1|0.0133;CRYAB|0.2333;MMP7|0.0817	6	292	185	38520	http://www.ebi.ac.uk/QuickGO/GTerm?id=GO:0071214	[]
7	6,7	response to estradiol	GO:0032355	0.003	0.0137	0.3	0.16	4.84136	-12.6834	CRYAB|0.2333;CAT|22.4905;IGFBP2|0.0698;C3|1.3804	4	123	185	38520	http://www.ebi.ac.uk/QuickGO/GTerm?id=GO:0032355	[]
7	6,7	I-kappaB kinase/NF-kappaB signaling	GO:0007249	0.00304	0.0138	-1.86	-0.05	4.84136	-12.6834	CD14|0.8241;OLFM4|10.7647;LTF|26.7917;HSPB1|0.3837;SHISA5|0.2704;PRDX1|2.9107	6	293	185	38520	http://www.ebi.ac.uk/QuickGO/GTerm?id=GO:0007249	[]
6	6	membrane protein proteolysis	GO:0033619	0.00305	0.0138	-1.26	0.01	4.84136	-12.6834	CTSH|0.4699;TIMP1|18.197;APOE|0.5105	3	60	185	38520	http://www.ebi.ac.uk/QuickGO/GTerm?id=GO:0033619	[]
6	6	regulation of monooxygenase activity	GO:0032768	0.00305	0.0138	0.29	0.16	4.84136	-12.6834	HSP90AA1|2.466;PARK7|5.9704;APOE|0.5105	3	60	185	38520	http://www.ebi.ac.uk/QuickGO/GTerm?id=GO:0032768	[]
4	4	glycosyl compound metabolic process	GO:1901657	0.00306	0.0139	5.21	0.65	4.84136	-12.6834	PKM|4.9659;ALDOA|2.9923;PGK1|2.0324;PARK7|5.9704;HSPA8|2.3988;TPI1|2.0893;GAPDH|2.2699;BHMT|0.8166;ACPP|64.2688	9	615	185	38520	http://www.ebi.ac.uk/QuickGO/GTerm?id=GO:1901657	[]
9	5,6,7,9	regulation of defense response to virus by host	GO:0050691	0.00309	0.014	-0.52	0.08	4.84136	-12.6834	MYLK|0.7516;MDH1|2.7542;ANXA5|14.0605;KRT6A|0.1127	4	124	185	38520	http://www.ebi.ac.uk/QuickGO/GTerm?id=GO:0050691	[]
6	6	immune response-regulating cell surface receptor signaling pathway	GO:0002768	0.00309	0.014	-7.23	-0.58	4.84136	-12.6834	HSP90AA1|2.466;P06314|0.0809;EGF|0.7943;HLA-DRA|1.406;P01594|0.0643;IGHG3|0.2992;P01614|0.7727;P01616|0.0145;P01617|0.0146	9	616	185	38520	http://www.ebi.ac.uk/QuickGO/GTerm?id=GO:0002768	[]
7	7	nucleoside diphosphate phosphorylation	GO:0006165	0.00314	0.0142	2.16	0.35	4.84136	-12.6834	PKM|4.9659;ALDOA|2.9923;PGK1|2.0324;TPI1|2.0893;GAPDH|2.2699	5	204	185	38520	http://www.ebi.ac.uk/QuickGO/GTerm?id=GO:0006165	[]
9	6,8,9	regulation of metal ion transport	GO:0010959	0.00317	0.0143	-2.96	-0.16	4.84136	-12.6834	SEMG1|41.6869;MYLK|0.7516;AHNAK|0.0643;EGF|0.7943;CD63|5.7016;SLC9A3R1|3.8726;SPINK1|0.0113	7	396	185	38520	http://www.ebi.ac.uk/QuickGO/GTerm?id=GO:0010959	[]
7	5,7	immune response-activating cell surface receptor signaling pathway	GO:0002429	0.00317	0.0143	-7.13	-0.57	4.84136	-12.6834	HSP90AA1|2.466;P06314|0.0809;HLA-DRA|1.406;P01594|0.0643;IGHG3|0.2992;P01614|0.7727;P01616|0.0145;P01617|0.0146	8	504	185	38520	http://www.ebi.ac.uk/QuickGO/GTerm?id=GO:0002429	[]
3	3	anatomical structure formation involved in morphogenesis	GO:0048646	0.00317	0.0143	-11	-0.95	4.84136	-12.6834	LRG1|0.8017;VTN|0.0809;COL6A1|0.3162;HSPB1|0.3837;CTSH|0.4699;AQP1|0.0133;KLK3|65.4636;FOLR1|0.2188;COL15A1|0.1556;EGF|0.7943;SPINK5|0.1406;CDH13|0.1706;FN1|2.3988;C3|1.3804;PRCP|0.0685	15	1396	185	38520	http://www.ebi.ac.uk/QuickGO/GTerm?id=GO:0048646	[]
7	5,6,7	regulation of macroautophagy	GO:0016241	0.00321	0.0144	1.07	0.24	4.84136	-12.6834	MYLK|0.7516;MDH1|2.7542;PARK7|5.9704;ANXA5|14.0605;KRT6A|0.1127	5	205	185	38520	http://www.ebi.ac.uk/QuickGO/GTerm?id=GO:0016241	[]
7	4,6,7	negative regulation of secretion	GO:0051048	0.00321	0.0144	-1.42	0	4.84136	-12.6834	EGF|0.7943;TFF2|0.2655;FN1|2.3988;IL1RN|0.2729;APOA1|10.8643	5	205	185	38520	http://www.ebi.ac.uk/QuickGO/GTerm?id=GO:0051048	[]
5	4,5	nucleobase-containing small molecule metabolic process	GO:0055086	0.00322	0.0144	10.01	1.12	4.84136	-12.6834	PKM|4.9659;ALDOA|2.9923;MDH1|2.7542;AQP1|0.0133;PGK1|2.0324;PARK7|5.9704;HSPA8|2.3988;TPI1|2.0893;GAPDH|2.2699;BHMT|0.8166;ACPP|64.2688;CAT|22.4905;APOE|0.5105;IDH1|6.9183	14	1260	185	38520	http://www.ebi.ac.uk/QuickGO/GTerm?id=GO:0055086	[]
8	8	Fc-epsilon receptor signaling pathway	GO:0038095	0.00324	0.0145	-6.17	-0.47	4.84136	-12.6834	P06314|0.0809;EGF|0.7943;P01594|0.0643;P01614|0.7727;P01616|0.0145;P01617|0.0146	6	297	185	38520	http://www.ebi.ac.uk/QuickGO/GTerm?id=GO:0038095	[]
9	6,9	protein N-linked glycosylation via asparagine	GO:0018279	0.00327	0.0146	-1.81	-0.04	4.84136	-12.6834	CTSA|0.4571;GLB1|0.52;MAN1A1|0.1096;NEU1|0.597	4	126	185	38520	http://www.ebi.ac.uk/QuickGO/GTerm?id=GO:0018279	[]
5	5	detection of light stimulus	GO:0009583	0.00327	0.0146	-0.42	0.09	4.84136	-12.6834	LRP2|0.1459;APOE|0.5105;APOA1|10.8643;APOA4|3.2211	4	126	185	38520	http://www.ebi.ac.uk/QuickGO/GTerm?id=GO:0009583	[]
6	5,6	cell morphogenesis	GO:0000902	0.00332	0.0148	11.41	1.26	4.84136	-12.6834	HSP90AA1|2.466;ALDOA|2.9923;GSN|0.0718;MSN|3.9084;OLFM4|10.7647;COL6A1|0.3162;SERPINB3|0.0377;HSPA8|2.3988;SPP1|0.1738;FN1|2.3988;SLC9A3R1|3.8726;VASN|0.0982;SOD1|5.7016;APOE|0.5105;APOA1|10.8643;HEXB|1.3804;CDH11|0.3105	17	1688	185	38520	http://www.ebi.ac.uk/QuickGO/GTerm?id=GO:0000902	[]
7	6,7	positive regulation of protein maturation	GO:1903319	0.00334	0.0148	1	0.23	4.84136	-12.6834	GSN|0.0718;C3|1.3804	2	18	185	38520	http://www.ebi.ac.uk/QuickGO/GTerm?id=GO:1903319	[]
5	5	response to thyroid hormone	GO:0097066	0.00334	0.0148	-0.84	0.05	4.84136	-12.6834	CTSB|0.3105;CTSH|0.4699	2	18	185	38520	http://www.ebi.ac.uk/QuickGO/GTerm?id=GO:0097066	[]
7	7	positive regulation of protein processing	GO:0010954	0.00334	0.0148	1	0.23	4.84136	-12.6834	GSN|0.0718;C3|1.3804	2	18	185	38520	http://www.ebi.ac.uk/QuickGO/GTerm?id=GO:0010954	[]
9	6,8,9	pattern recognition receptor signaling pathway	GO:0002221	0.00335	0.0148	-3.19	-0.18	4.84136	-12.6834	CTSB|0.3105;CD14|0.8241;PGLYRP1|0.1722;LTF|26.7917;PGLYRP2|0.3945	5	207	185	38520	http://www.ebi.ac.uk/QuickGO/GTerm?id=GO:0002221	[]
5	5	artery development	GO:0060840	0.00335	0.0148	-1.08	0.03	4.84136	-12.6834	MYLK|0.7516;FOLR1|0.2188;APOE|0.5105	3	62	185	38520	http://www.ebi.ac.uk/QuickGO/GTerm?id=GO:0060840	[]
4	3,4	regulation of plasma lipoprotein particle levels	GO:0097006	0.00335	0.0148	0.29	0.16	4.84136	-12.6834	APOE|0.5105;APOA1|10.8643;APOA4|3.2211	3	62	185	38520	http://www.ebi.ac.uk/QuickGO/GTerm?id=GO:0097006	[]
6	5,6	cell death in response to oxidative stress	GO:0036473	0.00335	0.0148	0.42	0.18	4.84136	-12.6834	HSPB1|0.3837;PARK7|5.9704;SOD1|5.7016	3	62	185	38520	http://www.ebi.ac.uk/QuickGO/GTerm?id=GO:0036473	[]
8	8	peptidyl-asparagine modification	GO:0018196	0.00336	0.0149	-1.81	-0.04	4.84136	-12.6834	CTSA|0.4571;GLB1|0.52;MAN1A1|0.1096;NEU1|0.597	4	127	185	38520	http://www.ebi.ac.uk/QuickGO/GTerm?id=GO:0018196	[]
7	5,7	response to molecule of bacterial origin	GO:0002237	0.00346	0.0153	-5	-0.36	4.84136	-12.6834	CD14|0.8241;S100A9|0.0619;LTF|26.7917;IL1RN|0.2729;S100A8|0.1644;SCGB1A1|8.5507	6	301	185	38520	http://www.ebi.ac.uk/QuickGO/GTerm?id=GO:0002237	[]
6	4,6	regulation of cell shape	GO:0008360	0.00348	0.0153	2.18	0.35	4.84136	-12.6834	ALDOA|2.9923;MSN|3.9084;FN1|2.3988;SLC9A3R1|3.8726;HEXB|1.3804	5	209	185	38520	http://www.ebi.ac.uk/QuickGO/GTerm?id=GO:0008360	[]
6	5,6	osteoblast differentiation	GO:0001649	0.00348	0.0153	-2.78	-0.14	4.84136	-12.6834	LTF|26.7917;COL6A1|0.3162;SPP1|0.1738;TPM4|0.3076;CAT|22.4905	5	209	185	38520	http://www.ebi.ac.uk/QuickGO/GTerm?id=GO:0001649	[]
8	8	purine ribonucleoside triphosphate metabolic process	GO:0009205	0.00349	0.0153	3.31	0.46	4.84136	-12.6834	PKM|4.9659;ALDOA|2.9923;PGK1|2.0324;PARK7|5.9704;HSPA8|2.3988;TPI1|2.0893;GAPDH|2.2699	7	403	185	38520	http://www.ebi.ac.uk/QuickGO/GTerm?id=GO:0009205	[]
5	5	regulation of reactive oxygen species biosynthetic process	GO:1903426	0.0035	0.0154	1.39	0.27	4.84136	-12.6834	HBB|1.6749;HSP90AA1|2.466;PARK7|5.9704	3	63	185	38520	http://www.ebi.ac.uk/QuickGO/GTerm?id=GO:1903426	[]
8	7,8	protein homooligomerization	GO:0051260	0.00352	0.0154	4.78	0.61	4.84136	-12.6834	VWF|1.3804;ALDOA|2.9923;OLFM4|10.7647;CRYAB|0.2333;CAT|22.4905;ANXA5|14.0605	6	302	185	38520	http://www.ebi.ac.uk/QuickGO/GTerm?id=GO:0051260	[]
6	6	nucleotide metabolic process	GO:0009117	0.00356	0.0156	9.92	1.11	4.84136	-12.6834	PKM|4.9659;ALDOA|2.9923;MDH1|2.7542;AQP1|0.0133;PGK1|2.0324;PARK7|5.9704;HSPA8|2.3988;TPI1|2.0893;GAPDH|2.2699;ACPP|64.2688;CAT|22.4905;APOE|0.5105;IDH1|6.9183	13	1138	185	38520	http://www.ebi.ac.uk/QuickGO/GTerm?id=GO:0009117	[]
7	7	inorganic ion homeostasis	GO:0098771	0.00359	0.0157	7.97	0.92	4.84136	-12.6834	S100A9|0.0619;LTF|26.7917;CKB|15.1356;LCN2|0.2208;SLC9A3R1|3.8726;CA2|8.7096;SOD1|5.7016;APOE|0.5105;S100A8|0.1644;HEXB|1.3804	10	751	185	38520	http://www.ebi.ac.uk/QuickGO/GTerm?id=GO:0098771	[]
7	6,7	positive regulation of cellular protein catabolic process	GO:1903364	0.0037	0.0161	-0.79	0.06	4.84136	-12.6834	MSN|3.9084;CTSC|0.3076;RDX|1.5704;EGF|0.7943;APOE|0.5105	5	212	185	38520	http://www.ebi.ac.uk/QuickGO/GTerm?id=GO:1903364	[]
7	5,6,7	positive regulation of triglyceride metabolic process	GO:0090208	0.00372	0.0161	1.54	0.29	4.84136	-12.6834	APOA1|10.8643;APOA4|3.2211	2	19	185	38520	http://www.ebi.ac.uk/QuickGO/GTerm?id=GO:0090208	[]
6	5,6	innate immune response in mucosa	GO:0002227	0.00372	0.0161	1.94	0.33	4.84136	-12.6834	LTF|26.7917;APOA4|3.2211	2	19	185	38520	http://www.ebi.ac.uk/QuickGO/GTerm?id=GO:0002227	[]
6	6	regulation of heterotypic cell-cell adhesion	GO:0034114	0.00372	0.0161	-0.47	0.09	4.84136	-12.6834	IL1RN|0.2729;APOA1|10.8643	2	19	185	38520	http://www.ebi.ac.uk/QuickGO/GTerm?id=GO:0034114	[]
5	5	cellular response to fluid shear stress	GO:0071498	0.00372	0.0161	-0.18	0.12	4.84136	-12.6834	SPP1|0.1738;CA2|8.7096	2	19	185	38520	http://www.ebi.ac.uk/QuickGO/GTerm?id=GO:0071498	[]
10	9,10	cellular zinc ion homeostasis	GO:0006882	0.00372	0.0161	-1.99	-0.06	4.84136	-12.6834	S100A9|0.0619;S100A8|0.1644	2	19	185	38520	http://www.ebi.ac.uk/QuickGO/GTerm?id=GO:0006882	[]
6	5,6	hematopoietic stem cell proliferation	GO:0071425	0.00372	0.0161	-0.48	0.09	4.84136	-12.6834	ACE|8.2414;PRG4|0.3631	2	19	185	38520	http://www.ebi.ac.uk/QuickGO/GTerm?id=GO:0071425	[]
6	6	regulation of superoxide metabolic process	GO:0090322	0.00372	0.0161	1.53	0.29	4.84136	-12.6834	PARK7|5.9704;SOD1|5.7016	2	19	185	38520	http://www.ebi.ac.uk/QuickGO/GTerm?id=GO:0090322	[]
7	7	ribonucleoside triphosphate metabolic process	GO:0009199	0.00378	0.0164	3.31	0.46	4.84136	-12.6834	PKM|4.9659;ALDOA|2.9923;PGK1|2.0324;PARK7|5.9704;HSPA8|2.3988;TPI1|2.0893;GAPDH|2.2699	7	409	185	38520	http://www.ebi.ac.uk/QuickGO/GTerm?id=GO:0009199	[]
8	6,8	defense response to Gram-positive bacterium	GO:0050830	0.00383	0.0165	-2.26	-0.09	4.84136	-12.6834	PGLYRP1|0.1722;PGLYRP2|0.3945;MMP7|0.0817	3	65	185	38520	http://www.ebi.ac.uk/QuickGO/GTerm?id=GO:0050830	[]
3	3	hormone metabolic process	GO:0042445	0.00385	0.0166	2.4	0.37	4.84136	-12.6834	MME|2.2284;CPQ|0.3565;ACE|8.2414;CPE|21.0863;KLK6|0.0112	5	214	185	38520	http://www.ebi.ac.uk/QuickGO/GTerm?id=GO:0042445	[]
7	7	purine nucleoside triphosphate metabolic process	GO:0009144	0.00388	0.0167	3.31	0.46	4.84136	-12.6834	PKM|4.9659;ALDOA|2.9923;PGK1|2.0324;PARK7|5.9704;HSPA8|2.3988;TPI1|2.0893;GAPDH|2.2699	7	411	185	38520	http://www.ebi.ac.uk/QuickGO/GTerm?id=GO:0009144	[]
8	8	purine ribonucleoside monophosphate metabolic process	GO:0009167	0.00393	0.0169	3.31	0.46	4.84136	-12.6834	PKM|4.9659;ALDOA|2.9923;PGK1|2.0324;PARK7|5.9704;HSPA8|2.3988;TPI1|2.0893;GAPDH|2.2699	7	412	185	38520	http://www.ebi.ac.uk/QuickGO/GTerm?id=GO:0009167	[]
5	5	regulation of cell development	GO:0060284	0.00395	0.017	-10.27	-0.87	4.84136	-12.6834	OLFM4|10.7647;LTF|26.7917;SERPINB3|0.0377;SPP1|0.1738;FN1|2.3988;VASN|0.0982;APOE|0.5105;APOA1|10.8643;PI16|0.182;NEU1|0.597;KLK6|0.0112	11	888	185	38520	http://www.ebi.ac.uk/QuickGO/GTerm?id=GO:0060284	[]
7	7	purine nucleoside monophosphate metabolic process	GO:0009126	0.00398	0.0171	3.31	0.46	4.84136	-12.6834	PKM|4.9659;ALDOA|2.9923;PGK1|2.0324;PARK7|5.9704;HSPA8|2.3988;TPI1|2.0893;GAPDH|2.2699	7	413	185	38520	http://www.ebi.ac.uk/QuickGO/GTerm?id=GO:0009126	[]
5	5	inner ear receptor cell differentiation	GO:0060113	0.00399	0.0171	0.26	0.16	4.84136	-12.6834	SLC9A3R1|3.8726;SOD1|5.7016;NAGLU|0.5546	3	66	185	38520	http://www.ebi.ac.uk/QuickGO/GTerm?id=GO:0060113	[]
5	5	nucleoside phosphate metabolic process	GO:0006753	0.004	0.0171	9.92	1.11	4.84136	-12.6834	PKM|4.9659;ALDOA|2.9923;MDH1|2.7542;AQP1|0.0133;PGK1|2.0324;PARK7|5.9704;HSPA8|2.3988;TPI1|2.0893;GAPDH|2.2699;ACPP|64.2688;CAT|22.4905;APOE|0.5105;IDH1|6.9183	13	1154	185	38520	http://www.ebi.ac.uk/QuickGO/GTerm?id=GO:0006753	[]
4	4	regulation of response to biotic stimulus	GO:0002831	0.00409	0.0175	1.07	0.24	4.84136	-12.6834	MYLK|0.7516;MDH1|2.7542;LTF|26.7917;ANXA5|14.0605;KRT6A|0.1127	5	217	185	38520	http://www.ebi.ac.uk/QuickGO/GTerm?id=GO:0002831	[]
8	8	regulation of cholesterol efflux	GO:0010874	0.00412	0.0175	-0.39	0.1	4.84136	-12.6834	EGF|0.7943;APOE|0.5105	2	20	185	38520	http://www.ebi.ac.uk/QuickGO/GTerm?id=GO:0010874	[]
6	6	vitamin D metabolic process	GO:0042359	0.00412	0.0175	-1.81	-0.04	4.84136	-12.6834	CUBN|0.1067;LRP2|0.1459	2	20	185	38520	http://www.ebi.ac.uk/QuickGO/GTerm?id=GO:0042359	[]
5	4,5	decidualization	GO:0046697	0.00412	0.0175	-1.27	0.01	4.84136	-12.6834	CTSB|0.3105;SPP1|0.1738	2	20	185	38520	http://www.ebi.ac.uk/QuickGO/GTerm?id=GO:0046697	[]
8	8	regulation of systemic arterial blood pressure by circulatory renin-angiotensin	GO:0001991	0.00412	0.0175	1.26	0.26	4.84136	-12.6834	MME|2.2284;ACE|8.2414	2	20	185	38520	http://www.ebi.ac.uk/QuickGO/GTerm?id=GO:0001991	[]
8	6,7,8	negative regulation of oxidative stress-induced intrinsic apoptotic signaling pathway	GO:1902176	0.00412	0.0175	-0.36	0.1	4.84136	-12.6834	HSPB1|0.3837;PARK7|5.9704	2	20	185	38520	http://www.ebi.ac.uk/QuickGO/GTerm?id=GO:1902176	[]
6	6	establishment of epithelial cell polarity	GO:0090162	0.00412	0.0175	1.18	0.25	4.84136	-12.6834	MSN|3.9084;SLC9A3R1|3.8726	2	20	185	38520	http://www.ebi.ac.uk/QuickGO/GTerm?id=GO:0090162	[]
7	6,7	regulation of phosphate metabolic process	GO:0019220	0.00414	0.0176	7.25	0.85	4.84136	-12.6834	VTN|0.0809;LTF|26.7917;AHSG|0.1432;ACE|8.2414;HSPB1|0.3837;SERPINB3|0.0377;PARK7|5.9704;EGF|0.7943;TFF2|0.2655;FN1|2.3988;SLC9A3R1|3.8726;PRDX1|2.9107;SPINK1|0.0113;SOD1|5.7016;IL1RN|0.2729;APOE|0.5105;APOA1|10.8643;C3|1.3804;IDH1|6.9183	19	2023	185	38520	http://www.ebi.ac.uk/QuickGO/GTerm?id=GO:0019220	[]
6	6	activation of mitophagy in response to mitochondrial depolarization	GO:0098779	0.00418	0.0177	-0.52	0.08	4.84136	-12.6834	MYLK|0.7516;MDH1|2.7542;ANXA5|14.0605;KRT6A|0.1127	4	135	185	38520	http://www.ebi.ac.uk/QuickGO/GTerm?id=GO:0098779	[]
5	5	response to mitochondrial depolarisation	GO:0098780	0.00418	0.0177	-0.52	0.08	4.84136	-12.6834	MYLK|0.7516;MDH1|2.7542;ANXA5|14.0605;KRT6A|0.1127	4	135	185	38520	http://www.ebi.ac.uk/QuickGO/GTerm?id=GO:0098780	[]
8	7,8	negative regulation of phosphorylation	GO:0042326	0.00431	0.0182	-6.29	-0.48	4.84136	-12.6834	AHSG|0.1432;HSPB1|0.3837;SERPINB3|0.0377;PARK7|5.9704;SLC9A3R1|3.8726;SPINK1|0.0113;APOE|0.5105	7	419	185	38520	http://www.ebi.ac.uk/QuickGO/GTerm?id=GO:0042326	[]
6	5,6	regulation of phosphorus metabolic process	GO:0051174	0.00443	0.0183	7.25	0.85	4.84136	-12.6834	VTN|0.0809;LTF|26.7917;AHSG|0.1432;ACE|8.2414;HSPB1|0.3837;SERPINB3|0.0377;PARK7|5.9704;EGF|0.7943;TFF2|0.2655;FN1|2.3988;SLC9A3R1|3.8726;PRDX1|2.9107;SPINK1|0.0113;SOD1|5.7016;IL1RN|0.2729;APOE|0.5105;APOA1|10.8643;C3|1.3804;IDH1|6.9183	19	2036	185	38520	http://www.ebi.ac.uk/QuickGO/GTerm?id=GO:0051174	[]
7	5,6,7	regulation of protein transport	GO:0051223	0.00446	0.0183	5.14	0.64	4.84136	-12.6834	PDZK1|11.695;CD14|0.8241;LCP1|3.5645;PARK7|5.9704;EGF|0.7943;CDH1|0.8091;FN1|2.3988;SLC9A3R1|3.8726;PRDX1|2.9107;APOA1|10.8643	10	775	185	38520	http://www.ebi.ac.uk/QuickGO/GTerm?id=GO:0051223	[]
5	5	cellular response to nitrogen compound	GO:1901699	0.00452	0.0183	-6.41	-0.49	4.84136	-12.6834	COL6A1|0.3162;AHSG|0.1432;AQP1|0.0133;FOLR1|0.2188;AOC1|2.0701;CDH1|0.8091;FBN1|0.1585;SOD1|5.7016;IL1RN|0.2729	9	653	185	38520	http://www.ebi.ac.uk/QuickGO/GTerm?id=GO:1901699	[]
5	5	phosphatidylcholine metabolic process	GO:0046470	0.00453	0.0183	1.53	0.29	4.84136	-12.6834	FABP5|0.0296;APOA1|10.8643;APOA4|3.2211	3	69	185	38520	http://www.ebi.ac.uk/QuickGO/GTerm?id=GO:0046470	[]
5	4,5	lipid storage	GO:0019915	0.00453	0.0183	1.32	0.26	4.84136	-12.6834	APOA1|10.8643;C3|1.3804;HEXB|1.3804	3	69	185	38520	http://www.ebi.ac.uk/QuickGO/GTerm?id=GO:0019915	[]
8	7,8	vasodilation	GO:0042311	0.00453	0.0183	0.29	0.16	4.84136	-12.6834	ACE|8.2414;SOD1|5.7016;APOE|0.5105	3	69	185	38520	http://www.ebi.ac.uk/QuickGO/GTerm?id=GO:0042311	[]
6	6	response to vitamin A	GO:0033189	0.00454	0.0183	-0.69	0.07	4.84136	-12.6834	CAT|22.4905;SERPINA7|0.2188	2	21	185	38520	http://www.ebi.ac.uk/QuickGO/GTerm?id=GO:0033189	[]
9	9	zinc ion homeostasis	GO:0055069	0.00454	0.0183	-1.99	-0.06	4.84136	-12.6834	S100A9|0.0619;S100A8|0.1644	2	21	185	38520	http://www.ebi.ac.uk/QuickGO/GTerm?id=GO:0055069	[]
6	6	purine nucleotide metabolic process	GO:0006163	0.00454	0.0183	6.83	0.81	4.84136	-12.6834	PKM|4.9659;ALDOA|2.9923;AQP1|0.0133;PGK1|2.0324;PARK7|5.9704;HSPA8|2.3988;TPI1|2.0893;GAPDH|2.2699;CAT|22.4905;APOE|0.5105	10	777	185	38520	http://www.ebi.ac.uk/QuickGO/GTerm?id=GO:0006163	[]
3	3	negative regulation of developmental process	GO:0051093	0.00458	0.0183	-10.17	-0.86	4.84136	-12.6834	PGLYRP1|0.1722;LTF|26.7917;PGLYRP2|0.3945;AHSG|0.1432;KLK3|65.4636;SPINK5|0.1406;SPP1|0.1738;VASN|0.0982;TIMP1|18.197;APOE|0.5105;PI16|0.182	11	906	185	38520	http://www.ebi.ac.uk/QuickGO/GTerm?id=GO:0051093	[]
3	3	immune system development	GO:0002520	0.00466	0.0183	8.26	0.95	4.84136	-12.6834	PGLYRP1|0.1722;LTF|26.7917;PGLYRP2|0.3945;ACE|8.2414;VCAM1|9.4624;PRG4|0.3631;SPINK5|0.1406;CA2|8.7096;SOD1|5.7016;GLO1|4.4463;C3|1.3804	11	908	185	38520	http://www.ebi.ac.uk/QuickGO/GTerm?id=GO:0002520	[]
6	5,6	regulation of innate immune response	GO:0045088	0.00471	0.0183	-3.2	-0.18	4.84136	-12.6834	CTSB|0.3105;CD14|0.8241;PGLYRP1|0.1722;LTF|26.7917;PGLYRP2|0.3945;LAMP1|2.6062;A2M|22.9087	7	426	185	38520	http://www.ebi.ac.uk/QuickGO/GTerm?id=GO:0045088	[]
4	4	positive regulation of molecular function	GO:0044093	0.00478	0.0183	-18.03	-1.64	4.84136	-12.6834	SEMG1|41.6869;CD14|0.8241;GSN|0.0718;S100A9|0.0619;VTN|0.0809;LTF|26.7917;CTSC|0.3076;ACE|8.2414;CTSH|0.4699;SERPINB3|0.0377;PARK7|5.9704;EGF|0.7943;CTSA|0.4571;FN1|2.3988;CAT|22.4905;SOD1|5.7016;IL1RN|0.2729;APOE|0.5105;SH3BGRL3|0.0409;APOA1|10.8643;S100A8|0.1644;APOA4|3.2211	22	2514	185	38520	http://www.ebi.ac.uk/QuickGO/GTerm?id=GO:0044093	[]
7	6,7	positive regulation of dopamine biosynthetic process	GO:1903181	0.0048	0.0183	0	0.14	4.84136	-12.6834	PARK7|5.9704	1	1	185	38520	http://www.ebi.ac.uk/QuickGO/GTerm?id=GO:1903181	[]
9	6,7,8,9	positive regulation of androgen receptor activity	GO:2000825	0.0048	0.0183	0	0.14	4.84136	-12.6834	PARK7|5.9704	1	1	185	38520	http://www.ebi.ac.uk/QuickGO/GTerm?id=GO:2000825	[]
7	5,7	detoxification of mercury ion	GO:0050787	0.0048	0.0183	0	0.14	4.84136	-12.6834	PARK7|5.9704	1	1	185	38520	http://www.ebi.ac.uk/QuickGO/GTerm?id=GO:0050787	[]
7	7	primary alcohol biosynthetic process	GO:0034309	0.0048	0.0183	0	0.14	4.84136	-12.6834	PARK7|5.9704	1	1	185	38520	http://www.ebi.ac.uk/QuickGO/GTerm?id=GO:0034309	[]
8	6,7,8	cellular response to copper ion starvation	GO:0035874	0.0048	0.0183	0	0.14	4.84136	-12.6834	AOC1|2.0701	1	1	185	38520	http://www.ebi.ac.uk/QuickGO/GTerm?id=GO:0035874	[]
6	6	glyoxal catabolic process	GO:1903190	0.0048	0.0183	0	0.14	4.84136	-12.6834	PARK7|5.9704	1	1	185	38520	http://www.ebi.ac.uk/QuickGO/GTerm?id=GO:1903190	[]
6	6	plasma membrane raft distribution	GO:0044855	0.0048	0.0183	0	0.14	4.84136	-12.6834	GSN|0.0718	1	1	185	38520	http://www.ebi.ac.uk/QuickGO/GTerm?id=GO:0044855	[]
7	6,7	negative regulation of dendritic spine maintenance	GO:1902951	0.0048	0.0183	0	0.14	4.84136	-12.6834	APOE|0.5105	1	1	185	38520	http://www.ebi.ac.uk/QuickGO/GTerm?id=GO:1902951	[]
7	6,7	regulation of dopamine biosynthetic process	GO:1903179	0.0048	0.0183	0	0.14	4.84136	-12.6834	PARK7|5.9704	1	1	185	38520	http://www.ebi.ac.uk/QuickGO/GTerm?id=GO:1903179	[]
6	5,6	vacuolar sequestering	GO:0043181	0.0048	0.0183	0	0.14	4.84136	-12.6834	GAA|0.6026	1	1	185	38520	http://www.ebi.ac.uk/QuickGO/GTerm?id=GO:0043181	[]
6	5,6	positive regulation of postsynaptic membrane organization	GO:1901628	0.0048	0.0183	0	0.14	4.84136	-12.6834	APOE|0.5105	1	1	185	38520	http://www.ebi.ac.uk/QuickGO/GTerm?id=GO:1901628	[]
7	6,7	positive regulation of pyrroline-5-carboxylate reductase activity	GO:1903168	0.0048	0.0183	0	0.14	4.84136	-12.6834	PARK7|5.9704	1	1	185	38520	http://www.ebi.ac.uk/QuickGO/GTerm?id=GO:1903168	[]
7	7	TRAIL receptor biosynthetic process	GO:0045557	0.0048	0.0183	0	0.14	4.84136	-12.6834	PARK7|5.9704	1	1	185	38520	http://www.ebi.ac.uk/QuickGO/GTerm?id=GO:0045557	[]
10	6,7,8,9,10	negative regulation of phospholipid efflux	GO:1902999	0.0048	0.0183	0	0.14	4.84136	-12.6834	APOE|0.5105	1	1	185	38520	http://www.ebi.ac.uk/QuickGO/GTerm?id=GO:1902999	[]
5	5	response to silicon dioxide	GO:0034021	0.0048	0.0183	0	0.14	4.84136	-12.6834	SCGB1A1|8.5507	1	1	185	38520	http://www.ebi.ac.uk/QuickGO/GTerm?id=GO:0034021	[]
11	6,7,9,10,11	neural crest cell migration involved in heart formation	GO:0003147	0.0048	0.0183	0	0.14	4.84136	-12.6834	FOLR1|0.2188	1	1	185	38520	http://www.ebi.ac.uk/QuickGO/GTerm?id=GO:0003147	[]
5	5	keratinocyte activation	GO:0032980	0.0048	0.0183	0	0.14	4.84136	-12.6834	KRT2|13.0617	1	1	185	38520	http://www.ebi.ac.uk/QuickGO/GTerm?id=GO:0032980	[]
6	6	antibacterial peptide secretion	GO:0002779	0.0048	0.0183	0	0.14	4.84136	-12.6834	MMP7|0.0817	1	1	185	38520	http://www.ebi.ac.uk/QuickGO/GTerm?id=GO:0002779	[]
4	4	descending thin limb development	GO:0072022	0.0048	0.0183	0	0.14	4.84136	-12.6834	AQP1|0.0133	1	1	185	38520	http://www.ebi.ac.uk/QuickGO/GTerm?id=GO:0072022	[]
5	5	response to azide	GO:0097184	0.0048	0.0183	0	0.14	4.84136	-12.6834	AOC1|2.0701	1	1	185	38520	http://www.ebi.ac.uk/QuickGO/GTerm?id=GO:0097184	[]
7	6,7	methylglyoxal catabolic process to lactate	GO:0061727	0.0048	0.0183	0	0.14	4.84136	-12.6834	PARK7|5.9704	1	1	185	38520	http://www.ebi.ac.uk/QuickGO/GTerm?id=GO:0061727	[]
8	6,7,8	transepithelial water transport	GO:0035377	0.0048	0.0183	0	0.14	4.84136	-12.6834	AQP1|0.0133	1	1	185	38520	http://www.ebi.ac.uk/QuickGO/GTerm?id=GO:0035377	[]
12	8,9,10,11,12	negative regulation of TRAIL-activated apoptotic signaling pathway	GO:1903122	0.0048	0.0183	0	0.14	4.84136	-12.6834	PARK7|5.9704	1	1	185	38520	http://www.ebi.ac.uk/QuickGO/GTerm?id=GO:1903122	[]
7	7	cellular response to folic acid	GO:0071231	0.0048	0.0183	0	0.14	4.84136	-12.6834	FOLR1|0.2188	1	1	185	38520	http://www.ebi.ac.uk/QuickGO/GTerm?id=GO:0071231	[]
5	5	glyoxal metabolic process	GO:1903189	0.0048	0.0183	0	0.14	4.84136	-12.6834	PARK7|5.9704	1	1	185	38520	http://www.ebi.ac.uk/QuickGO/GTerm?id=GO:1903189	[]
12	11,12	iron assimilation	GO:0033212	0.0048	0.0183	0	0.14	4.84136	-12.6834	LTF|26.7917	1	1	185	38520	http://www.ebi.ac.uk/QuickGO/GTerm?id=GO:0033212	[]
8	7,8	L-xylitol catabolic process	GO:0051160	0.0048	0.0183	0	0.14	4.84136	-12.6834	SORD|13.1826	1	1	185	38520	http://www.ebi.ac.uk/QuickGO/GTerm?id=GO:0051160	[]
6	6	regulation of pyrroline-5-carboxylate reductase activity	GO:1903167	0.0048	0.0183	0	0.14	4.84136	-12.6834	PARK7|5.9704	1	1	185	38520	http://www.ebi.ac.uk/QuickGO/GTerm?id=GO:1903167	[]
5	4,5	negative regulation of cell adhesion molecule production	GO:0060354	0.0048	0.0183	0	0.14	4.84136	-12.6834	APOA1|10.8643	1	1	185	38520	http://www.ebi.ac.uk/QuickGO/GTerm?id=GO:0060354	[]
6	6	cellular response to glyoxal	GO:0036471	0.0048	0.0183	0	0.14	4.84136	-12.6834	PARK7|5.9704	1	1	185	38520	http://www.ebi.ac.uk/QuickGO/GTerm?id=GO:0036471	[]
7	7	plasma membrane raft polarization	GO:0044858	0.0048	0.0183	0	0.14	4.84136	-12.6834	GSN|0.0718	1	1	185	38520	http://www.ebi.ac.uk/QuickGO/GTerm?id=GO:0044858	[]
7	6,7	positive regulation of L-dopa decarboxylase activity	GO:1903200	0.0048	0.0183	0	0.14	4.84136	-12.6834	PARK7|5.9704	1	1	185	38520	http://www.ebi.ac.uk/QuickGO/GTerm?id=GO:1903200	[]
9	8,9	tripeptide transport	GO:0042939	0.0048	0.0183	0	0.14	4.84136	-12.6834	SLC9A3R1|3.8726	1	1	185	38520	http://www.ebi.ac.uk/QuickGO/GTerm?id=GO:0042939	[]
8	7,8	sorbitol catabolic process	GO:0006062	0.0048	0.0183	0	0.14	4.84136	-12.6834	SORD|13.1826	1	1	185	38520	http://www.ebi.ac.uk/QuickGO/GTerm?id=GO:0006062	[]
6	5,6	regulation of death-inducing signaling complex assembly	GO:1903072	0.0048	0.0183	0	0.14	4.84136	-12.6834	PARK7|5.9704	1	1	185	38520	http://www.ebi.ac.uk/QuickGO/GTerm?id=GO:1903072	[]
7	6,7	pentitol catabolic process	GO:0019527	0.0048	0.0183	0	0.14	4.84136	-12.6834	SORD|13.1826	1	1	185	38520	http://www.ebi.ac.uk/QuickGO/GTerm?id=GO:0019527	[]
6	6	glutathione catabolic process	GO:0006751	0.0048	0.0183	0	0.14	4.84136	-12.6834	GGT1|5.0582	1	1	185	38520	http://www.ebi.ac.uk/QuickGO/GTerm?id=GO:0006751	[]
6	6	enzyme active site formation via L-cysteine sulfinic acid	GO:0018323	0.0048	0.0183	0	0.14	4.84136	-12.6834	PARK7|5.9704	1	1	185	38520	http://www.ebi.ac.uk/QuickGO/GTerm?id=GO:0018323	[]
6	6	maintenance of symbiont-containing vacuole by host	GO:0085018	0.0048	0.0183	0	0.14	4.84136	-12.6834	AQP1|0.0133	1	1	185	38520	http://www.ebi.ac.uk/QuickGO/GTerm?id=GO:0085018	[]
6	6	metanephric proximal convoluted tubule segment 2 development	GO:0072232	0.0048	0.0183	0	0.14	4.84136	-12.6834	AQP1|0.0133	1	1	185	38520	http://www.ebi.ac.uk/QuickGO/GTerm?id=GO:0072232	[]
7	5,6,7	regulation of receptor clustering	GO:1903909	0.0048	0.0183	0	0.14	4.84136	-12.6834	GSN|0.0718	1	1	185	38520	http://www.ebi.ac.uk/QuickGO/GTerm?id=GO:1903909	[]
7	7	renal phosphate ion absorption	GO:0097291	0.0048	0.0183	0	0.14	4.84136	-12.6834	SLC9A3R1|3.8726	1	1	185	38520	http://www.ebi.ac.uk/QuickGO/GTerm?id=GO:0097291	[]
10	6,7,8,9,10	negative regulation of death-inducing signaling complex assembly	GO:1903073	0.0048	0.0183	0	0.14	4.84136	-12.6834	PARK7|5.9704	1	1	185	38520	http://www.ebi.ac.uk/QuickGO/GTerm?id=GO:1903073	[]
7	5,7	negative regulation of lipid transport across blood brain barrier	GO:1903001	0.0048	0.0183	0	0.14	4.84136	-12.6834	APOE|0.5105	1	1	185	38520	http://www.ebi.ac.uk/QuickGO/GTerm?id=GO:1903001	[]
6	5,6	negative regulation of postsynaptic membrane organization	GO:1901627	0.0048	0.0183	0	0.14	4.84136	-12.6834	APOE|0.5105	1	1	185	38520	http://www.ebi.ac.uk/QuickGO/GTerm?id=GO:1901627	[]
6	6	methylglyoxal catabolic process	GO:0051596	0.0048	0.0183	0	0.14	4.84136	-12.6834	PARK7|5.9704	1	1	185	38520	http://www.ebi.ac.uk/QuickGO/GTerm?id=GO:0051596	[]
5	5	positive regulation of oxidative phosphorylation uncoupler activity	GO:2000277	0.0048	0.0183	0	0.14	4.84136	-12.6834	PARK7|5.9704	1	1	185	38520	http://www.ebi.ac.uk/QuickGO/GTerm?id=GO:2000277	[]
8	7,8	metanephric proximal straight tubule development	GO:0072230	0.0048	0.0183	0	0.14	4.84136	-12.6834	AQP1|0.0133	1	1	185	38520	http://www.ebi.ac.uk/QuickGO/GTerm?id=GO:0072230	[]
11	8,9,10,11	negative regulation of keratinocyte apoptotic process	GO:1902173	0.0048	0.0183	0	0.14	4.84136	-12.6834	SERPINB13|0.3373	1	1	185	38520	http://www.ebi.ac.uk/QuickGO/GTerm?id=GO:1902173	[]
9	5,8,9	metanephric descending thin limb development	GO:0072220	0.0048	0.0183	0	0.14	4.84136	-12.6834	AQP1|0.0133	1	1	185	38520	http://www.ebi.ac.uk/QuickGO/GTerm?id=GO:0072220	[]
6	6	regulation of lipid transport across blood brain barrier	GO:1903000	0.0048	0.0183	0	0.14	4.84136	-12.6834	APOE|0.5105	1	1	185	38520	http://www.ebi.ac.uk/QuickGO/GTerm?id=GO:1903000	[]
8	7,8	positive regulation of tyrosine 3-monooxygenase activity	GO:1903178	0.0048	0.0183	0	0.14	4.84136	-12.6834	PARK7|5.9704	1	1	185	38520	http://www.ebi.ac.uk/QuickGO/GTerm?id=GO:1903178	[]
9	5,6,7,8,9	negative regulation of phospholipid transport	GO:2001139	0.0048	0.0183	0	0.14	4.84136	-12.6834	APOE|0.5105	1	1	185	38520	http://www.ebi.ac.uk/QuickGO/GTerm?id=GO:2001139	[]
6	5,6	pentitol metabolic process	GO:0019519	0.0048	0.0183	0	0.14	4.84136	-12.6834	SORD|13.1826	1	1	185	38520	http://www.ebi.ac.uk/QuickGO/GTerm?id=GO:0019519	[]
7	6,7	negative regulation of fibril organization	GO:1902904	0.0048	0.0183	0	0.14	4.84136	-12.6834	HSPA8|2.3988	1	1	185	38520	http://www.ebi.ac.uk/QuickGO/GTerm?id=GO:1902904	[]
10	6,7,9,10	glutathione transport	GO:0034635	0.0048	0.0183	0	0.14	4.84136	-12.6834	SLC9A3R1|3.8726	1	1	185	38520	http://www.ebi.ac.uk/QuickGO/GTerm?id=GO:0034635	[]
7	5,6,7	sucrose metabolic process	GO:0005985	0.0048	0.0183	0	0.14	4.84136	-12.6834	GAA|0.6026	1	1	185	38520	http://www.ebi.ac.uk/QuickGO/GTerm?id=GO:0005985	[]
6	6	plasma membrane raft localization	GO:0044856	0.0048	0.0183	0	0.14	4.84136	-12.6834	GSN|0.0718	1	1	185	38520	http://www.ebi.ac.uk/QuickGO/GTerm?id=GO:0044856	[]
6	5,6	L-dopa metabolic process	GO:1903184	0.0048	0.0183	0	0.14	4.84136	-12.6834	PARK7|5.9704	1	1	185	38520	http://www.ebi.ac.uk/QuickGO/GTerm?id=GO:1903184	[]
5	5	proximal convoluted tubule segment 2 development	GO:0072032	0.0048	0.0183	0	0.14	4.84136	-12.6834	AQP1|0.0133	1	1	185	38520	http://www.ebi.ac.uk/QuickGO/GTerm?id=GO:0072032	[]
8	7,8	regulation of L-dopa biosynthetic process	GO:1903195	0.0048	0.0183	0	0.14	4.84136	-12.6834	PARK7|5.9704	1	1	185	38520	http://www.ebi.ac.uk/QuickGO/GTerm?id=GO:1903195	[]
6	6	regulation of L-dopa decarboxylase activity	GO:1903198	0.0048	0.0183	0	0.14	4.84136	-12.6834	PARK7|5.9704	1	1	185	38520	http://www.ebi.ac.uk/QuickGO/GTerm?id=GO:1903198	[]
7	6,7	male courtship behavior	GO:0008049	0.0048	0.0183	0	0.14	4.84136	-12.6834	HEXB|1.3804	1	1	185	38520	http://www.ebi.ac.uk/QuickGO/GTerm?id=GO:0008049	[]
8	8	glycolate biosynthetic process	GO:0046295	0.0048	0.0183	0	0.14	4.84136	-12.6834	PARK7|5.9704	1	1	185	38520	http://www.ebi.ac.uk/QuickGO/GTerm?id=GO:0046295	[]
9	5,7,8,9	antimicrobial peptide secretion	GO:0002776	0.0048	0.0183	0	0.14	4.84136	-12.6834	MMP7|0.0817	1	1	185	38520	http://www.ebi.ac.uk/QuickGO/GTerm?id=GO:0002776	[]
8	6,7,8	negative regulation of tumor necrosis factor (ligand) superfamily member 11 production	GO:2000308	0.0048	0.0183	0	0.14	4.84136	-12.6834	LTF|26.7917	1	1	185	38520	http://www.ebi.ac.uk/QuickGO/GTerm?id=GO:2000308	[]
7	6,7	L-dopa biosynthetic process	GO:1903185	0.0048	0.0183	0	0.14	4.84136	-12.6834	PARK7|5.9704	1	1	185	38520	http://www.ebi.ac.uk/QuickGO/GTerm?id=GO:1903185	[]
9	7,8,9	starch catabolic process	GO:0005983	0.0048	0.0183	0	0.14	4.84136	-12.6834	MGAM|3.5318	1	1	185	38520	http://www.ebi.ac.uk/QuickGO/GTerm?id=GO:0005983	[]
8	5,8	regulation of plasma membrane raft polarization	GO:1903906	0.0048	0.0183	0	0.14	4.84136	-12.6834	GSN|0.0718	1	1	185	38520	http://www.ebi.ac.uk/QuickGO/GTerm?id=GO:1903906	[]
5	5	positive regulation of lipid transport across blood brain barrier	GO:1903002	0.0048	0.0183	0	0.14	4.84136	-12.6834	APOE|0.5105	1	1	185	38520	http://www.ebi.ac.uk/QuickGO/GTerm?id=GO:1903002	[]
6	6	positive regulation of dendritic spine maintenance	GO:1902952	0.0048	0.0183	0	0.14	4.84136	-12.6834	APOE|0.5105	1	1	185	38520	http://www.ebi.ac.uk/QuickGO/GTerm?id=GO:1902952	[]
8	7,8	positive regulation of L-dopa biosynthetic process	GO:1903197	0.0048	0.0183	0	0.14	4.84136	-12.6834	PARK7|5.9704	1	1	185	38520	http://www.ebi.ac.uk/QuickGO/GTerm?id=GO:1903197	[]
7	6,7	hexitol catabolic process	GO:0019407	0.0048	0.0183	0	0.14	4.84136	-12.6834	SORD|13.1826	1	1	185	38520	http://www.ebi.ac.uk/QuickGO/GTerm?id=GO:0019407	[]
8	7,8	starch metabolic process	GO:0005982	0.0048	0.0183	0	0.14	4.84136	-12.6834	MGAM|3.5318	1	1	185	38520	http://www.ebi.ac.uk/QuickGO/GTerm?id=GO:0005982	[]
4	4	psychomotor behavior	GO:0036343	0.0048	0.0183	0	0.14	4.84136	-12.6834	DPP4|2.3335	1	1	185	38520	http://www.ebi.ac.uk/QuickGO/GTerm?id=GO:0036343	[]
13	12,13	iron assimilation by chelation and transport	GO:0033214	0.0048	0.0183	0	0.14	4.84136	-12.6834	LTF|26.7917	1	1	185	38520	http://www.ebi.ac.uk/QuickGO/GTerm?id=GO:0033214	[]
8	6,7,8	negative regulation of gap junction assembly	GO:1903597	0.0048	0.0183	0	0.14	4.84136	-12.6834	ACE|8.2414	1	1	185	38520	http://www.ebi.ac.uk/QuickGO/GTerm?id=GO:1903597	[]
8	6,7,8	regulation of TRAIL receptor biosynthetic process	GO:0045560	0.0048	0.0183	0	0.14	4.84136	-12.6834	PARK7|5.9704	1	1	185	38520	http://www.ebi.ac.uk/QuickGO/GTerm?id=GO:0045560	[]
6	6	negative regulation of collateral sprouting of intact axon in response to injury	GO:0048685	0.0048	0.0183	0	0.14	4.84136	-12.6834	SPP1|0.1738	1	1	185	38520	http://www.ebi.ac.uk/QuickGO/GTerm?id=GO:0048685	[]
6	6	cellular response to azide	GO:0097185	0.0048	0.0183	0	0.14	4.84136	-12.6834	AOC1|2.0701	1	1	185	38520	http://www.ebi.ac.uk/QuickGO/GTerm?id=GO:0097185	[]
8	7,8	proximal straight tubule development	GO:0072020	0.0048	0.0183	0	0.14	4.84136	-12.6834	AQP1|0.0133	1	1	185	38520	http://www.ebi.ac.uk/QuickGO/GTerm?id=GO:0072020	[]
8	7,8	methylglyoxal catabolic process to D-lactate via S-lactoyl-glutathione	GO:0019243	0.0048	0.0183	0	0.14	4.84136	-12.6834	PARK7|5.9704	1	1	185	38520	http://www.ebi.ac.uk/QuickGO/GTerm?id=GO:0019243	[]
6	6	regulation of dendritic spine maintenance	GO:1902950	0.0048	0.0183	0	0.14	4.84136	-12.6834	APOE|0.5105	1	1	185	38520	http://www.ebi.ac.uk/QuickGO/GTerm?id=GO:1902950	[]
8	6,8	positive regulation of cellular amino acid biosynthetic process	GO:2000284	0.0048	0.0183	0	0.14	4.84136	-12.6834	PARK7|5.9704	1	1	185	38520	http://www.ebi.ac.uk/QuickGO/GTerm?id=GO:2000284	[]
7	6,7	L-xylitol metabolic process	GO:0051164	0.0048	0.0183	0	0.14	4.84136	-12.6834	SORD|13.1826	1	1	185	38520	http://www.ebi.ac.uk/QuickGO/GTerm?id=GO:0051164	[]
7	7	regulation of tyrosine 3-monooxygenase activity	GO:1903176	0.0048	0.0183	0	0.14	4.84136	-12.6834	PARK7|5.9704	1	1	185	38520	http://www.ebi.ac.uk/QuickGO/GTerm?id=GO:1903176	[]
5	5	cytoskeleton organization	GO:0007010	0.00481	0.0183	-14.94	-1.33	4.84136	-12.6834	KRT16|0.1995;ALDOA|2.9923;GSN|0.0718;PDCD6IP|2.0701;MYLK|0.7516;S100A9|0.0619;LCP1|3.5645;AQP1|0.0133;RDX|1.5704;KRT13|0.0373;CRYAB|0.2333;GAPDH|2.2699;KRT4|0.0817;SLC9A3R1|3.8726;SOD1|5.7016;APOE|0.5105;SH3BGRL3|0.0409;APOA1|10.8643;S100A8|0.1644	19	2052	185	38520	http://www.ebi.ac.uk/QuickGO/GTerm?id=GO:0007010	[]
5	4,5	positive regulation of catalytic activity	GO:0043085	0.00482	0.0183	-15.59	-1.4	4.84136	-12.6834	SEMG1|41.6869;CD14|0.8241;GSN|0.0718;S100A9|0.0619;LTF|26.7917;CTSC|0.3076;ACE|8.2414;CTSH|0.4699;SERPINB3|0.0377;PARK7|5.9704;EGF|0.7943;CTSA|0.4571;FN1|2.3988;SOD1|5.7016;IL1RN|0.2729;APOE|0.5105;SH3BGRL3|0.0409;APOA1|10.8643;S100A8|0.1644;APOA4|3.2211	20	2205	185	38520	http://www.ebi.ac.uk/QuickGO/GTerm?id=GO:0043085	[]
5	5	response to ketone	GO:1901654	0.00487	0.0185	1.8	0.31	4.84136	-12.6834	MSN|3.9084;AQP1|0.0133;SERPINA7|0.2188;C3|1.3804	4	141	185	38520	http://www.ebi.ac.uk/QuickGO/GTerm?id=GO:1901654	[]
8	6,8	neuron differentiation	GO:0030182	0.00491	0.0186	-9.47	-0.8	4.84136	-12.6834	HSP90AA1|2.466;COL6A1|0.3162;HSPA8|2.3988;SPINK5|0.1406;CDH1|0.8091;SPP1|0.1738;FN1|2.3988;SLC9A3R1|3.8726;SOD1|5.7016;APOE|0.5105;APOA1|10.8643;CDH11|0.3105;APOA4|3.2211;NEU1|0.597;NAGLU|0.5546;KLK6|0.0112	16	1609	185	38520	http://www.ebi.ac.uk/QuickGO/GTerm?id=GO:0030182	[]
6	6	carboxylic acid biosynthetic process	GO:0046394	0.00495	0.0187	4.51	0.58	4.84136	-12.6834	PKM|4.9659;BGN|0.1995;PARK7|5.9704;BHMT|0.8166;APOA1|10.8643;APOA4|3.2211;GGT1|5.0582	7	430	185	38520	http://www.ebi.ac.uk/QuickGO/GTerm?id=GO:0046394	[]
5	5	organic acid biosynthetic process	GO:0016053	0.00495	0.0187	4.51	0.58	4.84136	-12.6834	PKM|4.9659;BGN|0.1995;PARK7|5.9704;BHMT|0.8166;APOA1|10.8643;APOA4|3.2211;GGT1|5.0582	7	430	185	38520	http://www.ebi.ac.uk/QuickGO/GTerm?id=GO:0016053	[]
6	5,6	positive regulation of lipid catabolic process	GO:0050996	0.00497	0.0187	1.54	0.29	4.84136	-12.6834	APOA1|10.8643;APOA4|3.2211	2	22	185	38520	http://www.ebi.ac.uk/QuickGO/GTerm?id=GO:0050996	[]
7	7	regulation of cholesterol metabolic process	GO:0090181	0.00497	0.0187	-0.46	0.09	4.84136	-12.6834	SOD1|5.7016;APOE|0.5105	2	22	185	38520	http://www.ebi.ac.uk/QuickGO/GTerm?id=GO:0090181	[]
6	6	microvillus assembly	GO:0030033	0.00497	0.0187	0.78	0.21	4.84136	-12.6834	RDX|1.5704;SLC9A3R1|3.8726	2	22	185	38520	http://www.ebi.ac.uk/QuickGO/GTerm?id=GO:0030033	[]
7	5,7	growth of symbiont in host	GO:0044117	0.00497	0.0187	-1.17	0.02	4.84136	-12.6834	PGLYRP1|0.1722;PGLYRP2|0.3945	2	22	185	38520	http://www.ebi.ac.uk/QuickGO/GTerm?id=GO:0044117	[]
5	5	cellular response to mechanical stimulus	GO:0071260	0.0051	0.0191	-3.47	-0.21	4.84136	-12.6834	CTSB|0.3105;AQP1|0.0133;MMP7|0.0817	3	72	185	38520	http://www.ebi.ac.uk/QuickGO/GTerm?id=GO:0071260	[]
9	7,9	mechanoreceptor differentiation	GO:0042490	0.0051	0.0191	0.26	0.16	4.84136	-12.6834	SLC9A3R1|3.8726;SOD1|5.7016;NAGLU|0.5546	3	72	185	38520	http://www.ebi.ac.uk/QuickGO/GTerm?id=GO:0042490	[]
4	4	sperm motility	GO:0030317	0.0051	0.0191	3.89	0.52	4.84136	-12.6834	SEMG1|41.6869;SORD|13.1826;ANXA5|14.0605	3	72	185	38520	http://www.ebi.ac.uk/QuickGO/GTerm?id=GO:0030317	[]
5	5	hemopoiesis	GO:0030097	0.00527	0.0198	8.12	0.93	4.84136	-12.6834	PGLYRP1|0.1722;LTF|26.7917;PGLYRP2|0.3945;ACE|8.2414;VCAM1|9.4624;PRG4|0.3631;SPINK5|0.1406;CA2|8.7096;SOD1|5.7016;GLO1|4.4463	10	794	185	38520	http://www.ebi.ac.uk/QuickGO/GTerm?id=GO:0030097	[]
8	5,6,7,8	negative regulation of ion transmembrane transport	GO:0034766	0.0053	0.0198	1.95	0.33	4.84136	-12.6834	SEMG1|41.6869;SLC9A3R1|3.8726;SPINK1|0.0113	3	73	185	38520	http://www.ebi.ac.uk/QuickGO/GTerm?id=GO:0034766	[]
6	6	nucleoside diphosphate metabolic process	GO:0009132	0.00531	0.0198	2.16	0.35	4.84136	-12.6834	PKM|4.9659;ALDOA|2.9923;PGK1|2.0324;TPI1|2.0893;GAPDH|2.2699	5	231	185	38520	http://www.ebi.ac.uk/QuickGO/GTerm?id=GO:0009132	[]
5	5	regulation of response to extracellular stimulus	GO:0032104	0.00531	0.0198	1.07	0.24	4.84136	-12.6834	MYLK|0.7516;MDH1|2.7542;PARK7|5.9704;ANXA5|14.0605;KRT6A|0.1127	5	231	185	38520	http://www.ebi.ac.uk/QuickGO/GTerm?id=GO:0032104	[]
6	6	regulation of response to nutrient levels	GO:0032107	0.00531	0.0198	1.07	0.24	4.84136	-12.6834	MYLK|0.7516;MDH1|2.7542;PARK7|5.9704;ANXA5|14.0605;KRT6A|0.1127	5	231	185	38520	http://www.ebi.ac.uk/QuickGO/GTerm?id=GO:0032107	[]
6	5,6	ion transport	GO:0006811	0.00532	0.0198	21.39	2.24	4.84136	-12.6834	SEMG1|41.6869;LASP1|0.0281;PDZK1|11.695;HBB|1.6749;MYLK|0.7516;LTF|26.7917;HBA1|1.5996;ACE|8.2414;AQP1|0.0133;AHNAK|0.0643;FOLR1|0.2188;LCN2|0.2208;PARK7|5.9704;EGF|0.7943;AOC1|2.0701;CD63|5.7016;SLC9A3R1|3.8726;CA2|8.7096;CA1|52.9663;SPINK1|0.0113;IL1RN|0.2729;APOE|0.5105;APOA1|10.8643;APOA4|3.2211;SLC3A2|0.4742	25	3017	185	38520	http://www.ebi.ac.uk/QuickGO/GTerm?id=GO:0006811	[]
5	4,5	regulation of transmembrane transport	GO:0034762	0.00533	0.0198	8.23	0.94	4.84136	-12.6834	SEMG1|41.6869;PDZK1|11.695;AHNAK|0.0643;PARK7|5.9704;EGF|0.7943;SLC9A3R1|3.8726;CA2|8.7096;SPINK1|0.0113	8	550	185	38520	http://www.ebi.ac.uk/QuickGO/GTerm?id=GO:0034762	[]
7	7	ribonucleoside monophosphate metabolic process	GO:0009161	0.00533	0.0198	3.31	0.46	4.84136	-12.6834	PKM|4.9659;ALDOA|2.9923;PGK1|2.0324;PARK7|5.9704;HSPA8|2.3988;TPI1|2.0893;GAPDH|2.2699	7	436	185	38520	http://www.ebi.ac.uk/QuickGO/GTerm?id=GO:0009161	[]
6	5,6	intracellular signal transduction	GO:0035556	0.00536	0.0199	-23.16	-2.14	4.84136	-12.6834	CD14|0.8241;GSN|0.0718;MYLK|0.7516;S100A9|0.0619;OLFM4|10.7647;LTF|26.7917;LCP1|3.5645;HSPB1|0.3837;CTSH|0.4699;SERPINB3|0.0377;KLK3|65.4636;PARK7|5.9704;YWHAZ|2.704;EGF|0.7943;TFF2|0.2655;CRYAB|0.2333;CDH1|0.8091;CDH13|0.1706;FN1|2.3988;SHISA5|0.2704;SLC9A3R1|3.8726;PRDX1|2.9107;CAT|22.4905;SPINK1|0.0113;SOD1|5.7016;IL1RN|0.2729;APOE|0.5105;APOA1|10.8643;S100A8|0.1644;C3|1.3804;A2M|22.9087	31	4012	185	38520	http://www.ebi.ac.uk/QuickGO/GTerm?id=GO:0035556	[]
5	5	vitamin metabolic process	GO:0006766	0.00538	0.02	-4.28	-0.28	4.84136	-12.6834	FOLR1|0.2188;CUBN|0.1067;ACPP|64.2688;LRP2|0.1459	4	145	185	38520	http://www.ebi.ac.uk/QuickGO/GTerm?id=GO:0006766	[]
6	6	regulation of cytoplasmic transport	GO:1903649	0.0054	0.02	2.81	0.41	4.84136	-12.6834	MSN|3.9084;RDX|1.5704;PARK7|5.9704;EGF|0.7943;CDH1|0.8091;SLC9A3R1|3.8726;PRDX1|2.9107	7	437	185	38520	http://www.ebi.ac.uk/QuickGO/GTerm?id=GO:1903649	[]
7	7	glomerular filtration	GO:0003094	0.00543	0.02	1.58	0.29	4.84136	-12.6834	AQP1|0.0133;IGHA2|1.977	2	23	185	38520	http://www.ebi.ac.uk/QuickGO/GTerm?id=GO:0003094	[]
8	6,8	regulation of membrane protein ectodomain proteolysis	GO:0051043	0.00543	0.02	-0.97	0.04	4.84136	-12.6834	TIMP1|18.197;APOE|0.5105	2	23	185	38520	http://www.ebi.ac.uk/QuickGO/GTerm?id=GO:0051043	[]
8	5,6,7,8	positive regulation of blood coagulation	GO:0030194	0.00543	0.02	-1.62	-0.02	4.84136	-12.6834	S100A9|0.0619;PLG|0.3908	2	23	185	38520	http://www.ebi.ac.uk/QuickGO/GTerm?id=GO:0030194	[]
6	4,6	growth of symbiont involved in interaction with host	GO:0044116	0.00543	0.02	-1.17	0.02	4.84136	-12.6834	PGLYRP1|0.1722;PGLYRP2|0.3945	2	23	185	38520	http://www.ebi.ac.uk/QuickGO/GTerm?id=GO:0044116	[]
4	4	positive regulation of hemostasis	GO:1900048	0.00543	0.02	-1.62	-0.02	4.84136	-12.6834	S100A9|0.0619;PLG|0.3908	2	23	185	38520	http://www.ebi.ac.uk/QuickGO/GTerm?id=GO:1900048	[]
5	3,5	growth involved in symbiotic interaction	GO:0044110	0.00543	0.02	-1.17	0.02	4.84136	-12.6834	PGLYRP1|0.1722;PGLYRP2|0.3945	2	23	185	38520	http://www.ebi.ac.uk/QuickGO/GTerm?id=GO:0044110	[]
8	6,8	negative regulation of steroid biosynthetic process	GO:0010894	0.00543	0.02	-0.46	0.09	4.84136	-12.6834	SOD1|5.7016;APOE|0.5105	2	23	185	38520	http://www.ebi.ac.uk/QuickGO/GTerm?id=GO:0010894	[]
4	4	gland development	GO:0048732	0.00546	0.0201	3.86	0.51	4.84136	-12.6834	PKM|4.9659;MSN|3.9084;EGF|0.7943;CDH1|0.8091;SLC9A3R1|3.8726;SOD1|5.7016;APOA1|10.8643	7	438	185	38520	http://www.ebi.ac.uk/QuickGO/GTerm?id=GO:0048732	[]
4	4	response to osmotic stress	GO:0006970	0.0055	0.0202	-1.12	0.03	4.84136	-12.6834	MYLK|0.7516;AQP1|0.0133;SORD|13.1826	3	74	185	38520	http://www.ebi.ac.uk/QuickGO/GTerm?id=GO:0006970	[]
4	3,4	negative regulation of signaling	GO:0023057	0.00564	0.0207	-12.25	-1.07	4.84136	-12.6834	OLFM4|10.7647;LTF|26.7917;AHSG|0.1432;HSPB1|0.3837;SERPINB3|0.0377;PARK7|5.9704;EGF|0.7943;SLC9A3R1|3.8726;FBN1|0.1585;VASN|0.0982;SPINK1|0.0113;IL1RN|0.2729;APOE|0.5105;APOA1|10.8643	14	1344	185	38520	http://www.ebi.ac.uk/QuickGO/GTerm?id=GO:0023057	[]
5	5	isoprenoid metabolic process	GO:0006720	0.00564	0.0207	-0.42	0.09	4.84136	-12.6834	LRP2|0.1459;APOE|0.5105;APOA1|10.8643;APOA4|3.2211	4	147	185	38520	http://www.ebi.ac.uk/QuickGO/GTerm?id=GO:0006720	[]
6	5,6	cellular response to nutrient levels	GO:0031669	0.00568	0.0208	-0.02	0.13	4.84136	-12.6834	MYLK|0.7516;MDH1|2.7542;FOLR1|0.2188;PARK7|5.9704;DSC2|0.118;AOC1|2.0701;ANXA5|14.0605;KRT6A|0.1127	8	556	185	38520	http://www.ebi.ac.uk/QuickGO/GTerm?id=GO:0031669	[]
5	4,5	modification of morphology or physiology of other organism involved in symbiotic interaction	GO:0051817	0.00571	0.0209	-1.43	0	4.84136	-12.6834	LTF|26.7917;AQP1|0.0133;APOE|0.5105	3	75	185	38520	http://www.ebi.ac.uk/QuickGO/GTerm?id=GO:0051817	[]
5	5	response to axon injury	GO:0048678	0.00571	0.0209	0.76	0.21	4.84136	-12.6834	SPP1|0.1738;SOD1|5.7016;APOA1|10.8643	3	75	185	38520	http://www.ebi.ac.uk/QuickGO/GTerm?id=GO:0048678	[]
4	4	negative regulation of leukocyte activation	GO:0002695	0.00578	0.0211	-2.68	-0.13	4.84136	-12.6834	PGLYRP1|0.1722;PGLYRP2|0.3945;TFF2|0.2655;SCGB1A1|8.5507	4	148	185	38520	http://www.ebi.ac.uk/QuickGO/GTerm?id=GO:0002695	[]
7	5,6,7	neuron projection development	GO:0031175	0.0058	0.0212	-7.02	-0.55	4.84136	-12.6834	HSP90AA1|2.466;COL6A1|0.3162;HSPA8|2.3988;CDH1|0.8091;SPP1|0.1738;FN1|2.3988;APOE|0.5105;APOA1|10.8643;CDH11|0.3105;APOA4|3.2211;NEU1|0.597;KLK6|0.0112	12	1070	185	38520	http://www.ebi.ac.uk/QuickGO/GTerm?id=GO:0031175	[]
8	6,7,8	regulation of I-kappaB kinase/NF-kappaB signaling	GO:0043122	0.0058	0.0212	0.98	0.23	4.84136	-12.6834	OLFM4|10.7647;LTF|26.7917;HSPB1|0.3837;SHISA5|0.2704;PRDX1|2.9107	5	236	185	38520	http://www.ebi.ac.uk/QuickGO/GTerm?id=GO:0043122	[]
4	4	response to starvation	GO:0042594	0.00586	0.0213	-0.12	0.12	4.84136	-12.6834	MYLK|0.7516;MDH1|2.7542;PARK7|5.9704;DSC2|0.118;AOC1|2.0701;IL1RN|0.2729;ANXA5|14.0605;KRT6A|0.1127	8	559	185	38520	http://www.ebi.ac.uk/QuickGO/GTerm?id=GO:0042594	[]
6	6	nucleoside triphosphate metabolic process	GO:0009141	0.00587	0.0213	3.31	0.46	4.84136	-12.6834	PKM|4.9659;ALDOA|2.9923;PGK1|2.0324;PARK7|5.9704;HSPA8|2.3988;TPI1|2.0893;GAPDH|2.2699	7	444	185	38520	http://www.ebi.ac.uk/QuickGO/GTerm?id=GO:0009141	[]
7	5,7	detection of bacterium	GO:0016045	0.00591	0.0213	-1.17	0.02	4.84136	-12.6834	PGLYRP1|0.1722;PGLYRP2|0.3945	2	24	185	38520	http://www.ebi.ac.uk/QuickGO/GTerm?id=GO:0016045	[]
7	6,7	positive regulation of monooxygenase activity	GO:0032770	0.00591	0.0213	-0.48	0.09	4.84136	-12.6834	PARK7|5.9704;APOE|0.5105	2	24	185	38520	http://www.ebi.ac.uk/QuickGO/GTerm?id=GO:0032770	[]
6	6	glucocorticoid metabolic process	GO:0008211	0.00591	0.0213	-0.62	0.07	4.84136	-12.6834	SERPINA6|0.3873;APOA1|10.8643	2	24	185	38520	http://www.ebi.ac.uk/QuickGO/GTerm?id=GO:0008211	[]
8	7,8	auditory receptor cell development	GO:0060117	0.00591	0.0213	1.34	0.27	4.84136	-12.6834	SLC9A3R1|3.8726;SOD1|5.7016	2	24	185	38520	http://www.ebi.ac.uk/QuickGO/GTerm?id=GO:0060117	[]
6	6	renal filtration	GO:0097205	0.00591	0.0213	1.58	0.29	4.84136	-12.6834	AQP1|0.0133;IGHA2|1.977	2	24	185	38520	http://www.ebi.ac.uk/QuickGO/GTerm?id=GO:0097205	[]
7	7	fructose metabolic process	GO:0006000	0.00591	0.0213	1.6	0.29	4.84136	-12.6834	ALDOA|2.9923;SORD|13.1826	2	24	185	38520	http://www.ebi.ac.uk/QuickGO/GTerm?id=GO:0006000	[]
6	6	natural killer cell differentiation	GO:0001779	0.00591	0.0213	-1.17	0.02	4.84136	-12.6834	PGLYRP1|0.1722;PGLYRP2|0.3945	2	24	185	38520	http://www.ebi.ac.uk/QuickGO/GTerm?id=GO:0001779	[]
11	6,7,8,9,11	positive regulation of cysteine-type endopeptidase activity involved in apoptotic signaling pathway	GO:2001269	0.00591	0.0213	-1.23	0.01	4.84136	-12.6834	CD14|0.8241;GSN|0.0718	2	24	185	38520	http://www.ebi.ac.uk/QuickGO/GTerm?id=GO:2001269	[]
5	4,5	negative regulation of cell communication	GO:0010648	0.00593	0.0214	-12.25	-1.07	4.84136	-12.6834	OLFM4|10.7647;LTF|26.7917;AHSG|0.1432;HSPB1|0.3837;SERPINB3|0.0377;PARK7|5.9704;EGF|0.7943;SLC9A3R1|3.8726;FBN1|0.1585;VASN|0.0982;SPINK1|0.0113;IL1RN|0.2729;APOE|0.5105;APOA1|10.8643	14	1352	185	38520	http://www.ebi.ac.uk/QuickGO/GTerm?id=GO:0010648	[]
5	4,5	cellular component morphogenesis	GO:0032989	0.00598	0.0216	11.41	1.26	4.84136	-12.6834	HSP90AA1|2.466;ALDOA|2.9923;GSN|0.0718;MSN|3.9084;OLFM4|10.7647;COL6A1|0.3162;SERPINB3|0.0377;HSPA8|2.3988;SPP1|0.1738;FN1|2.3988;SLC9A3R1|3.8726;VASN|0.0982;SOD1|5.7016;APOE|0.5105;APOA1|10.8643;HEXB|1.3804;CDH11|0.3105	17	1792	185	38520	http://www.ebi.ac.uk/QuickGO/GTerm?id=GO:0032989	[]
7	7	nucleotide phosphorylation	GO:0046939	0.00601	0.0216	2.16	0.35	4.84136	-12.6834	PKM|4.9659;ALDOA|2.9923;PGK1|2.0324;TPI1|2.0893;GAPDH|2.2699	5	238	185	38520	http://www.ebi.ac.uk/QuickGO/GTerm?id=GO:0046939	[]
6	6	regulation of mitochondrion organization	GO:0010821	0.00604	0.0218	3.87	0.52	4.84136	-12.6834	MYLK|0.7516;MDH1|2.7542;PARK7|5.9704;YWHAZ|2.704;ANXA5|14.0605;KRT6A|0.1127	6	338	185	38520	http://www.ebi.ac.uk/QuickGO/GTerm?id=GO:0010821	[]
6	5,6	positive regulation of cell morphogenesis involved in differentiation	GO:0010770	0.00606	0.0218	3.87	0.52	4.84136	-12.6834	OLFM4|10.7647;SERPINB3|0.0377;FN1|2.3988;APOA1|10.8643	4	150	185	38520	http://www.ebi.ac.uk/QuickGO/GTerm?id=GO:0010770	[]
5	4,5	developmental cell growth	GO:0048588	0.00606	0.0218	-2.17	-0.08	4.84136	-12.6834	SPP1|0.1738;FN1|2.3988;APOE|0.5105;PI16|0.182	4	150	185	38520	http://www.ebi.ac.uk/QuickGO/GTerm?id=GO:0048588	[]
4	3,4	sexual reproduction	GO:0019953	0.00614	0.022	9.53	1.07	4.84136	-12.6834	SEMG1|41.6869;CTSB|0.3105;ACE|8.2414;SERPINA5|0.0698;PARK7|5.9704;SPINK1|0.0113;SOD1|5.7016;IGSF8|0.0973;HEXB|1.3804;GGT1|5.0582	10	812	185	38520	http://www.ebi.ac.uk/QuickGO/GTerm?id=GO:0019953	[]
6	5,6	regulation of extent of cell growth	GO:0061387	0.00614	0.022	-0.38	0.1	4.84136	-12.6834	SPP1|0.1738;FN1|2.3988;APOE|0.5105	3	77	185	38520	http://www.ebi.ac.uk/QuickGO/GTerm?id=GO:0061387	[]
5	5	cellular carbohydrate catabolic process	GO:0044275	0.00614	0.022	0.22	0.16	4.84136	-12.6834	GAA|0.6026;MGAM|3.5318;SORD|13.1826	3	77	185	38520	http://www.ebi.ac.uk/QuickGO/GTerm?id=GO:0044275	[]
5	5	sulfur amino acid metabolic process	GO:0000096	0.00614	0.022	0.09	0.14	4.84136	-12.6834	CNDP2|2.6303;BHMT|0.8166;GGT1|5.0582	3	77	185	38520	http://www.ebi.ac.uk/QuickGO/GTerm?id=GO:0000096	[]
10	6,9,10	positive regulation of NF-kappaB transcription factor activity	GO:0051092	0.0062	0.0221	-0.79	0.06	4.84136	-12.6834	S100A9|0.0619;LTF|26.7917;CAT|22.4905;S100A8|0.1644	4	151	185	38520	http://www.ebi.ac.uk/QuickGO/GTerm?id=GO:0051092	[]
5	4,5	lymphocyte activation involved in immune response	GO:0002285	0.0062	0.0221	0.2	0.16	4.84136	-12.6834	PGLYRP1|0.1722;LCP1|3.5645;PGLYRP2|0.3945;LAMP1|2.6062	4	151	185	38520	http://www.ebi.ac.uk/QuickGO/GTerm?id=GO:0002285	[]
6	6	regulation of lymphocyte differentiation	GO:0045619	0.0062	0.0221	-2.78	-0.14	4.84136	-12.6834	PGLYRP1|0.1722;PGLYRP2|0.3945;SPINK5|0.1406;SOD1|5.7016	4	151	185	38520	http://www.ebi.ac.uk/QuickGO/GTerm?id=GO:0045619	[]
7	7	peptidyl-amino acid modification	GO:0018193	0.00628	0.0224	-14.23	-1.26	4.84136	-12.6834	S100A9|0.0619;PPIC|9.6383;VTN|0.0809;BRD1|0.0125;ACE|8.2414;BGN|0.1995;PROZ|4.1305;PARK7|5.9704;EGF|0.7943;CTSA|0.4571;GAPDH|2.2699;GLB1|0.52;SPINK1|0.0113;APOA1|10.8643;S100A8|0.1644;MAN1A1|0.1096;NEU1|0.597	17	1801	185	38520	http://www.ebi.ac.uk/QuickGO/GTerm?id=GO:0018193	[]
6	4,6	positive regulation of intracellular transport	GO:0032388	0.0063	0.0224	2.48	0.38	4.84136	-12.6834	PDZK1|11.695;MSN|3.9084;RDX|1.5704;YWHAZ|2.704;EGF|0.7943;CDH1|0.8091	6	341	185	38520	http://www.ebi.ac.uk/QuickGO/GTerm?id=GO:0032388	[]
5	5	cellular amine metabolic process	GO:0044106	0.00633	0.0225	1.62	0.29	4.84136	-12.6834	FABP5|0.0296;PARK7|5.9704;BHMT|0.8166;APOA1|10.8643;APOA4|3.2211	5	241	185	38520	http://www.ebi.ac.uk/QuickGO/GTerm?id=GO:0044106	[]
4	4	myeloid leukocyte migration	GO:0097529	0.00634	0.0225	-3.78	-0.24	4.84136	-12.6834	S100A9|0.0619;OLFM4|10.7647;SPP1|0.1738;S100A8|0.1644	4	152	185	38520	http://www.ebi.ac.uk/QuickGO/GTerm?id=GO:0097529	[]
7	6,7	viral entry into host cell	GO:0046718	0.00637	0.0226	-0.37	0.1	4.84136	-12.6834	GSN|0.0718;DPP4|2.3335;SERPINB3|0.0377	3	78	185	38520	http://www.ebi.ac.uk/QuickGO/GTerm?id=GO:0046718	[]
7	4,6,7	positive regulation of secretion	GO:0051047	0.00639	0.0226	-4.68	-0.33	4.84136	-12.6834	CD14|0.8241;PDCD6IP|2.0701;S100A9|0.0619;AQP1|0.0133;LAMP1|2.6062;S100A8|0.1644	6	342	185	38520	http://www.ebi.ac.uk/QuickGO/GTerm?id=GO:0051047	[]
10	7,8,9,10	regulation of catenin import into nucleus	GO:0035412	0.0064	0.0226	-0.49	0.09	4.84136	-12.6834	EGF|0.7943;SLC9A3R1|3.8726	2	25	185	38520	http://www.ebi.ac.uk/QuickGO/GTerm?id=GO:0035412	[]
4	4	positive regulation of tissue remodeling	GO:0034105	0.0064	0.0226	-0.18	0.12	4.84136	-12.6834	SPP1|0.1738;CA2|8.7096	2	25	185	38520	http://www.ebi.ac.uk/QuickGO/GTerm?id=GO:0034105	[]
7	5,7	negative regulation of steroid metabolic process	GO:0045939	0.0064	0.0226	-0.46	0.09	4.84136	-12.6834	SOD1|5.7016;APOE|0.5105	2	25	185	38520	http://www.ebi.ac.uk/QuickGO/GTerm?id=GO:0045939	[]
6	4,6	detection of other organism	GO:0098543	0.0064	0.0226	-1.17	0.02	4.84136	-12.6834	PGLYRP1|0.1722;PGLYRP2|0.3945	2	25	185	38520	http://www.ebi.ac.uk/QuickGO/GTerm?id=GO:0098543	[]
8	7,8	glycosphingolipid catabolic process	GO:0046479	0.0064	0.0226	0.08	0.14	4.84136	-12.6834	HEXB|1.3804;NEU1|0.597	2	25	185	38520	http://www.ebi.ac.uk/QuickGO/GTerm?id=GO:0046479	[]
4	4	positive regulation of coagulation	GO:0050820	0.0064	0.0226	-1.62	-0.02	4.84136	-12.6834	S100A9|0.0619;PLG|0.3908	2	25	185	38520	http://www.ebi.ac.uk/QuickGO/GTerm?id=GO:0050820	[]
7	5,6,7	protein import	GO:0017038	0.00648	0.0228	-0.96	0.04	4.84136	-12.6834	HSP90AA1|2.466;EGF|0.7943;CDH1|0.8091;SLC9A3R1|3.8726;PRDX1|2.9107;APOE|0.5105	6	343	185	38520	http://www.ebi.ac.uk/QuickGO/GTerm?id=GO:0017038	[]
6	6	transforming growth factor beta receptor signaling pathway	GO:0007179	0.00655	0.023	-3.6	-0.22	4.84136	-12.6834	LRG1|0.8017;FOLR1|0.2188;FBN1|0.1585;VASN|0.0982;APOA1|10.8643	5	243	185	38520	http://www.ebi.ac.uk/QuickGO/GTerm?id=GO:0007179	[]
5	5	negative regulation of leukocyte differentiation	GO:1902106	0.0066	0.0232	-1.43	0	4.84136	-12.6834	PGLYRP1|0.1722;LTF|26.7917;PGLYRP2|0.3945	3	79	185	38520	http://www.ebi.ac.uk/QuickGO/GTerm?id=GO:1902106	[]
5	5	natural killer cell activation	GO:0030101	0.0066	0.0232	-0.42	0.09	4.84136	-12.6834	PGLYRP1|0.1722;PGLYRP2|0.3945;LAMP1|2.6062	3	79	185	38520	http://www.ebi.ac.uk/QuickGO/GTerm?id=GO:0030101	[]
8	8	cholesterol homeostasis	GO:0042632	0.0066	0.0232	0.29	0.16	4.84136	-12.6834	APOE|0.5105;APOA1|10.8643;APOA4|3.2211	3	79	185	38520	http://www.ebi.ac.uk/QuickGO/GTerm?id=GO:0042632	[]
4	4	protein localization	GO:0008104	0.00665	0.0233	14.52	1.56	4.84136	-12.6834	PDZK1|11.695;CD14|0.8241;HSP90AA1|2.466;GSN|0.0718;PDCD6IP|2.0701;MSN|3.9084;LCP1|3.5645;RDX|1.5704;PARK7|5.9704;YWHAZ|2.704;CUBN|0.1067;LMAN2|0.2466;EGF|0.7943;CTSA|0.4571;CDH1|0.8091;FN1|2.3988;CD63|5.7016;SLC9A3R1|3.8726;PRDX1|2.9107;FBN1|0.1585;PTPRN|0.7047;LAMP1|2.6062;IL1RN|0.2729;APOE|0.5105;APOA1|10.8643;AZGP1|1.2246;CPE|21.0863	27	3401	185	38520	http://www.ebi.ac.uk/QuickGO/GTerm?id=GO:0008104	[]
4	4	response to temperature stimulus	GO:0009266	0.00666	0.0233	1.43	0.28	4.84136	-12.6834	CD14|0.8241;HSP90AA1|2.466;HSPA8|2.3988;CRNN|0.0453;SOD1|5.7016	5	244	185	38520	http://www.ebi.ac.uk/QuickGO/GTerm?id=GO:0009266	[]
5	5	sulfur compound biosynthetic process	GO:0044272	0.00677	0.0237	-1.12	0.02	4.84136	-12.6834	LUM|0.2421;CNDP2|2.6303;BGN|0.1995;BHMT|0.8166;GGT1|5.0582	5	245	185	38520	http://www.ebi.ac.uk/QuickGO/GTerm?id=GO:0044272	[]
7	7	sterol homeostasis	GO:0055092	0.00683	0.0239	0.29	0.16	4.84136	-12.6834	APOE|0.5105;APOA1|10.8643;APOA4|3.2211	3	80	185	38520	http://www.ebi.ac.uk/QuickGO/GTerm?id=GO:0055092	[]
9	6,8,9	epiboly involved in wound healing	GO:0090505	0.00691	0.0241	0.59	0.19	4.84136	-12.6834	GSN|0.0718;LCP1|3.5645	2	26	185	38520	http://www.ebi.ac.uk/QuickGO/GTerm?id=GO:0090505	[]
5	5	inner ear receptor stereocilium organization	GO:0060122	0.00691	0.0241	1.34	0.27	4.84136	-12.6834	SLC9A3R1|3.8726;SOD1|5.7016	2	26	185	38520	http://www.ebi.ac.uk/QuickGO/GTerm?id=GO:0060122	[]
5	5	wound healing, spreading of cells	GO:0044319	0.00691	0.0241	0.59	0.19	4.84136	-12.6834	GSN|0.0718;LCP1|3.5645	2	26	185	38520	http://www.ebi.ac.uk/QuickGO/GTerm?id=GO:0044319	[]
6	6	response to lithium ion	GO:0010226	0.00691	0.0241	-1.25	0.01	4.84136	-12.6834	CDH1|0.8091;IGFBP2|0.0698	2	26	185	38520	http://www.ebi.ac.uk/QuickGO/GTerm?id=GO:0010226	[]
7	6,7	glycolipid catabolic process	GO:0019377	0.00691	0.0241	0.08	0.14	4.84136	-12.6834	HEXB|1.3804;NEU1|0.597	2	26	185	38520	http://www.ebi.ac.uk/QuickGO/GTerm?id=GO:0019377	[]
2	2	reproduction	GO:0000003	0.00692	0.0241	1.56	0.29	4.84136	-12.6834	SEMG1|41.6869;CTSB|0.3105;ACE|8.2414;SERPINA5|0.0698;PARK7|5.9704;SPP1|0.1738;SPINK1|0.0113;SOD1|5.7016;IGSF8|0.0973;MMP7|0.0817;HEXB|1.3804;GGT1|5.0582	12	1095	185	38520	http://www.ebi.ac.uk/QuickGO/GTerm?id=GO:0000003	[]
8	6,7,8	regulation of anion transport	GO:0044070	0.00694	0.0241	-1.15	0.02	4.84136	-12.6834	PDZK1|11.695;CA2|8.7096;IL1RN|0.2729;APOE|0.5105	4	156	185	38520	http://www.ebi.ac.uk/QuickGO/GTerm?id=GO:0044070	[]
8	5,8	protein N-linked glycosylation	GO:0006487	0.00694	0.0241	-1.81	-0.04	4.84136	-12.6834	CTSA|0.4571;GLB1|0.52;MAN1A1|0.1096;NEU1|0.597	4	156	185	38520	http://www.ebi.ac.uk/QuickGO/GTerm?id=GO:0006487	[]
6	6	nucleoside monophosphate metabolic process	GO:0009123	0.00699	0.0242	3.31	0.46	4.84136	-12.6834	PKM|4.9659;ALDOA|2.9923;PGK1|2.0324;PARK7|5.9704;HSPA8|2.3988;TPI1|2.0893;GAPDH|2.2699	7	459	185	38520	http://www.ebi.ac.uk/QuickGO/GTerm?id=GO:0009123	[]
6	6	lytic vacuole organization	GO:0080171	0.00707	0.0244	-0.14	0.12	4.84136	-12.6834	GAA|0.6026;HEXB|1.3804;NAGLU|0.5546	3	81	185	38520	http://www.ebi.ac.uk/QuickGO/GTerm?id=GO:0080171	[]
4	4	negative regulation of transmembrane transport	GO:0034763	0.00707	0.0244	1.95	0.33	4.84136	-12.6834	SEMG1|41.6869;SLC9A3R1|3.8726;SPINK1|0.0113	3	81	185	38520	http://www.ebi.ac.uk/QuickGO/GTerm?id=GO:0034763	[]
7	7	lysosome organization	GO:0007040	0.00707	0.0244	-0.14	0.12	4.84136	-12.6834	GAA|0.6026;HEXB|1.3804;NAGLU|0.5546	3	81	185	38520	http://www.ebi.ac.uk/QuickGO/GTerm?id=GO:0007040	[]
5	5	endoderm development	GO:0007492	0.00707	0.0244	-0.38	0.1	4.84136	-12.6834	VTN|0.0809;COL6A1|0.3162;FN1|2.3988	3	81	185	38520	http://www.ebi.ac.uk/QuickGO/GTerm?id=GO:0007492	[]
4	4	interaction with host	GO:0051701	0.00709	0.0245	0.77	0.21	4.84136	-12.6834	GSN|0.0718;DPP4|2.3335;LTF|26.7917;SERPINB3|0.0377	4	157	185	38520	http://www.ebi.ac.uk/QuickGO/GTerm?id=GO:0051701	[]
6	6	response to UV	GO:0009411	0.00725	0.025	0.65	0.2	4.84136	-12.6834	MME|2.2284;SERPINB13|0.3373;AQP1|0.0133;CAT|22.4905	4	158	185	38520	http://www.ebi.ac.uk/QuickGO/GTerm?id=GO:0009411	[]
4	4	macromolecular complex subunit organization	GO:0043933	0.0073	0.0251	19.36	2.04	4.84136	-12.6834	VWF|1.3804;SEMG1|41.6869;HBB|1.6749;HSP90AA1|2.466;ALDOA|2.9923;GSN|0.0718;LUM|0.2421;PDCD6IP|2.0701;MYLK|0.7516;OLFM4|10.7647;LCP1|3.5645;COL6A1|0.3162;HBA1|1.5996;BRD1|0.0125;AHNAK|0.0643;RDX|1.5704;PARK7|5.9704;HSPA8|2.3988;EGF|0.7943;CRYAB|0.2333;FN1|2.3988;SLC9A3R1|3.8726;HLA-DRA|1.406;CAT|22.4905;APOE|0.5105;SH3BGRL3|0.0409;ANXA5|14.0605;APOA1|10.8643;APOA4|3.2211	29	3761	185	38520	http://www.ebi.ac.uk/QuickGO/GTerm?id=GO:0043933	[]
5	4,5	substrate adhesion-dependent cell spreading	GO:0034446	0.00731	0.0252	2.45	0.38	4.84136	-12.6834	OLFM4|10.7647;FN1|2.3988;APOA1|10.8643	3	82	185	38520	http://www.ebi.ac.uk/QuickGO/GTerm?id=GO:0034446	[]
4	4	hematopoietic or lymphoid organ development	GO:0048534	0.00735	0.0253	8.12	0.93	4.84136	-12.6834	PGLYRP1|0.1722;LTF|26.7917;PGLYRP2|0.3945;ACE|8.2414;VCAM1|9.4624;PRG4|0.3631;SPINK5|0.1406;CA2|8.7096;SOD1|5.7016;GLO1|4.4463	10	834	185	38520	http://www.ebi.ac.uk/QuickGO/GTerm?id=GO:0048534	[]
7	7	glucan catabolic process	GO:0009251	0.00744	0.0254	-0.33	0.1	4.84136	-12.6834	GAA|0.6026;MGAM|3.5318	2	27	185	38520	http://www.ebi.ac.uk/QuickGO/GTerm?id=GO:0009251	[]
5	5	microvillus organization	GO:0032528	0.00744	0.0254	0.78	0.21	4.84136	-12.6834	RDX|1.5704;SLC9A3R1|3.8726	2	27	185	38520	http://www.ebi.ac.uk/QuickGO/GTerm?id=GO:0032528	[]
9	6,7,8,9	catenin import into nucleus	GO:0035411	0.00744	0.0254	-0.49	0.09	4.84136	-12.6834	EGF|0.7943;SLC9A3R1|3.8726	2	27	185	38520	http://www.ebi.ac.uk/QuickGO/GTerm?id=GO:0035411	[]
4	4	glutathione derivative metabolic process	GO:1901685	0.00744	0.0254	1.12	0.25	4.84136	-12.6834	CNDP2|2.6303;GGT1|5.0582	2	27	185	38520	http://www.ebi.ac.uk/QuickGO/GTerm?id=GO:1901685	[]
8	7,8	ceramide catabolic process	GO:0046514	0.00744	0.0254	0.08	0.14	4.84136	-12.6834	HEXB|1.3804;NEU1|0.597	2	27	185	38520	http://www.ebi.ac.uk/QuickGO/GTerm?id=GO:0046514	[]
8	7,8	nitric oxide mediated signal transduction	GO:0007263	0.00744	0.0254	-2.24	-0.08	4.84136	-12.6834	SPINK1|0.0113;APOE|0.5105	2	27	185	38520	http://www.ebi.ac.uk/QuickGO/GTerm?id=GO:0007263	[]
5	5	glutathione derivative biosynthetic process	GO:1901687	0.00744	0.0254	1.12	0.25	4.84136	-12.6834	CNDP2|2.6303;GGT1|5.0582	2	27	185	38520	http://www.ebi.ac.uk/QuickGO/GTerm?id=GO:1901687	[]
8	7,8	epiboly	GO:0090504	0.00744	0.0254	0.59	0.19	4.84136	-12.6834	GSN|0.0718;LCP1|3.5645	2	27	185	38520	http://www.ebi.ac.uk/QuickGO/GTerm?id=GO:0090504	[]
4	4	negative regulation of lipid transport	GO:0032369	0.00744	0.0254	-0.39	0.1	4.84136	-12.6834	EGF|0.7943;APOE|0.5105	2	27	185	38520	http://www.ebi.ac.uk/QuickGO/GTerm?id=GO:0032369	[]
6	6	cellular response to organic cyclic compound	GO:0071407	0.00748	0.0255	-1.66	-0.03	4.84136	-12.6834	MSN|3.9084;AQP1|0.0133;FOLR1|0.2188;AOC1|2.0701;CDH1|0.8091;SOD1|5.7016;IL1RN|0.2729	7	465	185	38520	http://www.ebi.ac.uk/QuickGO/GTerm?id=GO:0071407	[]
7	6,7	regulation of blood vessel size	GO:0050880	0.00757	0.0258	2.19	0.35	4.84136	-12.6834	HBB|1.6749;ACE|8.2414;SOD1|5.7016;APOE|0.5105	4	160	185	38520	http://www.ebi.ac.uk/QuickGO/GTerm?id=GO:0050880	[]
5	4,5	cellular response to extracellular stimulus	GO:0031668	0.00761	0.0259	-0.02	0.13	4.84136	-12.6834	MYLK|0.7516;MDH1|2.7542;FOLR1|0.2188;PARK7|5.9704;DSC2|0.118;AOC1|2.0701;ANXA5|14.0605;KRT6A|0.1127	8	585	185	38520	http://www.ebi.ac.uk/QuickGO/GTerm?id=GO:0031668	[]
6	5,6	positive regulation of innate immune response	GO:0045089	0.00771	0.0262	-3.6	-0.22	4.84136	-12.6834	CTSB|0.3105;CD14|0.8241;PGLYRP1|0.1722;LTF|26.7917;PGLYRP2|0.3945;LAMP1|2.6062	6	356	185	38520	http://www.ebi.ac.uk/QuickGO/GTerm?id=GO:0045089	[]
5	5	regulation of tube size	GO:0035150	0.00774	0.0263	2.19	0.35	4.84136	-12.6834	HBB|1.6749;ACE|8.2414;SOD1|5.7016;APOE|0.5105	4	161	185	38520	http://www.ebi.ac.uk/QuickGO/GTerm?id=GO:0035150	[]
3	3	movement in environment of other organism involved in symbiotic interaction	GO:0052192	0.00781	0.0264	-0.37	0.1	4.84136	-12.6834	GSN|0.0718;DPP4|2.3335;SERPINB3|0.0377	3	84	185	38520	http://www.ebi.ac.uk/QuickGO/GTerm?id=GO:0052192	[]
6	5,6	entry into host	GO:0044409	0.00781	0.0264	-0.37	0.1	4.84136	-12.6834	GSN|0.0718;DPP4|2.3335;SERPINB3|0.0377	3	84	185	38520	http://www.ebi.ac.uk/QuickGO/GTerm?id=GO:0044409	[]
6	6	entry into host cell	GO:0030260	0.00781	0.0264	-0.37	0.1	4.84136	-12.6834	GSN|0.0718;DPP4|2.3335;SERPINB3|0.0377	3	84	185	38520	http://www.ebi.ac.uk/QuickGO/GTerm?id=GO:0030260	[]
5	4,5	movement in host environment	GO:0052126	0.00781	0.0264	-0.37	0.1	4.84136	-12.6834	GSN|0.0718;DPP4|2.3335;SERPINB3|0.0377	3	84	185	38520	http://www.ebi.ac.uk/QuickGO/GTerm?id=GO:0052126	[]
4	4	entry into other organism involved in symbiotic interaction	GO:0051828	0.00781	0.0264	-0.37	0.1	4.84136	-12.6834	GSN|0.0718;DPP4|2.3335;SERPINB3|0.0377	3	84	185	38520	http://www.ebi.ac.uk/QuickGO/GTerm?id=GO:0051828	[]
5	5	entry into cell of other organism involved in symbiotic interaction	GO:0051806	0.00781	0.0264	-0.37	0.1	4.84136	-12.6834	GSN|0.0718;DPP4|2.3335;SERPINB3|0.0377	3	84	185	38520	http://www.ebi.ac.uk/QuickGO/GTerm?id=GO:0051806	[]
5	5	protein catabolic process	GO:0030163	0.0079	0.0266	-0.57	0.08	4.84136	-12.6834	UBA1|0.0107;CTSB|0.3105;PDCD6IP|2.0701;MSN|3.9084;CTSC|0.3076;ACE|8.2414;CTSH|0.4699;RDX|1.5704;PARK7|5.9704;PGA3|0.2208;EGF|0.7943;TIMP1|18.197;APOE|0.5105;PGC|7.5858	14	1399	185	38520	http://www.ebi.ac.uk/QuickGO/GTerm?id=GO:0030163	[]
9	6,7,8,9	regulation of MAPK cascade	GO:0043408	0.00795	0.0268	0.63	0.2	4.84136	-12.6834	SERPINB3|0.0377;EGF|0.7943;TFF2|0.2655;FN1|2.3988;SLC9A3R1|3.8726;PRDX1|2.9107;SOD1|5.7016;IL1RN|0.2729;APOE|0.5105;C3|1.3804	10	844	185	38520	http://www.ebi.ac.uk/QuickGO/GTerm?id=GO:0043408	[]
7	6,7	phosphatidylcholine biosynthetic process	GO:0006656	0.00799	0.0268	0.49	0.18	4.84136	-12.6834	FABP5|0.0296;APOA1|10.8643	2	28	185	38520	http://www.ebi.ac.uk/QuickGO/GTerm?id=GO:0006656	[]
7	5,6,7	positive regulation of substrate adhesion-dependent cell spreading	GO:1900026	0.00799	0.0268	2.07	0.34	4.84136	-12.6834	OLFM4|10.7647;APOA1|10.8643	2	28	185	38520	http://www.ebi.ac.uk/QuickGO/GTerm?id=GO:1900026	[]
7	7	regulation of systemic arterial blood pressure by renin-angiotensin	GO:0003081	0.00799	0.0268	1.26	0.26	4.84136	-12.6834	MME|2.2284;ACE|8.2414	2	28	185	38520	http://www.ebi.ac.uk/QuickGO/GTerm?id=GO:0003081	[]
6	6	neutrophil chemotaxis	GO:0030593	0.00807	0.0271	-2.75	-0.14	4.84136	-12.6834	S100A9|0.0619;SPP1|0.1738;S100A8|0.1644	3	85	185	38520	http://www.ebi.ac.uk/QuickGO/GTerm?id=GO:0030593	[]
7	5,6,7	negative regulation of intracellular signal transduction	GO:1902532	0.00809	0.0271	-2.4	-0.1	4.84136	-12.6834	OLFM4|10.7647;HSPB1|0.3837;SERPINB3|0.0377;PARK7|5.9704;SLC9A3R1|3.8726;SPINK1|0.0113;APOE|0.5105	7	472	185	38520	http://www.ebi.ac.uk/QuickGO/GTerm?id=GO:1902532	[]
7	6,7	carboxylic acid transport	GO:0046942	0.00809	0.0271	-2.57	-0.12	4.84136	-12.6834	PDZK1|11.695;ACE|8.2414;FOLR1|0.2188;SLC9A3R1|3.8726;IL1RN|0.2729;APOE|0.5105;SLC3A2|0.4742	7	472	185	38520	http://www.ebi.ac.uk/QuickGO/GTerm?id=GO:0046942	[]
4	4	actin filament-based process	GO:0030029	0.00814	0.0273	-10.03	-0.85	4.84136	-12.6834	ALDOA|2.9923;GSN|0.0718;MYLK|0.7516;S100A9|0.0619;LCP1|3.5645;AQP1|0.0133;RDX|1.5704;DSC2|0.118;SLC9A3R1|3.8726;TPM4|0.3076;SH3BGRL3|0.0409;APOA1|10.8643	12	1119	185	38520	http://www.ebi.ac.uk/QuickGO/GTerm?id=GO:0030029	[]
9	6,7,8,9	regulation of protein import into nucleus	GO:0042306	0.00825	0.0276	-0.86	0.05	4.84136	-12.6834	EGF|0.7943;CDH1|0.8091;SLC9A3R1|3.8726;PRDX1|2.9107	4	164	185	38520	http://www.ebi.ac.uk/QuickGO/GTerm?id=GO:0042306	[]
4	4	regulation of cell differentiation	GO:0045595	0.00833	0.0278	-13.99	-1.24	4.84136	-12.6834	OLFM4|10.7647;PGLYRP1|0.1722;LTF|26.7917;PGLYRP2|0.3945;SERPINB3|0.0377;SPINK5|0.1406;SPP1|0.1738;FN1|2.3988;CA2|8.7096;VASN|0.0982;SOD1|5.7016;APOE|0.5105;APOA1|10.8643;PI16|0.182;NEU1|0.597;KLK6|0.0112	16	1704	185	38520	http://www.ebi.ac.uk/QuickGO/GTerm?id=GO:0045595	[]
8	8	protein depolymerization	GO:0051261	0.00842	0.0281	1.96	0.33	4.84136	-12.6834	GSN|0.0718;RDX|1.5704;HSPA8|2.3988;SH3BGRL3|0.0409	4	165	185	38520	http://www.ebi.ac.uk/QuickGO/GTerm?id=GO:0051261	[]
9	5,8,9	positive regulation of sequence-specific DNA binding transcription factor activity	GO:0051091	0.0085	0.0283	1.99	0.33	4.84136	-12.6834	S100A9|0.0619;LTF|26.7917;PARK7|5.9704;CAT|22.4905;S100A8|0.1644	5	259	185	38520	http://www.ebi.ac.uk/QuickGO/GTerm?id=GO:0051091	[]
6	5,6	organic acid transport	GO:0015849	0.00854	0.0283	-2.57	-0.12	4.84136	-12.6834	PDZK1|11.695;ACE|8.2414;FOLR1|0.2188;SLC9A3R1|3.8726;IL1RN|0.2729;APOE|0.5105;SLC3A2|0.4742	7	477	185	38520	http://www.ebi.ac.uk/QuickGO/GTerm?id=GO:0015849	[]
5	5	intestinal absorption	GO:0050892	0.00855	0.0283	1.54	0.29	4.84136	-12.6834	APOA1|10.8643;APOA4|3.2211	2	29	185	38520	http://www.ebi.ac.uk/QuickGO/GTerm?id=GO:0050892	[]
6	6	cellular polysaccharide catabolic process	GO:0044247	0.00855	0.0283	-0.33	0.1	4.84136	-12.6834	GAA|0.6026;MGAM|3.5318	2	29	185	38520	http://www.ebi.ac.uk/QuickGO/GTerm?id=GO:0044247	[]
7	7	protein refolding	GO:0042026	0.00855	0.0283	0.77	0.21	4.84136	-12.6834	HSP90AA1|2.466;HSPA8|2.3988	2	29	185	38520	http://www.ebi.ac.uk/QuickGO/GTerm?id=GO:0042026	[]
5	5	mucosal immune response	GO:0002385	0.00855	0.0283	1.94	0.33	4.84136	-12.6834	LTF|26.7917;APOA4|3.2211	2	29	185	38520	http://www.ebi.ac.uk/QuickGO/GTerm?id=GO:0002385	[]
5	5	cellular response to osmotic stress	GO:0071470	0.00855	0.0283	-2	-0.06	4.84136	-12.6834	MYLK|0.7516;AQP1|0.0133	2	29	185	38520	http://www.ebi.ac.uk/QuickGO/GTerm?id=GO:0071470	[]
6	6	regulation of response to reactive oxygen species	GO:1901031	0.00855	0.0283	2.31	0.36	4.84136	-12.6834	PARK7|5.9704;HP|34.3558	2	29	185	38520	http://www.ebi.ac.uk/QuickGO/GTerm?id=GO:1901031	[]
10	7,9,10	regulation of calcium ion transport	GO:0051924	0.00863	0.0286	-4.98	-0.35	4.84136	-12.6834	SEMG1|41.6869;MYLK|0.7516;AHNAK|0.0643;EGF|0.7943;SPINK1|0.0113	5	260	185	38520	http://www.ebi.ac.uk/QuickGO/GTerm?id=GO:0051924	[]
2	2	behavior	GO:0007610	0.00864	0.0286	-2.04	-0.07	4.84136	-12.6834	GAA|0.6026;DPP4|2.3335;HSPB1|0.3837;PARK7|5.9704;CDH13|0.1706;SOD1|5.7016;IL1RN|0.2729;HEXB|1.3804;NAGLU|0.5546	9	724	185	38520	http://www.ebi.ac.uk/QuickGO/GTerm?id=GO:0007610	[]
9	7,9	regulation of actin filament depolymerization	GO:0030834	0.00887	0.0291	-0.2	0.12	4.84136	-12.6834	GSN|0.0718;RDX|1.5704;SH3BGRL3|0.0409	3	88	185	38520	http://www.ebi.ac.uk/QuickGO/GTerm?id=GO:0030834	[]
5	4,5	regulation of macromolecule metabolic process	GO:0060255	0.00911	0.0291	-44.46	-4.24	4.84136	-12.6834	SEMG1|41.6869;CST6|0.0614;CD14|0.8241;MME|2.2284;CSTA|0.177;GSN|0.0718;LUM|0.2421;MSN|3.9084;SERPINC1|0.6026;S100A9|0.0619;VTN|0.0809;LTF|26.7917;SERPINB13|0.3373;AHSG|0.1432;CTSC|0.3076;ACE|8.2414;HSPB1|0.3837;CTSH|0.4699;AQP1|0.0133;PRG4|0.3631;AHNAK|0.0643;RDX|1.5704;SERPINB3|0.0377;SERPINA5|0.0698;PARK7|5.9704;A2ML1|0.2168;HSPA8|2.3988;SERPINA6|0.3873;SERPINA3|0.3436;EGF|0.7943;SPINK5|0.1406;…	61	9637	185	38520	http://www.ebi.ac.uk/QuickGO/GTerm?id=GO:0060255	[]
5	5	detection of external biotic stimulus	GO:0098581	0.00914	0.0291	-1.17	0.02	4.84136	-12.6834	PGLYRP1|0.1722;PGLYRP2|0.3945	2	30	185	38520	http://www.ebi.ac.uk/QuickGO/GTerm?id=GO:0098581	[]
7	6,7	glutathione biosynthetic process	GO:0006750	0.00914	0.0291	1.12	0.25	4.84136	-12.6834	CNDP2|2.6303;GGT1|5.0582	2	30	185	38520	http://www.ebi.ac.uk/QuickGO/GTerm?id=GO:0006750	[]
7	5,6,7	negative regulation of oxidative stress-induced cell death	GO:1903202	0.00914	0.0291	-0.36	0.1	4.84136	-12.6834	HSPB1|0.3837;PARK7|5.9704	2	30	185	38520	http://www.ebi.ac.uk/QuickGO/GTerm?id=GO:1903202	[]
5	5	amyloid precursor protein metabolic process	GO:0042982	0.00914	0.0291	-2.24	-0.09	4.84136	-12.6834	APOE|0.5105;KLK6|0.0112	2	30	185	38520	http://www.ebi.ac.uk/QuickGO/GTerm?id=GO:0042982	[]
6	5,6	regulation of interferon-gamma production	GO:0032649	0.00943	0.0291	-0.93	0.04	4.84136	-12.6834	PGLYRP1|0.1722;PGLYRP2|0.3945;SCGB1A1|8.5507	3	90	185	38520	http://www.ebi.ac.uk/QuickGO/GTerm?id=GO:0032649	[]
6	4,6	ethanolamine-containing compound metabolic process	GO:0042439	0.00943	0.0291	1.53	0.29	4.84136	-12.6834	FABP5|0.0296;APOA1|10.8643;APOA4|3.2211	3	90	185	38520	http://www.ebi.ac.uk/QuickGO/GTerm?id=GO:0042439	[]
6	6	steroid biosynthetic process	GO:0006694	0.00951	0.0291	2.59	0.39	4.84136	-12.6834	SOD1|5.7016;APOE|0.5105;APOA1|10.8643;APOA4|3.2211	4	171	185	38520	http://www.ebi.ac.uk/QuickGO/GTerm?id=GO:0006694	[]
7	7	post-translational protein modification	GO:0043687	0.00957	0.0291	-2.66	-0.13	4.84136	-12.6834	PROZ|4.1305;CTSA|0.4571;GLB1|0.52;ARSA|0.5754;MAN1A1|0.1096;NEU1|0.597	6	373	185	38520	http://www.ebi.ac.uk/QuickGO/GTerm?id=GO:0043687	[]
6	4,6	single-species biofilm formation in or on host organism	GO:0044407	0.00958	0.0291	0	0.14	4.84136	-12.6834	LTF|26.7917	1	2	185	38520	http://www.ebi.ac.uk/QuickGO/GTerm?id=GO:0044407	[]
10	5,8,9,10	positive regulation of dipeptide transport	GO:2000880	0.00958	0.0291	0	0.14	4.84136	-12.6834	CA2|8.7096	1	2	185	38520	http://www.ebi.ac.uk/QuickGO/GTerm?id=GO:2000880	[]
11	5,6,7,8,9,10,11	regulation of dipeptide transmembrane transport	GO:2001148	0.00958	0.0291	0	0.14	4.84136	-12.6834	CA2|8.7096	1	2	185	38520	http://www.ebi.ac.uk/QuickGO/GTerm?id=GO:2001148	[]
6	6	pharyngeal arch artery morphogenesis	GO:0061626	0.00958	0.0291	0	0.14	4.84136	-12.6834	FOLR1|0.2188	1	2	185	38520	http://www.ebi.ac.uk/QuickGO/GTerm?id=GO:0061626	[]
7	6,7	regulation of homocysteine metabolic process	GO:0050666	0.00958	0.0291	0	0.14	4.84136	-12.6834	BHMT|0.8166	1	2	185	38520	http://www.ebi.ac.uk/QuickGO/GTerm?id=GO:0050666	[]
9	7,8,9	type IIa hypersensitivity	GO:0001794	0.00958	0.0291	0	0.14	4.84136	-12.6834	C3|1.3804	1	2	185	38520	http://www.ebi.ac.uk/QuickGO/GTerm?id=GO:0001794	[]
5	5	glyoxylate cycle	GO:0006097	0.00958	0.0291	0	0.14	4.84136	-12.6834	IDH1|6.9183	1	2	185	38520	http://www.ebi.ac.uk/QuickGO/GTerm?id=GO:0006097	[]
7	5,6,7	carbon dioxide transmembrane transport	GO:0035378	0.00958	0.0291	0	0.14	4.84136	-12.6834	AQP1|0.0133	1	2	185	38520	http://www.ebi.ac.uk/QuickGO/GTerm?id=GO:0035378	[]
6	6	positive regulation of substrate-dependent cell migration, cell attachment to substrate	GO:1904237	0.00958	0.0291	0	0.14	4.84136	-12.6834	FN1|2.3988	1	2	185	38520	http://www.ebi.ac.uk/QuickGO/GTerm?id=GO:1904237	[]
10	7,8,9,10	positive regulation of peptidyl-cysteine S-nitrosylation	GO:2000170	0.00958	0.0291	0	0.14	4.84136	-12.6834	ACE|8.2414	1	2	185	38520	http://www.ebi.ac.uk/QuickGO/GTerm?id=GO:2000170	[]
7	7	peptide amidation	GO:0001519	0.00958	0.0291	0	0.14	4.84136	-12.6834	PGLYRP2|0.3945	1	2	185	38520	http://www.ebi.ac.uk/QuickGO/GTerm?id=GO:0001519	[]
5	4,5	regulation of single-species biofilm formation	GO:1900190	0.00958	0.0291	0	0.14	4.84136	-12.6834	LTF|26.7917	1	2	185	38520	http://www.ebi.ac.uk/QuickGO/GTerm?id=GO:1900190	[]
10	8,9,10	regulation of protein K48-linked deubiquitination	GO:1903093	0.00958	0.0291	0	0.14	4.84136	-12.6834	PARK7|5.9704	1	2	185	38520	http://www.ebi.ac.uk/QuickGO/GTerm?id=GO:1903093	[]
11	8,9,10,11	negative regulation of protein K48-linked deubiquitination	GO:1903094	0.00958	0.0291	0	0.14	4.84136	-12.6834	PARK7|5.9704	1	2	185	38520	http://www.ebi.ac.uk/QuickGO/GTerm?id=GO:1903094	[]
9	8,9	neuron intrinsic apoptotic signaling pathway in response to hydrogen peroxide	GO:0036482	0.00958	0.0291	0	0.14	4.84136	-12.6834	PARK7|5.9704	1	2	185	38520	http://www.ebi.ac.uk/QuickGO/GTerm?id=GO:0036482	[]
6	6	protein-carbohydrate complex assembly	GO:0065006	0.00958	0.0291	0	0.14	4.84136	-12.6834	HLA-DRA|1.406	1	2	185	38520	http://www.ebi.ac.uk/QuickGO/GTerm?id=GO:0065006	[]
9	7,8,9	regulation of phospholipid efflux	GO:1902994	0.00958	0.0291	0	0.14	4.84136	-12.6834	APOE|0.5105	1	2	185	38520	http://www.ebi.ac.uk/QuickGO/GTerm?id=GO:1902994	[]
10	7,8,9,10	negative regulation of sodium:proton antiporter activity	GO:0032416	0.00958	0.0291	0	0.14	4.84136	-12.6834	SLC9A3R1|3.8726	1	2	185	38520	http://www.ebi.ac.uk/QuickGO/GTerm?id=GO:0032416	[]
7	5,6,7	positive regulation of neurofibrillary tangle assembly	GO:1902998	0.00958	0.0291	0	0.14	4.84136	-12.6834	APOE|0.5105	1	2	185	38520	http://www.ebi.ac.uk/QuickGO/GTerm?id=GO:1902998	[]
7	6,7	sorbitol metabolic process	GO:0006060	0.00958	0.0291	0	0.14	4.84136	-12.6834	SORD|13.1826	1	2	185	38520	http://www.ebi.ac.uk/QuickGO/GTerm?id=GO:0006060	[]
11	8,9,10,11	regulation of TRAIL-activated apoptotic signaling pathway	GO:1903121	0.00958	0.0291	0	0.14	4.84136	-12.6834	PARK7|5.9704	1	2	185	38520	http://www.ebi.ac.uk/QuickGO/GTerm?id=GO:1903121	[]
8	5,6,8	chylomicron assembly	GO:0034378	0.00958	0.0291	0	0.14	4.84136	-12.6834	APOA4|3.2211	1	2	185	38520	http://www.ebi.ac.uk/QuickGO/GTerm?id=GO:0034378	[]
7	6,7	regulation of collateral sprouting of intact axon in response to injury	GO:0048683	0.00958	0.0291	0	0.14	4.84136	-12.6834	SPP1|0.1738	1	2	185	38520	http://www.ebi.ac.uk/QuickGO/GTerm?id=GO:0048683	[]
10	6,7,8,9,10	collateral sprouting of intact axon in response to injury	GO:0048673	0.00958	0.0291	0	0.14	4.84136	-12.6834	SPP1|0.1738	1	2	185	38520	http://www.ebi.ac.uk/QuickGO/GTerm?id=GO:0048673	[]
10	6,7,8,9,10	dipeptide transmembrane transport	GO:0035442	0.00958	0.0291	0	0.14	4.84136	-12.6834	CA2|8.7096	1	2	185	38520	http://www.ebi.ac.uk/QuickGO/GTerm?id=GO:0035442	[]
10	8,9,10	negative regulation of hydrogen peroxide-induced neuron intrinsic apoptotic signaling pathway	GO:1903384	0.00958	0.0291	0	0.14	4.84136	-12.6834	PARK7|5.9704	1	2	185	38520	http://www.ebi.ac.uk/QuickGO/GTerm?id=GO:1903384	[]
5	5	antigen processing and presentation of polysaccharide antigen via MHC class II	GO:0002505	0.00958	0.0291	0	0.14	4.84136	-12.6834	HLA-DRA|1.406	1	2	185	38520	http://www.ebi.ac.uk/QuickGO/GTerm?id=GO:0002505	[]
8	7,8	proximal convoluted tubule development	GO:0072019	0.00958	0.0291	0	0.14	4.84136	-12.6834	AQP1|0.0133	1	2	185	38520	http://www.ebi.ac.uk/QuickGO/GTerm?id=GO:0072019	[]
7	6,7	low-density lipoprotein particle mediated signaling	GO:0055096	0.00958	0.0291	0	0.14	4.84136	-12.6834	CDH13|0.1706	1	2	185	38520	http://www.ebi.ac.uk/QuickGO/GTerm?id=GO:0055096	[]
7	6,7	establishment or maintenance of actin cytoskeleton polarity	GO:0030950	0.00958	0.0291	0	0.14	4.84136	-12.6834	AQP1|0.0133	1	2	185	38520	http://www.ebi.ac.uk/QuickGO/GTerm?id=GO:0030950	[]
9	6,7,8,9	positive regulation of adenosine receptor signaling pathway	GO:0060168	0.00958	0.0291	0	0.14	4.84136	-12.6834	ACPP|64.2688	1	2	185	38520	http://www.ebi.ac.uk/QuickGO/GTerm?id=GO:0060168	[]
4	4	anagen	GO:0042640	0.00958	0.0291	0	0.14	4.84136	-12.6834	SPINK5|0.1406	1	2	185	38520	http://www.ebi.ac.uk/QuickGO/GTerm?id=GO:0042640	[]
8	6,8	regulation of cellular amino acid biosynthetic process	GO:2000282	0.00958	0.0291	0	0.14	4.84136	-12.6834	PARK7|5.9704	1	2	185	38520	http://www.ebi.ac.uk/QuickGO/GTerm?id=GO:2000282	[]
7	6,7	negative regulation of complement activation, lectin pathway	GO:0001869	0.00958	0.0291	0	0.14	4.84136	-12.6834	A2M|22.9087	1	2	185	38520	http://www.ebi.ac.uk/QuickGO/GTerm?id=GO:0001869	[]
7	7	clathrin coat disassembly	GO:0072318	0.00958	0.0291	0	0.14	4.84136	-12.6834	HSPA8|2.3988	1	2	185	38520	http://www.ebi.ac.uk/QuickGO/GTerm?id=GO:0072318	[]
6	6	peptide modification	GO:0031179	0.00958	0.0291	0	0.14	4.84136	-12.6834	PGLYRP2|0.3945	1	2	185	38520	http://www.ebi.ac.uk/QuickGO/GTerm?id=GO:0031179	[]
8	6,7,8	regulation of sulfur amino acid metabolic process	GO:0031335	0.00958	0.0291	0	0.14	4.84136	-12.6834	BHMT|0.8166	1	2	185	38520	http://www.ebi.ac.uk/QuickGO/GTerm?id=GO:0031335	[]
6	5,6	positive regulation of chondrocyte proliferation	GO:1902732	0.00958	0.0291	0	0.14	4.84136	-12.6834	LTF|26.7917	1	2	185	38520	http://www.ebi.ac.uk/QuickGO/GTerm?id=GO:1902732	[]
8	6,7,8	positive regulation of low-density lipoprotein particle receptor catabolic process	GO:0032805	0.00958	0.0291	0	0.14	4.84136	-12.6834	APOE|0.5105	1	2	185	38520	http://www.ebi.ac.uk/QuickGO/GTerm?id=GO:0032805	[]
7	7	enzyme active site formation	GO:0018307	0.00958	0.0291	0	0.14	4.84136	-12.6834	PARK7|5.9704	1	2	185	38520	http://www.ebi.ac.uk/QuickGO/GTerm?id=GO:0018307	[]
8	5,6,7,8	regulation of blood coagulation, intrinsic pathway	GO:2000266	0.00958	0.0291	0	0.14	4.84136	-12.6834	SERPINC1|0.6026	1	2	185	38520	http://www.ebi.ac.uk/QuickGO/GTerm?id=GO:2000266	[]
9	8,9	leucine import	GO:0060356	0.00958	0.0291	0	0.14	4.84136	-12.6834	SLC3A2|0.4742	1	2	185	38520	http://www.ebi.ac.uk/QuickGO/GTerm?id=GO:0060356	[]
6	5,6	regulation of natural killer cell degranulation	GO:0043321	0.00958	0.0291	0	0.14	4.84136	-12.6834	LAMP1|2.6062	1	2	185	38520	http://www.ebi.ac.uk/QuickGO/GTerm?id=GO:0043321	[]
5	5	single-species biofilm formation	GO:0044010	0.00958	0.0291	0	0.14	4.84136	-12.6834	LTF|26.7917	1	2	185	38520	http://www.ebi.ac.uk/QuickGO/GTerm?id=GO:0044010	[]
8	6,7,8	type II hypersensitivity	GO:0002445	0.00958	0.0291	0	0.14	4.84136	-12.6834	C3|1.3804	1	2	185	38520	http://www.ebi.ac.uk/QuickGO/GTerm?id=GO:0002445	[]
8	8	regulation of protein processing in phagocytic vesicle	GO:1903921	0.00958	0.0291	0	0.14	4.84136	-12.6834	GSN|0.0718	1	2	185	38520	http://www.ebi.ac.uk/QuickGO/GTerm?id=GO:1903921	[]
6	5,6	lipoprotein particle mediated signaling	GO:0055095	0.00958	0.0291	0	0.14	4.84136	-12.6834	CDH13|0.1706	1	2	185	38520	http://www.ebi.ac.uk/QuickGO/GTerm?id=GO:0055095	[]
9	8,9	positive regulation of type IIa hypersensitivity	GO:0001798	0.00958	0.0291	0	0.14	4.84136	-12.6834	C3|1.3804	1	2	185	38520	http://www.ebi.ac.uk/QuickGO/GTerm?id=GO:0001798	[]
7	6,7	iron chelate transport	GO:0015688	0.00958	0.0291	0	0.14	4.84136	-12.6834	LCN2|0.2208	1	2	185	38520	http://www.ebi.ac.uk/QuickGO/GTerm?id=GO:0015688	[]
6	5,6	positive regulation of superoxide dismutase activity	GO:1901671	0.00958	0.0291	0	0.14	4.84136	-12.6834	PARK7|5.9704	1	2	185	38520	http://www.ebi.ac.uk/QuickGO/GTerm?id=GO:1901671	[]
5	5	protein-carbohydrate complex subunit organization	GO:0071823	0.00958	0.0291	0	0.14	4.84136	-12.6834	HLA-DRA|1.406	1	2	185	38520	http://www.ebi.ac.uk/QuickGO/GTerm?id=GO:0071823	[]
7	6,7	positive regulation of activation of membrane attack complex	GO:0001970	0.00958	0.0291	0	0.14	4.84136	-12.6834	C3|1.3804	1	2	185	38520	http://www.ebi.ac.uk/QuickGO/GTerm?id=GO:0001970	[]
8	8	fructose biosynthetic process	GO:0046370	0.00958	0.0291	0	0.14	4.84136	-12.6834	SORD|13.1826	1	2	185	38520	http://www.ebi.ac.uk/QuickGO/GTerm?id=GO:0046370	[]
11	5,7,8,9,10,11	positive regulation of dipeptide transmembrane transport	GO:2001150	0.00958	0.0291	0	0.14	4.84136	-12.6834	CA2|8.7096	1	2	185	38520	http://www.ebi.ac.uk/QuickGO/GTerm?id=GO:2001150	[]
10	7,9,10	regulation of dipeptide transport	GO:0090089	0.00958	0.0291	0	0.14	4.84136	-12.6834	CA2|8.7096	1	2	185	38520	http://www.ebi.ac.uk/QuickGO/GTerm?id=GO:0090089	[]
4	4	biofilm formation	GO:0042710	0.00958	0.0291	0	0.14	4.84136	-12.6834	LTF|26.7917	1	2	185	38520	http://www.ebi.ac.uk/QuickGO/GTerm?id=GO:0042710	[]
8	5,7,8	siderophore transport	GO:0015891	0.00958	0.0291	0	0.14	4.84136	-12.6834	LCN2|0.2208	1	2	185	38520	http://www.ebi.ac.uk/QuickGO/GTerm?id=GO:0015891	[]
7	5,6,7	negative regulation of single-species biofilm formation in or on host organism	GO:1900229	0.00958	0.0291	0	0.14	4.84136	-12.6834	LTF|26.7917	1	2	185	38520	http://www.ebi.ac.uk/QuickGO/GTerm?id=GO:1900229	[]
12	6,7,8,9,10,11,12	positive regulation of mitochondrial electron transport, NADH to ubiquinone	GO:1902958	0.00958	0.0291	0	0.14	4.84136	-12.6834	PARK7|5.9704	1	2	185	38520	http://www.ebi.ac.uk/QuickGO/GTerm?id=GO:1902958	[]
8	7,8	positive regulation of type II hypersensitivity	GO:0002894	0.00958	0.0291	0	0.14	4.84136	-12.6834	C3|1.3804	1	2	185	38520	http://www.ebi.ac.uk/QuickGO/GTerm?id=GO:0002894	[]
7	6,7	regulation of establishment of T cell polarity	GO:1903903	0.00958	0.0291	0	0.14	4.84136	-12.6834	GSN|0.0718	1	2	185	38520	http://www.ebi.ac.uk/QuickGO/GTerm?id=GO:1903903	[]
10	6,8,9,10	positive regulation of phospholipid efflux	GO:1902995	0.00958	0.0291	0	0.14	4.84136	-12.6834	APOE|0.5105	1	2	185	38520	http://www.ebi.ac.uk/QuickGO/GTerm?id=GO:1902995	[]
6	5,6	regulation of single-species biofilm formation in or on host organism	GO:1900228	0.00958	0.0291	0	0.14	4.84136	-12.6834	LTF|26.7917	1	2	185	38520	http://www.ebi.ac.uk/QuickGO/GTerm?id=GO:1900228	[]
9	6,7,8,9	negative regulation of interleukin-1-mediated signaling pathway	GO:2000660	0.00958	0.0291	0	0.14	4.84136	-12.6834	IL1RN|0.2729	1	2	185	38520	http://www.ebi.ac.uk/QuickGO/GTerm?id=GO:2000660	[]
9	4,7,8,9	positive regulation of oligopeptide transport	GO:2000878	0.00958	0.0291	0	0.14	4.84136	-12.6834	CA2|8.7096	1	2	185	38520	http://www.ebi.ac.uk/QuickGO/GTerm?id=GO:2000878	[]
7	5,6,7	positive regulation of natural killer cell degranulation	GO:0043323	0.00958	0.0291	0	0.14	4.84136	-12.6834	LAMP1|2.6062	1	2	185	38520	http://www.ebi.ac.uk/QuickGO/GTerm?id=GO:0043323	[]
7	7	cellular response to insulin-like growth factor stimulus	GO:1990314	0.00958	0.0291	0	0.14	4.84136	-12.6834	FBN1|0.1585	1	2	185	38520	http://www.ebi.ac.uk/QuickGO/GTerm?id=GO:1990314	[]
6	6	polysaccharide assembly with MHC class II protein complex	GO:0002506	0.00958	0.0291	0	0.14	4.84136	-12.6834	HLA-DRA|1.406	1	2	185	38520	http://www.ebi.ac.uk/QuickGO/GTerm?id=GO:0002506	[]
6	6	cell migration involved in heart formation	GO:0060974	0.00958	0.0291	0	0.14	4.84136	-12.6834	FOLR1|0.2188	1	2	185	38520	http://www.ebi.ac.uk/QuickGO/GTerm?id=GO:0060974	[]
9	6,8,9	regulation of oligopeptide transport	GO:0090088	0.00958	0.0291	0	0.14	4.84136	-12.6834	CA2|8.7096	1	2	185	38520	http://www.ebi.ac.uk/QuickGO/GTerm?id=GO:0090088	[]
8	8	positive regulation of protein processing in phagocytic vesicle	GO:1903923	0.00958	0.0291	0	0.14	4.84136	-12.6834	GSN|0.0718	1	2	185	38520	http://www.ebi.ac.uk/QuickGO/GTerm?id=GO:1903923	[]
5	5	positive regulation of bone mineralization involved in bone maturation	GO:1900159	0.00958	0.0291	0	0.14	4.84136	-12.6834	LTF|26.7917	1	2	185	38520	http://www.ebi.ac.uk/QuickGO/GTerm?id=GO:1900159	[]
10	5,6,8,9,10	negative regulation of osteoclast development	GO:2001205	0.00958	0.0291	0	0.14	4.84136	-12.6834	LTF|26.7917	1	2	185	38520	http://www.ebi.ac.uk/QuickGO/GTerm?id=GO:2001205	[]
8	7,8	metanephric proximal convoluted tubule development	GO:0072229	0.00958	0.0291	0	0.14	4.84136	-12.6834	AQP1|0.0133	1	2	185	38520	http://www.ebi.ac.uk/QuickGO/GTerm?id=GO:0072229	[]
10	8,9,10	regulation of type IIa hypersensitivity	GO:0001796	0.00958	0.0291	0	0.14	4.84136	-12.6834	C3|1.3804	1	2	185	38520	http://www.ebi.ac.uk/QuickGO/GTerm?id=GO:0001796	[]
9	6,8,9	regulation of complement activation, lectin pathway	GO:0001868	0.00958	0.0291	0	0.14	4.84136	-12.6834	A2M|22.9087	1	2	185	38520	http://www.ebi.ac.uk/QuickGO/GTerm?id=GO:0001868	[]
6	6	regulation of substrate-dependent cell migration, cell attachment to substrate	GO:1904235	0.00958	0.0291	0	0.14	4.84136	-12.6834	FN1|2.3988	1	2	185	38520	http://www.ebi.ac.uk/QuickGO/GTerm?id=GO:1904235	[]
6	4,5,6	negative regulation of single-species biofilm formation	GO:1900191	0.00958	0.0291	0	0.14	4.84136	-12.6834	LTF|26.7917	1	2	185	38520	http://www.ebi.ac.uk/QuickGO/GTerm?id=GO:1900191	[]
10	5,9,10	NADPH regeneration	GO:0006740	0.00958	0.0291	0	0.14	4.84136	-12.6834	IDH1|6.9183	1	2	185	38520	http://www.ebi.ac.uk/QuickGO/GTerm?id=GO:0006740	[]
6	5,6	negative regulation of presynaptic membrane organization	GO:1901630	0.00958	0.0291	0	0.14	4.84136	-12.6834	APOE|0.5105	1	2	185	38520	http://www.ebi.ac.uk/QuickGO/GTerm?id=GO:1901630	[]
7	6,7	lipid transport across blood brain barrier	GO:1990379	0.00958	0.0291	0	0.14	4.84136	-12.6834	APOE|0.5105	1	2	185	38520	http://www.ebi.ac.uk/QuickGO/GTerm?id=GO:1990379	[]
6	6	neuropeptide catabolic process	GO:0010813	0.00958	0.0291	0	0.14	4.84136	-12.6834	CTSH|0.4699	1	2	185	38520	http://www.ebi.ac.uk/QuickGO/GTerm?id=GO:0010813	[]
8	7,8	negative regulation of ubiquitin-specific protease activity	GO:2000157	0.00958	0.0291	0	0.14	4.84136	-12.6834	PARK7|5.9704	1	2	185	38520	http://www.ebi.ac.uk/QuickGO/GTerm?id=GO:2000157	[]
7	7	protein processing in phagocytic vesicle	GO:1900756	0.00958	0.0291	0	0.14	4.84136	-12.6834	GSN|0.0718	1	2	185	38520	http://www.ebi.ac.uk/QuickGO/GTerm?id=GO:1900756	[]
6	6	dense core granule maturation	GO:1990502	0.00958	0.0291	0	0.14	4.84136	-12.6834	PTPRN|0.7047	1	2	185	38520	http://www.ebi.ac.uk/QuickGO/GTerm?id=GO:1990502	[]
6	5,6	negative regulation of hydrogen peroxide catabolic process	GO:2000296	0.00958	0.0291	0	0.14	4.84136	-12.6834	HP|34.3558	1	2	185	38520	http://www.ebi.ac.uk/QuickGO/GTerm?id=GO:2000296	[]
5	5	peptidyl-cysteine oxidation	GO:0018171	0.00958	0.0291	0	0.14	4.84136	-12.6834	PARK7|5.9704	1	2	185	38520	http://www.ebi.ac.uk/QuickGO/GTerm?id=GO:0018171	[]
9	8,9	regulation of hydrogen peroxide-induced neuron intrinsic apoptotic signaling pathway	GO:1903383	0.00958	0.0291	0	0.14	4.84136	-12.6834	PARK7|5.9704	1	2	185	38520	http://www.ebi.ac.uk/QuickGO/GTerm?id=GO:1903383	[]
9	7,8,9	regulation of type II hypersensitivity	GO:0002892	0.00958	0.0291	0	0.14	4.84136	-12.6834	C3|1.3804	1	2	185	38520	http://www.ebi.ac.uk/QuickGO/GTerm?id=GO:0002892	[]
4	4	regulation of primary metabolic process	GO:0080090	0.0096	0.0291	-44.17	-4.21	4.84136	-12.6834	SEMG1|41.6869;CST6|0.0614;CD14|0.8241;MME|2.2284;CSTA|0.177;GSN|0.0718;LUM|0.2421;MSN|3.9084;SERPINC1|0.6026;S100A9|0.0619;VTN|0.0809;LTF|26.7917;SERPINB13|0.3373;AHSG|0.1432;CTSC|0.3076;ACE|8.2414;HSPB1|0.3837;CTSH|0.4699;AQP1|0.0133;PRG4|0.3631;AHNAK|0.0643;RDX|1.5704;SERPINB3|0.0377;SERPINA5|0.0698;PARK7|5.9704;A2ML1|0.2168;HSPA8|2.3988;SERPINA6|0.3873;SERPINA3|0.3436;EGF|0.7943;SPINK5|0.1406;…	61	9660	185	38520	http://www.ebi.ac.uk/QuickGO/GTerm?id=GO:0080090	[]
5	5	cellular response to acid chemical	GO:0071229	0.0097	0.0294	-4.46	-0.3	4.84136	-12.6834	COL6A1|0.3162;AQP1|0.0133;FOLR1|0.2188;KRT13|0.0373	4	172	185	38520	http://www.ebi.ac.uk/QuickGO/GTerm?id=GO:0071229	[]
5	5	endocrine process	GO:0050886	0.00972	0.0294	1.88	0.32	4.84136	-12.6834	MME|2.2284;ACE|8.2414;AQP1|0.0133	3	91	185	38520	http://www.ebi.ac.uk/QuickGO/GTerm?id=GO:0050886	[]
6	6	polysaccharide catabolic process	GO:0000272	0.00974	0.0294	-0.33	0.1	4.84136	-12.6834	GAA|0.6026;MGAM|3.5318	2	31	185	38520	http://www.ebi.ac.uk/QuickGO/GTerm?id=GO:0000272	[]
4	4	organ or tissue specific immune response	GO:0002251	0.00974	0.0294	1.94	0.33	4.84136	-12.6834	LTF|26.7917;APOA4|3.2211	2	31	185	38520	http://www.ebi.ac.uk/QuickGO/GTerm?id=GO:0002251	[]
4	4	maternal placenta development	GO:0001893	0.00974	0.0294	-1.27	0.01	4.84136	-12.6834	CTSB|0.3105;SPP1|0.1738	2	31	185	38520	http://www.ebi.ac.uk/QuickGO/GTerm?id=GO:0001893	[]
8	5,7,8	negative regulation of anion transport	GO:1903792	0.00974	0.0294	-0.86	0.05	4.84136	-12.6834	IL1RN|0.2729;APOE|0.5105	2	31	185	38520	http://www.ebi.ac.uk/QuickGO/GTerm?id=GO:1903792	[]
7	7	purine ribonucleotide metabolic process	GO:0009150	0.00979	0.0296	5.48	0.67	4.84136	-12.6834	PKM|4.9659;ALDOA|2.9923;AQP1|0.0133;PGK1|2.0324;PARK7|5.9704;HSPA8|2.3988;TPI1|2.0893;GAPDH|2.2699;APOE|0.5105	9	739	185	38520	http://www.ebi.ac.uk/QuickGO/GTerm?id=GO:0009150	[]
6	5,6	lipid transport	GO:0006869	0.0098	0.0296	1.55	0.29	4.84136	-12.6834	ACE|8.2414;SERPINA5|0.0698;EGF|0.7943;SLC9A3R1|3.8726;APOE|0.5105;APOA1|10.8643;APOA4|3.2211	7	490	185	38520	http://www.ebi.ac.uk/QuickGO/GTerm?id=GO:0006869	[]
5	5	metanephros development	GO:0001656	0.01	0.0301	-3	-0.16	4.84136	-12.6834	CTSH|0.4699;AQP1|0.0133;FBN1|0.1585	3	92	185	38520	http://www.ebi.ac.uk/QuickGO/GTerm?id=GO:0001656	[]
6	6	dolichol-linked oligosaccharide biosynthetic process	GO:0006488	0.01	0.0301	-0.85	0.05	4.84136	-12.6834	CTSA|0.4571;GLB1|0.52;NEU1|0.597	3	92	185	38520	http://www.ebi.ac.uk/QuickGO/GTerm?id=GO:0006488	[]
5	4,5	viral process	GO:0016032	0.0101	0.0303	6.89	0.81	4.84136	-12.6834	GSN|0.0718;PDCD6IP|2.0701;DPP4|2.3335;LTF|26.7917;VCAM1|9.4624;SERPINB3|0.0377;HSPA8|2.3988;HLA-DRA|1.406;LAMP1|2.6062;APOE|0.5105	10	875	185	38520	http://www.ebi.ac.uk/QuickGO/GTerm?id=GO:0016032	[]
8	7,8	cellular cation homeostasis	GO:0030003	0.0103	0.0309	-0.32	0.1	4.84136	-12.6834	S100A9|0.0619;LTF|26.7917;LCN2|0.2208;CA2|8.7096;SOD1|5.7016;APOE|0.5105;S100A8|0.1644;HEXB|1.3804	8	617	185	38520	http://www.ebi.ac.uk/QuickGO/GTerm?id=GO:0030003	[]
6	5,6	cellular modified amino acid biosynthetic process	GO:0042398	0.0103	0.0309	1.9	0.32	4.84136	-12.6834	CNDP2|2.6303;PARK7|5.9704;GGT1|5.0582	3	93	185	38520	http://www.ebi.ac.uk/QuickGO/GTerm?id=GO:0042398	[]
8	5,8	regulation of systemic arterial blood pressure	GO:0003073	0.0103	0.0309	1.16	0.25	4.84136	-12.6834	MME|2.2284;ACE|8.2414;PRCP|0.0685	3	93	185	38520	http://www.ebi.ac.uk/QuickGO/GTerm?id=GO:0003073	[]
5	5	membrane lipid metabolic process	GO:0006643	0.0104	0.0309	-1.23	0.01	4.84136	-12.6834	CTSA|0.4571;GLB1|0.52;ARSA|0.5754;HEXB|1.3804;NEU1|0.597	5	272	185	38520	http://www.ebi.ac.uk/QuickGO/GTerm?id=GO:0006643	[]
8	8	triglyceride homeostasis	GO:0070328	0.0104	0.0309	1.54	0.29	4.84136	-12.6834	APOA1|10.8643;APOA4|3.2211	2	32	185	38520	http://www.ebi.ac.uk/QuickGO/GTerm?id=GO:0070328	[]
7	7	acylglycerol homeostasis	GO:0055090	0.0104	0.0309	1.54	0.29	4.84136	-12.6834	APOA1|10.8643;APOA4|3.2211	2	32	185	38520	http://www.ebi.ac.uk/QuickGO/GTerm?id=GO:0055090	[]
6	5,6	positive regulation of fatty acid metabolic process	GO:0045923	0.0104	0.0309	1.54	0.29	4.84136	-12.6834	APOA1|10.8643;APOA4|3.2211	2	32	185	38520	http://www.ebi.ac.uk/QuickGO/GTerm?id=GO:0045923	[]
8	7,8	nonribosomal peptide biosynthetic process	GO:0019184	0.0104	0.0309	1.12	0.25	4.84136	-12.6834	CNDP2|2.6303;GGT1|5.0582	2	32	185	38520	http://www.ebi.ac.uk/QuickGO/GTerm?id=GO:0019184	[]
5	4,5	positive regulation of cytokine production	GO:0001819	0.0104	0.0311	-0.56	0.08	4.84136	-12.6834	CD14|0.8241;LUM|0.2421;HSPB1|0.3837;PARK7|5.9704;SOD1|5.7016;C3|1.3804	6	380	185	38520	http://www.ebi.ac.uk/QuickGO/GTerm?id=GO:0001819	[]
7	6,7	cell morphogenesis involved in neuron differentiation	GO:0048667	0.0106	0.0317	2.06	0.34	4.84136	-12.6834	HSP90AA1|2.466;COL6A1|0.3162;HSPA8|2.3988;SPP1|0.1738;FN1|2.3988;SLC9A3R1|3.8726;SOD1|5.7016;APOE|0.5105;CDH11|0.3105	9	749	185	38520	http://www.ebi.ac.uk/QuickGO/GTerm?id=GO:0048667	[]
8	7,8	negative regulation of protein phosphorylation	GO:0001933	0.0107	0.0318	-5.44	-0.4	4.84136	-12.6834	HSPB1|0.3837;SERPINB3|0.0377;PARK7|5.9704;SLC9A3R1|3.8726;SPINK1|0.0113;APOE|0.5105	6	382	185	38520	http://www.ebi.ac.uk/QuickGO/GTerm?id=GO:0001933	[]
5	5	negative regulation of cell development	GO:0010721	0.0108	0.0322	-4.23	-0.28	4.84136	-12.6834	LTF|26.7917;SPP1|0.1738;VASN|0.0982;APOE|0.5105;PI16|0.182	5	275	185	38520	http://www.ebi.ac.uk/QuickGO/GTerm?id=GO:0010721	[]
7	6,7	regulation of tumor necrosis factor production	GO:0032680	0.0109	0.0325	-1.43	0	4.84136	-12.6834	CD14|0.8241;LTF|26.7917;HSPB1|0.3837	3	95	185	38520	http://www.ebi.ac.uk/QuickGO/GTerm?id=GO:0032680	[]
8	7,8	establishment of endothelial barrier	GO:0061028	0.011	0.0325	0.79	0.21	4.84136	-12.6834	MSN|3.9084;RDX|1.5704	2	33	185	38520	http://www.ebi.ac.uk/QuickGO/GTerm?id=GO:0061028	[]
5	5	protein destabilization	GO:0031648	0.011	0.0325	-1.47	-0.01	4.84136	-12.6834	GSN|0.0718;CTSH|0.4699	2	33	185	38520	http://www.ebi.ac.uk/QuickGO/GTerm?id=GO:0031648	[]
8	5,6,7,8	positive regulation of receptor activity	GO:2000273	0.011	0.0325	-0.68	0.07	4.84136	-12.6834	PARK7|5.9704;EGF|0.7943	2	33	185	38520	http://www.ebi.ac.uk/QuickGO/GTerm?id=GO:2000273	[]
4	4	detection of biotic stimulus	GO:0009595	0.011	0.0325	-1.17	0.02	4.84136	-12.6834	PGLYRP1|0.1722;PGLYRP2|0.3945	2	33	185	38520	http://www.ebi.ac.uk/QuickGO/GTerm?id=GO:0009595	[]
7	4,5,6,7	regulation of bone resorption	GO:0045124	0.011	0.0325	-0.18	0.12	4.84136	-12.6834	SPP1|0.1738;CA2|8.7096	2	33	185	38520	http://www.ebi.ac.uk/QuickGO/GTerm?id=GO:0045124	[]
6	6	response to interleukin-4	GO:0070670	0.011	0.0325	-1.07	0.03	4.84136	-12.6834	CTSB|0.3105;IL1RN|0.2729	2	33	185	38520	http://www.ebi.ac.uk/QuickGO/GTerm?id=GO:0070670	[]
7	6,7	ribonucleotide metabolic process	GO:0009259	0.0111	0.033	5.48	0.67	4.84136	-12.6834	PKM|4.9659;ALDOA|2.9923;AQP1|0.0133;PGK1|2.0324;PARK7|5.9704;HSPA8|2.3988;TPI1|2.0893;GAPDH|2.2699;APOE|0.5105	9	755	185	38520	http://www.ebi.ac.uk/QuickGO/GTerm?id=GO:0009259	[]
3	3	multi-organism cellular process	GO:0044764	0.0112	0.033	6.89	0.81	4.84136	-12.6834	GSN|0.0718;PDCD6IP|2.0701;DPP4|2.3335;LTF|26.7917;VCAM1|9.4624;SERPINB3|0.0377;HSPA8|2.3988;HLA-DRA|1.406;LAMP1|2.6062;APOE|0.5105	10	889	185	38520	http://www.ebi.ac.uk/QuickGO/GTerm?id=GO:0044764	[]
8	8	osteoclast differentiation	GO:0030316	0.0112	0.0331	3.02	0.43	4.84136	-12.6834	LTF|26.7917;CA2|8.7096;GLO1|4.4463	3	96	185	38520	http://www.ebi.ac.uk/QuickGO/GTerm?id=GO:0030316	[]
5	5	granulocyte chemotaxis	GO:0071621	0.0112	0.0331	-2.75	-0.14	4.84136	-12.6834	S100A9|0.0619;SPP1|0.1738;S100A8|0.1644	3	96	185	38520	http://www.ebi.ac.uk/QuickGO/GTerm?id=GO:0071621	[]
6	6	tumor necrosis factor production	GO:0032640	0.0112	0.0331	-1.43	0	4.84136	-12.6834	CD14|0.8241;LTF|26.7917;HSPB1|0.3837	3	96	185	38520	http://www.ebi.ac.uk/QuickGO/GTerm?id=GO:0032640	[]
7	7	generation of neurons	GO:0048699	0.0113	0.0334	-9.47	-0.8	4.84136	-12.6834	HSP90AA1|2.466;COL6A1|0.3162;HSPA8|2.3988;SPINK5|0.1406;CDH1|0.8091;SPP1|0.1738;FN1|2.3988;SLC9A3R1|3.8726;SOD1|5.7016;APOE|0.5105;APOA1|10.8643;CDH11|0.3105;APOA4|3.2211;NEU1|0.597;NAGLU|0.5546;KLK6|0.0112	16	1764	185	38520	http://www.ebi.ac.uk/QuickGO/GTerm?id=GO:0048699	[]
6	6	vascular process in circulatory system	GO:0003018	0.0115	0.034	2.19	0.35	4.84136	-12.6834	HBB|1.6749;ACE|8.2414;SOD1|5.7016;APOE|0.5105	4	181	185	38520	http://www.ebi.ac.uk/QuickGO/GTerm?id=GO:0003018	[]
6	6	regulation of endothelial cell proliferation	GO:0001936	0.0116	0.034	-1.16	0.02	4.84136	-12.6834	LRG1|0.8017;CDH13|0.1706;APOE|0.5105	3	97	185	38520	http://www.ebi.ac.uk/QuickGO/GTerm?id=GO:0001936	[]
7	3,4,7	T cell mediated cytotoxicity	GO:0001913	0.0116	0.0342	-0.84	0.05	4.84136	-12.6834	CTSC|0.3076;CTSH|0.4699	2	34	185	38520	http://www.ebi.ac.uk/QuickGO/GTerm?id=GO:0001913	[]
7	6,7	regulation of fatty acid biosynthetic process	GO:0042304	0.0116	0.0342	1.54	0.29	4.84136	-12.6834	APOA1|10.8643;APOA4|3.2211	2	34	185	38520	http://www.ebi.ac.uk/QuickGO/GTerm?id=GO:0042304	[]
7	6,7	apoptotic cell clearance	GO:0043277	0.0116	0.0342	0.32	0.17	4.84136	-12.6834	C3|1.3804;C4A|0.3467	2	34	185	38520	http://www.ebi.ac.uk/QuickGO/GTerm?id=GO:0043277	[]
5	5	cellular response to transforming growth factor beta stimulus	GO:0071560	0.0118	0.0345	-3.6	-0.22	4.84136	-12.6834	LRG1|0.8017;FOLR1|0.2188;FBN1|0.1585;VASN|0.0982;APOA1|10.8643	5	281	185	38520	http://www.ebi.ac.uk/QuickGO/GTerm?id=GO:0071560	[]
6	5,6	positive regulation of protein catabolic process	GO:0045732	0.0118	0.0345	-0.79	0.06	4.84136	-12.6834	MSN|3.9084;CTSC|0.3076;RDX|1.5704;EGF|0.7943;APOE|0.5105	5	281	185	38520	http://www.ebi.ac.uk/QuickGO/GTerm?id=GO:0045732	[]
6	6	homophilic cell adhesion via plasma membrane adhesion molecules	GO:0007156	0.0118	0.0345	-2.66	-0.13	4.84136	-12.6834	PCDH1|0.4285;DSC2|0.118;CDH1|0.8091;CDH13|0.1706;CDH11|0.3105	5	281	185	38520	http://www.ebi.ac.uk/QuickGO/GTerm?id=GO:0007156	[]
6	5,6	regulation of tumor necrosis factor superfamily cytokine production	GO:1903555	0.0119	0.0347	-1.43	0	4.84136	-12.6834	CD14|0.8241;LTF|26.7917;HSPB1|0.3837	3	98	185	38520	http://www.ebi.ac.uk/QuickGO/GTerm?id=GO:1903555	[]
6	4,6	positive regulation of epithelial cell migration	GO:0010634	0.0119	0.0347	-2.62	-0.12	4.84136	-12.6834	HSPB1|0.3837;CTSH|0.4699;AQP1|0.0133	3	98	185	38520	http://www.ebi.ac.uk/QuickGO/GTerm?id=GO:0010634	[]
4	4	response to transforming growth factor beta	GO:0071559	0.012	0.0349	-3.6	-0.22	4.84136	-12.6834	LRG1|0.8017;FOLR1|0.2188;FBN1|0.1585;VASN|0.0982;APOA1|10.8643	5	282	185	38520	http://www.ebi.ac.uk/QuickGO/GTerm?id=GO:0071559	[]
6	5,6	protein localization to membrane	GO:0072657	0.012	0.0349	5.33	0.66	4.84136	-12.6834	PDZK1|11.695;HSP90AA1|2.466;GSN|0.0718;YWHAZ|2.704;CDH1|0.8091;SLC9A3R1|3.8726;APOE|0.5105;CPE|21.0863	8	634	185	38520	http://www.ebi.ac.uk/QuickGO/GTerm?id=GO:0072657	[]
8	4,5,6,8	regulation of defense response to virus	GO:0050688	0.012	0.0349	-0.52	0.08	4.84136	-12.6834	MYLK|0.7516;MDH1|2.7542;ANXA5|14.0605;KRT6A|0.1127	4	183	185	38520	http://www.ebi.ac.uk/QuickGO/GTerm?id=GO:0050688	[]
5	5	central nervous system development	GO:0007417	0.0121	0.0353	-10.12	-0.86	4.84136	-12.6834	GSN|0.0718;VTN|0.0809;AQP1|0.0133;CKB|15.1356;EGF|0.7943;CDH1|0.8091;LRP2|0.1459;SERPINI1|12.1339;CDH11|0.3105;NAGLU|0.5546;KLK6|0.0112	11	1039	185	38520	http://www.ebi.ac.uk/QuickGO/GTerm?id=GO:0007417	[]
6	6	positive regulation of DNA binding	GO:0043388	0.0123	0.0358	-0.68	0.07	4.84136	-12.6834	PARK7|5.9704;EGF|0.7943	2	35	185	38520	http://www.ebi.ac.uk/QuickGO/GTerm?id=GO:0043388	[]
6	6	cellular response to growth factor stimulus	GO:0071363	0.0123	0.0359	-7.32	-0.58	4.84136	-12.6834	LRG1|0.8017;VTN|0.0809;HSPB1|0.3837;FOLR1|0.2188;EGF|0.7943;CD63|5.7016;FBN1|0.1585;VASN|0.0982;CAT|22.4905;APOA1|10.8643	10	903	185	38520	http://www.ebi.ac.uk/QuickGO/GTerm?id=GO:0071363	[]
7	5,6,7	cellular response to starvation	GO:0009267	0.0124	0.036	2	0.33	4.84136	-12.6834	MYLK|0.7516;MDH1|2.7542;PARK7|5.9704;DSC2|0.118;AOC1|2.0701;ANXA5|14.0605;KRT6A|0.1127	7	513	185	38520	http://www.ebi.ac.uk/QuickGO/GTerm?id=GO:0009267	[]
6	6	cellular response to alcohol	GO:0097306	0.0125	0.0364	-0.59	0.08	4.84136	-12.6834	MSN|3.9084;AQP1|0.0133;CDH1|0.8091	3	100	185	38520	http://www.ebi.ac.uk/QuickGO/GTerm?id=GO:0097306	[]
5	5	carbohydrate derivative biosynthetic process	GO:1901137	0.0129	0.0373	-7.4	-0.59	4.84136	-12.6834	PKM|4.9659;ALDOA|2.9923;LUM|0.2421;AQP1|0.0133;BGN|0.1995;EGF|0.7943;CTSA|0.4571;GLB1|0.52;LRP2|0.1459;APOE|0.5105;MAN1A1|0.1096;NEU1|0.597	12	1191	185	38520	http://www.ebi.ac.uk/QuickGO/GTerm?id=GO:1901137	[]
8	4,7,8	positive regulation of protein localization to nucleus	GO:1900182	0.0129	0.0373	-0.78	0.06	4.84136	-12.6834	PARK7|5.9704;EGF|0.7943;CDH1|0.8091	3	101	185	38520	http://www.ebi.ac.uk/QuickGO/GTerm?id=GO:1900182	[]
7	6,7	aerobic respiration	GO:0009060	0.0129	0.0373	2.63	0.39	4.84136	-12.6834	MDH1|2.7542;CAT|22.4905;IDH1|6.9183	3	101	185	38520	http://www.ebi.ac.uk/QuickGO/GTerm?id=GO:0009060	[]
6	5,6	positive regulation of inflammatory response	GO:0050729	0.0129	0.0373	-0.14	0.12	4.84136	-12.6834	S100A9|0.0619;S100A8|0.1644;C3|1.3804	3	101	185	38520	http://www.ebi.ac.uk/QuickGO/GTerm?id=GO:0050729	[]
5	5	interferon-gamma production	GO:0032609	0.0129	0.0373	-0.93	0.04	4.84136	-12.6834	PGLYRP1|0.1722;PGLYRP2|0.3945;SCGB1A1|8.5507	3	101	185	38520	http://www.ebi.ac.uk/QuickGO/GTerm?id=GO:0032609	[]
5	5	tumor necrosis factor superfamily cytokine production	GO:0071706	0.0129	0.0373	-1.43	0	4.84136	-12.6834	CD14|0.8241;LTF|26.7917;HSPB1|0.3837	3	101	185	38520	http://www.ebi.ac.uk/QuickGO/GTerm?id=GO:0071706	[]
6	4,5,6	positive regulation of organelle assembly	GO:1902117	0.013	0.0375	0.87	0.22	4.84136	-12.6834	PDCD6IP|2.0701;LCP1|3.5645	2	36	185	38520	http://www.ebi.ac.uk/QuickGO/GTerm?id=GO:1902117	[]
4	4	response to fluid shear stress	GO:0034405	0.013	0.0375	-0.18	0.12	4.84136	-12.6834	SPP1|0.1738;CA2|8.7096	2	36	185	38520	http://www.ebi.ac.uk/QuickGO/GTerm?id=GO:0034405	[]
5	4,5	plasma lipoprotein particle clearance	GO:0034381	0.013	0.0375	-0.74	0.06	4.84136	-12.6834	APOE|0.5105;APOA1|10.8643	2	36	185	38520	http://www.ebi.ac.uk/QuickGO/GTerm?id=GO:0034381	[]
8	5,6,7,8	positive regulation of lymphocyte activation	GO:0051251	0.013	0.0375	3.06	0.44	4.84136	-12.6834	DPP4|2.3335;VCAM1|9.4624;HLA-DRA|1.406;IGFBP2|0.0698;LAMP1|2.6062	5	288	185	38520	http://www.ebi.ac.uk/QuickGO/GTerm?id=GO:0051251	[]
6	5,6	positive regulation of gene expression	GO:0010628	0.0131	0.0377	5.04	0.63	4.84136	-12.6834	GSN|0.0718;LUM|0.2421;MSN|3.9084;S100A9|0.0619;LTF|26.7917;CTSH|0.4699;RDX|1.5704;PARK7|5.9704;HSPA8|2.3988;EGF|0.7943;CDH1|0.8091;CDH13|0.1706;FN1|2.3988;CAT|22.4905;S100A8|0.1644;C3|1.3804;HEXB|1.3804	17	1949	185	38520	http://www.ebi.ac.uk/QuickGO/GTerm?id=GO:0010628	[]
8	7,8	regulation of protein targeting	GO:1903533	0.0132	0.0379	0.19	0.15	4.84136	-12.6834	PDZK1|11.695;EGF|0.7943;CDH1|0.8091;SLC9A3R1|3.8726;PRDX1|2.9107	5	289	185	38520	http://www.ebi.ac.uk/QuickGO/GTerm?id=GO:1903533	[]
8	7,8	monocarboxylic acid transport	GO:0015718	0.0133	0.0384	2.86	0.42	4.84136	-12.6834	PDZK1|11.695;ACE|8.2414;SLC9A3R1|3.8726;APOE|0.5105	4	189	185	38520	http://www.ebi.ac.uk/QuickGO/GTerm?id=GO:0015718	[]
5	5	regulation of epithelial cell proliferation	GO:0050678	0.0135	0.0387	-2.34	-0.09	4.84136	-12.6834	LRG1|0.8017;CDH1|0.8091;CDH13|0.1706;KRT4|0.0817;APOE|0.5105	5	291	185	38520	http://www.ebi.ac.uk/QuickGO/GTerm?id=GO:0050678	[]
9	8,9	cellular metal ion homeostasis	GO:0006875	0.0136	0.0387	-2.32	-0.09	4.84136	-12.6834	S100A9|0.0619;LTF|26.7917;LCN2|0.2208;SOD1|5.7016;APOE|0.5105;S100A8|0.1644;HEXB|1.3804	7	523	185	38520	http://www.ebi.ac.uk/QuickGO/GTerm?id=GO:0006875	[]
6	5,6	positive regulation of nitric oxide metabolic process	GO:1904407	0.0137	0.0387	0.62	0.2	4.84136	-12.6834	HBB|1.6749;HSP90AA1|2.466	2	37	185	38520	http://www.ebi.ac.uk/QuickGO/GTerm?id=GO:1904407	[]
5	5	keratinocyte proliferation	GO:0043616	0.0137	0.0387	-0.35	0.1	4.84136	-12.6834	KRT2|13.0617;CDH13|0.1706	2	37	185	38520	http://www.ebi.ac.uk/QuickGO/GTerm?id=GO:0043616	[]
7	6,7	regulation of smooth muscle cell migration	GO:0014910	0.0137	0.0387	0.18	0.15	4.84136	-12.6834	VTN|0.0809;ACE|8.2414	2	37	185	38520	http://www.ebi.ac.uk/QuickGO/GTerm?id=GO:0014910	[]
7	6,7	sphingolipid catabolic process	GO:0030149	0.0137	0.0387	0.08	0.14	4.84136	-12.6834	HEXB|1.3804;NEU1|0.597	2	37	185	38520	http://www.ebi.ac.uk/QuickGO/GTerm?id=GO:0030149	[]
7	6,7	positive regulation of nitric oxide biosynthetic process	GO:0045429	0.0137	0.0387	0.62	0.2	4.84136	-12.6834	HBB|1.6749;HSP90AA1|2.466	2	37	185	38520	http://www.ebi.ac.uk/QuickGO/GTerm?id=GO:0045429	[]
7	5,6,7	virion assembly	GO:0019068	0.0137	0.0387	-0.02	0.13	4.84136	-12.6834	PDCD6IP|2.0701;APOE|0.5105	2	37	185	38520	http://www.ebi.ac.uk/QuickGO/GTerm?id=GO:0019068	[]
5	5	neuron death	GO:0070997	0.0137	0.0387	2.24	0.36	4.84136	-12.6834	PARK7|5.9704;GAPDH|2.2699;SOD1|5.7016;APOE|0.5105;KLK6|0.0112	5	292	185	38520	http://www.ebi.ac.uk/QuickGO/GTerm?id=GO:0070997	[]
4	4	ammonium ion metabolic process	GO:0097164	0.0138	0.0387	3.85	0.51	4.84136	-12.6834	FABP5|0.0296;PARK7|5.9704;APOA1|10.8643;APOA4|3.2211	4	191	185	38520	http://www.ebi.ac.uk/QuickGO/GTerm?id=GO:0097164	[]
8	6,7,8	mitophagy	GO:0000422	0.0139	0.0387	1.07	0.24	4.84136	-12.6834	MYLK|0.7516;MDH1|2.7542;PARK7|5.9704;ANXA5|14.0605;KRT6A|0.1127	5	293	185	38520	http://www.ebi.ac.uk/QuickGO/GTerm?id=GO:0000422	[]
7	6,7	mitochondrion disassembly	GO:0061726	0.0139	0.0387	1.07	0.24	4.84136	-12.6834	MYLK|0.7516;MDH1|2.7542;PARK7|5.9704;ANXA5|14.0605;KRT6A|0.1127	5	293	185	38520	http://www.ebi.ac.uk/QuickGO/GTerm?id=GO:0061726	[]
8	5,7,8	regulation of endothelial cell migration	GO:0010594	0.0139	0.0387	-2.1	-0.07	4.84136	-12.6834	HSPB1|0.3837;APOE|0.5105;SH3BGRL3|0.0409	3	104	185	38520	http://www.ebi.ac.uk/QuickGO/GTerm?id=GO:0010594	[]
6	6	water-soluble vitamin metabolic process	GO:0006767	0.0139	0.0387	-1.81	-0.04	4.84136	-12.6834	FOLR1|0.2188;CUBN|0.1067;ACPP|64.2688	3	104	185	38520	http://www.ebi.ac.uk/QuickGO/GTerm?id=GO:0006767	[]
4	3,4	regulation of cellular component biogenesis	GO:0044087	0.014	0.0387	7.7	0.89	4.84136	-12.6834	GSN|0.0718;PDCD6IP|2.0701;MSN|3.9084;LCP1|3.5645;ACE|8.2414;AQP1|0.0133;RDX|1.5704;PARK7|5.9704;APOE|0.5105;APOA1|10.8643	10	921	185	38520	http://www.ebi.ac.uk/QuickGO/GTerm?id=GO:0044087	[]
5	5	ribose phosphate metabolic process	GO:0019693	0.0143	0.0387	5.48	0.67	4.84136	-12.6834	PKM|4.9659;ALDOA|2.9923;AQP1|0.0133;PGK1|2.0324;PARK7|5.9704;HSPA8|2.3988;TPI1|2.0893;GAPDH|2.2699;APOE|0.5105	9	787	185	38520	http://www.ebi.ac.uk/QuickGO/GTerm?id=GO:0019693	[]
8	8	actin filament depolymerization	GO:0030042	0.0143	0.0387	-0.2	0.12	4.84136	-12.6834	GSN|0.0718;RDX|1.5704;SH3BGRL3|0.0409	3	105	185	38520	http://www.ebi.ac.uk/QuickGO/GTerm?id=GO:0030042	[]
7	6,7	regulation of tumor necrosis factor (ligand) superfamily member 11 production	GO:2000307	0.0143	0.0387	0	0.14	4.84136	-12.6834	LTF|26.7917	1	3	185	38520	http://www.ebi.ac.uk/QuickGO/GTerm?id=GO:2000307	[]
9	9	regulation of renal output by angiotensin	GO:0002019	0.0143	0.0387	0	0.14	4.84136	-12.6834	ACE|8.2414	1	3	185	38520	http://www.ebi.ac.uk/QuickGO/GTerm?id=GO:0002019	[]
7	7	glycolate metabolic process	GO:0009441	0.0143	0.0387	0	0.14	4.84136	-12.6834	PARK7|5.9704	1	3	185	38520	http://www.ebi.ac.uk/QuickGO/GTerm?id=GO:0009441	[]
7	6,7	aorta smooth muscle tissue morphogenesis	GO:0060414	0.0143	0.0387	0	0.14	4.84136	-12.6834	MYLK|0.7516	1	3	185	38520	http://www.ebi.ac.uk/QuickGO/GTerm?id=GO:0060414	[]
10	8,9,10	regulation of tau-protein kinase activity	GO:1902947	0.0143	0.0387	0	0.14	4.84136	-12.6834	APOE|0.5105	1	3	185	38520	http://www.ebi.ac.uk/QuickGO/GTerm?id=GO:1902947	[]
6	6	transforming growth factor-beta secretion	GO:0038044	0.0143	0.0387	0	0.14	4.84136	-12.6834	FN1|2.3988	1	3	185	38520	http://www.ebi.ac.uk/QuickGO/GTerm?id=GO:0038044	[]
8	6,7,8	regulation of interleukin-1-mediated signaling pathway	GO:2000659	0.0143	0.0387	0	0.14	4.84136	-12.6834	IL1RN|0.2729	1	3	185	38520	http://www.ebi.ac.uk/QuickGO/GTerm?id=GO:2000659	[]
8	6,7,8	negative regulation of nitric oxide mediated signal transduction	GO:0010751	0.0143	0.0387	0	0.14	4.84136	-12.6834	SPINK1|0.0113	1	3	185	38520	http://www.ebi.ac.uk/QuickGO/GTerm?id=GO:0010751	[]
11	6,7,8,9,10,11	positive regulation of oxidative phosphorylation	GO:1903862	0.0143	0.0387	0	0.14	4.84136	-12.6834	PARK7|5.9704	1	3	185	38520	http://www.ebi.ac.uk/QuickGO/GTerm?id=GO:1903862	[]
9	7,9	regulation of plasma lipoprotein particle oxidation	GO:0034444	0.0143	0.0387	0	0.14	4.84136	-12.6834	APOA4|3.2211	1	3	185	38520	http://www.ebi.ac.uk/QuickGO/GTerm?id=GO:0034444	[]
4	4	negative regulation of very-low-density lipoprotein particle remodeling	GO:0010903	0.0143	0.0387	0	0.14	4.84136	-12.6834	APOA1|10.8643	1	3	185	38520	http://www.ebi.ac.uk/QuickGO/GTerm?id=GO:0010903	[]
6	6	tumor necrosis factor (ligand) superfamily member 11 production	GO:0072535	0.0143	0.0387	0	0.14	4.84136	-12.6834	LTF|26.7917	1	3	185	38520	http://www.ebi.ac.uk/QuickGO/GTerm?id=GO:0072535	[]
11	6,7,8,10,11	sequestering of BMP in extracellular matrix	GO:0035582	0.0143	0.0387	0	0.14	4.84136	-12.6834	FBN1|0.1585	1	3	185	38520	http://www.ebi.ac.uk/QuickGO/GTerm?id=GO:0035582	[]
8	6,7,8	negative regulation of transforming growth factor-beta secretion	GO:2001202	0.0143	0.0387	0	0.14	4.84136	-12.6834	FN1|2.3988	1	3	185	38520	http://www.ebi.ac.uk/QuickGO/GTerm?id=GO:2001202	[]
4	4	positive regulation of protein activation cascade	GO:2000259	0.0143	0.0387	0	0.14	4.84136	-12.6834	C3|1.3804	1	3	185	38520	http://www.ebi.ac.uk/QuickGO/GTerm?id=GO:2000259	[]
9	7,8,9	negative regulation of intrinsic apoptotic signaling pathway in response to hydrogen peroxide	GO:1903751	0.0143	0.0387	0	0.14	4.84136	-12.6834	PARK7|5.9704	1	3	185	38520	http://www.ebi.ac.uk/QuickGO/GTerm?id=GO:1903751	[]
7	5,6,7	regulation of hydrogen peroxide catabolic process	GO:2000295	0.0143	0.0387	0	0.14	4.84136	-12.6834	HP|34.3558	1	3	185	38520	http://www.ebi.ac.uk/QuickGO/GTerm?id=GO:2000295	[]
6	6	regulation of postsynaptic membrane organization	GO:1901626	0.0143	0.0387	0	0.14	4.84136	-12.6834	APOE|0.5105	1	3	185	38520	http://www.ebi.ac.uk/QuickGO/GTerm?id=GO:1901626	[]
9	7,9	negative regulation of plasma lipoprotein particle oxidation	GO:0034445	0.0143	0.0387	0	0.14	4.84136	-12.6834	APOA4|3.2211	1	3	185	38520	http://www.ebi.ac.uk/QuickGO/GTerm?id=GO:0034445	[]
6	6	cellular response to low-density lipoprotein particle stimulus	GO:0071404	0.0143	0.0387	0	0.14	4.84136	-12.6834	CDH13|0.1706	1	3	185	38520	http://www.ebi.ac.uk/QuickGO/GTerm?id=GO:0071404	[]
9	8,9	dipeptide transport	GO:0042938	0.0143	0.0387	0	0.14	4.84136	-12.6834	CA2|8.7096	1	3	185	38520	http://www.ebi.ac.uk/QuickGO/GTerm?id=GO:0042938	[]
9	8,9	positive regulation of serine-type endopeptidase activity	GO:1900005	0.0143	0.0387	0	0.14	4.84136	-12.6834	SEMG1|41.6869	1	3	185	38520	http://www.ebi.ac.uk/QuickGO/GTerm?id=GO:1900005	[]
5	5	response to antipsychotic drug	GO:0097332	0.0143	0.0387	0	0.14	4.84136	-12.6834	SOD1|5.7016	1	3	185	38520	http://www.ebi.ac.uk/QuickGO/GTerm?id=GO:0097332	[]
6	6	neurofibrillary tangle assembly	GO:1902988	0.0143	0.0387	0	0.14	4.84136	-12.6834	APOE|0.5105	1	3	185	38520	http://www.ebi.ac.uk/QuickGO/GTerm?id=GO:1902988	[]
8	7,8	positive regulation of serine-type peptidase activity	GO:1902573	0.0143	0.0387	0	0.14	4.84136	-12.6834	SEMG1|41.6869	1	3	185	38520	http://www.ebi.ac.uk/QuickGO/GTerm?id=GO:1902573	[]
10	4,6,8,10	angiotensin catabolic process in blood	GO:0002005	0.0143	0.0387	0	0.14	4.84136	-12.6834	ACE|8.2414	1	3	185	38520	http://www.ebi.ac.uk/QuickGO/GTerm?id=GO:0002005	[]
9	6,7,9	chylomicron remodeling	GO:0034371	0.0143	0.0387	0	0.14	4.84136	-12.6834	APOA4|3.2211	1	3	185	38520	http://www.ebi.ac.uk/QuickGO/GTerm?id=GO:0034371	[]
5	5	positive regulation of complement activation	GO:0045917	0.0143	0.0387	0	0.14	4.84136	-12.6834	C3|1.3804	1	3	185	38520	http://www.ebi.ac.uk/QuickGO/GTerm?id=GO:0045917	[]
9	5,6,7,8,9	regulation of androgen receptor activity	GO:2000823	0.0143	0.0387	0	0.14	4.84136	-12.6834	PARK7|5.9704	1	3	185	38520	http://www.ebi.ac.uk/QuickGO/GTerm?id=GO:2000823	[]
7	4,5,6,7	kinin cascade	GO:0002254	0.0143	0.0387	0	0.14	4.84136	-12.6834	PRCP|0.0685	1	3	185	38520	http://www.ebi.ac.uk/QuickGO/GTerm?id=GO:0002254	[]
7	6,7	regulation of oxidative phosphorylation uncoupler activity	GO:2000275	0.0143	0.0387	0	0.14	4.84136	-12.6834	PARK7|5.9704	1	3	185	38520	http://www.ebi.ac.uk/QuickGO/GTerm?id=GO:2000275	[]
7	7	regulation of ubiquitin-specific protease activity	GO:2000152	0.0143	0.0387	0	0.14	4.84136	-12.6834	PARK7|5.9704	1	3	185	38520	http://www.ebi.ac.uk/QuickGO/GTerm?id=GO:2000152	[]
6	5,6	hexitol metabolic process	GO:0006059	0.0143	0.0387	0	0.14	4.84136	-12.6834	SORD|13.1826	1	3	185	38520	http://www.ebi.ac.uk/QuickGO/GTerm?id=GO:0006059	[]
7	6,7	cellular response to mercury ion	GO:0071288	0.0143	0.0387	0	0.14	4.84136	-12.6834	AQP1|0.0133	1	3	185	38520	http://www.ebi.ac.uk/QuickGO/GTerm?id=GO:0071288	[]
8	6,7,8	regulation of adenosine receptor signaling pathway	GO:0060167	0.0143	0.0387	0	0.14	4.84136	-12.6834	ACPP|64.2688	1	3	185	38520	http://www.ebi.ac.uk/QuickGO/GTerm?id=GO:0060167	[]
6	6	regulation of superoxide dismutase activity	GO:1901668	0.0143	0.0387	0	0.14	4.84136	-12.6834	PARK7|5.9704	1	3	185	38520	http://www.ebi.ac.uk/QuickGO/GTerm?id=GO:1901668	[]
9	7,8,9	regulation of intrinsic apoptotic signaling pathway in response to hydrogen peroxide	GO:1903750	0.0143	0.0387	0	0.14	4.84136	-12.6834	PARK7|5.9704	1	3	185	38520	http://www.ebi.ac.uk/QuickGO/GTerm?id=GO:1903750	[]
8	6,8	regulation of neutrophil extravasation	GO:2000389	0.0143	0.0387	0	0.14	4.84136	-12.6834	OLFM4|10.7647	1	3	185	38520	http://www.ebi.ac.uk/QuickGO/GTerm?id=GO:2000389	[]
5	5	stress response to copper ion	GO:1990169	0.0143	0.0387	0	0.14	4.84136	-12.6834	PARK7|5.9704	1	3	185	38520	http://www.ebi.ac.uk/QuickGO/GTerm?id=GO:1990169	[]
9	7,8,9	negative regulation of hydrogen peroxide-induced neuron death	GO:1903208	0.0143	0.0387	0	0.14	4.84136	-12.6834	PARK7|5.9704	1	3	185	38520	http://www.ebi.ac.uk/QuickGO/GTerm?id=GO:1903208	[]
10	6,8,10	diaphragm contraction	GO:0002086	0.0143	0.0387	0	0.14	4.84136	-12.6834	GAA|0.6026	1	3	185	38520	http://www.ebi.ac.uk/QuickGO/GTerm?id=GO:0002086	[]
8	5,6,7,8	plasma kallikrein-kinin cascade	GO:0002353	0.0143	0.0387	0	0.14	4.84136	-12.6834	PRCP|0.0685	1	3	185	38520	http://www.ebi.ac.uk/QuickGO/GTerm?id=GO:0002353	[]
5	5	amino-acid betaine catabolic process	GO:0006579	0.0143	0.0387	0	0.14	4.84136	-12.6834	BHMT|0.8166	1	3	185	38520	http://www.ebi.ac.uk/QuickGO/GTerm?id=GO:0006579	[]
7	7	cellular response to norepinephrine stimulus	GO:0071874	0.0143	0.0387	0	0.14	4.84136	-12.6834	IL1RN|0.2729	1	3	185	38520	http://www.ebi.ac.uk/QuickGO/GTerm?id=GO:0071874	[]
8	7,8	metanephric proximal tubule development	GO:0072237	0.0143	0.0387	0	0.14	4.84136	-12.6834	AQP1|0.0133	1	3	185	38520	http://www.ebi.ac.uk/QuickGO/GTerm?id=GO:0072237	[]
6	6	courtship behavior	GO:0007619	0.0143	0.0387	0	0.14	4.84136	-12.6834	HEXB|1.3804	1	3	185	38520	http://www.ebi.ac.uk/QuickGO/GTerm?id=GO:0007619	[]
6	5,6	negative regulation of cell growth involved in cardiac muscle cell development	GO:0061052	0.0143	0.0387	0	0.14	4.84136	-12.6834	PI16|0.182	1	3	185	38520	http://www.ebi.ac.uk/QuickGO/GTerm?id=GO:0061052	[]
8	7,8	regulation of hydrogen peroxide-induced neuron death	GO:1903207	0.0143	0.0387	0	0.14	4.84136	-12.6834	PARK7|5.9704	1	3	185	38520	http://www.ebi.ac.uk/QuickGO/GTerm?id=GO:1903207	[]
4	4	cellular response to redox state	GO:0071461	0.0143	0.0387	0	0.14	4.84136	-12.6834	VASN|0.0982	1	3	185	38520	http://www.ebi.ac.uk/QuickGO/GTerm?id=GO:0071461	[]
6	5,6	detoxification of copper ion	GO:0010273	0.0143	0.0387	0	0.14	4.84136	-12.6834	PARK7|5.9704	1	3	185	38520	http://www.ebi.ac.uk/QuickGO/GTerm?id=GO:0010273	[]
8	7,8	neuron death in response to hydrogen peroxide	GO:0036476	0.0143	0.0387	0	0.14	4.84136	-12.6834	PARK7|5.9704	1	3	185	38520	http://www.ebi.ac.uk/QuickGO/GTerm?id=GO:0036476	[]
4	4	cell proliferation in bone marrow	GO:0071838	0.0143	0.0387	0	0.14	4.84136	-12.6834	ACE|8.2414	1	3	185	38520	http://www.ebi.ac.uk/QuickGO/GTerm?id=GO:0071838	[]
5	5	negative regulation of sperm motility	GO:1901318	0.0143	0.0387	0	0.14	4.84136	-12.6834	SEMG1|41.6869	1	3	185	38520	http://www.ebi.ac.uk/QuickGO/GTerm?id=GO:1901318	[]
11	8,9,10,11	positive regulation of keratinocyte apoptotic process	GO:1902174	0.0143	0.0387	0	0.14	4.84136	-12.6834	GSN|0.0718	1	3	185	38520	http://www.ebi.ac.uk/QuickGO/GTerm?id=GO:1902174	[]
8	8	cellular response to UV-A	GO:0071492	0.0143	0.0387	0	0.14	4.84136	-12.6834	MME|2.2284	1	3	185	38520	http://www.ebi.ac.uk/QuickGO/GTerm?id=GO:0071492	[]
7	5,6,7	regulation of thyroid hormone mediated signaling pathway	GO:0002155	0.0143	0.0387	0	0.14	4.84136	-12.6834	PRCP|0.0685	1	3	185	38520	http://www.ebi.ac.uk/QuickGO/GTerm?id=GO:0002155	[]
10	7,8,9,10	dichotomous subdivision of terminal units involved in lung branching	GO:0060448	0.0143	0.0387	0	0.14	4.84136	-12.6834	CTSH|0.4699	1	3	185	38520	http://www.ebi.ac.uk/QuickGO/GTerm?id=GO:0060448	[]
10	9,10	positive regulation of peptidyl-tyrosine autophosphorylation	GO:1900086	0.0143	0.0387	0	0.14	4.84136	-12.6834	ACE|8.2414	1	3	185	38520	http://www.ebi.ac.uk/QuickGO/GTerm?id=GO:1900086	[]
7	7	renal protein absorption	GO:0097017	0.0143	0.0387	0	0.14	4.84136	-12.6834	GSN|0.0718	1	3	185	38520	http://www.ebi.ac.uk/QuickGO/GTerm?id=GO:0097017	[]
6	5,6	insulin processing	GO:0030070	0.0143	0.0387	0	0.14	4.84136	-12.6834	CPE|21.0863	1	3	185	38520	http://www.ebi.ac.uk/QuickGO/GTerm?id=GO:0030070	[]
8	6,7,8	sequestering of TGFbeta in extracellular matrix	GO:0035583	0.0143	0.0387	0	0.14	4.84136	-12.6834	FBN1|0.1585	1	3	185	38520	http://www.ebi.ac.uk/QuickGO/GTerm?id=GO:0035583	[]
7	6,7	regulation of transforming growth factor-beta secretion	GO:2001201	0.0143	0.0387	0	0.14	4.84136	-12.6834	FN1|2.3988	1	3	185	38520	http://www.ebi.ac.uk/QuickGO/GTerm?id=GO:2001201	[]
6	6	antibacterial peptide biosynthetic process	GO:0002780	0.0143	0.0387	0	0.14	4.84136	-12.6834	MMP7|0.0817	1	3	185	38520	http://www.ebi.ac.uk/QuickGO/GTerm?id=GO:0002780	[]
6	6	regulation of organelle transport along microtubule	GO:1902513	0.0143	0.0387	0	0.14	4.84136	-12.6834	LAMP1|2.6062	1	3	185	38520	http://www.ebi.ac.uk/QuickGO/GTerm?id=GO:1902513	[]
8	5,7,8	antimicrobial peptide biosynthetic process	GO:0002777	0.0143	0.0387	0	0.14	4.84136	-12.6834	MMP7|0.0817	1	3	185	38520	http://www.ebi.ac.uk/QuickGO/GTerm?id=GO:0002777	[]
6	5,6	regulation of neurofibrillary tangle assembly	GO:1902996	0.0143	0.0387	0	0.14	4.84136	-12.6834	APOE|0.5105	1	3	185	38520	http://www.ebi.ac.uk/QuickGO/GTerm?id=GO:1902996	[]
6	5,6	autocrine signaling	GO:0035425	0.0143	0.0387	0	0.14	4.84136	-12.6834	SERPINB3|0.0377	1	3	185	38520	http://www.ebi.ac.uk/QuickGO/GTerm?id=GO:0035425	[]
6	6	multicellular organismal lipid catabolic process	GO:0044240	0.0143	0.0387	0	0.14	4.84136	-12.6834	APOA4|3.2211	1	3	185	38520	http://www.ebi.ac.uk/QuickGO/GTerm?id=GO:0044240	[]
10	8,9,10	Golgi to lysosome transport	GO:0090160	0.0143	0.0387	0	0.14	4.84136	-12.6834	LAMP1|2.6062	1	3	185	38520	http://www.ebi.ac.uk/QuickGO/GTerm?id=GO:0090160	[]
6	5,6	regulation of gastrulation	GO:0010470	0.0144	0.0387	-0.47	0.09	4.84136	-12.6834	IL1RN|0.2729;APOA1|10.8643	2	38	185	38520	http://www.ebi.ac.uk/QuickGO/GTerm?id=GO:0010470	[]
9	8,9	vascular endothelial growth factor signaling pathway	GO:0038084	0.0144	0.0387	-0.34	0.1	4.84136	-12.6834	HSPB1|0.3837;CD63|5.7016	2	38	185	38520	http://www.ebi.ac.uk/QuickGO/GTerm?id=GO:0038084	[]
8	6,7,8	early endosome to late endosome transport	GO:0045022	0.0144	0.0387	0.79	0.21	4.84136	-12.6834	MSN|3.9084;RDX|1.5704	2	38	185	38520	http://www.ebi.ac.uk/QuickGO/GTerm?id=GO:0045022	[]
6	5,6	regulation of bone remodeling	GO:0046850	0.0144	0.0387	-0.18	0.12	4.84136	-12.6834	SPP1|0.1738;CA2|8.7096	2	38	185	38520	http://www.ebi.ac.uk/QuickGO/GTerm?id=GO:0046850	[]
5	5	phosphate-containing compound metabolic process	GO:0006796	0.0148	0.0397	28.14	2.9	4.84136	-12.6834	PKM|4.9659;ALDOA|2.9923;MYLK|0.7516;MDH1|2.7542;PRDX6|8.9536;VTN|0.0809;LTF|26.7917;AHSG|0.1432;ACE|8.2414;HSPB1|0.3837;CTSH|0.4699;AQP1|0.0133;PGK1|2.0324;SERPINB3|0.0377;CKB|15.1356;FABP5|0.0296;PARK7|5.9704;HSPA8|2.3988;EGF|0.7943;TFF2|0.2655;CRYAB|0.2333;TPI1|2.0893;GAPDH|2.2699;FN1|2.3988;ACPP|64.2688;SLC9A3R1|3.8726;PRDX1|2.9107;PTPRN|0.7047;CAT|22.4905;SPINK1|0.0113;SOD1|5.7016;IL1RN|0.272…	38	5563	185	38520	http://www.ebi.ac.uk/QuickGO/GTerm?id=GO:0006796	[]
11	10,11	cellular iron ion homeostasis	GO:0006879	0.015	0.0403	0.66	0.2	4.84136	-12.6834	LTF|26.7917;LCN2|0.2208;SOD1|5.7016	3	107	185	38520	http://www.ebi.ac.uk/QuickGO/GTerm?id=GO:0006879	[]
6	6	membrane lipid catabolic process	GO:0046466	0.0151	0.0405	0.08	0.14	4.84136	-12.6834	HEXB|1.3804;NEU1|0.597	2	39	185	38520	http://www.ebi.ac.uk/QuickGO/GTerm?id=GO:0046466	[]
11	8,9,10,11	positive regulation of protein tyrosine kinase activity	GO:0061098	0.0151	0.0405	-0.82	0.06	4.84136	-12.6834	ACE|8.2414;EGF|0.7943	2	39	185	38520	http://www.ebi.ac.uk/QuickGO/GTerm?id=GO:0061098	[]
6	6	phospholipid catabolic process	GO:0009395	0.0151	0.0405	1.79	0.31	4.84136	-12.6834	PRDX6|8.9536;IDH1|6.9183	2	39	185	38520	http://www.ebi.ac.uk/QuickGO/GTerm?id=GO:0009395	[]
5	4,5	negative regulation of cell proliferation	GO:0008285	0.0151	0.0405	-5.25	-0.38	4.84136	-12.6834	IGFBP7|0.0824;CDH13|0.1706;KRT4|0.0817;SLC9A3R1|3.8726;APOE|0.5105;AZGP1|1.2246;PLG|0.3908;SCGB1A1|8.5507	8	662	185	38520	http://www.ebi.ac.uk/QuickGO/GTerm?id=GO:0008285	[]
9	8,9	calcium ion import	GO:0070509	0.0154	0.0411	-1.62	-0.02	4.84136	-12.6834	SEMG1|41.6869;EGF|0.7943;SPINK1|0.0113	3	108	185	38520	http://www.ebi.ac.uk/QuickGO/GTerm?id=GO:0070509	[]
5	5	phenol-containing compound metabolic process	GO:0018958	0.0154	0.0411	0.45	0.18	4.84136	-12.6834	CPQ|0.3565;DDT|4.5709;PARK7|5.9704	3	108	185	38520	http://www.ebi.ac.uk/QuickGO/GTerm?id=GO:0018958	[]
5	5	positive regulation of binding	GO:0051099	0.0154	0.0411	-0.78	0.06	4.84136	-12.6834	VTN|0.0809;PARK7|5.9704;EGF|0.7943	3	108	185	38520	http://www.ebi.ac.uk/QuickGO/GTerm?id=GO:0051099	[]
8	5,7,8	innate immune response-activating signal transduction	GO:0002758	0.0154	0.0412	-3.19	-0.18	4.84136	-12.6834	CTSB|0.3105;CD14|0.8241;PGLYRP1|0.1722;LTF|26.7917;PGLYRP2|0.3945	5	301	185	38520	http://www.ebi.ac.uk/QuickGO/GTerm?id=GO:0002758	[]
3	3	multicellular organismal reproductive process	GO:0048609	0.0155	0.0413	3.51	0.48	4.84136	-12.6834	SEMG1|41.6869;CTSB|0.3105;ACE|8.2414;SERPINA5|0.0698;SPP1|0.1738;SOD1|5.7016;MMP7|0.0817;HEXB|1.3804;GGT1|5.0582	9	798	185	38520	http://www.ebi.ac.uk/QuickGO/GTerm?id=GO:0048609	[]
6	6	fat-soluble vitamin metabolic process	GO:0006775	0.0159	0.0422	-1.81	-0.04	4.84136	-12.6834	CUBN|0.1067;LRP2|0.1459	2	40	185	38520	http://www.ebi.ac.uk/QuickGO/GTerm?id=GO:0006775	[]
6	6	negative regulation of lymphocyte differentiation	GO:0045620	0.0159	0.0422	-1.17	0.02	4.84136	-12.6834	PGLYRP1|0.1722;PGLYRP2|0.3945	2	40	185	38520	http://www.ebi.ac.uk/QuickGO/GTerm?id=GO:0045620	[]
6	5,6	regulation of substrate adhesion-dependent cell spreading	GO:1900024	0.0159	0.0422	2.07	0.34	4.84136	-12.6834	OLFM4|10.7647;APOA1|10.8643	2	40	185	38520	http://www.ebi.ac.uk/QuickGO/GTerm?id=GO:1900024	[]
9	9	cGMP biosynthetic process	GO:0006182	0.0159	0.0422	-2.17	-0.08	4.84136	-12.6834	AQP1|0.0133;APOE|0.5105	2	40	185	38520	http://www.ebi.ac.uk/QuickGO/GTerm?id=GO:0006182	[]
5	5	lipid biosynthetic process	GO:0008610	0.0159	0.0423	5.94	0.72	4.84136	-12.6834	FABP5|0.0296;SOD1|5.7016;APOE|0.5105;APOA1|10.8643;C3|1.3804;HEXB|1.3804;APOA4|3.2211;GGT1|5.0582;IDH1|6.9183	9	802	185	38520	http://www.ebi.ac.uk/QuickGO/GTerm?id=GO:0008610	[]
7	6,7	enzyme linked receptor protein signaling pathway	GO:0007167	0.0164	0.0435	-9.71	-0.82	4.84136	-12.6834	HSP90AA1|2.466;LRG1|0.8017;VTN|0.0809;AHSG|0.1432;HSPB1|0.3837;FOLR1|0.2188;EGF|0.7943;CDH13|0.1706;CD63|5.7016;SLC9A3R1|3.8726;FBN1|0.1585;VASN|0.0982;IGFBP2|0.0698;APOA1|10.8643	14	1532	185	38520	http://www.ebi.ac.uk/QuickGO/GTerm?id=GO:0007167	[]
4	4	cellular ketone metabolic process	GO:0042180	0.0165	0.0437	3.06	0.44	4.84136	-12.6834	PARK7|5.9704;BHMT|0.8166;APOA1|10.8643;GLO1|4.4463;APOA4|3.2211	5	306	185	38520	http://www.ebi.ac.uk/QuickGO/GTerm?id=GO:0042180	[]
5	5	embryonic organ morphogenesis	GO:0048562	0.0165	0.0437	-1.34	0	4.84136	-12.6834	FOLR1|0.2188;SLC9A3R1|3.8726;FBN1|0.1585;SOD1|5.7016;NAGLU|0.5546	5	306	185	38520	http://www.ebi.ac.uk/QuickGO/GTerm?id=GO:0048562	[]
10	7,8,10	negative regulation of cysteine-type endopeptidase activity involved in apoptotic process	GO:0043154	0.0166	0.0438	-0.78	0.06	4.84136	-12.6834	AQP1|0.0133;PARK7|5.9704;CRYAB|0.2333	3	111	185	38520	http://www.ebi.ac.uk/QuickGO/GTerm?id=GO:0043154	[]
5	5	response to amino acid	GO:0043200	0.0166	0.0438	-2.3	-0.09	4.84136	-12.6834	GSN|0.0718;COL6A1|0.3162;FOLR1|0.2188	3	111	185	38520	http://www.ebi.ac.uk/QuickGO/GTerm?id=GO:0043200	[]
6	6	ammonium transport	GO:0015696	0.0166	0.0438	1.88	0.32	4.84136	-12.6834	PDZK1|11.695;AQP1|0.0133;PARK7|5.9704	3	111	185	38520	http://www.ebi.ac.uk/QuickGO/GTerm?id=GO:0015696	[]
9	6,9	auditory receptor cell differentiation	GO:0042491	0.0166	0.0439	1.34	0.27	4.84136	-12.6834	SLC9A3R1|3.8726;SOD1|5.7016	2	41	185	38520	http://www.ebi.ac.uk/QuickGO/GTerm?id=GO:0042491	[]
8	6,8	sulfur amino acid biosynthetic process	GO:0000097	0.0166	0.0439	-0.62	0.07	4.84136	-12.6834	BHMT|0.8166;GGT1|5.0582	2	41	185	38520	http://www.ebi.ac.uk/QuickGO/GTerm?id=GO:0000097	[]
9	6,7,8,9	axon regeneration	GO:0031103	0.0166	0.0439	-0.28	0.11	4.84136	-12.6834	SPP1|0.1738;APOA1|10.8643	2	41	185	38520	http://www.ebi.ac.uk/QuickGO/GTerm?id=GO:0031103	[]
6	5,6	organelle disassembly	GO:1903008	0.0167	0.044	1.07	0.24	4.84136	-12.6834	MYLK|0.7516;MDH1|2.7542;PARK7|5.9704;ANXA5|14.0605;KRT6A|0.1127	5	307	185	38520	http://www.ebi.ac.uk/QuickGO/GTerm?id=GO:1903008	[]
7	4,6,7	activation of innate immune response	GO:0002218	0.0169	0.0445	-3.19	-0.18	4.84136	-12.6834	CTSB|0.3105;CD14|0.8241;PGLYRP1|0.1722;LTF|26.7917;PGLYRP2|0.3945	5	308	185	38520	http://www.ebi.ac.uk/QuickGO/GTerm?id=GO:0002218	[]
6	4,5,6	positive regulation of lipid metabolic process	GO:0045834	0.017	0.0447	0.29	0.16	4.84136	-12.6834	APOE|0.5105;APOA1|10.8643;APOA4|3.2211	3	112	185	38520	http://www.ebi.ac.uk/QuickGO/GTerm?id=GO:0045834	[]
7	5,6,7	negative regulation of phosphorus metabolic process	GO:0010563	0.017	0.0447	-6.29	-0.48	4.84136	-12.6834	AHSG|0.1432;HSPB1|0.3837;SERPINB3|0.0377;PARK7|5.9704;SLC9A3R1|3.8726;SPINK1|0.0113;APOE|0.5105	7	547	185	38520	http://www.ebi.ac.uk/QuickGO/GTerm?id=GO:0010563	[]
6	6	negative regulation of phosphate metabolic process	GO:0045936	0.017	0.0447	-6.29	-0.48	4.84136	-12.6834	AHSG|0.1432;HSPB1|0.3837;SERPINB3|0.0377;PARK7|5.9704;SLC9A3R1|3.8726;SPINK1|0.0113;APOE|0.5105	7	547	185	38520	http://www.ebi.ac.uk/QuickGO/GTerm?id=GO:0045936	[]
5	5	alpha-amino acid metabolic process	GO:1901605	0.0172	0.0452	-1.6	-0.02	4.84136	-12.6834	GGH|0.492;CKB|15.1356;FOLR1|0.2188;PARK7|5.9704;BHMT|0.8166;GGT1|5.0582	6	425	185	38520	http://www.ebi.ac.uk/QuickGO/GTerm?id=GO:1901605	[]
4	4	positive regulation of transmembrane transport	GO:0034764	0.0174	0.0456	2.78	0.41	4.84136	-12.6834	PDZK1|11.695;PARK7|5.9704;CA2|8.7096	3	113	185	38520	http://www.ebi.ac.uk/QuickGO/GTerm?id=GO:0034764	[]
4	4	negative regulation of hemopoiesis	GO:1903707	0.0174	0.0456	-1.43	0	4.84136	-12.6834	PGLYRP1|0.1722;LTF|26.7917;PGLYRP2|0.3945	3	113	185	38520	http://www.ebi.ac.uk/QuickGO/GTerm?id=GO:1903707	[]
4	4	phosphorus metabolic process	GO:0006793	0.0174	0.0456	28.14	2.9	4.84136	-12.6834	PKM|4.9659;ALDOA|2.9923;MYLK|0.7516;MDH1|2.7542;PRDX6|8.9536;VTN|0.0809;LTF|26.7917;AHSG|0.1432;ACE|8.2414;HSPB1|0.3837;CTSH|0.4699;AQP1|0.0133;PGK1|2.0324;SERPINB3|0.0377;CKB|15.1356;FABP5|0.0296;PARK7|5.9704;HSPA8|2.3988;EGF|0.7943;TFF2|0.2655;CRYAB|0.2333;TPI1|2.0893;GAPDH|2.2699;FN1|2.3988;ACPP|64.2688;SLC9A3R1|3.8726;PRDX1|2.9107;PTPRN|0.7047;CAT|22.4905;SPINK1|0.0113;SOD1|5.7016;IL1RN|0.272…	38	5625	185	38520	http://www.ebi.ac.uk/QuickGO/GTerm?id=GO:0006793	[]
5	5	negative regulation of cytokine-mediated signaling pathway	GO:0001960	0.0174	0.0456	-0.47	0.09	4.84136	-12.6834	IL1RN|0.2729;APOA1|10.8643	2	42	185	38520	http://www.ebi.ac.uk/QuickGO/GTerm?id=GO:0001960	[]
4	4	mating	GO:0007618	0.0174	0.0456	1.76	0.31	4.84136	-12.6834	SEMG1|41.6869;HEXB|1.3804	2	42	185	38520	http://www.ebi.ac.uk/QuickGO/GTerm?id=GO:0007618	[]
4	4	response to electrical stimulus	GO:0051602	0.0174	0.0456	-1.99	-0.06	4.84136	-12.6834	CD14|0.8241;BRD1|0.0125	2	42	185	38520	http://www.ebi.ac.uk/QuickGO/GTerm?id=GO:0051602	[]
6	5,6	positive regulation of oxidoreductase activity	GO:0051353	0.0174	0.0456	-0.48	0.09	4.84136	-12.6834	PARK7|5.9704;APOE|0.5105	2	42	185	38520	http://www.ebi.ac.uk/QuickGO/GTerm?id=GO:0051353	[]
7	7	heart contraction	GO:0060047	0.0175	0.0456	-0.52	0.08	4.84136	-12.6834	GAA|0.6026;ACE|8.2414;DSC2|0.118;SOD1|5.7016	4	205	185	38520	http://www.ebi.ac.uk/QuickGO/GTerm?id=GO:0060047	[]
8	6,7,8	axon development	GO:0061564	0.0175	0.0457	-0.13	0.12	4.84136	-12.6834	HSP90AA1|2.466;COL6A1|0.3162;HSPA8|2.3988;SPP1|0.1738;FN1|2.3988;APOE|0.5105;APOA1|10.8643;CDH11|0.3105	8	680	185	38520	http://www.ebi.ac.uk/QuickGO/GTerm?id=GO:0061564	[]
4	4	positive regulation of leukocyte activation	GO:0002696	0.0175	0.0458	3.06	0.44	4.84136	-12.6834	DPP4|2.3335;VCAM1|9.4624;HLA-DRA|1.406;IGFBP2|0.0698;LAMP1|2.6062	5	311	185	38520	http://www.ebi.ac.uk/QuickGO/GTerm?id=GO:0002696	[]
6	5,6	regulation of cellular ketone metabolic process	GO:0010565	0.0177	0.0463	2.41	0.37	4.84136	-12.6834	PARK7|5.9704;BHMT|0.8166;APOA1|10.8643;APOA4|3.2211	4	206	185	38520	http://www.ebi.ac.uk/QuickGO/GTerm?id=GO:0010565	[]
9	8,9	negative regulation of cysteine-type endopeptidase activity	GO:2000117	0.0178	0.0463	-0.78	0.06	4.84136	-12.6834	AQP1|0.0133;PARK7|5.9704;CRYAB|0.2333	3	114	185	38520	http://www.ebi.ac.uk/QuickGO/GTerm?id=GO:2000117	[]
6	6	heart process	GO:0003015	0.018	0.0469	-0.52	0.08	4.84136	-12.6834	GAA|0.6026;ACE|8.2414;DSC2|0.118;SOD1|5.7016	4	207	185	38520	http://www.ebi.ac.uk/QuickGO/GTerm?id=GO:0003015	[]
6	5,6	viral life cycle	GO:0019058	0.0181	0.0471	0.75	0.21	4.84136	-12.6834	GSN|0.0718;PDCD6IP|2.0701;DPP4|2.3335;LTF|26.7917;SERPINB3|0.0377;APOE|0.5105	6	430	185	38520	http://www.ebi.ac.uk/QuickGO/GTerm?id=GO:0019058	[]
5	4,5	establishment of protein localization	GO:0045184	0.0182	0.0471	10.47	1.16	4.84136	-12.6834	PDZK1|11.695;CD14|0.8241;HSP90AA1|2.466;PDCD6IP|2.0701;LCP1|3.5645;PARK7|5.9704;YWHAZ|2.704;CUBN|0.1067;LMAN2|0.2466;EGF|0.7943;CTSA|0.4571;CDH1|0.8091;FN1|2.3988;CD63|5.7016;SLC9A3R1|3.8726;PRDX1|2.9107;PTPRN|0.7047;LAMP1|2.6062;IL1RN|0.2729;APOE|0.5105;APOA1|10.8643;AZGP1|1.2246	22	2841	185	38520	http://www.ebi.ac.uk/QuickGO/GTerm?id=GO:0045184	[]
6	6	lipid homeostasis	GO:0055088	0.0182	0.0471	0.29	0.16	4.84136	-12.6834	APOE|0.5105;APOA1|10.8643;APOA4|3.2211	3	115	185	38520	http://www.ebi.ac.uk/QuickGO/GTerm?id=GO:0055088	[]
5	5	blood vessel remodeling	GO:0001974	0.0182	0.0471	-0.22	0.11	4.84136	-12.6834	ACE|8.2414;BGN|0.1995	2	43	185	38520	http://www.ebi.ac.uk/QuickGO/GTerm?id=GO:0001974	[]
7	5,6,7	negative regulation of reactive oxygen species metabolic process	GO:2000378	0.0182	0.0471	-0.9	0.05	4.84136	-12.6834	HP|34.3558;CRYAB|0.2333	2	43	185	38520	http://www.ebi.ac.uk/QuickGO/GTerm?id=GO:2000378	[]
7	6,7	regulation of interleukin-1 beta production	GO:0032651	0.0182	0.0471	-0.62	0.07	4.84136	-12.6834	HSPB1|0.3837;APOA1|10.8643	2	43	185	38520	http://www.ebi.ac.uk/QuickGO/GTerm?id=GO:0032651	[]
6	6	phenol-containing compound biosynthetic process	GO:0046189	0.0182	0.0471	1.44	0.28	4.84136	-12.6834	DDT|4.5709;PARK7|5.9704	2	43	185	38520	http://www.ebi.ac.uk/QuickGO/GTerm?id=GO:0046189	[]
6	6	smooth muscle cell migration	GO:0014909	0.0182	0.0471	0.18	0.15	4.84136	-12.6834	VTN|0.0809;ACE|8.2414	2	43	185	38520	http://www.ebi.ac.uk/QuickGO/GTerm?id=GO:0014909	[]
4	4	cellular extravasation	GO:0045123	0.0182	0.0471	2.01	0.33	4.84136	-12.6834	OLFM4|10.7647;VCAM1|9.4624	2	43	185	38520	http://www.ebi.ac.uk/QuickGO/GTerm?id=GO:0045123	[]
5	5	response to amine	GO:0014075	0.0182	0.0471	-0.25	0.11	4.84136	-12.6834	CTSB|0.3105;SOD1|5.7016	2	43	185	38520	http://www.ebi.ac.uk/QuickGO/GTerm?id=GO:0014075	[]
3	3	multicellular organism reproduction	GO:0032504	0.0184	0.0475	3.51	0.48	4.84136	-12.6834	SEMG1|41.6869;CTSB|0.3105;ACE|8.2414;SERPINA5|0.0698;SPP1|0.1738;SOD1|5.7016;MMP7|0.0817;HEXB|1.3804;GGT1|5.0582	9	822	185	38520	http://www.ebi.ac.uk/QuickGO/GTerm?id=GO:0032504	[]
6	6	regulation of autophagy	GO:0010506	0.0184	0.0476	1.07	0.24	4.84136	-12.6834	MYLK|0.7516;MDH1|2.7542;PARK7|5.9704;ANXA5|14.0605;KRT6A|0.1127	5	315	185	38520	http://www.ebi.ac.uk/QuickGO/GTerm?id=GO:0010506	[]
7	5,7	regulation of alcohol biosynthetic process	GO:1902930	0.019	0.0477	-0.46	0.09	4.84136	-12.6834	SOD1|5.7016;APOE|0.5105	2	44	185	38520	http://www.ebi.ac.uk/QuickGO/GTerm?id=GO:1902930	[]
6	5,6	intermediate filament cytoskeleton organization	GO:0045104	0.019	0.0477	-0.06	0.13	4.84136	-12.6834	KRT16|0.1995;SOD1|5.7016	2	44	185	38520	http://www.ebi.ac.uk/QuickGO/GTerm?id=GO:0045104	[]
9	7,9	regulation of mitochondrial electron transport, NADH to ubiquinone	GO:1902956	0.0191	0.0477	0	0.14	4.84136	-12.6834	PARK7|5.9704	1	4	185	38520	http://www.ebi.ac.uk/QuickGO/GTerm?id=GO:1902956	[]
3	3	positive regulation of fibrinolysis	GO:0051919	0.0191	0.0477	0	0.14	4.84136	-12.6834	PLG|0.3908	1	4	185	38520	http://www.ebi.ac.uk/QuickGO/GTerm?id=GO:0051919	[]
9	7,9	involuntary skeletal muscle contraction	GO:0003011	0.0191	0.0477	0	0.14	4.84136	-12.6834	GAA|0.6026	1	4	185	38520	http://www.ebi.ac.uk/QuickGO/GTerm?id=GO:0003011	[]
7	5,6,7	positive regulation of cellular respiration	GO:1901857	0.0191	0.0477	0	0.14	4.84136	-12.6834	PARK7|5.9704	1	4	185	38520	http://www.ebi.ac.uk/QuickGO/GTerm?id=GO:1901857	[]
7	5,6,7	positive regulation of extracellular exosome assembly	GO:1903553	0.0191	0.0477	0	0.14	4.84136	-12.6834	PDCD6IP|2.0701	1	4	185	38520	http://www.ebi.ac.uk/QuickGO/GTerm?id=GO:1903553	[]
9	7,8,9	glutamate receptor clustering	GO:0097688	0.0191	0.0477	0	0.14	4.84136	-12.6834	APOE|0.5105	1	4	185	38520	http://www.ebi.ac.uk/QuickGO/GTerm?id=GO:0097688	[]
8	5,6,8	antifungal humoral response	GO:0019732	0.0191	0.0477	0	0.14	4.84136	-12.6834	LTF|26.7917	1	4	185	38520	http://www.ebi.ac.uk/QuickGO/GTerm?id=GO:0019732	[]
6	6	positive regulation of dopamine metabolic process	GO:0045964	0.0191	0.0477	0	0.14	4.84136	-12.6834	PARK7|5.9704	1	4	185	38520	http://www.ebi.ac.uk/QuickGO/GTerm?id=GO:0045964	[]
8	5,6,8	regulation of gap junction assembly	GO:1903596	0.0191	0.0477	0	0.14	4.84136	-12.6834	ACE|8.2414	1	4	185	38520	http://www.ebi.ac.uk/QuickGO/GTerm?id=GO:1903596	[]
7	6,7	carbon dioxide transport	GO:0015670	0.0191	0.0477	0	0.14	4.84136	-12.6834	AQP1|0.0133	1	4	185	38520	http://www.ebi.ac.uk/QuickGO/GTerm?id=GO:0015670	[]
10	6,7,9,10	positive regulation of endothelial cell chemotaxis by VEGF-activated vascular endothelial growth factor receptor signaling pathway	GO:0038033	0.0191	0.0477	0	0.14	4.84136	-12.6834	HSPB1|0.3837	1	4	185	38520	http://www.ebi.ac.uk/QuickGO/GTerm?id=GO:0038033	[]
10	9,10	cellular chloride ion homeostasis	GO:0030644	0.0191	0.0477	0	0.14	4.84136	-12.6834	CKB|15.1356	1	4	185	38520	http://www.ebi.ac.uk/QuickGO/GTerm?id=GO:0030644	[]
8	6,8	positive regulation of catecholamine metabolic process	GO:0045915	0.0191	0.0477	0	0.14	4.84136	-12.6834	PARK7|5.9704	1	4	185	38520	http://www.ebi.ac.uk/QuickGO/GTerm?id=GO:0045915	[]
6	4,6	detoxification of inorganic compound	GO:0061687	0.0191	0.0477	0	0.14	4.84136	-12.6834	PARK7|5.9704	1	4	185	38520	http://www.ebi.ac.uk/QuickGO/GTerm?id=GO:0061687	[]
7	5,6,7	Golgi reassembly	GO:0090168	0.0191	0.0477	0	0.14	4.84136	-12.6834	YWHAZ|2.704	1	4	185	38520	http://www.ebi.ac.uk/QuickGO/GTerm?id=GO:0090168	[]
8	6,8	plasma lipoprotein particle oxidation	GO:0034441	0.0191	0.0477	0	0.14	4.84136	-12.6834	APOA4|3.2211	1	4	185	38520	http://www.ebi.ac.uk/QuickGO/GTerm?id=GO:0034441	[]
8	6,7,8	regulation of nitric oxide mediated signal transduction	GO:0010749	0.0191	0.0477	0	0.14	4.84136	-12.6834	SPINK1|0.0113	1	4	185	38520	http://www.ebi.ac.uk/QuickGO/GTerm?id=GO:0010749	[]
6	6	AMPA glutamate receptor clustering	GO:0097113	0.0191	0.0477	0	0.14	4.84136	-12.6834	APOE|0.5105	1	4	185	38520	http://www.ebi.ac.uk/QuickGO/GTerm?id=GO:0097113	[]
5	5	membrane raft distribution	GO:0031580	0.0191	0.0477	0	0.14	4.84136	-12.6834	GSN|0.0718	1	4	185	38520	http://www.ebi.ac.uk/QuickGO/GTerm?id=GO:0031580	[]
7	5,7	cardiac neural crest cell migration involved in outflow tract morphogenesis	GO:0003253	0.0191	0.0477	0	0.14	4.84136	-12.6834	FOLR1|0.2188	1	4	185	38520	http://www.ebi.ac.uk/QuickGO/GTerm?id=GO:0003253	[]
7	7	renal water absorption	GO:0070295	0.0191	0.0477	0	0.14	4.84136	-12.6834	AQP1|0.0133	1	4	185	38520	http://www.ebi.ac.uk/QuickGO/GTerm?id=GO:0070295	[]
6	6	multicellular organismal macromolecule catabolic process	GO:0044266	0.0191	0.0477	0	0.14	4.84136	-12.6834	ACE|8.2414	1	4	185	38520	http://www.ebi.ac.uk/QuickGO/GTerm?id=GO:0044266	[]
5	5	response to lipid hydroperoxide	GO:0006982	0.0191	0.0477	0	0.14	4.84136	-12.6834	APOA4|3.2211	1	4	185	38520	http://www.ebi.ac.uk/QuickGO/GTerm?id=GO:0006982	[]
5	4,5	amyloid fibril formation	GO:1990000	0.0191	0.0477	0	0.14	4.84136	-12.6834	GSN|0.0718	1	4	185	38520	http://www.ebi.ac.uk/QuickGO/GTerm?id=GO:1990000	[]
7	6,7	thyroid hormone mediated signaling pathway	GO:0002154	0.0191	0.0477	0	0.14	4.84136	-12.6834	PRCP|0.0685	1	4	185	38520	http://www.ebi.ac.uk/QuickGO/GTerm?id=GO:0002154	[]
6	6	membrane raft polarization	GO:0001766	0.0191	0.0477	0	0.14	4.84136	-12.6834	GSN|0.0718	1	4	185	38520	http://www.ebi.ac.uk/QuickGO/GTerm?id=GO:0001766	[]
6	6	lactate biosynthetic process	GO:0019249	0.0191	0.0477	0	0.14	4.84136	-12.6834	PARK7|5.9704	1	4	185	38520	http://www.ebi.ac.uk/QuickGO/GTerm?id=GO:0019249	[]
6	5,6	positive regulation of receptor catabolic process	GO:2000646	0.0191	0.0477	0	0.14	4.84136	-12.6834	APOE|0.5105	1	4	185	38520	http://www.ebi.ac.uk/QuickGO/GTerm?id=GO:2000646	[]
13	4,5,6,7,8,9,12,13	positive regulation of cellular pH reduction	GO:0032849	0.0191	0.0477	0	0.14	4.84136	-12.6834	CA2|8.7096	1	4	185	38520	http://www.ebi.ac.uk/QuickGO/GTerm?id=GO:0032849	[]
7	4,6,7	negative regulation of trophoblast cell migration	GO:1901164	0.0191	0.0477	0	0.14	4.84136	-12.6834	TIMP1|18.197	1	4	185	38520	http://www.ebi.ac.uk/QuickGO/GTerm?id=GO:1901164	[]
7	5,7	multicellular organismal protein catabolic process	GO:0044254	0.0191	0.0477	0	0.14	4.84136	-12.6834	ACE|8.2414	1	4	185	38520	http://www.ebi.ac.uk/QuickGO/GTerm?id=GO:0044254	[]
9	5,6,8,9	positive regulation of saliva secretion	GO:0046878	0.0191	0.0477	0	0.14	4.84136	-12.6834	AQP1|0.0133	1	4	185	38520	http://www.ebi.ac.uk/QuickGO/GTerm?id=GO:0046878	[]
7	6,7	negative regulation of lipoprotein oxidation	GO:0034443	0.0191	0.0477	0	0.14	4.84136	-12.6834	APOA4|3.2211	1	4	185	38520	http://www.ebi.ac.uk/QuickGO/GTerm?id=GO:0034443	[]
7	6,7	negative regulation of cell-cell adhesion mediated by cadherin	GO:2000048	0.0191	0.0477	0	0.14	4.84136	-12.6834	PLG|0.3908	1	4	185	38520	http://www.ebi.ac.uk/QuickGO/GTerm?id=GO:2000048	[]
10	9,10	regulation of peptidyl-tyrosine autophosphorylation	GO:1900084	0.0191	0.0477	0	0.14	4.84136	-12.6834	ACE|8.2414	1	4	185	38520	http://www.ebi.ac.uk/QuickGO/GTerm?id=GO:1900084	[]
10	7,8,9,10	negative regulation of protein deubiquitination	GO:0090086	0.0191	0.0477	0	0.14	4.84136	-12.6834	PARK7|5.9704	1	4	185	38520	http://www.ebi.ac.uk/QuickGO/GTerm?id=GO:0090086	[]
6	6	calcium-independent cell-matrix adhesion	GO:0007161	0.0191	0.0477	0	0.14	4.84136	-12.6834	FN1|2.3988	1	4	185	38520	http://www.ebi.ac.uk/QuickGO/GTerm?id=GO:0007161	[]
8	6,7,8	negative regulation of extracellular matrix disassembly	GO:0010716	0.0191	0.0477	0	0.14	4.84136	-12.6834	DPP4|2.3335	1	4	185	38520	http://www.ebi.ac.uk/QuickGO/GTerm?id=GO:0010716	[]
5	5	creatinine metabolic process	GO:0046449	0.0191	0.0477	0	0.14	4.84136	-12.6834	MME|2.2284	1	4	185	38520	http://www.ebi.ac.uk/QuickGO/GTerm?id=GO:0046449	[]
8	6,7,8	regulation of integrin biosynthetic process	GO:0045113	0.0191	0.0477	0	0.14	4.84136	-12.6834	S100A9|0.0619	1	4	185	38520	http://www.ebi.ac.uk/QuickGO/GTerm?id=GO:0045113	[]
5	5	protein digestion	GO:0044256	0.0191	0.0477	0	0.14	4.84136	-12.6834	ACE|8.2414	1	4	185	38520	http://www.ebi.ac.uk/QuickGO/GTerm?id=GO:0044256	[]
[truncated: 2,218 more rows]

## Sheet: CC
Table SIIIB. Statistically significant GO terms in the category of cellular component for AKI-24 h/CON-24 h.
[truncated: 406 more rows]

## Sheet: MF
Table SIIIC. Statistically significant GO terms in the category of molecular function for AKI-24 h/CON-24 h.
[truncated: 585 more rows]
